# Supplementary material for: Homeodomain-interacting protein kinase maintains neuronal homeostasis during normal Caenorhabditis elegans aging and systemically regulates longevity from serotonergic and GABAergic neurons
Source: bioRxiv preprint, doi:10.1101/2023.01.11.523661, version 3 (2023-06-14)
Supplement: Supplementary File 10 [file 523661_file12.xlsx]

## Sheet: DE Analysis- NO THRESHOLD
WBGeneID	GeneSymbol	DESeq2_log2FC (hpk-1 vs N2)	DESeq2_fdrpval	raw count range: hpk-1	raw count range: N2	avg_TPM: hpk-1	avg_TPM: N2	molecular_name	Human_GeneSymbol	Human_EnsemblID
WBGene00000001	aap-1	-0.680739	4.56162e-06	2733 - 3245	3873 - 4171	66.0433	85.6167	Y110A7A.10	PIK3R1,PIK3R2,PIK3R3	ENSG00000145675,ENSG00000105647,ENSG00000117461,ENSG00000268173,ENSG00000278139
WBGene00000002	aat-1	0.222562	0.518219	180 - 190	93 - 219	3.82333	2.72333	F27C8.1	SLC7A8,SLC7A6,SLC7A5,SLC7A7,SLC7A10,SLC7A9	ENSG00000092068,ENSG00000103064,ENSG00000103257,ENSG00000155465,ENSG00000130876,ENSG00000021488
WBGene00000003	aat-2	0.460417	0.035099	215 - 247	125 - 175	5.35667	3.14667	F07C3.7	SLC7A7,SLC7A8,SLC7A6,SLC7A5,SLC7A10,SLC7A9	ENSG00000155465,ENSG00000092068,ENSG00000103064,ENSG00000103257,ENSG00000130876,ENSG00000021488
WBGene00000004	aat-3	0.388353	0.05286	913 - 948	465 - 871	21.5433	13.4333	F52H2.2	SLC7A8,SLC7A6,SLC7A5,SLC7A7,SLC7A10,SLC7A9	ENSG00000092068,ENSG00000103064,ENSG00000103257,ENSG00000155465,ENSG00000130876,ENSG00000021488
WBGene00000005	aat-4	-1.25924	4.10906e-08	83 - 94	186 - 212	2.01333	4.08333	T13A10.10
WBGene00000006	aat-5	1.44223	5.08691e-08	189 - 242	51 - 89	4.91333	1.39333	C55C2.5
WBGene00000007	aat-6	-0.345085	0.244691	86 - 96	86 - 122	2.17	2.33333	T11F9.4
WBGene00000008	aat-7	0.261058	0.693335	11 - 17	6 - 15	0.366667	0.246667	F54D12.3
WBGene00000009	aat-8	0.0419175	0.957402	6 - 8	4 - 9	0.196667	0.146667	F28F9.4
WBGene00000010	aat-9	-0.289661	0.0352196	1582 - 1664	1634 - 1771	31.6133	31.25	Y53H1C.1
WBGene00000012	abf-1	0.184055	0.794874	4 - 6	1 - 6	0.98	0.376667	C50F2.9
WBGene00000013	abf-2	-1.15623	2.93766e-05	119 - 153	211 - 320	16.3833	30.7533	C50F2.10
WBGene00000015	abf-4	0.738614	0.234824	7 - 9	1 - 4	0.976667	0.256667	Y38H6C.22
WBGene00000016	abf-5	1.51826	0.00100482	172 - 190	14 - 101	17.64	3.94667	T22H6.5
WBGene00000017	abf-6	1.11675	0.0237997	120 - 166	15 - 113	10.1233	3.18667	T22H6.7
WBGene00000018	abl-1	0.342498	0.0687999	920 - 1020	526 - 899	9.52333	6.11	M79.1	ABL1,ABL2	ENSG00000097007,ENSG00000143322
WBGene00000019	abt-1	-0.48788	0.279448	24 - 47	41 - 51	0.283333	0.326667	C24F3.5
WBGene00000020	abt-2	0.742021	0.000647724	551 - 634	212 - 356	3.50333	1.63	F12B6.1	ABCA1,ABCA7,ABCA12,ABCA13,ABCA4,ABCA2,ABCA8,ABCA9,ABCA6,ABCA10,ABCA5,ABCA3	ENSG00000165029,ENSG00000064687,ENSG00000144452,ENSG00000179869,ENSG00000198691,ENSG00000107331,ENSG00000141338,ENSG00000154258,ENSG00000154262,ENSG00000154263,ENSG00000154265,ENSG00000167972
WBGene00000022	abt-4	-0.932249	8.09779e-10	678 - 762	931 - 1403	5.01333	7.96333	Y39D8C.1	ABCA3,ABCA8,ABCA9,ABCA6,ABCA10,ABCA5,ABCA7,ABCA2,ABCA12,ABCA1,ABCA13,ABCA4	ENSG00000167972,ENSG00000141338,ENSG00000154258,ENSG00000154262,ENSG00000154263,ENSG00000154265,ENSG00000064687,ENSG00000107331,ENSG00000144452,ENSG00000165029,ENSG00000179869,ENSG00000198691
WBGene00000023	abt-5	0.234311	0.513008	100 - 115	57 - 116	0.85	0.573333	Y53C10A.9	ABCA10,ABCA8,ABCA9,ABCA6,ABCA5,ABCA7,ABCA2,ABCA12,ABCA1,ABCA13,ABCA4,ABCA3	ENSG00000154263,ENSG00000141338,ENSG00000154258,ENSG00000154262,ENSG00000154265,ENSG00000064687,ENSG00000107331,ENSG00000144452,ENSG00000165029,ENSG00000179869,ENSG00000198691,ENSG00000167972
WBGene00000024	abu-1	0.592315	1	0 - 7	0 - 1	0.583333	0.05	AC3.3	KRTAP10-6,KRTAP10-4,KRTAP10-9,KRTAP10-5,KRTAP10-11	ENSG00000188155,ENSG00000215454,ENSG00000221837,ENSG00000241123,ENSG00000243489
WBGene00000031	abu-8	2.01666	0.000277299	12 - 30	1 - 2	0.646667	0.0466667	C03A7.14
WBGene00000033	abu-10	1.60679	0.00403879	15 - 39	1 - 7	0.8	0.0933333	F35A5.3	KRTAP10-7	ENSG00000272804
WBGene00000034	abu-11	2.01839	0.000107011	23 - 54	3 - 5	1.13667	0.103333	T01D1.6
WBGene00000035	ace-1	-0.202342	0.472289	140 - 176	150 - 177	2.91333	2.71	W09B12.1	ACHE,BCHE	ENSG00000087085,ENSG00000114200
WBGene00000036	ace-2	1.3052	4.75484e-08	301 - 326	72 - 146	6.00667	1.86333	Y44E3A.2	BCHE,ACHE	ENSG00000114200,ENSG00000087085
WBGene00000037	ace-3	1.65964	1.09103e-07	112 - 122	23 - 32	2.2	0.493333	Y48B6A.8	ACHE,BCHE	ENSG00000087085,ENSG00000114200
WBGene00000038	ace-4	0.609499	0.330458	7 - 10	0 - 7	0.146667	0.0333333	Y48B6A.7	ACHE,BCHE	ENSG00000087085,ENSG00000114200
WBGene00000039	acn-1	2.03097	6.67362e-13	1322 - 1883	204 - 567	19.8767	3.68333	C42D8.5	ACE2,ACE,TMEM27	ENSG00000130234,ENSG00000159640,ENSG00000264813,ENSG00000147003
WBGene00000040	aco-1	0.716525	0.000185476	6281 - 6504	2471 - 4983	83.72	41.6667	ZK455.1	ACO1,IREB2,ACO2	ENSG00000122729,ENSG00000136381,ENSG00000100412
WBGene00000041	aco-2	0.202825	0.168878	21649 - 24280	16218 - 17854	336.437	236.81	F54H12.1	ACO2,ACO1,IREB2	ENSG00000100412,ENSG00000122729,ENSG00000136381
WBGene00000042	acr-2	1.08736	0.0257547	30 - 41	7 - 19	0.693333	0.226667	K11G12.2	CHRNA3,CHRNA4,CHRNE,CHRNB4,CHRNA2,CHRND,CHRNA1,CHRNB3,CHRNA6,CHRNB2,CHRNA5,CHRNB1,CHRNG	ENSG00000080644,ENSG00000101204,ENSG00000108556,ENSG00000117971,ENSG00000120903,ENSG00000135902,ENSG00000138435,ENSG00000147432,ENSG00000147434,ENSG00000160716,ENSG00000169684,ENSG00000170175,ENSG00000196811
WBGene00000043	acr-3	-0.0109787	0.988295	6 - 9	4 - 12	0.183333	0.133333	K11G12.7	CHRNA3,CHRNA4,CHRNE,CHRNB4,CHRNA2,CHRND,CHRNA1,CHRNB3,CHRNA6,CHRNB2,CHRNA5,CHRNB1,CHRNG	ENSG00000080644,ENSG00000101204,ENSG00000108556,ENSG00000117971,ENSG00000120903,ENSG00000135902,ENSG00000138435,ENSG00000147432,ENSG00000147434,ENSG00000160716,ENSG00000169684,ENSG00000170175,ENSG00000196811
WBGene00000044	acr-5	0.0163576	0.977983	27 - 33	18 - 36	0.566667	0.413333	K03F8.2	HTR3B,HTR3A,HTR3C,HTR3E,HTR3D,ZACN	ENSG00000149305,ENSG00000166736,ENSG00000178084,ENSG00000186038,ENSG00000186090,ENSG00000186919
WBGene00000045	acr-6	0.580751	0.348504	4 - 12	0 - 4	0.156667	0.04	ZK973.5	CHRNA3,CHRNA4,CHRNE,CHRNB4,CHRNA2,CHRND,CHRNA1,CHRNB3,CHRNA6,CHRNB2,CHRNA5,CHRNB1,CHRNG	ENSG00000080644,ENSG00000101204,ENSG00000108556,ENSG00000117971,ENSG00000120903,ENSG00000135902,ENSG00000138435,ENSG00000147432,ENSG00000147434,ENSG00000160716,ENSG00000169684,ENSG00000170175,ENSG00000196811
WBGene00000046	acr-7	0.434995	0.472767	14 - 19	7 - 12	0.373333	0.193333	T09A5.3	CHRNA7,CHRFAM7A	ENSG00000175344,ENSG00000166664
WBGene00000047	acr-8	1.71346	1.54692e-05	67 - 68	10 - 21	1.3	0.23	ZC504.2	CHRNA3,CHRNA4,CHRNE,CHRNB4,CHRNA2,CHRND,CHRNA1,CHRNB3,CHRNA6,CHRNB2,CHRNA5,CHRNB1,CHRNG	ENSG00000080644,ENSG00000101204,ENSG00000108556,ENSG00000117971,ENSG00000120903,ENSG00000135902,ENSG00000138435,ENSG00000147432,ENSG00000147434,ENSG00000160716,ENSG00000169684,ENSG00000170175,ENSG00000196811
WBGene00000048	acr-9	-0.462566	0.357622	20 - 22	24 - 31	0.426667	0.513333	C40C9.2	CHRNA7,CHRFAM7A	ENSG00000175344,ENSG00000166664
WBGene00000050	acr-11	0.0802942	0.892417	24 - 42	18 - 38	0.813333	0.623333	D2092.3	CHRNA7,CHRFAM7A	ENSG00000175344,ENSG00000166664
WBGene00000051	acr-12	0.40496	0.201117	96 - 138	62 - 92	2.17	1.3	R01E6.4	CHRNA3,CHRNA4,CHRNE,CHRNB4,CHRNA2,CHRND,CHRNA1,CHRNB3,CHRNA6,CHRNB2,CHRNA5,CHRNB1,CHRNG	ENSG00000080644,ENSG00000101204,ENSG00000108556,ENSG00000117971,ENSG00000120903,ENSG00000135902,ENSG00000138435,ENSG00000147432,ENSG00000147434,ENSG00000160716,ENSG00000169684,ENSG00000170175,ENSG00000196811
WBGene00000053	acr-14	0.357136	0.593109	8 - 20	4 - 13	0.31	0.156667	T05C12.2	CHRNA7,CHRFAM7A	ENSG00000175344,ENSG00000166664
WBGene00000054	acr-15	0.626552	0.21681	46 - 58	14 - 54	1.40333	0.693333	F25G6.4	CHRFAM7A,CHRNA7	ENSG00000166664,ENSG00000175344
WBGene00000055	acr-16	0.168018	0.675671	74 - 105	52 - 95	1.99	1.40667	F25G6.3	CHRNA7,CHRFAM7A	ENSG00000175344,ENSG00000166664
WBGene00000056	acr-17	-0.323202	0.453888	38 - 60	37 - 74	1.35667	1.41333	F53E10.2	HTR3B,HTR3A,HTR3C,HTR3E,HTR3D,ZACN	ENSG00000149305,ENSG00000166736,ENSG00000178084,ENSG00000186038,ENSG00000186090,ENSG00000186919
WBGene00000057	acr-18	0.324229	0.407311	57 - 66	37 - 53	1.51	1.02	F28F8.1	HTR3B,HTR3A,HTR3C,HTR3E,HTR3D,ZACN	ENSG00000149305,ENSG00000166736,ENSG00000178084,ENSG00000186038,ENSG00000186090,ENSG00000186919
WBGene00000058	acr-19	0.95488	0.0588655	25 - 36	6 - 17	0.713333	0.246667	C31H5.3	CHRFAM7A,CHRNA7	ENSG00000166664,ENSG00000175344
WBGene00000059	acr-20	0.553159	0.225167	43 - 46	17 - 38	0.94	0.516667	R06A4.10	HTR3B,HTR3A,HTR3C,HTR3E,HTR3D,ZACN	ENSG00000149305,ENSG00000166736,ENSG00000178084,ENSG00000186038,ENSG00000186090,ENSG00000186919
WBGene00000060	acr-21	0.350174	0.601987	13 - 15	1 - 13	0.316667	0.186667	F27B3.2	CHRNA9,CHRNA10	ENSG00000174343,ENSG00000129749
WBGene00000061	lgc-11	0.96763	0.0943657	13 - 21	3 - 9	0.45	0.12	F48E3.7	HTR3B,HTR3A,HTR3C,HTR3E,HTR3D,ZACN	ENSG00000149305,ENSG00000166736,ENSG00000178084,ENSG00000186038,ENSG00000186090,ENSG00000186919
WBGene00000062	acr-23	0.152468	0.820592	9 - 20	11 - 11	0.313333	0.223333	F59B1.9	HTR3B,HTR3A,HTR3C,HTR3E,HTR3D,ZACN	ENSG00000149305,ENSG00000166736,ENSG00000178084,ENSG00000186038,ENSG00000186090,ENSG00000186919
WBGene00000063	act-1	0.253602	0.176107	1783 - 2166	1156 - 1584	751.23	500.227	T04C12.6	ACTG1,ACTB,ACTBL2,ACTRT1,ACTL7B,ACTRT2,ACTL9,ACTRT3,ACTL7A,ACTA2,ACTA1,ACTC1,ACTG2,POTEI,POTED,POTEC,POTEH,POTEM,POTEE,POTEA,POTEF,POTEJ,POTEB2,POTEB	ENSG00000184009,ENSG00000075624,ENSG00000169067,ENSG00000123165,ENSG00000148156,ENSG00000169717,ENSG00000181786,ENSG00000184378,ENSG00000187003,ENSG00000107796,ENSG00000143632,ENSG00000159251,ENSG00000163017,ENSG00000196834,ENSG00000166351,ENSG00000183206,ENSG00000198062,ENSG00000222036,ENSG00000188219,ENSG00000188877,ENSG00000196604,ENSG00000222038,ENSG00000230031,ENSG00000233917
WBGene00000064	act-2	-0.113928	0.494084	22890 - 26317	22944 - 24063	941.79	819.767	T04C12.5	ACTG1,ACTB,ACTBL2,ACTRT1,ACTL7B,ACTRT2,ACTL9,ACTRT3,ACTL7A,ACTA2,ACTA1,ACTC1,ACTG2,POTEI,POTED,POTEC,POTEH,POTEM,POTEE,POTEA,POTEF,POTEJ,POTEB2,POTEB	ENSG00000184009,ENSG00000075624,ENSG00000169067,ENSG00000123165,ENSG00000148156,ENSG00000169717,ENSG00000181786,ENSG00000184378,ENSG00000187003,ENSG00000107796,ENSG00000143632,ENSG00000159251,ENSG00000163017,ENSG00000196834,ENSG00000166351,ENSG00000183206,ENSG00000198062,ENSG00000222036,ENSG00000188219,ENSG00000188877,ENSG00000196604,ENSG00000222038,ENSG00000230031,ENSG00000233917
WBGene00000065	act-3	0.275787	0.0833567	2518 - 3074	1757 - 2148	417.777	277.49	T04C12.4	ACTG1,ACTB,ACTBL2,ACTRT1,ACTL7B,ACTRT2,ACTL9,ACTRT3,ACTL7A,ACTA2,ACTA1,ACTC1,ACTG2,POTEI,POTED,POTEC,POTEH,POTEM,POTEE,POTEA,POTEF,POTEJ,POTEB2,POTEB	ENSG00000184009,ENSG00000075624,ENSG00000169067,ENSG00000123165,ENSG00000148156,ENSG00000169717,ENSG00000181786,ENSG00000184378,ENSG00000187003,ENSG00000107796,ENSG00000143632,ENSG00000159251,ENSG00000163017,ENSG00000196834,ENSG00000166351,ENSG00000183206,ENSG00000198062,ENSG00000222036,ENSG00000188219,ENSG00000188877,ENSG00000196604,ENSG00000222038,ENSG00000230031,ENSG00000233917
WBGene00000066	act-4	0.92584	2.55029e-11	15290 - 17101	6844 - 7422	419.16	174.927	M03F4.2	ACTG1,ACTB,ACTBL2,ACTRT1,ACTL7B,ACTRT2,ACTL9,ACTRT3,ACTL7A,ACTA2,ACTA1,ACTC1,ACTG2,POTEI,POTED,POTEC,POTEH,POTEM,POTEE,POTEA,POTEF,POTEJ,POTEB2,POTEB	ENSG00000184009,ENSG00000075624,ENSG00000169067,ENSG00000123165,ENSG00000148156,ENSG00000169717,ENSG00000181786,ENSG00000184378,ENSG00000187003,ENSG00000107796,ENSG00000143632,ENSG00000159251,ENSG00000163017,ENSG00000196834,ENSG00000166351,ENSG00000183206,ENSG00000198062,ENSG00000222036,ENSG00000188219,ENSG00000188877,ENSG00000196604,ENSG00000222038,ENSG00000230031,ENSG00000233917
WBGene00000067	act-5	0.132261	0.501198	5590 - 6813	4371 - 5132	188.557	136.873	T25C8.2	ACTA2,ACTA1,ACTC1,ACTG2,POTEI,ACTB,ACTBL2,ACTG1,POTED,POTEC,POTEH,POTEM,POTEE,POTEA,POTEF,POTEJ,POTEB2,POTEB	ENSG00000107796,ENSG00000143632,ENSG00000159251,ENSG00000163017,ENSG00000196834,ENSG00000075624,ENSG00000169067,ENSG00000184009,ENSG00000166351,ENSG00000183206,ENSG00000198062,ENSG00000222036,ENSG00000188219,ENSG00000188877,ENSG00000196604,ENSG00000222038,ENSG00000230031,ENSG00000233917
WBGene00000068	acy-1	1.49955	3.43549e-11	334 - 404	89 - 154	3.64667	1.00333	F17C8.1	ADCY9	ENSG00000162104
WBGene00000069	acy-2	0.559979	0.195255	41 - 50	20 - 35	0.536667	0.29	C10F3.3	ADCY2,ADCY4,ADCY7,ADCY1,ADCY5,ADCY8,ADCY6,ADCY3	ENSG00000078295,ENSG00000129467,ENSG00000121281,ENSG00000164742,ENSG00000173175,ENSG00000155897,ENSG00000174233,ENSG00000138031
WBGene00000070	acy-3	1.0215	8.36972e-05	311 - 428	107 - 224	3.68	1.41667	C44F1.5	ADCY2,ADCY1	ENSG00000078295,ENSG00000164742
WBGene00000071	acy-4	-0.186809	0.512088	143 - 169	124 - 173	1.82667	1.67333	T01C2.1	ADCY5,ADCY6,ADCY2,ADCY1,ADCY8,ADCY3,ADCY7,ADCY4	ENSG00000173175,ENSG00000174233,ENSG00000078295,ENSG00000164742,ENSG00000155897,ENSG00000138031,ENSG00000121281,ENSG00000129467
WBGene00000072	add-1	-0.302399	0.164957	218 - 233	219 - 256	3.49	3.59333	F39C12.2	ADD1,ADD2,ADD3	ENSG00000087274,ENSG00000075340,ENSG00000148700
WBGene00000073	add-2	0.188331	0.416933	481 - 629	352 - 593	15.9733	11.2433	F57F5.4	ADD2,ADD1,ADD3	ENSG00000075340,ENSG00000087274,ENSG00000148700
WBGene00000074	adm-2	0.243326	0.113086	879 - 1026	632 - 735	11.2633	7.7	C04A11.4	ADAM12,ADAM19,ADAM33,ADAM9,ADAM28,ADAM8,ADAM7,ADAM20,ADAM30,ADAM21,ADAM15,ADAM29,ADAM2,ADAM18,ADAM32	ENSG00000148848,ENSG00000135074,ENSG00000149451,ENSG00000168615,ENSG00000042980,ENSG00000151651,ENSG00000069206,ENSG00000134007,ENSG00000134249,ENSG00000139985,ENSG00000143537,ENSG00000168594,ENSG00000104755,ENSG00000168619,ENSG00000197140
WBGene00000075	adm-4	-0.23682	0.113875	583 - 612	555 - 713	10.04	9.64667	ZK154.7	ADAM17	ENSG00000151694
WBGene00000079	adr-1	0.191348	0.218852	2875 - 3001	1791 - 2843	73.7767	54.8467	H15N14.1	ADAD2,ADAD1	ENSG00000140955,ENSG00000164113
WBGene00000080	adr-2	-0.503925	0.000416769	2692 - 3372	3635 - 3664	71.02	81.57	T20H4.4	ADARB1,ADARB2,ADAR	ENSG00000197381,ENSG00000185736,ENSG00000160710
WBGene00000081	ads-1	0.746527	8.14228e-12	2804 - 2975	1379 - 1661	62.3733	29.8367	Y50D7A.7	AGPS	ENSG00000018510
WBGene00000082	adt-1	1.6136	1.26743e-05	133 - 171	17 - 66	1.20667	0.28	C02B4.1	ADAMTS2,ADAMTS14,ADAMTS3,ADAMTS13,ADAMTS6,ADAMTS17,ADAMTS18,ADAMTS16	ENSG00000087116,ENSG00000138316,ENSG00000156140,ENSG00000160323,ENSG00000049192,ENSG00000140470,ENSG00000140873,ENSG00000145536
WBGene00000083	adt-2	0.810629	8.54111e-09	876 - 912	393 - 520	9.61	4.28667	F08C6.1	ADAMTS2,ADAMTS14,ADAMTS3,ADAMTS13,ADAMTS6,ADAMTS17,ADAMTS18,ADAMTS16	ENSG00000087116,ENSG00000138316,ENSG00000156140,ENSG00000160323,ENSG00000049192,ENSG00000140470,ENSG00000140873,ENSG00000145536
WBGene00000084	aex-1	-0.772067	0.00146106	96 - 122	140 - 208	1.32667	1.89333	D2030.10
WBGene00000085	aex-2	-0.141622	0.813789	17 - 20	15 - 25	0.653333	0.57	T14B1.2
WBGene00000086	aex-3	0.835863	6.66656e-05	327 - 377	138 - 194	3.12	1.37667	C02H7.3	MADD	ENSG00000110514
WBGene00000088	aex-5	0.530818	0.00812761	364 - 462	248 - 259	9.56	5.24333	F32A7.6
WBGene00000089	aex-6	0.476964	0.0750055	135 - 170	82 - 123	6.78	3.93333	Y87G2A.4	RAB27A,RAB27B	ENSG00000069974,ENSG00000041353
WBGene00000090	age-1	-0.145512	0.368949	2707 - 2779	2490 - 2803	28.88	25.91	B0334.8	PIK3CA,PIK3CG,PIK3CB,PIK3CD	ENSG00000121879,ENSG00000105851,ENSG00000051382,ENSG00000171608
WBGene00000092	ags-3	0.317671	0.0512075	881 - 906	534 - 806	16.56	10.5933	F32A6.4	GPSM2,GPSM1	ENSG00000121957,ENSG00000160360
WBGene00000093	agt-1	-0.554764	0.00184843	718 - 891	966 - 1115	59.56	70.86	Y62E10A.5	MGMT	ENSG00000170430
WBGene00000094	agt-2	-0.696478	5.49993e-06	829 - 907	1178 - 1248	28.51	37.19	F09E5.13
WBGene00000095	aha-1	0.232592	0.2127	599 - 617	380 - 594	15.5633	10.7667	C25A1.11	ARNT,ARNT2	ENSG00000143437,ENSG00000172379
WBGene00000096	ahr-1	0.853912	0.0271704	54 - 68	26 - 26	1.27333	0.55	C41G7.5	AHR,AHRR,NPAS1	ENSG00000106546,ENSG00000063438,ENSG00000283321,ENSG00000130751
WBGene00000097	aip-1	-0.384777	0.0238047	1339 - 1805	1592 - 1816	58.03	61.3733	F58E10.4	ZFAND2B,ZFAND2A	ENSG00000158552,ENSG00000178381
WBGene00000098	air-1	-0.490381	0.00010217	5826 - 7035	7587 - 7881	190.163	215.933	K07C11.2	AURKA,AURKC,STK36,AURKB	ENSG00000087586,ENSG00000105146,ENSG00000163482,ENSG00000178999
WBGene00000099	air-2	-0.488844	2.03543e-05	2435 - 2680	2873 - 3516	96.89	109.943	B0207.4	AURKA,AURKC,AURKB	ENSG00000087586,ENSG00000105146,ENSG00000178999
WBGene00000100	ajm-1	0.863993	1.67405e-08	2891 - 3073	1089 - 1803	32.0167	13.4533	C25A11.4	C9orf172,NEFH,TCHH	ENSG00000232434,ENSG00000100285,ENSG00000159450
WBGene00000101	aka-1	-0.453915	0.00101517	8779 - 10102	9939 - 12485	88.95	98.9467	D1022.7	ZFYVE16,ZFYVE9,ZFYVE21	ENSG00000039319,ENSG00000157077,ENSG00000100711
WBGene00000102	akt-1	-0.475786	5.35039e-05	5688 - 6360	6818 - 7500	113.307	128.017	C12D8.10	AKT2,AKT1,AKT3,AKT3,SGK2,SGK3,SGK1,RPS6KB1,RPS6KB2	ENSG00000105221,ENSG00000142208,ENSG00000117020,ENSG00000275199,ENSG00000101049,ENSG00000104205,ENSG00000118515,ENSG00000108443,ENSG00000175634
WBGene00000103	akt-2	0.0443967	0.847888	487 - 579	340 - 554	10.47	8.19333	F28H6.1	AKT2,AKT1,AKT3,AKT3,SGK2,SGK3,SGK1,RPS6KB1,RPS6KB2	ENSG00000105221,ENSG00000142208,ENSG00000117020,ENSG00000275199,ENSG00000101049,ENSG00000104205,ENSG00000118515,ENSG00000108443,ENSG00000175634
WBGene00000105	alg-1	0.758084	0.000101937	2116 - 2565	884 - 1691	20.35	9.81	F48F7.1	AGO2,AGO1,AGO3,AGO4	ENSG00000123908,ENSG00000092847,ENSG00000126070,ENSG00000134698
WBGene00000106	alg-2	0.0580293	0.788732	1940 - 2293	1390 - 2368	26.6033	21.0467	T07D3.7	AGO2,AGO1,AGO3,AGO4	ENSG00000123908,ENSG00000092847,ENSG00000126070,ENSG00000134698
WBGene00000107	alh-1	-0.279998	0.0500489	7907 - 8714	8728 - 8985	217.133	214.33	F54D8.3	ALDH2,ALDH1B1,ALDH1A2,ALDH1A1,ALDH1A3	ENSG00000111275,ENSG00000137124,ENSG00000128918,ENSG00000165092,ENSG00000184254,ENSG00000257767
WBGene00000109	alh-3	0.283662	0.0315441	2822 - 3044	1860 - 2382	41.1167	27.4333	F36H1.6	ALDH1L1,ALDH1L2	ENSG00000144908,ENSG00000136010
WBGene00000110	alh-4	0.0334025	0.808946	4125 - 4428	3294 - 4288	101.977	80.82	T05H4.13	ALDH3A2,ALDH3A1,ALDH3B1,ALDH3B2	ENSG00000072210,ENSG00000108602,ENSG00000006534,ENSG00000132746
WBGene00000111	alh-5	0.949594	0.00184882	157 - 284	79 - 129	6.69333	2.67667	T08B1.3	ALDH3A2,ALDH3A1,ALDH3B1,ALDH3B2	ENSG00000072210,ENSG00000108602,ENSG00000006534,ENSG00000132746
WBGene00000112	alh-6	0.203872	0.275673	1679 - 2091	1390 - 1422	41.3	28.7767	F56D12.1	ALDH4A1	ENSG00000159423
WBGene00000113	alh-7	0.186997	0.276704	1168 - 1346	919 - 977	33.28	24.1733	F45H10.1	ALDH5A1	ENSG00000112294
WBGene00000114	alh-8	0.195184	0.255724	13714 - 15498	10526 - 11286	331.27	231.12	F13D12.4	ALDH6A1	ENSG00000119711
WBGene00000115	alh-9	0.194639	0.192621	4523 - 4784	2936 - 4516	102.517	73.27	F01F1.6	ALDH7A1	ENSG00000164904
WBGene00000116	alh-10	0.192988	0.404861	498 - 525	296 - 547	12.16	8.86	C54D1.4	ALDH8A1	ENSG00000118514
WBGene00000117	alh-11	-0.127494	0.502595	1210 - 1273	1128 - 1239	29.22	25.2633	F42G9.5	ALDH9A1	ENSG00000143149
WBGene00000118	alh-12	0.121055	0.537889	1590 - 1777	1126 - 1840	43.5	32.8167	Y69F12A.2	ALDH9A1	ENSG00000143149
WBGene00000120	aly-1	-0.689256	4.3816e-06	2140 - 2943	2935 - 4173	137.263	181.343	C01F6.5	ALYREF	ENSG00000183684
WBGene00000121	aly-2	-0.626187	2.29955e-05	6788 - 8073	9398 - 10377	402.883	502.29	F23B2.6	ALYREF	ENSG00000183684
WBGene00000122	aly-3	-0.195265	0.136358	4896 - 5381	5061 - 5392	220.413	204.897	M18.7	ALYREF	ENSG00000183684
WBGene00000123	ama-1	0.0758302	0.703737	7831 - 8930	5592 - 7816	55.4567	42.6533	F36A4.7	POLR2A,POLR3A	ENSG00000181222,ENSG00000148606
WBGene00000133	amt-1	0.774748	0.0373351	75 - 128	41 - 55	2.38333	1.04333	C05E11.4
WBGene00000134	amt-2	0.54286	0.379833	12 - 20	5 - 13	0.426667	0.173333	F49E11.3
WBGene00000135	amt-3	0.0773988	0.865247	50 - 52	38 - 47	0.833333	0.61	M195.3
WBGene00000136	amt-4	0.367444	0.170495	267 - 348	150 - 281	6.50333	4.06333	C05E11.5
WBGene00000137	amx-1	0.0397716	0.87006	630 - 646	450 - 751	9.48667	7.55667	R13G10.2	KDM1B	ENSG00000165097
WBGene00000138	amx-2	0.781225	0.00319977	334 - 387	115 - 268	5.83333	2.75667	B0019.1	MAOB,MAOA	ENSG00000069535,ENSG00000189221
WBGene00000139	amx-3	0.12212	0.782073	58 - 73	39 - 74	1.78667	1.30333	F25C8.2	SMOX,PAOX	ENSG00000088826,ENSG00000148832
WBGene00000140	anc-1	0.281062	0.0459593	1091 - 1306	815 - 925	10.66	7.41333	ZK973.6	SYNE1,SYNE2,SPTBN5,CLMN,CENPE,CENPF,GOLGA4,GOLGB1	ENSG00000131018,ENSG00000054654,ENSG00000137877,ENSG00000165959,ENSG00000138778,ENSG00000117724,ENSG00000144674,ENSG00000173230
WBGene00000142	aos-1	-0.441789	0.0011703	3265 - 3870	4147 - 4149	118.923	130.167	C08B6.9	SAE1	ENSG00000142230
WBGene00000143	apc-2	0.107569	0.434328	2014 - 2344	1547 - 2058	35.9	27.2	K06H7.6	ANAPC2	ENSG00000176248
WBGene00000144	apc-10	-0.688653	8.27457e-05	744 - 993	1118 - 1219	50.7167	66.8367	F15H10.3	ANAPC10	ENSG00000164162
WBGene00000145	apc-11	-0.33613	0.0197516	1069 - 1256	1139 - 1350	92.2567	95.15	F35G12.9	ANAPC11	ENSG00000141552
WBGene00000146	ape-1	-0.337435	0.00653297	6252 - 6656	6801 - 7193	105.733	109.58	F46F3.4	PPP1R13B,TP53BP2,PPP1R13L	ENSG00000088808,ENSG00000143514,ENSG00000104881
WBGene00000147	aph-1	-0.492368	0.00107833	1030 - 1310	1250 - 1477	43.2867	49.2833	VF36H2L.1	APH1A,APH1B	ENSG00000117362,ENSG00000138613
WBGene00000148	aph-2	0.0153126	0.930242	1589 - 1837	1268 - 1808	27.9267	22.58	ZC434.6	NCSTN	ENSG00000162736
WBGene00000149	apl-1	0.45665	0.000328376	4432 - 4784	2487 - 3326	66.2167	38.8433	C42D8.8	APLP2,APP,APLP1	ENSG00000084234,ENSG00000142192,ENSG00000105290
WBGene00000150	apm-1	0.386293	0.0166155	914 - 1113	559 - 861	25.26	15.53	F55A12.7	AP1M2,AP1M1	ENSG00000129354,ENSG00000072958
WBGene00000151	apn-1	-0.572681	6.77965e-05	2428 - 2912	3305 - 3450	84.3667	101.517	T05H10.2
WBGene00000155	app-1	-0.437408	0.000236127	6654 - 7071	7820 - 8388	132.723	145.207	W03G9.4	XPNPEP1,XPNPEP2	ENSG00000108039,ENSG00000122121
WBGene00000156	apr-1	-0.239635	0.0504785	4628 - 5295	4609 - 5692	51.2	49.0133	K04G2.8	APC,APC2	ENSG00000134982,ENSG00000115266,ENSG00000258864
WBGene00000157	aps-2	-0.156213	0.354449	662 - 810	628 - 805	58.4067	53	F02E8.3	AP2S1	ENSG00000042753
WBGene00000158	apg-1	-0.176657	0.190848	3208 - 3285	2962 - 3366	42.7267	38.78	Y105E8A.9	AP1G1,AP1G2,AP4E1	ENSG00000166747,ENSG00000213983,ENSG00000081014
WBGene00000159	aps-1	-0.546985	0.000386949	1474 - 1883	1988 - 2172	119.983	142.653	F29G9.3	AP1S2,AP1S1,AP1S3	ENSG00000182287,ENSG00000106367,ENSG00000152056,ENSG00000280852
WBGene00000160	apb-1	-0.0599858	0.728714	3579 - 3930	3228 - 3470	55.84	48.04	Y71H2B.10	AP1B1,AP2B1	ENSG00000100280,ENSG00000006125
WBGene00000161	apa-2	0.249586	0.158197	2206 - 2283	1281 - 2250	27.0433	18.6	T20B5.1	AP2A2,AP2A1	ENSG00000183020,ENSG00000196961
WBGene00000162	apd-3	-0.14972	0.407797	1934 - 2211	1803 - 2214	21.0667	18.92	W09G10.4	AP3D1	ENSG00000065000
WBGene00000163	apb-3	-0.269543	0.0427507	4647 - 5169	4688 - 5389	66.79	65.31	R11A5.1	AP3B2,AP3B1	ENSG00000103723,ENSG00000132842
WBGene00000164	apm-3	0.0373374	0.869225	655 - 781	492 - 812	20.0633	16.0033	F53H8.1	AP3M1,AP3M2	ENSG00000185009,ENSG00000070718
WBGene00000165	aps-3	-0.334864	0.0120309	1175 - 1398	1280 - 1523	77.43	78.4867	Y48G8AL.14	AP3S2,AP3S1,ARPIN	ENSG00000157823,ENSG00000177879,ENSG00000242498
WBGene00000166	apt-9	1.58856	0.000146122	56 - 64	9 - 18	1.04333	0.246667	W04G3.4	GGA1,GGA3,GGA2	ENSG00000100083,ENSG00000125447,ENSG00000103365
WBGene00000168	apx-1	-0.584625	0.000289876	3078 - 3139	3740 - 4338	54.3133	65.76	K08D9.3
WBGene00000169	aqp-1	1.26752	2.6741e-16	648 - 658	211 - 253	27.3233	8.82667	F32A5.5	AQP10,AQP9,AQP7,AQP3	ENSG00000143595,ENSG00000103569,ENSG00000165269,ENSG00000165272,ENSG00000259916,ENSG00000277737
WBGene00000170	aqp-2	1.42184	3.65811e-09	3911 - 5577	1023 - 2354	163.64	48.3667	C01G6.1	AQP10,AQP3,AQP9,AQP7,AQP5,AQP4	ENSG00000143595,ENSG00000165272,ENSG00000103569,ENSG00000165269,ENSG00000259916,ENSG00000277737,ENSG00000161798,ENSG00000171885
WBGene00000171	aqp-3	-0.725514	0.117	19 - 28	30 - 47	0.773333	1.11	Y69E1A.7	AQP10,AQP9,AQP7,AQP3,AQP5,AQP4	ENSG00000143595,ENSG00000103569,ENSG00000165269,ENSG00000165272,ENSG00000259916,ENSG00000277737,ENSG00000161798,ENSG00000171885
WBGene00000172	aqp-4	0.105953	0.66753	325 - 372	233 - 385	14.08	10.72	F40F9.9	AQP8	ENSG00000103375
WBGene00000174	aqp-6	-0.286757	0.566712	26 - 34	25 - 45	1.29333	1.46	C32C4.2	AQP8,AQP1	ENSG00000103375,ENSG00000240583
WBGene00000175	aqp-7	1.26155	2.33248e-23	2227 - 2537	764 - 1012	84.4833	28.3367	M02F4.8	AQP10,AQP3,AQP9,AQP7,AQP5,AQP4	ENSG00000143595,ENSG00000165272,ENSG00000103569,ENSG00000165269,ENSG00000259916,ENSG00000277737,ENSG00000161798,ENSG00000171885
WBGene00000176	aqp-8	0.945746	0.00213881	271 - 500	117 - 260	14.2933	5.93333	K02G10.7	AQP10,AQP3,AQP9,AQP7,AQP5,AQP4	ENSG00000143595,ENSG00000165272,ENSG00000103569,ENSG00000165269,ENSG00000259916,ENSG00000277737,ENSG00000161798,ENSG00000171885
WBGene00000177	aqp-9	0.299895	0.422977	71 - 94	44 - 79	4.46	2.86667	K07A1.16	AQP11,AQP12A,AQP12B	ENSG00000178301,ENSG00000184945,ENSG00000185176
WBGene00000178	aqp-10	0.53643	0.00609593	1284 - 1830	730 - 1245	62.94	35.1567	ZK1321.3	AQP11,AQP12A,AQP12B	ENSG00000178301,ENSG00000184945,ENSG00000185176
WBGene00000179	aqp-11	0.238349	0.170585	863 - 986	537 - 837	41.52	29.14	ZK525.2
WBGene00000180	arc-1	0.640257	0.00300522	429 - 484	200 - 354	10.9833	5.66333	ZK1320.6	TRIM23	ENSG00000113595
WBGene00000181	ard-1	-0.282861	0.079354	3971 - 4667	4320 - 4810	207.81	202.897	F01G4.2	HSD17B10	ENSG00000072506
WBGene00000182	arf-1.2	0.346522	0.0120317	6803 - 7353	4134 - 6315	239.013	153.653	B0336.2	ARF1,ARF3,ARF5,ARF4,TRIM23	ENSG00000143761,ENSG00000134287,ENSG00000004059,ENSG00000168374,ENSG00000272822,ENSG00000113595
WBGene00000183	arf-3	-0.2905	0.0206179	9991 - 10755	10476 - 11659	445.507	441.07	F57H12.1	ARF5,ARF4,ARF3,ARF1,TRIM23	ENSG00000004059,ENSG00000168374,ENSG00000134287,ENSG00000143761,ENSG00000113595,ENSG00000272822
WBGene00000184	arf-6	-0.630921	0.00056879	832 - 918	1071 - 1271	60.9967	75.9733	Y116A8C.12	ARF6	ENSG00000165527
WBGene00000185	arg-1	-0.687634	0.268309	4 - 5	9 - 10	0.123333	0.266667	F31A9.3
WBGene00000186	ark-1	-0.384791	0.0142921	1691 - 1807	1903 - 2124	19.46	20.5467	C01C7.1	MAST3	ENSG00000099308
WBGene00000187	arl-1	-0.664218	1.00894e-05	1342 - 1568	1913 - 2042	60.84	78.5933	F54C9.10	ARL1	ENSG00000120805
WBGene00000188	arl-3	1.54825	7.64489e-05	58 - 73	13 - 21	4.53333	1.10667	F19H8.3	ARL3	ENSG00000138175
WBGene00000189	arl-5	-0.55333	0.00340814	566 - 666	725 - 884	37.5767	44.9067	ZK632.8	ARL5A,ARL5B,ARL5C	ENSG00000162980,ENSG00000165997,ENSG00000141748,ENSG00000255863
WBGene00000190	arf-1.1	-0.359282	0.361482	41 - 72	53 - 89	4.02667	4.16333	F45E4.1	ARL4A,ARL11,ARL10,ARL4D,ARL14,ARL4C,ARL9	ENSG00000122644,ENSG00000152213,ENSG00000175414,ENSG00000175906,ENSG00000179674,ENSG00000188042,ENSG00000196503
WBGene00000191	arl-7	-0.0421668	0.932847	45 - 88	49 - 59	3.76667	3.21333	F20D1.5
WBGene00000192	arl-8	-0.558965	1.19291e-05	3676 - 4128	4873 - 4985	149.043	177.297	Y57G11C.13	ARL8A,ARL8B	ENSG00000143862,ENSG00000134108
WBGene00000193	arl-6	0.556647	0.317646	18 - 28	7 - 16	1.59667	0.83	C38D4.8	ARL6	ENSG00000113966
WBGene00000195	arr-1	0.316923	0.165858	593 - 619	326 - 617	16.0633	10.3733	F53H8.2	ARRB1,ARRB2,ARR3,SAG,SAG	ENSG00000137486,ENSG00000141480,ENSG00000120500,ENSG00000130561,ENSG00000281857
WBGene00000196	aars-1	-0.0287506	0.864401	1029 - 1202	916 - 1055	16.63	13.79	W02B12.6	AARS2	ENSG00000124608
WBGene00000197	aars-2	0.0555297	0.705974	11971 - 12686	8929 - 11581	141.777	110.823	F28H1.3	AARS,AARS2	ENSG00000090861,ENSG00000124608
WBGene00000198	art-1	-0.237083	0.0945817	5328 - 5821	5708 - 5805	206.097	196.227	C15F1.6	TECR,TECRL	ENSG00000099797,ENSG00000205678
WBGene00000199	arx-1	0.0145771	0.934424	2691 - 2857	2240 - 2468	67.5533	54.0433	Y71F9AL.16	ACTR3,ACTR3B,ACTR3C	ENSG00000115091,ENSG00000133627,ENSG00000106526
WBGene00000200	arx-2	-0.422777	0.000752508	3841 - 4275	4622 - 4778	95.0833	103.23	K07C5.1	ACTR2	ENSG00000138071,ENSG00000213985
WBGene00000201	arx-3	-0.0692213	0.701989	2268 - 2681	2146 - 2417	73.2533	61.8467	Y79H2A.6	ARPC1A,ARPC1B	ENSG00000241685,ENSG00000130429,ENSG00000284292
WBGene00000202	exos-4.2	-0.59827	0.000190599	1882 - 2444	2667 - 2966	106.347	130.75	Y6D11A.1	EXOSC6	ENSG00000223496
WBGene00000203	arx-5	-0.393935	0.0244043	1509 - 1890	1807 - 2062	106.533	112.51	Y37D8A.1	ARPC3	ENSG00000111229
WBGene00000204	arx-6	-0.281354	0.0552925	1677 - 2035	1754 - 2064	97.4267	94.5367	C35D10.16	ARPC4,ARPC4-TTLL3	ENSG00000241553,ENSG00000250151
WBGene00000205	arx-7	-0.436808	0.0150655	888 - 1083	1115 - 1287	59.36	64.5667	M01B12.3	ARPC5,ARPC5L	ENSG00000162704,ENSG00000136950
WBGene00000206	asb-1	-0.259154	0.0929313	7684 - 8918	8329 - 9036	342.15	329.033	F35G12.10	ATP5F1	ENSG00000116459
WBGene00000207	asb-2	0.419763	0.00271448	4000 - 4674	2513 - 3022	165.147	99.1467	F02E8.1	ATP5F1	ENSG00000116459
WBGene00000208	asc-1	-0.210596	0.240972	2001 - 2297	1974 - 2244	65.56	61.2567	Y53F4B.15	TRIP4	ENSG00000103671
WBGene00000209	asg-1	-0.468926	0.00336909	4593 - 5487	5887 - 6657	511.653	569.447	K07A12.3	ATP5L,ATP5L2	ENSG00000167283,ENSG00000249222
WBGene00000210	asg-2	0.840165	8.40806e-07	2433 - 2971	1001 - 1651	233.103	103.953	C53B7.4	ATP5L,ATP5L2	ENSG00000167283,ENSG00000249222
WBGene00000211	asm-1	-0.140512	0.601657	248 - 324	217 - 385	6.32667	5.78333	B0252.2	SMPD1	ENSG00000166311
WBGene00000212	asm-2	0.0550462	0.7827	454 - 542	367 - 456	10.0333	7.81	ZK455.4	SMPD1	ENSG00000166311
WBGene00000213	asm-3	-0.722709	0.00672059	158 - 210	245 - 336	4.18667	5.91667	W03G1.7	SMPD1	ENSG00000166311
WBGene00000214	asp-1	-0.320867	0.054534	31170 - 34903	33450 - 38523	1072.15	1077.86	Y39B6A.20	PGC,BACE2,BACE1,CTSE,PGA4,PGA3,PGA5	ENSG00000096088,ENSG00000182240,ENSG00000186318,ENSG00000196188,ENSG00000229183,ENSG00000229859,ENSG00000256713
WBGene00000215	asp-2	0.149549	0.3674	12805 - 14098	9994 - 10933	308.517	223.05	T18H9.2	PGC,BACE2,BACE1,CTSE,PGA4,PGA3,PGA5	ENSG00000096088,ENSG00000182240,ENSG00000186318,ENSG00000196188,ENSG00000229183,ENSG00000229859,ENSG00000256713
WBGene00000216	asp-3	-0.703088	2.15621e-10	13746 - 15008	19959 - 21749	412.5	545.35	H22K11.1	NAPSA,CTSE,CTSD,REN,BACE2,BACE1	ENSG00000131400,ENSG00000196188,ENSG00000117984,ENSG00000143839,ENSG00000182240,ENSG00000186318,ENSG00000250644,ENSG00000131401
WBGene00000217	asp-4	-0.607831	5.81972e-10	17517 - 20129	22623 - 28011	512.627	636.047	R12H7.2	CTSD,NAPSA,REN,BACE2,BACE1,CTSE	ENSG00000117984,ENSG00000250644,ENSG00000131400,ENSG00000143839,ENSG00000182240,ENSG00000186318,ENSG00000196188,ENSG00000131401
WBGene00000218	asp-5	-1.1045	1.06831e-13	9336 - 10414	17380 - 19446	330.573	579.27	F21F8.3	PGC,BACE2,BACE1,CTSE,PGA4,PGA3,PGA5	ENSG00000096088,ENSG00000182240,ENSG00000186318,ENSG00000196188,ENSG00000229183,ENSG00000229859,ENSG00000256713
WBGene00000219	asp-6	-0.64169	0.000194287	40516 - 43595	50626 - 62564	1435.22	1808.92	F21F8.7	PGC,BACE2,BACE1,CTSE,PGA4,PGA3,PGA5	ENSG00000096088,ENSG00000182240,ENSG00000186318,ENSG00000196188,ENSG00000229183,ENSG00000229859,ENSG00000256713
WBGene00000220	atf-2	1.06858	7.09619e-08	314 - 341	117 - 157	9.65667	3.68333	K08F8.2	NFIL3	ENSG00000165030
WBGene00000221	atf-5	0.228323	0.124014	1608 - 1824	1126 - 1604	71.76	49.85	T04C10.4
WBGene00000222	atf-6	0.162282	0.458687	533 - 663	372 - 634	9.92667	7.33333	F45E6.2	ATF6,ATF6B,ATF6B,ATF6B,ATF6B	ENSG00000118217,ENSG00000213676,ENSG00000168468,ENSG00000228628,ENSG00000234539
WBGene00000223	atf-7	-0.149745	0.166935	6773 - 7569	6160 - 7696	131.997	118.807	C07G2.2	ATF2,CREB5,ATF7	ENSG00000115966,ENSG00000146592,ENSG00000170653
WBGene00000224	atgp-1	0.649749	2.33779e-06	1139 - 1277	599 - 779	27.61	14.62	F26D10.9	SLC3A1,SLC3A2	ENSG00000138079,ENSG00000168003
WBGene00000225	atgp-2	0.389121	0.0705051	384 - 509	275 - 368	8.60667	5.16	C38C6.2	SLC3A1,SLC3A2	ENSG00000138079,ENSG00000168003
WBGene00000226	atl-1	-0.167472	0.241923	3565 - 4272	3314 - 4446	33.42	30.5867	T06E4.3	ATR,PRKDC	ENSG00000175054,ENSG00000253729
WBGene00000227	atm-1	0.555932	0.00401101	1633 - 1962	789 - 1307	10.4133	5.69	Y48G1BL.2	ATM	ENSG00000149311
WBGene00000228	atn-1	0.611535	5.45945e-06	3073 - 3147	1425 - 2121	39.7767	21.1767	W04D2.1	ACTN1,ACTN2,ACTN4,ACTN3,ACTN4	ENSG00000072110,ENSG00000077522,ENSG00000130402,ENSG00000248746,ENSG00000282844
WBGene00000229	atp-2	0.209653	0.15814	45421 - 53597	35512 - 38417	1030.04	718.263	C34E10.6	ATP5B	ENSG00000110955
WBGene00000230	atp-3	-0.136286	0.455452	13163 - 14872	12647 - 14139	691.303	608.517	F27C1.7	ATP5O	ENSG00000241837,ENSG00000249209
WBGene00000231	atx-2	-0.0983913	0.517597	7862 - 8081	6456 - 8019	105.32	91.52	D2045.1	ATXN2L,ATXN2	ENSG00000168488,ENSG00000204842
WBGene00000232	avr-14	0.707717	0.00638054	146 - 166	68 - 100	4.45333	2.08333	B0207.12	GLRA1,GLRA2,GLRA3,GLRA4,GLRB	ENSG00000145888,ENSG00000101958,ENSG00000145451,ENSG00000188828,ENSG00000109738
WBGene00000233	avr-15	0.538749	0.04695	250 - 314	120 - 250	8.06333	4.87667	R11G10.1	GLRA1,GLRA2,GLRA3,GLRA4,GLRB	ENSG00000145888,ENSG00000101958,ENSG00000145451,ENSG00000188828,ENSG00000109738
WBGene00000235	baf-1	-0.579479	2.72648e-05	3116 - 4167	4114 - 5043	282.897	344.823	B0464.7	BANF1,BANF2	ENSG00000175334,ENSG00000125888
WBGene00000236	bag-1	-0.380023	0.0172278	1538 - 1939	1834 - 2045	101.8	106.403	F57B10.11	BAG1	ENSG00000107262
WBGene00000237	bam-2	0.106912	0.544048	692 - 715	496 - 634	8.11667	6.16667	Y71F9AR.1
WBGene00000238	bar-1	0.625908	0.000997614	333 - 335	172 - 198	5	2.59667	C54D1.6	CTNNB1,JUP	ENSG00000168036,ENSG00000173801
WBGene00000239	bas-1	-0.144977	0.560064	322 - 340	265 - 446	8.15667	7.51667	C05D2.4	DDC	ENSG00000132437
WBGene00000240	pah-1	0.771692	3.28704e-07	1999 - 2176	897 - 1416	58.33	28.0033	K08F8.4	PAH	ENSG00000171759
WBGene00000241	bbs-1	1.49346	0.00394696	25 - 42	4 - 12	0.676667	0.12	Y105E8A.5	BBS1	ENSG00000174483,ENSG00000256349
WBGene00000242	bbs-2	1.12617	0.0265895	22 - 34	7 - 13	0.513333	0.15	F20D12.3	BBS2	ENSG00000125124
WBGene00000244	bbs-8	1.67802	0.000226637	37 - 56	7 - 11	1.07333	0.193333	T25F10.5	TTC8	ENSG00000165533
WBGene00000245	bca-1	0.259764	0.213907	322 - 399	217 - 317	14.1	9.40333	T13C5.5
WBGene00000246	bcc-1	0.497121	0.151977	122 - 138	56 - 123	2.42333	1.38333	M7.3	BICC1	ENSG00000122870
WBGene00000247	bec-1	-0.430764	0.00415803	1384 - 1828	1791 - 1876	48.5967	56.09	T19E7.3	BECN1,BECN2	ENSG00000126581,ENSG00000196289
WBGene00000248	ben-1	0.611096	3.37363e-05	1856 - 1952	874 - 1418	54.95	28.8533	C54C6.2	TUBB,TUBB3,TUBB6,TUBB2B,TUBB4B,TUBB4A,TUBB2A,TUBB,TUBB,TUBB,TUBB,TUBB,TUBB,TUBB,TUBB1	ENSG00000198211,ENSG00000196230,ENSG00000258947,ENSG00000176014,ENSG00000137285,ENSG00000188229,ENSG00000104833,ENSG00000137267,ENSG00000183311,ENSG00000224156,ENSG00000227739,ENSG00000229684,ENSG00000232421,ENSG00000232575,ENSG00000235067,ENSG00000101162,ENSG00000127589,ENSG00000159247,ENSG00000173213,ENSG00000173876
WBGene00000249	bir-1	-0.750123	2.40889e-07	1391 - 1871	2108 - 2510	128.843	176.543	T27F2.3	BIRC5	ENSG00000089685
WBGene00000250	bir-2	-0.651571	0.000160956	940 - 1081	1313 - 1522	41.24	52.1367	C50B8.2	BIRC5	ENSG00000089685
WBGene00000251	bli-1	1.57045	0.00542427	12 - 41	1 - 4	0.3	0.03	C09G5.6	SFTPD	ENSG00000133661
WBGene00000252	bli-2	2.57315	2.51382e-07	50 - 90	1 - 11	2.79667	0.153333	F59E12.12	MARCO	ENSG00000019169
WBGene00000253	bli-3	0.212385	0.318196	613 - 674	366 - 662	5.99667	4.18667	F56C11.1	DUOX2,DUOX1,NOX1,NOX3,CYBB	ENSG00000140279,ENSG00000137857,ENSG00000007952,ENSG00000074771,ENSG00000165168
WBGene00000254	bli-4	-0.470945	0.00110519	7177 - 7378	8266 - 9529	96.4433	107.61	K04F10.4	PCSK6,PCSK4,PCSK5,FURIN,PCSK1,PCSK7	ENSG00000140479,ENSG00000115257,ENSG00000099139,ENSG00000140564,ENSG00000175426,ENSG00000160613
WBGene00000255	bli-5	0.747149	0.181189	17 - 25	6 - 11	1.33	0.576667	F45G2.5
WBGene00000256	bli-6	2.2947	1.79017e-06	37 - 207	9 - 12	4.60667	0.396667	Y73B6BL.34	MARCO	ENSG00000019169
WBGene00000257	bmk-1	-0.276423	0.0176518	5043 - 5545	4720 - 6306	69.1667	68.2233	F23B12.8	KIF11	ENSG00000138160
WBGene00000259	bpl-1	-0.141754	0.40349	1316 - 1444	1232 - 1416	23.4767	21.33	F13H8.10	HLCS	ENSG00000159267
WBGene00000262	bra-1	-0.354719	0.0530777	329 - 408	348 - 494	18.1933	19.0333	F54B11.6	ZMYND11,ZMYND8	ENSG00000015171,ENSG00000101040
WBGene00000263	F23H11.5	-0.0603278	0.728418	4647 - 5630	4374 - 5049	601.807	508.173	F23H11.5
WBGene00000264	brc-1	-0.126065	0.442412	1198 - 1370	1185 - 1258	38.4467	32.9533	C36A4.8
WBGene00000265	brd-1	0.00918286	0.957713	1805 - 1906	1373 - 1940	31.6333	25.45	K04C2.4	BARD1	ENSG00000138376
WBGene00000266	bre-1	0.456496	0.00677846	794 - 958	444 - 704	26.6	16.0533	C53B4.7	GMDS	ENSG00000112699
WBGene00000267	bre-2	0.236035	0.535314	70 - 86	41 - 73	2.46333	1.65	Y39E4B.9	B3GALT2,B3GALNT1,B3GALT1,B3GALT5,B3GALT4	ENSG00000162630,ENSG00000169255,ENSG00000172318,ENSG00000183778,ENSG00000235863
WBGene00000268	bre-3	-0.509512	0.000306598	2684 - 2936	3351 - 3640	55.1733	63.3833	B0464.4
WBGene00000269	bre-4	-0.183503	0.335369	572 - 613	558 - 607	19.2267	17.08	Y73E7A.7	B4GALT3,B4GALT1,B4GALT2,B4GALT4,B4GALT6,B4GALT5	ENSG00000158850,ENSG00000086062,ENSG00000117411,ENSG00000121578,ENSG00000118276,ENSG00000158470
WBGene00000270	bre-5	0.374672	0.103958	401 - 481	220 - 409	10.3667	6.45667	T12G3.8	B3GALNT1,B3GALT4,B3GALT1	ENSG00000169255,ENSG00000235863,ENSG00000172318
WBGene00000271	brf-1	-0.297892	0.0257547	2468 - 2716	2654 - 2837	38.8067	38.55	F45E12.2	BRF1	ENSG00000185024
WBGene00000272	bro-1	1.37279	0.0029691	35 - 41	10 - 10	2.20667	0.606667	F56A3.5
WBGene00000273	brp-1	0.0960497	0.450195	12959 - 13815	9897 - 13320	312.373	237.987	Y79H2A.1
WBGene00000274	btf-1	-0.140046	0.445307	2640 - 2912	2361 - 2991	20.97	18.63	F15D4.1	BTAF1	ENSG00000095564
WBGene00000275	bub-1	-0.185834	0.108004	7674 - 8229	6947 - 8762	104.207	96.2433	R06C7.8	BUB1,BUB1B	ENSG00000169679,ENSG00000156970
WBGene00000276	byn-1	-0.0717059	0.644781	4749 - 5338	4497 - 4644	131.77	111.833	F57B9.5	BYSL	ENSG00000112578
WBGene00000277	cab-1	0.220939	0.060403	3033 - 3238	2169 - 2724	65.27	45.1267	C23H4.1	NPDC1	ENSG00000107281
WBGene00000279	cah-1	0.398727	0.258846	126 - 172	66 - 156	4.73333	2.90667	F54D8.4	CA10,CA11	ENSG00000154975,ENSG00000063180
WBGene00000280	cah-2	0.461951	0.315142	34 - 59	21 - 37	1.5	0.893333	D1022.8	CA10,CA11	ENSG00000154975,ENSG00000063180
WBGene00000281	cah-3	0.269663	0.156201	635 - 713	465 - 498	26.31	17.4933	K05G3.3	CA7,CA2,CA1,CA3,CA5B,CA5A,CA8,CA13,CA12,CA9,CA14,CA6,CA4	ENSG00000168748,ENSG00000104267,ENSG00000133742,ENSG00000164879,ENSG00000169239,ENSG00000174990,ENSG00000178538,ENSG00000185015,ENSG00000074410,ENSG00000107159,ENSG00000118298,ENSG00000131686,ENSG00000167434
WBGene00000282	cah-4	0.452615	3.73171e-05	2580 - 2909	1606 - 1987	116.923	69.0967	R01E6.3	CA5A,CA13	ENSG00000174990,ENSG00000185015
WBGene00000283	cah-5	0.110813	0.625985	435 - 527	360 - 395	17.6067	12.95	R173.1	CA3,CA7,CA2,CA1,CA5B,CA5A,CA8,CA13,CA12,CA9,CA14,CA6,CA4	ENSG00000164879,ENSG00000168748,ENSG00000104267,ENSG00000133742,ENSG00000169239,ENSG00000174990,ENSG00000178538,ENSG00000185015,ENSG00000074410,ENSG00000107159,ENSG00000118298,ENSG00000131686,ENSG00000167434
WBGene00000284	cah-6	1.27489	0.00138348	73 - 107	15 - 46	3.55	1.03333	T28F2.3
WBGene00000285	cal-1	0.348764	0.227318	144 - 173	78 - 123	8.75667	5.51	C13C12.1
WBGene00000286	cal-2	0.893259	0.000207345	180 - 206	72 - 109	11.1267	4.79333	C18E9.1
WBGene00000287	cal-3	1.00567	0.0433578	38 - 54	8 - 30	2.66667	0.853333	M02B7.6
WBGene00000288	cal-4	1.29716	1.37149e-05	124 - 140	34 - 56	5.11333	1.78	T07G12.1
WBGene00000289	cam-1	-0.188717	0.124439	2862 - 2998	2523 - 3505	38.2567	36.4	C01G6.8	ROR2,ROR1,NTRK3,NTRK2,NTRK1	ENSG00000169071,ENSG00000185483,ENSG00000140538,ENSG00000148053,ENSG00000198400
WBGene00000292	cap-1	-0.274595	0.0334544	3802 - 4596	4255 - 4547	140.47	137.673	D2024.6	CAPZA1,CAPZA2,CAPZA3	ENSG00000116489,ENSG00000198898,ENSG00000177938
WBGene00000293	cap-2	-0.195544	0.155819	4597 - 5356	4824 - 5091	142.1	131.707	M106.5	CAPZB	ENSG00000077549
WBGene00000294	cas-1	0.132031	0.433238	2098 - 2194	1668 - 1717	46.19	35.76	F41G4.2	CAP1,CAP2	ENSG00000131236,ENSG00000112186
WBGene00000295	cat-1	1.07217	0.0261952	29 - 40	7 - 17	0.783333	0.26	W01C8.6	SLC18A2,SLC18A1	ENSG00000165646,ENSG00000036565
WBGene00000296	cat-2	0.481711	0.382493	22 - 32	10 - 23	0.586667	0.336667	B0432.5	TH	ENSG00000180176
WBGene00000298	cat-4	-0.174522	0.561262	639 - 746	465 - 1135	32.8433	30.67	F32G8.6	GCH1	ENSG00000131979
WBGene00000301	cav-1	0.176914	0.705649	10328 - 13785	5441 - 15933	597.41	439.227	T13F2.8	CAV1,CAV3,CAV2	ENSG00000105974,ENSG00000182533,ENSG00000105971
WBGene00000302	cav-2	0.790983	0.0146325	94 - 153	43 - 68	4.12333	2.54	C56A3.7	CAV2,CAV1,CAV3	ENSG00000105971,ENSG00000105974,ENSG00000182533
WBGene00000366	cbp-1	0.188667	0.357019	6639 - 7884	3991 - 6844	41.7667	29.93	R10E11.1	CREBBP,EP300	ENSG00000005339,ENSG00000100393
WBGene00000367	cca-1	0.536895	0.0242103	316 - 401	153 - 268	2.22667	1.19	C54D2.5	CACNA1G,CACNA1I,CACNA1H	ENSG00000006283,ENSG00000100346,ENSG00000196557
WBGene00000368	ccb-1	0.629485	0.00547821	259 - 310	153 - 167	5.81	2.93	T28F2.5	CACNB4,CACNB1,CACNB2,CACNB3	ENSG00000182389,ENSG00000067191,ENSG00000165995,ENSG00000167535,ENSG00000283228
WBGene00000369	ccf-1	-0.0887986	0.577812	2910 - 3401	2801 - 3068	100.173	86.73	Y56A3A.20	CNOT7,CNOT8	ENSG00000198791,ENSG00000155508
WBGene00000370	ccg-1	0.863836	1.02751e-07	3035 - 3561	1257 - 2165	163.93	72.7333	Y73F8A.6
WBGene00000371	cco-1	-0.194222	0.213436	8006 - 9627	8513 - 9295	735.523	675.963	F26E4.9	COX5B	ENSG00000135940
WBGene00000372	cyp-13A7	-0.393847	0.546929	7 - 9	5 - 16	0.193333	0.226667	T10B9.10	CYP3A43,CYP3A5,CYP3A4,CYP3A7,TBXAS1,CYP3A7-CYP3A51P,CYP4V2,CYP4B1,CYP4A22,CYP4F11,CYP4F22,CYP4F2,CYP4Z1,CYP4F12,CYP4X1,CYP4F8,CYP4F3,CYP4A11	ENSG00000021461,ENSG00000106258,ENSG00000160868,ENSG00000160870,ENSG00000059377,ENSG00000282301,ENSG00000145476,ENSG00000142973,ENSG00000162365,ENSG00000171903,ENSG00000171954,ENSG00000186115,ENSG00000186160,ENSG00000186204,ENSG00000186377,ENSG00000186526,ENSG00000186529,ENSG00000187048
WBGene00000373	cyp-14A5	0.0235431	0.927807	1163 - 1677	956 - 1653	35.5833	28.6	F08F3.7	CYP2J2,CYP2U1,CYP2D6,CYP2R1,CYP2D7,CYP2W1,CYP2D6,CYP2C18,CYP2C9,CYP2C8,CYP2C19,CYP2B6	ENSG00000134716,ENSG00000155016,ENSG00000100197,ENSG00000186104,ENSG00000205702,ENSG00000073067,ENSG00000275211,ENSG00000108242,ENSG00000138109,ENSG00000138115,ENSG00000165841,ENSG00000197408
WBGene00000374	cyp-31A1	0.617368	0.00022232	501 - 558	255 - 370	14.1667	7.13333	C01F6.3
WBGene00000375	cyp-44A1	-0.430464	0.00138802	1403 - 1628	1618 - 1830	34.2067	36.7267	ZK177.5	CYP24A1,CYP27A1,CYP27B1,CYP11A1,CYP27C1,CYP11B1,CYP11B2	ENSG00000019186,ENSG00000135929,ENSG00000111012,ENSG00000140459,ENSG00000186684,ENSG00000160882,ENSG00000179142
WBGene00000376	ccr-4	-0.268217	0.0456295	10268 - 10479	9841 - 11624	165.847	157.453	ZC518.3	CNOT6L,CNOT6	ENSG00000138767,ENSG00000113300
WBGene00000377	cct-1	-0.318074	0.0450567	13034 - 14095	13870 - 15309	297.91	299.38	T05C12.7	TCP1	ENSG00000120438
WBGene00000378	cct-2	-0.0790695	0.641507	9972 - 10680	9250 - 9570	216.267	183.783	T21B10.7	CCT2	ENSG00000166226
WBGene00000379	cct-4	-0.190595	0.264376	11311 - 12375	10834 - 12128	261.597	239.737	K01C8.10	CCT4	ENSG00000115484
WBGene00000380	cct-5	-0.0197511	0.884369	18190 - 20442	15969 - 18737	424.097	352.207	C07G2.3	CCT5	ENSG00000150753
WBGene00000381	cct-6	-0.0508447	0.731145	11093 - 11720	9928 - 10669	244.19	204.253	F01F1.8	CCT6A,CCT6B	ENSG00000146731,ENSG00000132141
WBGene00000382	cdc-6	-0.562476	1.88703e-06	3408 - 3826	4459 - 4729	82.3867	98.9033	C43E11.10	CDC6,ORC1	ENSG00000094804,ENSG00000085840
WBGene00000383	cdc-14	-0.357156	0.00129677	5962 - 6326	6447 - 7249	87.3033	89.07	C17G10.4	CDC14A,CDC14B,DUSP23	ENSG00000079335,ENSG00000081377,ENSG00000158716,ENSG00000225705
WBGene00000386	cdc-25.1	-0.345761	0.0151181	5857 - 6201	6405 - 6953	104.99	108.4	K06A5.7	CDC25B,CDC25C,CDC25A	ENSG00000101224,ENSG00000158402,ENSG00000164045
WBGene00000387	cdc-25.2	0.00447123	0.981789	1493 - 1785	1305 - 1571	31.7433	25.62	F16B4.8	CDC25B,CDC25C,CDC25A	ENSG00000101224,ENSG00000158402,ENSG00000164045
WBGene00000388	cdc-25.3	-0.667163	5.41046e-08	910 - 1082	1274 - 1502	37.6167	48.6567	ZK637.11	CDC25B,CDC25C,CDC25A	ENSG00000101224,ENSG00000158402,ENSG00000164045
WBGene00000390	cdc-42	-0.414356	0.000465005	4011 - 4913	4788 - 5414	168.56	180.707	R07G3.1	CDC42	ENSG00000070831
WBGene00000391	cdd-1	0.837203	0.00206188	226 - 302	85 - 166	11.71	5.15667	C47D2.2	CDA	ENSG00000158825
WBGene00000392	cdd-2	-0.299463	0.0434994	1022 - 1245	1114 - 1256	75.6533	75.07	F49E8.4	CDA	ENSG00000158825
WBGene00000393	cdf-1	-0.0510293	0.781801	829 - 882	645 - 965	16.6667	14.18	C15B12.7	SLC30A1,SLC30A10,SLC30A4,SLC30A2	ENSG00000170385,ENSG00000196660,ENSG00000104154,ENSG00000158014
WBGene00000395	cdh-3	0.377211	0.0893894	483 - 591	257 - 440	2.00667	1.25	ZK112.7	PCDH15	ENSG00000150275
WBGene00000396	cdh-4	0.713653	0.000168502	3527 - 4313	1462 - 2777	17.6933	8.85	F25F2.2	FAT1,FAT3,FAT2,FAT3,DCHS1,DCHS2,FAT4,CDH23	ENSG00000083857,ENSG00000165323,ENSG00000086570,ENSG00000282908,ENSG00000166341,ENSG00000197410,ENSG00000196159,ENSG00000107736
WBGene00000397	cdh-5	0.878799	0.00281984	135 - 212	65 - 94	1.50667	0.63	F08B4.2	PCDH15	ENSG00000150275
WBGene00000399	cdh-7	1.93198	4.30313e-07	101 - 287	25 - 50	1.85667	0.323333	R05H10.6	PCDH15,PCDHB5,PCDHGA8,PCDHGB2,PCDHGB7,PCDHGA3,PCDHGB3	ENSG00000150275,ENSG00000113209,ENSG00000253767,ENSG00000253910,ENSG00000254122,ENSG00000254245,ENSG00000262209
WBGene00000401	cdh-9	1.53252	1.68951e-07	124 - 143	32 - 46	2.58	0.646667	F59C12.1	PCDH15,PCDHB5,PCDHGA8,PCDHGB2,PCDHGB7,PCDHGA3,PCDHGB3,CDHR1,PCDH1,PCDH7,PCDH9,PCDH20,PCDHB4,PCDHA6,PCDHGA2,PCDHB2,PCDHB3,PCDHB6,PCDHB7,PCDHB15,PCDH12,PCDH17,PCDHB8,PCDHB10,PCDHB14,PCDHB12,PCDH8,PCDH10,PCDH19,PCDHB1,PCDHB9,PCDHB13,PCDH18,PCDHB11,PCDHGA1,PCDHA9,PCDHA8,PCDHA7,PCDHA5,PCDHA4,PCDHA2,PCDHA1,PCDHA13,PCDHGC3,PCDHGC5,PCDHGC4,PCDHAC2,PCDHAC1,PCDHA11,PCDHA10,PCDHA12,PCDHGA12,PCDHGB6,PCDHGA5,…	ENSG00000150275,ENSG00000113209,ENSG00000253767,ENSG00000253910,ENSG00000254122,ENSG00000254245,ENSG00000262209,ENSG00000148600,ENSG00000156453,ENSG00000169851,ENSG00000184226,ENSG00000280165,ENSG00000081818,ENSG00000081842,ENSG00000081853,ENSG00000112852,ENSG00000113205,ENSG00000113211,ENSG00000113212,ENSG00000113248,ENSG00000113555,ENSG00000118946,ENSG00000120322,ENSG00000120324,ENSG00000120327…
WBGene00000402	cdh-10	1.43167	4.63935e-05	116 - 245	41 - 79	1.48333	0.396667	C45G7.5	PCDH15	ENSG00000150275
WBGene00000403	casy-1	0.899997	1.89556e-09	1808 - 2087	749 - 1119	25.66	11.2567	B0034.3	CLSTN1,CLSTN3,CLSTN2	ENSG00000171603,ENSG00000139182,ENSG00000158258
WBGene00000405	cdk-1	-0.621521	1.04803e-05	6620 - 8164	9426 - 9782	247.4	308.287	T05G5.3	CDK1,CDK5,CDK2	ENSG00000170312,ENSG00000164885,ENSG00000123374
WBGene00000406	cdk-4	-0.431407	0.0111752	324 - 402	384 - 516	12.2267	13.3433	F18H3.5	CDK6,CDK4	ENSG00000105810,ENSG00000135446
WBGene00000407	cdk-5	-0.697418	2.06006e-05	1473 - 1616	2016 - 2355	57.52	75.4033	T27E9.3	CDK5,CDK1,CDK2	ENSG00000164885,ENSG00000170312,ENSG00000123374
WBGene00000408	cdk-7	-0.585047	5.01649e-05	2587 - 3147	3571 - 3718	88.6467	107.9	Y39G10AL.3	CDK7,CDK7	ENSG00000134058,ENSG00000277273
WBGene00000409	cdk-8	-0.416039	0.000183135	2029 - 2338	2366 - 2761	41.4567	44.2467	F39H11.3	CDK8,CDK19	ENSG00000132964,ENSG00000155111
WBGene00000410	cdk-9	-0.013243	0.944632	1027 - 1111	909 - 991	26.6267	21.8833	H25P06.2	CDK9	ENSG00000136807
WBGene00000411	cdl-1	-0.400097	0.000109736	7663 - 8080	8576 - 10053	201.293	215.577	R06F6.1	SLBP	ENSG00000163950
WBGene00000412	cdr-1	0.0626554	0.907284	30 - 47	29 - 36	1.74	1.28	F35E8.11	FAXC	ENSG00000146267
WBGene00000413	cdt-1	-0.139793	0.376914	2421 - 2530	1935 - 3053	38.65	34.7967	Y54E10A.15	CDT1	ENSG00000167513
WBGene00000414	cec-1	0.511304	0.000617444	1027 - 1110	571 - 841	35.2167	20.0433	ZK1236.2	CBX2,VCX3B	ENSG00000173894,ENSG00000205642
WBGene00000415	ced-1	-0.351347	0.0307532	3102 - 3402	3399 - 3995	36.78	37.89	Y47H9C.4	MEGF10,MEGF11,PEAR1,SCARF1,SCARF2,MEGF6	ENSG00000145794,ENSG00000157890,ENSG00000187800,ENSG00000074660,ENSG00000244486,ENSG00000162591
WBGene00000416	ced-2	-0.617778	0.000400869	1897 - 2057	2376 - 2883	75.5133	94.1167	Y41D4B.13	CRK,CRKL	ENSG00000167193,ENSG00000099942
WBGene00000417	ced-3	-0.452598	0.00168735	5073 - 5200	5763 - 6612	100.77	108.383	C48D1.2	CASP2,CASP3,CASP7,CASP14,CASP9,CASP1,CASP5,CASP4,CASP12,CASP8	ENSG00000106144,ENSG00000164305,ENSG00000165806,ENSG00000105141,ENSG00000132906,ENSG00000137752,ENSG00000137757,ENSG00000196954,ENSG00000204403,ENSG00000064012
WBGene00000418	ced-4	-0.362062	0.00984649	1459 - 1958	1753 - 2122	35.6967	37.0567	C35D10.9
WBGene00000419	ced-5	-0.430714	0.00501523	3131 - 3731	3568 - 4387	23.4967	25.7967	C02F4.1	DOCK1,DOCK3,DOCK4,DOCK2,DOCK5	ENSG00000150760,ENSG00000088538,ENSG00000128512,ENSG00000134516,ENSG00000147459
WBGene00000420	ced-6	-0.306045	0.0891549	1893 - 2050	1933 - 2218	38.02	38.1133	F56D2.7	GULP1	ENSG00000144366
WBGene00000421	ced-7	0.112989	0.500211	5532 - 6136	3745 - 5466	40.47	30.41	C48B4.4	ABCA8,ABCA9,ABCA6,ABCA10,ABCA5,ABCA7,ABCA2,ABCA12,ABCA1,ABCA13,ABCA4,ABCA3	ENSG00000141338,ENSG00000154258,ENSG00000154262,ENSG00000154263,ENSG00000154265,ENSG00000064687,ENSG00000107331,ENSG00000144452,ENSG00000165029,ENSG00000179869,ENSG00000198691,ENSG00000167972
WBGene00000422	ced-8	0.115166	0.732436	178 - 212	116 - 233	4.90333	3.72	F08F1.5	XKR6,XKR8,XKR4,XKR7,XKR9,XKR5	ENSG00000171044,ENSG00000158156,ENSG00000206579,ENSG00000260903,ENSG00000221947,ENSG00000275591
WBGene00000423	ced-9	-0.287317	0.0193909	2112 - 2400	2222 - 2548	71.72	70.75	T07C4.8	BCL2L1	ENSG00000171552
WBGene00000424	ced-10	-0.195663	0.139242	1324 - 1386	1241 - 1461	45.5733	41.1333	C09G12.8	RAC3,RAC2,RAC1,RHOG	ENSG00000169750,ENSG00000128340,ENSG00000136238,ENSG00000177105
WBGene00000425	ced-11	0.809463	0.012989	626 - 716	173 - 599	6.07667	2.77	ZK512.3	TRPM5,TRPM4,TRPM2,TRPM8	ENSG00000070985,ENSG00000130529,ENSG00000142185,ENSG00000144481
WBGene00000426	ced-12	-0.44434	0.000829208	2614 - 3061	3245 - 3363	47.7767	52.3767	Y106G6E.5	ELMO2,ELMO1,ELMO3	ENSG00000062598,ENSG00000155849,ENSG00000102890
WBGene00000427	ced-13	-0.178807	0.803379	4 - 5	4 - 8	0.496667	0.583333	R09F10.9
WBGene00000428	ceh-1	-0.223161	0.743052	6 - 13	7 - 12	0.683333	0.56	F16H11.4	NKX1-1,NKX1-2	ENSG00000235608,ENSG00000229544
WBGene00000429	ceh-2	0.322755	0.614289	12 - 21	5 - 18	0.78	0.453333	C27A12.5	EMX2,EMX1,VAX2,VAX1,NOTO,NKX6-3	ENSG00000170370,ENSG00000135638,ENSG00000116035,ENSG00000148704,ENSG00000214513,ENSG00000165066
WBGene00000430	ceh-5	-0.132821	0.80894	23 - 31	20 - 37	2.2	2.08667	C16C2.1	VAX1,VAX2,NOTO	ENSG00000148704,ENSG00000116035,ENSG00000214513
WBGene00000431	ceh-6	1.476	2.94376e-05	75 - 87	18 - 27	2.07667	0.523333	K02B12.1	POU3F2,POU3F3,POU3F4,POU1F1,POU3F1,POU2F2,POU2F1	ENSG00000184486,ENSG00000198914,ENSG00000196767,ENSG00000064835,ENSG00000185668,ENSG00000028277,ENSG00000143190
WBGene00000433	ceh-8	0.213595	0.756864	6 - 14	5 - 10	0.436667	0.256667	ZK265.4	RAX,RAX2,ARX	ENSG00000134438,ENSG00000173976,ENSG00000004848
WBGene00000434	ceh-9	0.547396	0.399224	6 - 8	2 - 3	0.49	0.21	Y65B4BR.9
WBGene00000435	ceh-10	1.01008	0.0444501	30 - 44	6 - 22	1.32667	0.383333	W03A3.1	VSX2,VSX1,HESX1	ENSG00000119614,ENSG00000100987,ENSG00000163666
WBGene00000437	ceh-13	0.474231	0.148233	321 - 349	132 - 359	12.4233	7.33333	R13A5.5	HOXA1,HOXB1,HOXD1	ENSG00000105991,ENSG00000120094,ENSG00000128645
WBGene00000438	ceh-14	0.743291	0.0730502	54 - 79	24 - 36	2.24	1.09333	F46C8.5	LHX3,LHX4	ENSG00000107187,ENSG00000121454
WBGene00000439	ceh-16	0.074617	0.879016	63 - 81	41 - 100	4.70333	3.50667	C13G5.1	EN1,EN2,HOXD4,HOXB4,HOXA4,HOXC4,HOXA6,HOXB6,GBX1,HOXD8	ENSG00000163064,ENSG00000164778,ENSG00000170166,ENSG00000182742,ENSG00000197576,ENSG00000198353,ENSG00000106006,ENSG00000108511,ENSG00000164900,ENSG00000175879
WBGene00000440	ceh-17	1.40124	0.0156441	12 - 13	1 - 2	0.79	0.08	D1007.1	PHOX2B,PHOX2A,ARX,RAX,RAX2,ALX4,PRRX1,ALX3,PRRX2,SHOX2,OTP,ALX1,SHOX	ENSG00000109132,ENSG00000165462,ENSG00000004848,ENSG00000134438,ENSG00000173976,ENSG00000052850,ENSG00000116132,ENSG00000156150,ENSG00000167157,ENSG00000168779,ENSG00000171540,ENSG00000180318,ENSG00000185960
WBGene00000441	ceh-18	0.770559	0.000165303	346 - 367	150 - 242	5.91667	2.81667	ZC64.3	POU2F3,POU3F1,POU2F2,POU2F1	ENSG00000137709,ENSG00000185668,ENSG00000028277,ENSG00000143190
WBGene00000442	ceh-19	0.00615496	0.992203	16 - 22	6 - 25	1.35	1.20333	F20D12.6	NKX6-3	ENSG00000165066
WBGene00000443	ceh-20	0.28735	0.207703	1107 - 1308	642 - 1267	37.9533	25.5333	F31E3.1	PBX1,PBX3,PBX2,PBX4,PBX2,PBX2,PBX2,PBX2,PBX2,PBX2	ENSG00000185630,ENSG00000167081,ENSG00000204304,ENSG00000105717,ENSG00000206315,ENSG00000224952,ENSG00000225987,ENSG00000232005,ENSG00000236353,ENSG00000237344
WBGene00000444	ceh-21	-0.327854	0.05454	502 - 568	570 - 641	7.83667	7.94333	T26C11.6
WBGene00000445	ceh-22	2.02856	3.84134e-05	29 - 43	3 - 7	1.21667	0.143333	F29F11.5	NKX2-8,NKX2-5,NKX2-2	ENSG00000136327,ENSG00000183072,ENSG00000125820
WBGene00000446	ceh-23	0.26967	0.669118	11 - 28	8 - 18	0.813333	0.466667	ZK652.5	VAX2,EMX1,VAX1,EMX2,NOTO	ENSG00000116035,ENSG00000135638,ENSG00000148704,ENSG00000170370,ENSG00000214513
WBGene00000447	ceh-24	0.854727	0.126944	16 - 24	6 - 8	0.876667	0.293333	F55B12.1	NKX2-1,NKX2-4,NKX2-6,NKX2-2	ENSG00000136352,ENSG00000125816,ENSG00000180053,ENSG00000125820
WBGene00000448	pros-1	2.08722	1.43335e-12	160 - 185	23 - 46	3.02667	0.496667	K12H4.1	PROX1,PROX2	ENSG00000117707,ENSG00000119608
WBGene00000449	ceh-27	1.03	0.0154614	140 - 153	28 - 116	6.91	2.82333	F46F3.1	NKX2-4,NKX2-1,GSX1,GSX2	ENSG00000125816,ENSG00000136352,ENSG00000169840,ENSG00000180613
WBGene00000451	ceh-30	-0.250621	0.634164	19 - 33	27 - 30	1.05	0.97	C33D12.7	BARHL1,BARHL2	ENSG00000125492,ENSG00000143032
WBGene00000452	ceh-31	0.605499	0.285808	17 - 28	8 - 17	0.82	0.37	C33D12.1	BARHL2,BARHL1	ENSG00000143032,ENSG00000125492
WBGene00000453	ceh-32	0.908758	0.00348425	301 - 331	91 - 248	6.86667	2.94	W05E10.3	SIX3,SIX6,SIX1,SIX2	ENSG00000138083,ENSG00000184302,ENSG00000126778,ENSG00000170577
WBGene00000454	ceh-33	0.643849	0.310197	9 - 10	0 - 6	0.48	0.136667	C10G8.7	SIX1,SIX2,SIX3,SIX6,SIX4	ENSG00000126778,ENSG00000170577,ENSG00000138083,ENSG00000184302,ENSG00000100625
WBGene00000455	ceh-34	1.49483	7.72499e-05	67 - 86	13 - 25	2.83333	0.72	C10G8.6	SIX1,SIX2	ENSG00000126778,ENSG00000170577
WBGene00000457	ceh-36	0.868727	0.05454	89 - 113	19 - 88	4.78	1.95	C37E2.4	CRX,OTX1,OTX2,MIXL1,SEBOX	ENSG00000105392,ENSG00000115507,ENSG00000165588,ENSG00000185155,ENSG00000274529
WBGene00000458	ceh-37	0.485939	0.0937537	247 - 316	120 - 275	8.71333	5.09667	C37E2.5	CRX,OTX1,OTX2	ENSG00000105392,ENSG00000115507,ENSG00000165588
WBGene00000459	ceh-38	-0.315315	0.0150743	4474 - 4557	4248 - 5323	60.3867	60.2967	F22D3.1
WBGene00000460	ceh-39	-0.129033	0.524269	616 - 711	554 - 819	17.17	15.5367	T26C11.7
WBGene00000461	ceh-40	-0.13946	0.591365	368 - 424	306 - 562	15.3567	14.0133	F17A2.5	PBX4,PBX3,PBX1,PBX2	ENSG00000105717,ENSG00000167081,ENSG00000185630,ENSG00000204304
WBGene00000462	ceh-41	-0.338573	0.087448	267 - 304	273 - 354	8.84333	8.95333	T26C11.5
WBGene00000463	ceh-43	0.53307	0.0281873	539 - 626	255 - 522	21.42	12.2833	C28A5.4	DLX5,DLX6,DLX3,DLX2,DLX1,DLX4	ENSG00000105880,ENSG00000006377,ENSG00000064195,ENSG00000115844,ENSG00000144355,ENSG00000108813
WBGene00000464	ceh-44	0.118469	0.405871	3158 - 3228	2179 - 2939	49.8333	38.8167	Y54F10AM.4	CUX2,CUX1,HMMR	ENSG00000111249,ENSG00000257923,ENSG00000072571
WBGene00000465	cpg-1	-0.654775	8.97407e-06	61596 - 66858	83244 - 91422	1421.92	1820.29	C07G2.1
WBGene00000466	cel-1	-0.0397609	0.795118	2396 - 2878	2080 - 2792	47.6533	40.1433	C03D6.3	RNGTT	ENSG00000111880
WBGene00000467	cep-1	-0.410634	0.000473673	2025 - 2459	2308 - 2867	60.52	64.9533	F52B5.5
WBGene00000468	ces-1	1.06394	0.0586907	17 - 24	3 - 11	0.766667	0.183333	F43G9.11	SCRT2,SCRT1,GFI1B	ENSG00000215397,ENSG00000261678,ENSG00000165702
WBGene00000469	ces-2	1.21442	1.11628e-05	127 - 165	43 - 60	6.21667	1.96667	ZK909.4	HLF,DBP,TEF	ENSG00000108924,ENSG00000105516,ENSG00000167074
WBGene00000472	cey-1	0.0895448	0.563908	11319 - 12796	9558 - 10076	386.853	294.107	F33A8.3	YBX3,YBX1,YBX2	ENSG00000060138,ENSG00000065978,ENSG00000006047,ENSG00000231167
WBGene00000473	cey-2	-0.412437	0.0128056	43569 - 49243	49948 - 58620	1993.51	2132.57	F46F11.2	YBX2,YBX3,YBX1	ENSG00000006047,ENSG00000060138,ENSG00000065978
WBGene00000474	cey-3	-0.600025	0.000289876	17406 - 20669	22724 - 27202	815.517	995.92	M01E11.5	YBX3,YBX1,YBX2	ENSG00000060138,ENSG00000065978,ENSG00000006047,ENSG00000231167
WBGene00000475	cey-4	-0.476959	0.00916296	15742 - 18839	18365 - 22484	607.97	682.987	Y39A1C.3	YBX2,YBX3,YBX1	ENSG00000006047,ENSG00000060138,ENSG00000065978
WBGene00000476	cfi-1	1.76451	1.68767e-08	159 - 179	24 - 61	4.62	0.963333	T23D8.8	ARID3A,ARID3B,ARID3C	ENSG00000116017,ENSG00000179361,ENSG00000205143
WBGene00000477	cft-1	1.21424	0.00152825	78 - 103	17 - 47	0.956667	0.283333	C18C4.2	ABCC2,ABCC6,ABCC1,ABCC3	ENSG00000023839,ENSG00000091262,ENSG00000103222,ENSG00000108846
WBGene00000478	cfz-2	0.681497	0.0246917	286 - 321	100 - 269	5.91	2.94333	F27E11.3	FZD5,FZD8,FZD10,FZD9,FZD4,FZD7,FZD1,FZD2	ENSG00000163251,ENSG00000177283,ENSG00000111432,ENSG00000188763,ENSG00000174804,ENSG00000155760,ENSG00000157240,ENSG00000180340
WBGene00000479	cgh-1	-0.518249	0.000736682	60971 - 61439	71071 - 81684	1113.28	1287.6	C07H6.5	DDX6	ENSG00000110367
WBGene00000480	cgp-1	-0.457074	0.00110681	5155 - 5389	6112 - 6499	90.6667	99.9633	Y38C9A.2	GTPBP1,GTPBP2	ENSG00000100226,ENSG00000172432
WBGene00000481	cha-1	1.38787	0.00443682	48 - 84	8 - 39	1.26333	0.313333	ZC416.8	CHAT	ENSG00000070748
WBGene00000482	chd-3	0.274642	0.33737	3081 - 3481	1402 - 3896	23.6567	16.3733	T14G8.1	CHD4,CHD3,CHD5	ENSG00000111642,ENSG00000170004,ENSG00000116254
WBGene00000484	che-2	1.86607	0.000222004	35 - 45	1 - 10	0.64	0.09	F38G1.1	IFT80,TRIM59	ENSG00000068885,ENSG00000248710,ENSG00000213186
WBGene00000485	che-3	1.37405	8.50149e-05	109 - 171	25 - 63	0.423333	0.12	F18C12.1	DYNC2H1,DYNC1H1,DNAH9,DNAH6,DNAH7,DNAH5,DNAH11,DNAH1,DNAH8,DNAH3,DNAH12,DNAH2,DNAH14,DNAH17,DNAH10	ENSG00000187240,ENSG00000197102,ENSG00000007174,ENSG00000115423,ENSG00000118997,ENSG00000039139,ENSG00000105877,ENSG00000114841,ENSG00000124721,ENSG00000158486,ENSG00000174844,ENSG00000183914,ENSG00000185842,ENSG00000187775,ENSG00000197653
WBGene00000488	che-7	1.30536	0.00376608	45 - 64	10 - 27	1.09	0.263333	F26D11.10
WBGene00000490	che-11	1.90694	1.37048e-05	80 - 87	4 - 27	0.736667	0.126667	C27A7.4	IFT140	ENSG00000187535
WBGene00000491	che-12	1.58212	2.35157e-06	95 - 104	19 - 30	1.62667	0.44	B0024.8	TOGARAM1,TOGARAM2	ENSG00000198718,ENSG00000189350
WBGene00000492	che-13	1.17626	0.00320355	55 - 62	17 - 22	1.92333	0.54	F59C6.7	IFT57	ENSG00000114446
WBGene00000493	che-14	0.744529	0.0240436	102 - 121	37 - 78	1.42333	0.646667	F56H1.1	DISP2,DISP1,DISP3	ENSG00000140323,ENSG00000154309,ENSG00000204624
WBGene00000496	chs-1	-0.661854	2.0932e-08	11781 - 12581	15440 - 17633	111.08	142.38	T25G3.2
WBGene00000497	chs-2	-0.166519	0.500564	267 - 326	260 - 316	2.21667	1.98	F48A11.1
WBGene00000498	chk-1	-0.318799	0.0224801	2328 - 2416	2568 - 2606	55.9867	56.0667	Y39H10A.7	CHEK1	ENSG00000149554
WBGene00000499	chk-2	-0.40135	0.0347978	391 - 441	436 - 526	9.84	10.3867	Y60A3A.12	CHEK2	ENSG00000183765
WBGene00000500	chn-1	-0.52364	9.95498e-05	2146 - 2529	2763 - 2917	81.4167	94.1267	T09B4.10	STUB1	ENSG00000103266
WBGene00000501	cho-1	1.49433	0.000232858	54 - 71	12 - 20	1.29667	0.313333	C48D1.3	SLC5A7	ENSG00000115665
WBGene00000502	chp-1	-0.207308	0.135545	2005 - 2340	2088 - 2210	73.8933	68.9	Y110A7A.13	CHORDC1,ITGB1BP2	ENSG00000110172,ENSG00000147166
WBGene00000503	cht-1	0.535079	0.268388	9825 - 10924	3267 - 11247	203.927	110.767	C04F6.3	CHIT1,CHIA,CHI3L2,CHI3L1,OVGP1	ENSG00000133063,ENSG00000134216,ENSG00000064886,ENSG00000133048,ENSG00000085465
WBGene00000506	cic-1	-0.357699	0.0163931	577 - 652	613 - 754	22.39	23.3033	H14E04.5	CCNC	ENSG00000112237
WBGene00000507	cit-1.1	-0.104592	0.558908	1044 - 1077	905 - 1063	31.25	27.16	F44B9.4	CCNT1,CCNT2	ENSG00000129315,ENSG00000082258
WBGene00000508	cit-1.2	-0.0666262	0.660331	1514 - 1573	1213 - 1677	27.4133	23.1367	F44B9.3	CCNT1,CCNT2,CCNL2	ENSG00000129315,ENSG00000082258,ENSG00000221978
WBGene00000509	cka-1	-0.263928	0.0456782	1644 - 1785	1710 - 1837	41.8833	40.2667	C28D4.2	CHKB,CHKA,CHKB-CPT1B	ENSG00000100288,ENSG00000110721,ENSG00000254413
WBGene00000510	cka-2	1.07243	0.000421986	107 - 143	43 - 63	3.44333	1.29667	C52B9.1	CHKA,CHKB,CHKB-CPT1B	ENSG00000110721,ENSG00000100288,ENSG00000254413
WBGene00000511	ckb-1	0.567491	0.056322	131 - 162	63 - 119	4.90667	2.65333	B0285.8	CHKB,CHKA,CHKB-CPT1B	ENSG00000100288,ENSG00000110721,ENSG00000254413
WBGene00000512	ckb-2	0.307468	0.206497	489 - 804	347 - 531	18.44	11.9767	B0285.9	CHKB,CHKA,CHKB-CPT1B	ENSG00000100288,ENSG00000110721,ENSG00000254413
WBGene00000513	ckb-3	0.562678	0.351146	1 - 12	0 - 3	0.19	0.0366667	B0285.10	CHKB,CHKA,CHKB-CPT1B	ENSG00000100288,ENSG00000110721,ENSG00000254413
WBGene00000514	ckb-4	0.204218	0.427385	332 - 407	212 - 401	11.4733	8.15	F22F7.5	CHKB,CHKA,CHKB-CPT1B	ENSG00000100288,ENSG00000110721,ENSG00000254413
WBGene00000515	ckc-1	-0.349663	0.0509507	529 - 592	521 - 829	18.2467	19.15	T27A10.3	ETNK1,ETNK2	ENSG00000139163,ENSG00000143845
WBGene00000516	cki-1	0.814921	7.9128e-05	333 - 376	132 - 226	19.0267	8.71667	T05A6.1
WBGene00000517	cki-2	-0.232878	0.12069	1202 - 1317	1284 - 1310	39.5	37.8667	T05A6.2	CDKN1B	ENSG00000111276
WBGene00000518	ckk-1	0.63993	0.0250263	139 - 146	58 - 89	2.97	1.56	C05H8.1	CAMKK1,CAMKK2	ENSG00000004660,ENSG00000110931
WBGene00000519	cku-70	-0.202021	0.235885	2150 - 2341	2138 - 2313	42.1333	38.8	Y47D3A.4	XRCC6	ENSG00000196419
WBGene00000520	cku-80	-0.184704	0.165403	2325 - 2766	2155 - 2761	41.5667	38.5133	R07E5.8	XRCC5	ENSG00000079246
WBGene00000521	cky-1	1.44487	0.000625866	79 - 108	11 - 48	1.68	0.423333	C15C8.2	NPAS4	ENSG00000174576
WBGene00000522	clc-1	-0.363362	0.0204585	1190 - 1448	1225 - 1885	85.6967	90.31	C09F12.1
WBGene00000523	clc-2	0.427684	0.222934	97 - 124	51 - 106	4.65667	2.70333	C01C10.1
WBGene00000524	clc-3	0.539746	0.0979911	78 - 106	48 - 59	4.64333	2.43	ZK563.4
WBGene00000525	clc-4	-0.995903	0.0896281	4 - 7	7 - 27	0.406667	0.953333	T05A10.2
WBGene00000526	clc-5	1.02071	0.00122699	143 - 209	45 - 103	6.06	2.30333	C01C10.4
WBGene00000527	cle-1	0.167072	0.34428	1188 - 1428	957 - 1015	21.4933	15.7767	C36B1.1	COL18A1,COL15A1	ENSG00000182871,ENSG00000204291
WBGene00000528	clh-1	0.120478	0.529795	893 - 1150	706 - 880	12.6267	9.27667	T27D12.2	CLCN2,CLCN1,CLCNKB,CLCNKA	ENSG00000114859,ENSG00000188037,ENSG00000184908,ENSG00000186510
WBGene00000529	clh-2	0.513348	0.230545	47 - 55	21 - 40	0.64	0.38	B0491.8	CLCN2,CLCN1,CLCNKB,CLCNKA	ENSG00000114859,ENSG00000188037,ENSG00000184908,ENSG00000186510
WBGene00000530	clh-3	-0.152069	0.346103	623 - 668	539 - 743	7.12333	6.46	E04F6.11	CLCN2,CLCN1,CLCNKB,CLCNKA	ENSG00000114859,ENSG00000188037,ENSG00000184908,ENSG00000186510
WBGene00000531	clh-4	1.13075	0.00607411	48 - 53	15 - 23	0.606667	0.19	T06F4.2	CLCN2,CLCN1,CLCNKB,CLCNKA	ENSG00000114859,ENSG00000188037,ENSG00000184908,ENSG00000186510
WBGene00000532	clh-5	-0.168161	0.201454	2836 - 2990	2604 - 3095	38.9567	35.1733	C07H4.2	CLCN3,CLCN4,CLCN5	ENSG00000109572,ENSG00000073464,ENSG00000171365
WBGene00000533	clh-6	-0.377733	0.0104519	1682 - 1768	1869 - 2043	25.5967	26.95	R07B7.1	CLCN7	ENSG00000103249
WBGene00000534	cpi-2	-0.522216	0.000280497	3836 - 4671	4959 - 5713	334.067	386.333	R01B10.1	CST2,CST7,CST3,CST4,CSTL1,CST5,CST1,CST6	ENSG00000170369,ENSG00000077984,ENSG00000101439,ENSG00000101441,ENSG00000125823,ENSG00000170367,ENSG00000170373,ENSG00000175315
WBGene00000535	cpi-1	-1.37429	2.31826e-33	3250 - 3611	6998 - 8716	306.93	652.387	K08B4.6	CST7,CST3,CST4,CSTL1,CST5,CST2,CST1,CST6	ENSG00000077984,ENSG00000101439,ENSG00000101441,ENSG00000125823,ENSG00000170367,ENSG00000170369,ENSG00000170373,ENSG00000175315
WBGene00000536	clk-1	-0.151193	0.446081	830 - 1000	846 - 949	52.2567	46.64	ZC395.2	COQ7	ENSG00000167186
WBGene00000537	clk-2	-0.0679506	0.693747	1747 - 2027	1568 - 1793	26.33	22.1067	C07H6.6	TELO2	ENSG00000100726
WBGene00000539	cln-3.1	-0.0706831	0.85479	78 - 89	63 - 103	2.48667	2.23667	F07B10.1	CLN3	ENSG00000188603,ENSG00000261832
WBGene00000540	cln-3.2	0.0290806	0.891579	482 - 490	373 - 452	14.2033	11.2167	C01G8.2	CLN3	ENSG00000188603,ENSG00000261832
WBGene00000541	cln-3.3	0.72529	0.0785238	59 - 93	22 - 54	2.03667	0.966667	ZC190.1	CLN3	ENSG00000188603,ENSG00000261832
WBGene00000542	clp-1	0.0869276	0.592683	4841 - 5070	3813 - 4256	72.88	55.4567	C06G4.2	CAPN8,CAPN1,CAPN3,CAPN9,CAPN11,CAPN2,CAPN12	ENSG00000203697,ENSG00000014216,ENSG00000092529,ENSG00000135773,ENSG00000137225,ENSG00000162909,ENSG00000182472
WBGene00000543	clp-2	-0.258568	0.0620553	1328 - 1626	1414 - 1855	23.1567	22.7033	T04A8.16	CAPN7	ENSG00000131375
WBGene00000544	clp-3	0.665575	0.155314	37 - 46	13 - 31	0.636667	0.293333	Y47H10A.1	CAPN8,CAPN1,CAPN3,CAPN9,CAPN11,CAPN2	ENSG00000203697,ENSG00000014216,ENSG00000092529,ENSG00000135773,ENSG00000137225,ENSG00000162909
WBGene00000545	clp-4	0.682779	7.03789e-08	1245 - 1298	623 - 764	21.6133	10.9133	Y39A3CL.5	CAPN8,CAPN9,CAPN11,CAPN2,CAPN1,CAPN3,CAPN12	ENSG00000203697,ENSG00000135773,ENSG00000137225,ENSG00000162909,ENSG00000014216,ENSG00000092529,ENSG00000182472
WBGene00000546	clp-6	0.0744284	0.872657	56 - 60	41 - 55	1.06667	0.85	Y77E11A.10	CAPN8,CAPN1,CAPN3,CAPN9,CAPN11,CAPN2,CAPN12	ENSG00000203697,ENSG00000014216,ENSG00000092529,ENSG00000135773,ENSG00000137225,ENSG00000162909,ENSG00000182472
WBGene00000547	clp-7	-0.283679	0.161086	3129 - 3616	3182 - 4101	63.4633	62.6633	Y77E11A.11	CAPN8,CAPN1,CAPN3,CAPN9,CAPN11,CAPN2,CAPN12	ENSG00000203697,ENSG00000014216,ENSG00000092529,ENSG00000135773,ENSG00000137225,ENSG00000162909,ENSG00000182472
WBGene00000548	clr-1	0.0276653	0.879124	4178 - 4467	2974 - 4367	35.7433	28.57	F56D1.4	PTPRC,PTPN5,PTPN7,PTPRR	ENSG00000081237,ENSG00000110786,ENSG00000143851,ENSG00000153233
WBGene00000549	cls-2	0.0579452	0.732396	3029 - 3191	2168 - 3272	37.8733	29.6667	R107.6	CLASP2,CLASP1	ENSG00000163539,ENSG00000074054
WBGene00000550	clu-1	0.206032	0.155314	8633 - 9145	5613 - 7296	79.9633	56.1133	F55H2.6	CLUH	ENSG00000132361
WBGene00000551	clx-1	0.345466	1	2 - 6	1 - 4	0.19	0.0866667	C50F7.2	ATN1,RERE,PRR36,PRB1	ENSG00000111676,ENSG00000142599,ENSG00000183248,ENSG00000251655
WBGene00000552	cmd-1	0.150942	0.268053	7544 - 8433	5905 - 6644	237.52	173.553	T21H3.3	CALM2,CALM3,CALM1,CALML3	ENSG00000143933,ENSG00000160014,ENSG00000198668,ENSG00000178363
WBGene00000553	cmk-1	1.38728	7.04187e-06	122 - 148	33 - 60	3.72667	1.06333	K07A9.2	CAMK1,CAMK1D,PNCK,CAMK1G,CAMK2B,CAMK2A,CAMK2D,CAMK2G,CAMK4	ENSG00000134072,ENSG00000183049,ENSG00000130822,ENSG00000008118,ENSG00000058404,ENSG00000070808,ENSG00000145349,ENSG00000148660,ENSG00000152495
WBGene00000554	cnb-1	0.496987	0.00143045	830 - 947	472 - 693	42.9167	23.91	F55C10.1	PPP3R1,PPP3R2	ENSG00000221823,ENSG00000188386,ENSG00000273398
WBGene00000556	cnc-2	0.822641	0.0074296	259 - 334	91 - 236	41.6567	18.4733	R09B5.3
WBGene00000557	cnc-3	0.636214	0.00879152	184 - 217	91 - 140	23.6867	12.3733	R09B5.8
WBGene00000558	cnc-4	0.693232	0.00627177	265 - 336	115 - 232	36.0233	18.05	R09B5.9
WBGene00000560	cnc-6	0.888	0.108786	21 - 36	3 - 16	2.87667	0.976667	Y46E12A.1
WBGene00000561	cnd-1	0.303196	0.603105	38 - 41	9 - 52	2.08667	1.30667	C34E10.7	NEUROD1,NEUROD6,NEUROD4,NEUROD2	ENSG00000162992,ENSG00000164600,ENSG00000123307,ENSG00000171532
WBGene00000562	cng-1	0.820841	0.000995853	327 - 520	140 - 267	5.82333	2.70333	F14H8.6	CNGA4,CNGA3,CNGA2,CNGA1	ENSG00000132259,ENSG00000144191,ENSG00000183862,ENSG00000198515
WBGene00000564	cnk-1	-0.348361	0.0280302	2327 - 2644	2540 - 2944	31.7667	32.7233	R01H10.8	CNKSR2,CNKSR1,IPCEF1,CNKSR3	ENSG00000149970,ENSG00000142675,ENSG00000074706,ENSG00000153721
WBGene00000565	cnt-1	0.146765	0.363071	1502 - 1555	1066 - 1289	22.87	16.6367	Y17G7B.15	ACAP2,ACAP1,ACAP3	ENSG00000114331,ENSG00000072818,ENSG00000131584
WBGene00000566	cnt-2	0.150317	0.323352	2435 - 2581	1830 - 2063	37.0667	26.72	Y39A1A.15	AGAP1,AGAP3,AGAP2,AGAP5,AGAP4,AGAP6,AGAP9	ENSG00000157985,ENSG00000133612,ENSG00000135439,ENSG00000172650,ENSG00000188234,ENSG00000204149,ENSG00000204172,ENSG00000279058,ENSG00000264204
WBGene00000567	cnx-1	-0.246535	0.0353418	8299 - 9326	8400 - 9461	173.057	169.66	ZK632.6	CANX,CLGN	ENSG00000127022,ENSG00000153132
WBGene00000583	cof-2	0.729332	0.062958	58 - 70	23 - 44	1.73667	0.78	C48E7.5	GLDN,OLFML2B,MYOC,OLFM4,OLFM2,OLFML3,OLFM3,OLFM1,OLFML1,OLFML2A	ENSG00000186417,ENSG00000162745,ENSG00000034971,ENSG00000102837,ENSG00000105088,ENSG00000116774,ENSG00000118733,ENSG00000130558,ENSG00000183801,ENSG00000185585
WBGene00000584	cog-1	0.14283	0.794779	27 - 39	20 - 32	1.15333	0.9	R03C1.3	NKX6-1,NKX6-2,NKX6-3	ENSG00000163623,ENSG00000148826,ENSG00000165066
WBGene00000585	cogc-2	0.086383	0.506898	2135 - 2324	1629 - 2129	39.99	31.0167	C06G3.10	COG2	ENSG00000135775
WBGene00000591	coh-1	0.152805	0.465312	798 - 915	549 - 907	10.8967	8.03	K08A8.3	RAD21,RAD21L1	ENSG00000164754,ENSG00000244588
WBGene00000592	coh-3	-0.53264	0.00624952	1594 - 1619	1713 - 2180	29.6533	34.7933	F08H9.1
WBGene00000593	col-2	0.76175	1	4 - 6	0 - 1	0.216667	0.0266667	W01B6.7
WBGene00000594	col-3	1.6294	0.00013882	65 - 137	12 - 39	226.427	52.37	T28C6.6	MARCO	ENSG00000019169
WBGene00000596	col-7	1.47762	0.00731443	1 - 43	0 - 0	4.00333	0.0266667	C15A11.5	SFTPD	ENSG00000133661
WBGene00000597	col-8	2.28241	2.26246e-119	17769 - 21460	3157 - 3871	905.04	148.493	F11H8.3	SFTPD	ENSG00000133661
WBGene00000598	col-9	-0.466309	0.464422	1 - 4	1 - 8	0.1	0.196667	F54B11.1
WBGene00000599	col-10	1.86982	0.000128983	1219 - 3971	275 - 684	397.02	56.7067	B0222.8	SFTPD	ENSG00000133661
WBGene00000601	col-12	2.14507	7.35398e-10	287 - 394	27 - 106	60.7567	9.15667	F15H10.1	MARCO	ENSG00000019169
WBGene00000602	col-13	2.22372	1.72961e-10	199 - 317	23 - 70	51.97	8.45	F15H10.2	MARCO	ENSG00000019169
WBGene00000603	col-14	2.16801	3.1857e-05	621 - 1032	29 - 166	33.5767	2.98333	C46A5.3	COL17A1,MARCO	ENSG00000065618,ENSG00000019169
WBGene00000606	col-17	2.13891	6.03263e-05	882 - 3802	112 - 411	110.8	9	F11G11.10	NCOA5	ENSG00000124160
WBGene00000608	col-19	1.58921	5.79683e-32	17375 - 24615	5326 - 6175	838.263	220.43	ZK1193.1	SFTPD	ENSG00000133661
WBGene00000609	col-20	2.39739	7.03629e-65	23373 - 33248	4060 - 4422	1085.27	160.243	F11G11.11
WBGene00000610	col-33	0.933659	0.104416	13 - 22	3 - 8	0.776667	0.216667	F36A4.6
WBGene00000611	col-34	1.4666	2.50716e-10	363 - 542	111 - 168	19.9733	5.66333	F36A4.10	MARCO	ENSG00000019169
WBGene00000613	col-36	0.354384	0.597649	3 - 7	2 - 4	0.24	0.106667	C27H5.5
WBGene00000614	col-37	-0.0832216	1	0 - 1	0 - 1	0	0	ZK863.2	SFTPD,C1QTNF9B,C1QTNF9	ENSG00000133661,ENSG00000205863,ENSG00000240654
WBGene00000615	col-38	1.62658	4.60791e-05	97 - 360	36 - 56	9.53	2.01	F54C9.4	SFTPD	ENSG00000133661
WBGene00000616	col-39	1.64377	0.00329631	1043 - 2464	76 - 525	72.6267	8.99667	C09G5.4	SFTPD	ENSG00000133661
WBGene00000617	col-40	-0.0609093	0.936952	4 - 10	3 - 10	0.246667	0.233333	T13B5.4	MARCO	ENSG00000019169
WBGene00000618	col-41	2.10378	7.35398e-10	366 - 770	63 - 180	17.5733	2.84333	T10B10.1	SFTPD	ENSG00000133661
WBGene00000620	col-43	-0.683807	0.0030311	133 - 163	188 - 268	6.23	8.29333	ZC513.8	MARCO	ENSG00000019169
WBGene00000621	col-44	0.39727	1	3 - 8	1 - 4	0.163333	0.0933333	F54B11.2
WBGene00000622	col-45	-0.199633	0.72144	18 - 37	22 - 48	1.21	1.08	F53G12.7	MARCO	ENSG00000019169
WBGene00000623	col-46	2.30889	1.16183e-07	54 - 118	5 - 15	3.66333	0.366667	Y18H1A.13
WBGene00000624	col-47	0.922217	0.127398	9 - 21	2 - 5	0.53	0.163333	Y18H1A.12
WBGene00000625	col-48	2.72981	2.25548e-15	354 - 630	27 - 94	22.2467	2.16667	Y54E10BL.2	COL17A1,MARCO	ENSG00000065618,ENSG00000019169
WBGene00000626	col-49	1.39309	0.010794	12 - 175	0 - 2	4.12	0.03	K09H9.3	SFTPD	ENSG00000133661
WBGene00000627	col-50	0.0746049	0.922222	5 - 8	5 - 5	0.14	0.13	T28F2.6	SFTPD	ENSG00000133661
WBGene00000630	col-53	0.70901	0.132604	33 - 44	14 - 20	1.73333	0.773333	M01A12.1
WBGene00000631	col-54	1.68029	0.00292919	210 - 467	10 - 88	15.4967	1.62333	F33D11.3	SFTPD	ENSG00000133661
WBGene00000633	col-56	1.25322	0.0267406	5 - 11	0 - 1	0.393333	0.0133333	T08B2.2
WBGene00000634	col-58	2.40112	6.56374e-08	70 - 148	5 - 24	4.82	0.496667	F26B1.4	COLQ	ENSG00000206561
WBGene00000636	col-60	0.943082	0.0724717	19 - 91	15 - 18	1.82	0.596667	F22D6.10	SFTPD	ENSG00000133661
WBGene00000637	col-61	1.23851	0.0309508	13 - 22	2 - 5	0.68	0.14	C01H6.1	SFTPD	ENSG00000133661
WBGene00000638	col-62	1.32924	0.0223939	7 - 31	0 - 3	3.63	0.72	C15A11.6	SFTPD	ENSG00000133661
WBGene00000639	col-63	1.70632	0.0013219	15 - 170	9 - 14	2.65667	0.316667	ZK265.2	SFTPD	ENSG00000133661
WBGene00000640	col-64	-0.65258	0.113957	27 - 34	44 - 46	1.04667	1.38	F52F12.2	SFTPD	ENSG00000133661
WBGene00000641	col-65	2.64243	1.46767e-13	310 - 675	31 - 103	22.16	2.25333	K08C9.4	SFTPD	ENSG00000133661
WBGene00000644	col-68	-0.411171	0.351346	33 - 56	49 - 69	1.79667	2.00667	C50D2.4	MARCO	ENSG00000019169
WBGene00000645	col-69	1.11111	0.0395296	22 - 35	3 - 13	0.893333	0.25	K01A2.7	SFTPD	ENSG00000133661
WBGene00000647	col-71	0.247775	0.448144	113 - 168	76 - 123	4.37	2.87	Y49F6B.10	COLQ	ENSG00000206561
WBGene00000649	col-73	1.7459	0.00211084	705 - 2714	36 - 307	92.1933	6.10667	F11G11.12	MARCO	ENSG00000019169
WBGene00000650	col-74	5.42852	2.02792e-59	398 - 717	4 - 9	22.5733	0.196667	ZK1248.2	COLQ	ENSG00000206561
WBGene00000651	col-75	0.631188	0.321657	5 - 12	2 - 5	0.39	0.13	K03H9.2	C1QTNF2,C1QTNF7,ADIPOQ,OTOL1,C1QTNF9B,C1QTNF9	ENSG00000145861,ENSG00000163145,ENSG00000181092,ENSG00000182447,ENSG00000205863,ENSG00000240654
WBGene00000652	col-76	0.579786	0.000316273	674 - 704	349 - 507	16.5	8.88333	M110.1
WBGene00000653	col-77	2.25997	7.95151e-06	484 - 647	20 - 111	22.8567	2.00667	M195.1	MARCO	ENSG00000019169
WBGene00000655	col-79	1.93124	0.000473946	23 - 27	0 - 5	1.15667	0.0933333	C09G5.3	SFTPD	ENSG00000133661
WBGene00000656	col-80	2.28555	5.74772e-30	8735 - 14922	1618 - 2041	460.417	70.43	C09G5.5	SFTPD	ENSG00000133661
WBGene00000657	col-81	2.57136	2.58583e-06	188 - 2094	27 - 27	40.8067	1.03333	F38A3.1	MARCO	ENSG00000019169
WBGene00000658	col-83	0.120415	0.855077	14 - 19	10 - 18	0.546667	0.38	F33A8.9
WBGene00000659	col-84	0.0155663	0.98156	14 - 21	10 - 22	0.676667	0.576667	K12D12.3	COLQ	ENSG00000206561
WBGene00000660	col-85	-0.683025	0.255857	6 - 9	10 - 19	0.27	0.493333	T21B4.2	MARCO	ENSG00000019169
WBGene00000661	col-86	-0.732796	0.136359	12 - 23	26 - 31	0.84	1.23667	Y81G3A.5	SFTPD	ENSG00000133661
WBGene00000663	col-88	1.79186	0.000162253	32 - 65	5 - 9	2.04667	0.3	W05G11.3	SFTPD	ENSG00000133661
WBGene00000664	col-89	1.40643	0.0026366	58 - 105	9 - 40	3.64333	0.82	F17C8.2	SFTPD	ENSG00000133661
WBGene00000665	col-90	1.71251	0.00260121	2017 - 5673	94 - 792	148.673	11.4333	C29E4.1	SFTPD	ENSG00000133661
WBGene00000666	col-91	1.57516	0.000225503	84 - 206	21 - 72	7.1	1.58667	F09G8.6	SFTPD	ENSG00000133661
WBGene00000667	col-92	2.29412	6.55329e-19	373 - 396	39 - 100	63.28	9.83	W05B2.6	SFTPD	ENSG00000133661
WBGene00000668	col-93	4.77301	3.55957e-102	8199 - 11140	157 - 408	586.18	15.3133	W05B2.5	SFTPD	ENSG00000133661
WBGene00000669	col-94	2.92704	1.22853e-38	849 - 1009	61 - 154	216.073	22.46	W05B2.1	SFTPD	ENSG00000133661
WBGene00000670	col-95	0.57689	0.00364483	22478 - 25793	11244 - 15155	973.223	513.29	Y41C4A.16	MARCO	ENSG00000019169
WBGene00000671	col-96	0.28872	0.361482	182 - 379	170 - 194	12.2333	8.18	Y41C4A.19	SFTPD	ENSG00000133661
WBGene00000672	col-97	2.41382	2.57489e-13	181 - 294	18 - 50	9.06667	1.09	ZK1010.7
WBGene00000673	col-98	0.892959	3.70332e-17	3927 - 4736	1871 - 2242	163.4	70.8033	F14F7.1
WBGene00000674	col-99	1.03695	0.00510094	109 - 158	33 - 94	2.12	0.78	F29C4.8	COL13A1,COL9A2,COL23A1,COL19A1,COL16A1,COL9A3,COL9A1,COL21A1,COL22A1,COL25A1	ENSG00000197467,ENSG00000049089,ENSG00000050767,ENSG00000082293,ENSG00000084636,ENSG00000092758,ENSG00000112280,ENSG00000124749,ENSG00000169436,ENSG00000188517
WBGene00000675	col-101	1.14455	4.53133e-26	37190 - 42058	14921 - 16119	1642.08	593.39	K02D7.3	MARCO	ENSG00000019169
WBGene00000677	col-103	0.983765	6.54975e-10	3618 - 4589	1598 - 1821	144.193	57.3733	F56B3.1
WBGene00000678	col-104	1.7666	0.00181754	329 - 709	11 - 102	25.0067	1.94333	F58F6.1	C1QTNF2,C1QTNF7,ADIPOQ,OTOL1,C1QTNF9B,C1QTNF9	ENSG00000145861,ENSG00000163145,ENSG00000181092,ENSG00000182447,ENSG00000205863,ENSG00000240654
WBGene00000679	col-105	0.77412	0.206077	7 - 13	0 - 4	0.456667	0.0966667	F58F6.2	MARCO	ENSG00000019169
WBGene00000680	col-106	0.544424	0.000102346	23042 - 28187	12612 - 19801	1186.2	662.22	Y77E11A.15	SFTPD	ENSG00000133661
WBGene00000681	col-107	1.87059	9.32501e-11	624 - 1330	154 - 326	45.3933	9.29	C34H4.4	SFTPD	ENSG00000133661
WBGene00000682	col-108	-0.0870996	0.90735	3 - 5	4 - 4	0.163333	0.153333	Y41D4A.2	MARCO	ENSG00000019169
WBGene00000683	col-109	2.54649	4.6678e-10	122 - 257	10 - 40	6.78667	0.693333	Y38C1BA.3
WBGene00000684	col-110	0.277297	0.680029	8 - 16	6 - 9	0.466667	0.28	F19C7.7
WBGene00000685	col-111	1.57688	2.69161e-07	274 - 465	66 - 158	16.59	4.32333	F29B9.9	C1QTNF2,C1QTNF7,ADIPOQ,OTOL1,C1QTNF9B,C1QTNF9	ENSG00000145861,ENSG00000163145,ENSG00000181092,ENSG00000182447,ENSG00000205863,ENSG00000240654
WBGene00000687	col-113	1.23646	4.39397e-06	171 - 199	50 - 73	7.25667	2.31333	C34D4.15	C1QTNF2,C1QTNF7,ADIPOQ,OTOL1,C1QTNF9B,C1QTNF9	ENSG00000145861,ENSG00000163145,ENSG00000181092,ENSG00000182447,ENSG00000205863,ENSG00000240654
WBGene00000688	col-114	0.351369	1	3 - 7	0 - 5	0.196667	0.07	D2024.8
WBGene00000689	col-115	1.94995	1.90033e-05	41 - 78	5 - 16	2.08	0.293333	Y42H9B.1
WBGene00000690	col-116	-0.668602	0.0734985	34 - 40	50 - 59	1.42667	1.99	F17E9.1	SFTPD	ENSG00000133661
WBGene00000691	col-117	1.77082	3.64084e-05	75 - 179	13 - 37	236.377	46.2867	T28C6.4	MARCO	ENSG00000019169
WBGene00000692	col-118	1.52013	2.34681e-26	882 - 983	258 - 306	40.88	11.2767	T11B7.3	SFTPD	ENSG00000133661
WBGene00000693	col-119	2.04265	2.63599e-93	48918 - 56805	9867 - 13352	2341.72	456.557	C53B4.5	SFTPD	ENSG00000133661
WBGene00000694	col-120	1.15457	0.0263416	22 - 59	7 - 12	1.35667	0.36	Y11D7A.11	MARCO,OTOL1	ENSG00000019169,ENSG00000182447
WBGene00000695	col-121	1.40249	2.66193e-11	329 - 461	105 - 158	14.1767	4.25	F56D5.1
WBGene00000696	col-122	0.786325	3.18759e-12	35830 - 45937	18104 - 23379	1727.61	808.51	T05A1.2	MARCO	ENSG00000019169
WBGene00000697	col-123	0.374135	0.561656	3 - 9	0 - 5	0.18	0.0666667	W08D2.6	COLQ	ENSG00000206561
WBGene00000698	col-124	2.15132	1.57033e-22	9927 - 21868	2557 - 2751	644.987	108.123	C24F3.6	SFTPD,BBC3	ENSG00000133661,ENSG00000105327
WBGene00000699	col-125	1.81987	2.47119e-05	937 - 2245	201 - 486	80.8833	14.4533	C29F4.1	MARCO	ENSG00000019169
WBGene00000702	col-128	2.30312	4.66711e-08	76 - 205	10 - 27	4.00333	0.47	F12F6.9
WBGene00000703	col-129	2.48674	5.01824e-06	365 - 3376	45 - 92	61.5433	2.17667	M18.1	SFTPD	ENSG00000133661
WBGene00000704	col-130	1.83978	2.67974e-08	231 - 565	65 - 124	17.6533	3.54333	F08G5.4	SFTPD	ENSG00000133661
WBGene00000705	col-131	2.54947	7.80247e-17	152 - 225	20 - 28	8.34333	0.893333	C39E9.3	SFTPD	ENSG00000133661
WBGene00000706	col-132	-0.12388	0.853558	9 - 16	10 - 18	0.61	0.553333	C39E9.9	SFTPD	ENSG00000133661
WBGene00000707	col-133	2.48702	2.2306e-10	230 - 455	17 - 78	14.9067	1.6	F52B11.4	MARCO	ENSG00000019169
WBGene00000708	col-135	0.0398581	0.9293	119 - 149	73 - 140	2.88667	2.44	M199.5	COL9A2,COL19A1,COL9A3,COL9A1,COL25A1,COL23A1,COL16A1,COL21A1,COL22A1,COL13A1,DSPP	ENSG00000049089,ENSG00000082293,ENSG00000092758,ENSG00000112280,ENSG00000188517,ENSG00000050767,ENSG00000084636,ENSG00000124749,ENSG00000169436,ENSG00000197467,ENSG00000152591
WBGene00000710	col-137	0.344896	0.607359	6 - 23	5 - 13	0.516667	0.266667	Y51H4A.9	MARCO	ENSG00000019169
WBGene00000711	col-138	3.02655	4.39657e-09	28 - 221	1 - 5	4.76667	0.103333	C52D10.13	MARCO	ENSG00000019169
WBGene00000712	col-139	2.45483	7.2727e-06	258 - 2736	40 - 56	54.27	1.78667	F41F3.4
WBGene00000713	col-140	2.04359	7.84801e-84	43489 - 52665	9309 - 10675	2197.71	422.833	F26F12.1	SFTPD	ENSG00000133661
WBGene00000714	col-141	1.37153	0.00618604	35 - 56	5 - 24	1.98333	0.463333	T15B7.5	SFTPD	ENSG00000133661
WBGene00000715	col-142	3.00368	3.02975e-31	892 - 1957	103 - 133	55.2433	4.72	T15B7.4	SFTPD	ENSG00000133661
WBGene00000716	col-143	1.13022	4.20804e-12	32381 - 36930	12099 - 14723	1509.51	540.677	T15B7.3	SFTPD	ENSG00000133661
WBGene00000717	col-144	1.91572	0.000107442	585 - 2057	137 - 318	225.66	29.28	B0222.6	SFTPD	ENSG00000133661
WBGene00000718	col-145	1.84768	0.000105243	83 - 238	9 - 63	8.56667	1.37	B0222.7	SFTPD	ENSG00000133661
WBGene00000719	col-146	0.949118	0.0276098	157 - 279	38 - 176	14.3067	5.77333	T06E4.6	SFTPD	ENSG00000133661
WBGene00000720	col-147	1.97033	7.6023e-06	1897 - 3671	288 - 788	192.49	30.3433	T06E4.4	SFTPD	ENSG00000133661
WBGene00000722	col-149	2.8561	5.70984e-11	593 - 1534	49 - 124	43.8833	3.02667	B0024.1	SFTPD	ENSG00000133661
WBGene00000723	col-150	0.560407	0.128488	63 - 90	35 - 53	3.12333	1.68	B0024.2	SFTPD	ENSG00000133661
WBGene00000725	col-152	-0.256562	0.713722	3 - 4	4 - 6	0.176667	0.206667	F32G8.5	SFTPD	ENSG00000133661
WBGene00000726	col-153	0.755861	0.0197592	104 - 109	46 - 63	3.74	1.63667	F17C11.3	COLQ	ENSG00000206561
WBGene00000727	col-154	1.5827	0.00526549	174 - 683	20 - 120	42.9067	4.91667	F55C10.2	MARCO	ENSG00000019169
WBGene00000728	col-155	1.09075	2.38211e-07	483 - 665	203 - 241	52.1467	18.9867	F55C10.3	MARCO	ENSG00000019169
WBGene00000729	col-156	1.67384	0.00285605	134 - 317	10 - 66	10.2167	1.17333	F57B7.3	SFTPD	ENSG00000133661
WBGene00000730	col-157	2.13533	2.25805e-06	73 - 325	14 - 53	10.83	1.35	T11F9.9	MARCO	ENSG00000019169
WBGene00000731	col-158	-1.50777	8.05575e-14	121 - 158	308 - 418	4.57	11.19	D2023.7	COLQ	ENSG00000206561
WBGene00000732	col-159	2.75694	6.93957e-29	784 - 1455	92 - 184	49.35	5.41667	F57B1.3	MARCO	ENSG00000019169
WBGene00000733	col-160	1.89834	4.51644e-24	8340 - 12660	1958 - 2479	456.337	93.5267	F57B1.4	MARCO	ENSG00000019169
WBGene00000734	col-161	2.19771	1.12242e-08	277 - 447	21 - 111	22.0267	3.12333	C50B6.4	SFTPD	ENSG00000133661
WBGene00000735	col-162	2.12924	8.24021e-10	185 - 337	22 - 70	16.06	2.57667	Y2H9A.3	SFTPD	ENSG00000133661
WBGene00000736	col-163	-0.146158	0.841439	2 - 8	4 - 9	0.0766667	0.0933333	F46B3.17
WBGene00000737	col-164	-0.250199	1	3 - 3	3 - 5	0.08	0.116667	T21D9.1	SFTPD	ENSG00000133661
WBGene00000738	col-165	5.32386	2.59888e-46	281 - 632	3 - 7	18.3633	0.133333	F14H12.1	MARCO	ENSG00000019169
WBGene00000739	col-166	0.853493	0.000196282	1544 - 2871	930 - 1189	176.933	77.4867	T07H6.3	MARCO	ENSG00000019169
WBGene00000740	col-167	1.98741	1.95468e-05	621 - 1586	113 - 291	130.15	18.0533	T10E10.2	MARCO	ENSG00000019169
WBGene00000741	col-168	1.69294	0.00216883	116 - 419	16 - 79	37.0867	4.32	T10E10.1	MARCO	ENSG00000019169
WBGene00000742	col-169	1.40483	0.00860306	169 - 533	42 - 152	23.8233	4.82	T10E10.5	MARCO	ENSG00000019169
WBGene00000743	col-170	2.53912	2.17684e-08	49 - 207	7 - 16	11.66	0.96	T10E10.6	MARCO	ENSG00000019169
WBGene00000745	col-172	2.20128	1.2321e-11	144 - 232	19 - 40	7.39333	0.99	F38B6.5	MARCO	ENSG00000019169
WBGene00000746	col-173	2.149	6.25001e-09	134 - 301	21 - 57	7.90667	1.19	F41C6.5	MARCO	ENSG00000019169
WBGene00000747	col-174	2.17161	6.44918e-06	42 - 91	3 - 14	2.00333	0.193333	F46C8.2	MARCO	ENSG00000019169
WBGene00000748	col-175	2.27794	3.00264e-05	8 - 167	2 - 7	3.77333	0.163333	C35B8.1	SFTPD	ENSG00000133661
WBGene00000749	col-176	0.901539	7.59303e-05	414 - 636	219 - 245	19.96	8.47333	ZC373.7	SFTPD,BBC3	ENSG00000133661,ENSG00000105327
WBGene00000750	col-177	1.8831	0.000192218	28 - 43	2 - 7	0.986667	0.126667	F59F3.2	COL17A1	ENSG00000065618
WBGene00000751	col-178	2.08464	4.35027e-72	18464 - 22511	3838 - 4282	1387.24	259.183	C34F6.2	MARCO	ENSG00000019169
WBGene00000752	col-179	1.9457	2.92967e-15	2071 - 3328	366 - 875	182.02	36.71	C34F6.3	MARCO	ENSG00000019169
WBGene00000753	col-180	1.76405	0.00106496	423 - 1378	64 - 251	41.4533	5.38	C44C10.1	MARCO	ENSG00000019169
WBGene00000754	col-181	0.509945	0.000274514	36292 - 45291	20759 - 32208	1854.71	1060.55	W03G11.1	MARCO	ENSG00000019169
WBGene00000755	col-182	2.31512	2.3766e-06	33 - 72	2 - 9	2.22667	0.186667	R09A8.4	C1QTNF2,C1QTNF7,ADIPOQ,OTOL1,C1QTNF9B,C1QTNF9	ENSG00000145861,ENSG00000163145,ENSG00000181092,ENSG00000182447,ENSG00000205863,ENSG00000240654
WBGene00000756	col-183	-2.55404	2.6775e-08	4 - 8	37 - 66	0.233333	2.03	F02D10.1
WBGene00000757	col-184	0.654795	3.55092e-05	22231 - 26632	10765 - 18300	1072.21	555.823	F15A2.1	SFTPD	ENSG00000133661
WBGene00000759	col-186	1.25235	0.0115252	31 - 41	6 - 18	1.22667	0.306667	E03G2.4	MARCO	ENSG00000019169
WBGene00000760	col-187	0.299251	0.66373	6 - 13	3 - 8	0.383333	0.176667	C30F2.1
WBGene00000761	coq-1	-0.0861992	0.585435	1126 - 1161	1013 - 1126	29.11	25.1533	C24A11.9	PDSS1	ENSG00000148459
WBGene00000762	coq-2	-0.25469	0.164353	780 - 921	796 - 930	30.5933	28.7867	F57B9.4	COQ2	ENSG00000173085
WBGene00000763	coq-3	0.0356043	0.873508	592 - 627	495 - 528	32.04	24.9767	Y57G11C.11	COQ3	ENSG00000132423
WBGene00000764	coq-4	-0.512152	0.0273042	452 - 602	562 - 781	30.4933	35.0467	T03F1.2	COQ4	ENSG00000167113
WBGene00000765	coq-5	-0.175644	0.331782	1699 - 1906	1649 - 1864	78.04	70.8233	ZK652.9	COQ5	ENSG00000110871
WBGene00000766	coq-6	-0.430621	0.0130272	1132 - 1239	1275 - 1472	34.6367	37.55	K07B1.2	COQ6	ENSG00000119723
WBGene00000767	coq-8	-0.193594	0.238378	3094 - 3320	3054 - 3412	54.2767	49.8933	C35D10.4	COQ8A,COQ8B	ENSG00000163050,ENSG00000123815
WBGene00000768	cor-1	1.26954	1.26078e-07	246 - 343	96 - 109	6.15	1.97333	R01H10.3	CORO1C,CORO1A,CORO6,CORO1B,CORO2B,CORO2A	ENSG00000110880,ENSG00000102879,ENSG00000167549,ENSG00000172725,ENSG00000103647,ENSG00000106789
WBGene00000770	cpb-1	-0.735205	4.63935e-05	1727 - 1889	2270 - 2896	32.7167	43.9733	C40H1.1	CPEB3,CPEB4,CPEB2,CPEB2	ENSG00000107864,ENSG00000113742,ENSG00000137449,ENSG00000283087
WBGene00000771	cpb-2	0.134106	0.766093	48 - 78	35 - 67	1.39333	0.99	C30B5.3	CPEB3,CPEB4,CPEB2	ENSG00000107864,ENSG00000113742,ENSG00000137449
WBGene00000772	cpb-3	-0.306069	0.018238	5128 - 5243	5127 - 5838	74.09	74	B0414.5	CPEB1,CPEB1	ENSG00000214575,ENSG00000260836,ENSG00000277445,ENSG00000282755
WBGene00000773	cpf-1	-0.289649	0.012578	2332 - 2717	2444 - 2951	65.5867	65.1733	F28C6.3	CSTF1	ENSG00000101138
WBGene00000774	cpf-2	-0.440104	0.0104174	2166 - 2398	2483 - 2891	87.4133	94.8267	F56A8.6	CSTF2,CSTF2T	ENSG00000101811,ENSG00000177613
WBGene00000775	cpin-1	0.262904	0.432862	188 - 239	108 - 254	6.47333	4.45667	F38E11.3	GDA	ENSG00000119125
WBGene00000776	cpl-1	0.148959	0.286404	26517 - 29761	21168 - 22908	963.18	700.13	T03E6.7	CTSV,CTSL,CTSK,CTSS,CTSF	ENSG00000136943,ENSG00000135047,ENSG00000143387,ENSG00000163131,ENSG00000174080
WBGene00000777	cpn-1	-0.235481	0.1548	6464 - 7554	6771 - 7630	350.58	331.723	F43G9.9	TAGLN3,TAGLN,TAGLN2,CNN2,CNN3,CNN1	ENSG00000144834,ENSG00000149591,ENSG00000158710,ENSG00000064666,ENSG00000117519,ENSG00000130176
WBGene00000778	cpn-2	0.758265	0.00688172	180 - 227	69 - 137	11.41	5.59	D1069.2	TAGLN3,TAGLN,TAGLN2,CNN3,CNN1,CNN2	ENSG00000144834,ENSG00000149591,ENSG00000158710,ENSG00000117519,ENSG00000130176,ENSG00000064666
WBGene00000779	cpn-3	0.737658	2.71171e-08	5613 - 6681	2739 - 3661	409.263	197.627	F28H1.2	CNN2,CNN3,CNN1,TAGLN3,TAGLN,TAGLN2	ENSG00000064666,ENSG00000117519,ENSG00000130176,ENSG00000144834,ENSG00000149591,ENSG00000158710
WBGene00000780	cpn-4	0.606012	0.000224834	811 - 960	413 - 647	66.2733	35.61	F49D11.8	CNN2,CNN3,CNN1,TAGLN3,TAGLN,TAGLN2	ENSG00000064666,ENSG00000117519,ENSG00000130176,ENSG00000144834,ENSG00000149591,ENSG00000158710
WBGene00000781	cpr-1	2.09658	7.74645e-07	2509 - 4993	342 - 937	142.243	20.1267	C52E4.1	CTSB	ENSG00000164733
WBGene00000782	cpr-2	0.703126	0.260242	7 - 11	0 - 4	0.393333	0.106667	F36D3.9	CTSB,CTSC	ENSG00000164733,ENSG00000109861
WBGene00000783	cpr-3	-0.244322	0.114783	773 - 952	779 - 1075	25.9233	24.87	T10H4.12	CTSB	ENSG00000164733
WBGene00000784	cpr-4	0.585924	8.10644e-05	1821 - 2174	1047 - 1228	75.0633	39.94	F44C4.3	CTSB	ENSG00000164733
WBGene00000785	cpr-5	3.15762	2.04637e-59	1845 - 2386	158 - 208	74.89	6.15333	W07B8.5	CTSB	ENSG00000164733
WBGene00000786	cpr-6	0.108584	0.47864	28117 - 33224	23206 - 26865	980.633	737.117	C25B8.3	CTSB	ENSG00000164733
WBGene00000787	cps-6	-0.170647	0.448264	1674 - 1891	1483 - 1898	74.3633	66.9833	C41D11.8	ENDOG,EXOG	ENSG00000167136,ENSG00000157036
WBGene00000788	cpz-1	0.288785	0.0281211	7361 - 8242	4834 - 6503	354.143	237.93	F32B5.8	CTSZ	ENSG00000101160
WBGene00000789	cpz-2	0.158567	0.245195	2175 - 2283	1552 - 2014	58.0333	42.1667	M04G12.2	CTSZ	ENSG00000101160
WBGene00000792	crb-1	0.829591	0.000562225	544 - 716	219 - 456	4.56333	2.05333	F11C7.4	CRB1,CRB2,JAG1,DLL4,JAG2,DLL1,NOTCH3,NOTCH2,NOTCH1,NOTCH4,EYS,FBN2,FBN3,FBN1,NOTCH4,NOTCH4,NOTCH4,NOTCH4,NOTCH4,NOTCH4	ENSG00000134376,ENSG00000148204,ENSG00000101384,ENSG00000128917,ENSG00000184916,ENSG00000198719,ENSG00000074181,ENSG00000134250,ENSG00000148400,ENSG00000204301,ENSG00000188107,ENSG00000138829,ENSG00000142449,ENSG00000166147,ENSG00000223355,ENSG00000234876,ENSG00000238196,ENSG00000206312,ENSG00000232339,ENSG00000235396
WBGene00000793	crh-1	-0.0885857	0.635785	801 - 816	643 - 803	25.9767	22.5933	Y41C4A.4	CREM,CREB1,ATF1,ATF2,CREB5,ATF7	ENSG00000095794,ENSG00000118260,ENSG00000123268,ENSG00000115966,ENSG00000146592,ENSG00000170653,ENSG00000267281
WBGene00000794	crn-1	-0.51092	0.000199358	3858 - 4356	5101 - 5303	130.517	150.607	Y47G6A.8	FEN1,GEN1	ENSG00000168496,ENSG00000178295
WBGene00000795	crn-2	-0.224645	0.187951	873 - 1042	933 - 955	40.38	38.2	CD4.2	TATDN1,TATDN2,TATDN3	ENSG00000147687,ENSG00000157014,ENSG00000203705
WBGene00000796	crn-3	-0.260307	0.0938518	4707 - 4867	4714 - 5390	73.6967	71.65	C14A4.4	EXOSC10	ENSG00000171824
WBGene00000797	crn-4	-0.540897	0.00227403	490 - 721	664 - 916	20.4333	24.6133	AH9.2	ERI1	ENSG00000104626
WBGene00000798	crn-5	-0.438014	0.0318564	678 - 860	812 - 1026	48.65	53.3067	C14A4.5	EXOSC5	ENSG00000077348
WBGene00000799	crn-6	0.0204225	0.958643	577 - 769	382 - 1003	21.5967	17.6867	K04H4.6	DNASE2B,DNASE2	ENSG00000137976,ENSG00000105612
WBGene00000800	cars-1	-0.4538	0.00743227	7046 - 7843	8056 - 9537	114.977	127.103	Y23H5A.7	CARS,CARS,CARS2	ENSG00000110619,ENSG00000278191,ENSG00000134905
WBGene00000801	cars-2	0.457091	0.0345541	245 - 305	163 - 187	6.71	3.83667	Y23H5A.1
WBGene00000802	crt-1	0.449196	0.00125047	30889 - 36366	18295 - 26294	970.507	580.093	Y38A10A.5	CALR,CALR3	ENSG00000179218,ENSG00000269058
WBGene00000803	csb-1	-0.512984	0.000434106	857 - 910	905 - 1361	10.8833	12.6933	F53H4.1	ERCC6,ERCC6L2,ERCC6L	ENSG00000225830,ENSG00000182150,ENSG00000186871
WBGene00000804	csc-1	-0.226737	0.165345	1754 - 1851	1739 - 1915	83.69	79.0167	Y48E1B.12
WBGene00000812	csk-1	-0.216017	0.123869	2607 - 2622	2343 - 2815	44.5967	41.6767	Y48G1C.2	CSK,MATK	ENSG00000103653,ENSG00000007264
WBGene00000813	csn-1	-0.0717659	0.591365	2513 - 2711	2080 - 2689	54.9633	46.9967	Y59A8A.1	GPS1	ENSG00000169727
WBGene00000814	csn-2	-0.448065	0.000473946	3371 - 4422	4282 - 4985	95.2933	105.98	B0025.2	COPS2	ENSG00000166200
WBGene00000815	csn-3	-0.407889	0.000358181	2646 - 3095	3076 - 3624	68.1833	73.4867	Y38C1AA.2	COPS3	ENSG00000141030
WBGene00000816	csn-4	-0.313151	0.0172787	2605 - 2910	2763 - 3045	65.53	65.57	Y55F3AM.15	COPS4	ENSG00000138663
WBGene00000817	csn-5	-0.501915	8.01968e-05	2579 - 3037	3354 - 3482	96.06	109.72	B0547.1	COPS5	ENSG00000121022
WBGene00000818	csn-6	-0.180929	0.315224	2257 - 2640	2205 - 2461	69.4033	62.9667	Y67H2A.6	COPS6	ENSG00000168090
WBGene00000819	csp-1	-0.303837	0.486692	36 - 38	36 - 50	1.17333	1.49667	Y48E1B.13	CASP2,CASP1,CASP5,CASP4,CASP12,CASP14,CASP9,CASP8,CASP3,CASP7	ENSG00000106144,ENSG00000137752,ENSG00000137757,ENSG00000196954,ENSG00000204403,ENSG00000105141,ENSG00000132906,ENSG00000064012,ENSG00000164305,ENSG00000165806
WBGene00000820	csp-2	0.363029	0.526572	17 - 25	11 - 18	0.32	0.156667	Y73B6BL.7	CASP14,CASP2,CASP9,CASP1,CASP5,CASP4,CASP12,DSP,PPL,MACF1,DST,EVPL,PLEC,EVPLL,EPPK1	ENSG00000105141,ENSG00000106144,ENSG00000132906,ENSG00000137752,ENSG00000137757,ENSG00000196954,ENSG00000204403,ENSG00000096696,ENSG00000118898,ENSG00000127603,ENSG00000151914,ENSG00000167880,ENSG00000178209,ENSG00000214860,ENSG00000261150
WBGene00000822	csq-1	0.733496	6.60689e-11	3257 - 3539	1597 - 2141	95.2733	46.3333	F40E10.3	CASQ1,CASQ2	ENSG00000143318,ENSG00000118729
WBGene00000829	ctb-1	1.16458	5.27891e-10	7139 - 10327	2653 - 4733	333.94	120.35	MTCE.21	MT-CYB	ENSG00000198727
WBGene00000830	ctl-1	-0.422606	0.296356	33 - 54	45 - 61	30.1633	31.9167	Y54G11A.6	CAT	ENSG00000121691
WBGene00000831	ctl-2	-0.407691	0.00413761	1170 - 1307	1359 - 1490	36.06	38.61	Y54G11A.5	CAT	ENSG00000121691
WBGene00000832	ctn-1	0.779755	8.62271e-08	1041 - 1049	448 - 666	18.6367	9.06	Y23H5A.5	CTNNAL1	ENSG00000119326
WBGene00000833	cts-1	0.0266903	0.893166	19190 - 22091	16936 - 17448	501.05	395.777	T20G5.2	CS	ENSG00000062485
WBGene00000834	cua-1	-0.0604214	0.711508	3133 - 3389	2618 - 3162	33.3933	28.07	Y76A2A.2	ATP7A,ATP7B	ENSG00000165240,ENSG00000123191
WBGene00000835	cuc-1	0.0730888	0.689005	1008 - 1192	817 - 963	133.517	101.667	ZK652.11	ATOX1	ENSG00000177556
WBGene00000836	cul-1	-0.0295236	0.844672	4366 - 4545	3537 - 4433	66.87	55.3	D2045.6	CUL1	ENSG00000055130
WBGene00000837	cul-2	-0.257243	0.0754534	5911 - 6246	5874 - 6764	81.7933	79.1633	ZK520.4	CUL2	ENSG00000108094
WBGene00000838	cul-3	-0.373824	0.0301116	7044 - 7382	7571 - 9352	114.89	120.4	Y108G3AL.1	CUL3	ENSG00000036257
WBGene00000839	cul-4	-0.0816014	0.574703	2692 - 3140	2380 - 3078	42.68	36.82	F45E12.3	CUL4A,CUL4B	ENSG00000139842,ENSG00000158290
WBGene00000840	cul-5	-0.0946052	0.488776	2468 - 2601	2076 - 2602	37.93	33.1	ZK856.1	CUL5	ENSG00000166266
WBGene00000841	cul-6	0.104018	0.691845	244 - 360	211 - 306	5.36	4.04333	K08E7.7	CUL1	ENSG00000055130
WBGene00000843	cup-2	-0.47822	0.00044464	2994 - 3609	3827 - 3950	151.557	171.237	F25D7.1	DERL1	ENSG00000136986
WBGene00000845	cup-4	0.726117	0.00085211	276 - 359	127 - 201	9.27	4.40667	C02C2.3
WBGene00000846	cup-5	-0.523362	4.13838e-05	2403 - 2831	3004 - 3355	46.3567	54.0733	R13A5.1	MCOLN3,MCOLN1,MCOLN2	ENSG00000055732,ENSG00000090674,ENSG00000153898
WBGene00000851	cut-1	-0.272965	0.693747	4 - 9	5 - 13	0.166667	0.193333	C47G2.1
WBGene00000853	cut-6	0.145982	0.733444	52 - 74	44 - 57	1.41667	1.02333	M142.2
WBGene00000854	cux-7	-0.0964065	0.492526	1684 - 1880	1486 - 1788	42.1933	36.6133	C07H6.8	AKAP17A	ENSG00000197976
WBGene00000857	cwn-1	0.310284	0.145512	381 - 434	232 - 388	12.9233	8.58667	K10B4.6	WNT4,WNT2B,WNT7A,WNT7B,WNT3,WNT3A,WNT3,WNT3	ENSG00000162552,ENSG00000134245,ENSG00000154764,ENSG00000188064,ENSG00000108379,ENSG00000154342,ENSG00000277626,ENSG00000277641
WBGene00000858	cwn-2	0.59874	0.0196166	210 - 278	105 - 195	7.45667	3.90333	W01B6.1	WNT5B,WNT5A,WNT2B	ENSG00000111186,ENSG00000114251,ENSG00000134245
WBGene00000859	cwp-1	-0.0520434	1	0 - 2	0 - 5	0.19	0.216667	C37H5.10
WBGene00000860	cwp-2	0.214583	1	3 - 5	0 - 6	0.45	0.23	C37H5.11
WBGene00000862	cwp-4	0.8838	0.0818653	23 - 34	9 - 13	0.81	0.313333	K11D12.1
WBGene00000863	cya-1	-0.179564	0.164745	3235 - 3653	2841 - 4102	65.53	60.5	ZK507.6	CCNA1,CCNA2,CCNB1,CCNB2	ENSG00000133101,ENSG00000145386,ENSG00000134057,ENSG00000157456
WBGene00000864	cya-2	-0.777327	0.0324497	47 - 69	79 - 120	3.77	5.16667	F59H6.7
WBGene00000865	cyb-1	-0.290208	0.0195753	8584 - 9139	9232 - 9840	243.25	240.81	ZC168.4	CCNB1,CCNB2,CCNA1,CCNA2	ENSG00000134057,ENSG00000157456,ENSG00000133101,ENSG00000145386
WBGene00000866	cyb-2.1	-0.895447	6.206e-09	3490 - 4557	6064 - 6669	156.6	236.08	Y43E12A.1	CCNB1,CCNB2,CCNA1,CCNA2	ENSG00000134057,ENSG00000157456,ENSG00000133101,ENSG00000145386
WBGene00000867	cyb-2.2	-0.760042	1.83784e-07	6237 - 7620	9522 - 10273	249.273	341.843	H31G24.4	CCNB1,CCNB2,CCNA1,CCNA2	ENSG00000134057,ENSG00000157456,ENSG00000133101,ENSG00000145386
WBGene00000868	cyb-3	-0.541695	2.51054e-05	22676 - 25554	29909 - 31161	676.163	799.247	T06E6.2	CCNB3	ENSG00000147082
WBGene00000869	cyc-1	-0.165738	0.356839	9184 - 10230	8743 - 9663	266.23	240.8	C54G4.8	CYC1	ENSG00000179091
WBGene00000870	cyd-1	0.595796	0.0305405	787 - 870	314 - 790	18.6767	10.14	Y38F1A.5	CCND3,CCND2,CCND1	ENSG00000112576,ENSG00000118971,ENSG00000110092
WBGene00000871	cye-1	-0.678467	6.12462e-07	4252 - 4557	5946 - 6404	83.1433	107.663	C37A2.4	CCNE1,CCNE2	ENSG00000105173,ENSG00000175305
WBGene00000872	cyk-1	0.122353	0.52939	2322 - 2618	1712 - 2228	21.1233	15.6033	F11H8.4	DIAPH1,DIAPH3,DIAPH2	ENSG00000131504,ENSG00000139734,ENSG00000147202
WBGene00000874	cyk-3	-0.324255	0.0523551	3569 - 3822	3750 - 4429	38.32	38.77	ZK328.1	USP32,USP6,USP15	ENSG00000170832,ENSG00000129204,ENSG00000135655
WBGene00000875	cyk-4	-0.284436	0.0418243	6364 - 6742	6695 - 7083	113.72	112.03	K08E3.6	RACGAP1	ENSG00000161800
WBGene00000876	cyl-1	-0.0691441	0.662271	3447 - 3850	3273 - 3388	90.98	76.9733	C52E4.6	CCNL1,CCNL2	ENSG00000163660,ENSG00000221978
WBGene00000877	cyn-1	-0.296386	0.08458	3448 - 3877	3707 - 4278	241.303	238.827	Y49A3A.5	PPIF,PPIA,PPIAL4G,PPIAL4D,PPIAL4A,PPIAL4C	ENSG00000108179,ENSG00000196262,ENSG00000236334,ENSG00000256374,ENSG00000263353,ENSG00000263464
WBGene00000878	cyn-2	0.375174	0.417894	42 - 103	32 - 62	4.34	2.67	ZK520.5	PPIF,PPIA,PPIAL4G,PPIAL4D,PPIAL4C,PPIAL4A,PPIAL4F	ENSG00000108179,ENSG00000196262,ENSG00000236334,ENSG00000256374,ENSG00000263464,ENSG00000263353,ENSG00000279782
WBGene00000879	cyn-3	0.0393696	0.807273	5368 - 6180	4541 - 5376	581.49	460.607	Y75B12B.5	PPIF,PPIA,PPIAL4G,PPIAL4D,PPIAL4A,PPIAL4C	ENSG00000108179,ENSG00000196262,ENSG00000236334,ENSG00000256374,ENSG00000263353,ENSG00000263464
WBGene00000880	cyn-4	0.0571411	0.692219	1863 - 2150	1504 - 1947	49.56	38.53	F59E10.2	PPIL2	ENSG00000100023
WBGene00000881	cyn-5	0.32277	0.0158594	10871 - 12836	7297 - 9195	638.12	413.93	F31C3.1	PPIB,PPIC	ENSG00000166794,ENSG00000168938
WBGene00000882	cyn-6	0.608397	0.0185701	1493 - 1773	611 - 1468	98.09	52.8067	F42G9.2	PPIB,PPIC	ENSG00000166794,ENSG00000168938
WBGene00000883	cyn-7	-0.0545305	0.724594	34534 - 41271	31351 - 38110	2701.44	2273.82	Y75B12B.2	PPIF,PPIA,PPIAL4G,PPIAL4D,PPIAL4C,PPIAL4A,PPIAL4F	ENSG00000108179,ENSG00000196262,ENSG00000236334,ENSG00000256374,ENSG00000263464,ENSG00000263353,ENSG00000279782
WBGene00000884	cyn-8	-0.10933	0.537729	926 - 1054	792 - 1215	21.7233	19.2933	D1009.2	PPIG,NKTR,PPIL6	ENSG00000138398,ENSG00000114857,ENSG00000185250
WBGene00000885	cyn-9	-0.454566	0.00535402	1287 - 1557	1574 - 1725	57.1033	62.89	T27D1.1	NKTR,PPIG,PPIL6	ENSG00000114857,ENSG00000138398,ENSG00000185250
WBGene00000886	cyn-10	-0.694891	0.000192218	1353 - 1821	1980 - 2419	124.76	164.97	B0252.4	PPIL3	ENSG00000240344
WBGene00000887	cyn-11	-0.490037	0.000650097	1309 - 1587	1596 - 1811	102.937	117.973	T01B7.4	PPIH	ENSG00000171960
WBGene00000888	cyn-12	-0.794257	1.52787e-05	1738 - 2187	2579 - 3292	150.387	210.007	C34D4.12	PPIL1	ENSG00000137168
WBGene00000889	cyn-13	-0.477529	0.00804979	2933 - 3204	3215 - 3954	147.907	169.41	Y116A8C.34	PPIE	ENSG00000084072
WBGene00000890	sig-7	-0.275144	0.0274148	2006 - 2443	2090 - 2530	61.14	59.9933	F39H2.2	PPIL4	ENSG00000131013
WBGene00000891	cyn-15	-0.158908	0.28362	2399 - 2754	2337 - 2584	45.93	41.5333	Y87G2A.6	PPWD1	ENSG00000113593
WBGene00000892	cyn-16	-0.127625	0.428639	1230 - 1332	1058 - 1344	32.8433	29.03	Y17G7B.9	CWC27	ENSG00000153015
WBGene00000893	cyn-17	2.23542	3.81217e-07	87 - 184	6 - 36	2.9	0.343333	ZC250.1
WBGene00000894	dab-1	-0.344141	0.0163319	8254 - 8728	9004 - 9648	167.6	171.897	M110.5	DAB2,DAB1	ENSG00000153071,ENSG00000173406
WBGene00000895	dac-1	1.06355	0.00539914	68 - 80	16 - 39	2.14333	0.706667	B0412.1	DACH2,DACH1	ENSG00000126733,ENSG00000276644
WBGene00000896	dad-1	-0.449752	0.000266259	3107 - 3693	3666 - 4236	331.673	368.923	F57B10.10	DAD1	ENSG00000129562
WBGene00000897	daf-1	0.148702	0.416348	799 - 925	579 - 827	13.42	10.0333	F29C4.1	TGFBR1,ACVR1C,ACVR1B,ACVR1,BMPR1A,BMPR1B,ACVRL1	ENSG00000106799,ENSG00000123612,ENSG00000135503,ENSG00000115170,ENSG00000107779,ENSG00000138696,ENSG00000139567
WBGene00000898	daf-2	0.00917803	0.973416	3429 - 3962	2184 - 3680	24.3833	19.6967	Y55D5A.5	IGF1R,INSRR,INSR	ENSG00000140443,ENSG00000027644,ENSG00000171105
WBGene00000899	daf-3	0.178309	0.358465	653 - 728	437 - 705	9.31	6.83	F25E2.5	SMAD4	ENSG00000141646
WBGene00000900	daf-4	0.0322372	0.883144	983 - 1130	829 - 981	15.4067	12.0667	C05D2.1	ACVR2B,ACVR2A,AMHR2,TGFBR2	ENSG00000114739,ENSG00000121989,ENSG00000135409,ENSG00000163513
WBGene00000901	daf-5	0.227248	0.166945	698 - 756	471 - 645	11.42	7.95	W01G7.1
WBGene00000902	daf-6	1.29755	6.13668e-06	126 - 143	37 - 54	1.8	0.546667	F31F6.5	PTCHD1,PTCHD3,PTCHD4,PTCHD3	ENSG00000165186,ENSG00000182077,ENSG00000244694,ENSG00000276595
WBGene00000903	daf-7	1.8879	2.28112e-05	158 - 216	12 - 72	4.38333	0.723333	B0412.2	GDF11,MSTN,INHBA,INHBB	ENSG00000135414,ENSG00000138379,ENSG00000122641,ENSG00000163083
WBGene00000904	daf-8	0.288965	0.260644	503 - 582	246 - 552	12.5567	8.22667	R05D11.1	SMAD5,SMAD9,SMAD3,SMAD1,SMAD2	ENSG00000113658,ENSG00000120693,ENSG00000166949,ENSG00000170365,ENSG00000175387
WBGene00000905	daf-9	0.85048	0.0440947	43 - 91	28 - 43	1.57667	0.633333	T13C5.1	CYP2W1	ENSG00000073067,ENSG00000198251,ENSG00000213908
WBGene00000906	daf-10	1.24712	0.00340634	48 - 58	14 - 20	0.553333	0.146667	F23B2.4	IFT122	ENSG00000163913
WBGene00000907	daf-11	1.28656	0.017749	21 - 26	2 - 8	0.253333	0.05	B0240.3
WBGene00000908	daf-12	0.741628	0.00058156	506 - 687	243 - 392	6.31	3.06333	F11A1.3	NR1H4,NR1H3,RARB,NR1H2,RARA,THRB,RARG,NR1I2	ENSG00000012504,ENSG00000025434,ENSG00000077092,ENSG00000131408,ENSG00000131759,ENSG00000151090,ENSG00000172819,ENSG00000144852
WBGene00000910	daf-14	-0.39094	0.0397256	385 - 553	466 - 605	16.55	17.5433	F01G10.8	SMAD4	ENSG00000141646
WBGene00000911	daf-15	-0.122635	0.476199	5112 - 5948	4449 - 5650	37.48	33.05	C10C5.6	RPTOR	ENSG00000141564
WBGene00000912	daf-16	-0.224543	0.117749	3955 - 4062	3782 - 4274	67.2133	64.25	R13H8.1	FOXO3,FOXO1,FOXO4,FOXO6	ENSG00000118689,ENSG00000150907,ENSG00000184481,ENSG00000204060
WBGene00000913	daf-18	-0.514621	2.84471e-05	16970 - 17647	19269 - 23002	205.123	237.673	T07A9.6	PTEN,TPTE2,TPTE	ENSG00000171862,ENSG00000132958,ENSG00000274391
WBGene00000914	daf-19	0.436119	0.0157326	553 - 648	347 - 427	8.88333	5.21333	F33H1.1	RFX3,RFX2,RFX1,RFX4,RFX6	ENSG00000080298,ENSG00000087903,ENSG00000132005,ENSG00000111783,ENSG00000185002
WBGene00000915	daf-21	-0.264045	0.0260205	106477 - 114058	109443 - 120219	1992.23	1935.33	C47E8.5	HSP90AB1,HSP90AA1,HSP90B1	ENSG00000096384,ENSG00000080824,ENSG00000166598,ENSG00000183199
WBGene00000917	daf-25	-0.285934	0.0710804	1006 - 1077	1075 - 1123	32.4533	31.9633	Y48G1A.3	ANKMY2	ENSG00000106524
WBGene00000920	daf-28	1.35107	0.00726921	34 - 71	5 - 25	5.05	1.36667	Y116F11B.1
WBGene00000923	daf-31	-0.660214	0.000134486	1986 - 2550	2887 - 3448	130.407	166.667	K07H8.3	NAA10,NAA11	ENSG00000102030,ENSG00000156269
WBGene00000928	dao-2	1.65741	5.30763e-11	2616 - 3777	546 - 1347	289.073	71.3933	M03A1.7
WBGene00000929	dao-3	0.192842	0.335219	1048 - 1269	741 - 1234	43.9067	31.26	K07E3.3	MTHFD2,MTHFD2L,MTHFD1L,MTHFD1	ENSG00000065911,ENSG00000163738,ENSG00000120254,ENSG00000100714
WBGene00000930	dao-4	0.51473	0.429718	7 - 18	3 - 7	0.563333	0.186667	ZC373.6
WBGene00000931	dao-5	0.171393	0.168609	8321 - 8754	5926 - 7327	126.593	91.2733	C25A1.10	NOLC1	ENSG00000166197
WBGene00000932	dao-6	1.72224	0.000134498	43 - 56	6 - 13	6.27	1.08333	T05G5.12
WBGene00000933	dap-3	-0.260126	0.14331	2164 - 2356	2151 - 2478	74.5333	71.87	C14A4.2	DAP3	ENSG00000132676
WBGene00000934	dat-1	0.820723	0.101891	24 - 44	13 - 14	0.613333	0.22	T23G5.5	SLC6A2,SLC6A3,SLC6A4,SLC6A3	ENSG00000103546,ENSG00000142319,ENSG00000108576,ENSG00000276996
WBGene00000935	daz-1	-0.491291	0.00629043	8786 - 9120	9481 - 12154	179.293	203.16	F56D1.7	BOLL,DAZL,DAZ3,DAZ1,DAZ4,DAZ2	ENSG00000152430,ENSG00000092345,ENSG00000187191,ENSG00000188120,ENSG00000205916,ENSG00000205944
WBGene00000936	dbl-1	0.29121	0.395255	95 - 106	52 - 92	2.44	1.54	T25F10.2	BMP10,BMP5,BMP7,BMP8B,BMP6,BMP8A,GDF1,BMP15,GDF15,NODAL,GDF9,GDF3,CERS1,GDF2,BMP4,BMP2,GDF5	ENSG00000163217,ENSG00000112175,ENSG00000101144,ENSG00000116985,ENSG00000153162,ENSG00000183682,ENSG00000130283,ENSG00000130385,ENSG00000130513,ENSG00000156574,ENSG00000164404,ENSG00000184344,ENSG00000223802,ENSG00000263761,ENSG00000125378,ENSG00000125845,ENSG00000125965
WBGene00000937	dbr-1	-0.316943	0.040852	1644 - 1796	1769 - 1932	41.9467	41.7333	C55B7.8	DBR1	ENSG00000138231
WBGene00000938	dcp-66	-0.324269	0.014567	3374 - 3704	3352 - 4265	48.0167	48.8367	C26C6.5	GATAD2A,GATAD2B,GATAD2B	ENSG00000167491,ENSG00000143614,ENSG00000261992
WBGene00000939	dcr-1	-0.0406822	0.823203	5024 - 5509	3977 - 5131	34.5033	28.66	K12H4.8	DICER1	ENSG00000100697
WBGene00000940	dcs-1	-0.255407	0.123081	1321 - 1484	1434 - 1515	71.0867	67.5433	Y113G7A.9	DCPS	ENSG00000110063
WBGene00000941	ddp-1	-0.344211	0.0458734	1327 - 1585	1563 - 1724	182.62	187.433	Y39A3CR.4	TIMM8A,TIMM8B	ENSG00000126953,ENSG00000150779
WBGene00000942	deb-1	0.816536	3.59757e-08	1780 - 1821	726 - 969	20.5167	9.14667	ZC477.9	VCL	ENSG00000035403
WBGene00000950	deg-1	0.893118	0.0295639	46 - 57	19 - 24	0.713333	0.3	C47C12.6	SCNN1G,SCNN1A,SCNN1D,SCNN1B	ENSG00000166828,ENSG00000111319,ENSG00000162572,ENSG00000168447
WBGene00000951	deg-3	1.0627	0.0211803	53 - 68	10 - 39	1.26	0.403333	K03B8.9	HTR3B,HTR3A,HTR3C,HTR3E,HTR3D,ZACN	ENSG00000149305,ENSG00000166736,ENSG00000178084,ENSG00000186038,ENSG00000186090,ENSG00000186919
WBGene00000952	del-1	1.119	0.0289601	30 - 45	4 - 19	0.7	0.21	E02H4.1	SCNN1G,SCNN1A,SCNN1D,SCNN1B	ENSG00000166828,ENSG00000111319,ENSG00000162572,ENSG00000168447
WBGene00000953	del-2	0.410793	0.286263	58 - 73	35 - 55	1.37333	0.8	F58G6.6
WBGene00000955	des-2	1.01762	0.0208143	72 - 93	16 - 57	1.45667	0.51	T26H10.1	HTR3B,HTR3A,HTR3C,HTR3E,HTR3D,ZACN	ENSG00000149305,ENSG00000166736,ENSG00000178084,ENSG00000186038,ENSG00000186090,ENSG00000186919
WBGene00000958	dgk-1	1.45271	1.46409e-06	189 - 264	51 - 109	3.12667	0.81	C09E10.2	DGKQ	ENSG00000145214
WBGene00000959	dgk-2	0.677353	2.89119e-05	973 - 1050	459 - 729	25.04	12.5067	F46H6.2	DGKE	ENSG00000153933
WBGene00000960	dgk-3	1.60232	0.00457792	12 - 23	1 - 3	0.283333	0.03	F54G8.2	DGKB,DGKG,DGKA	ENSG00000136267,ENSG00000058866,ENSG00000065357
WBGene00000961	dgn-1	0.332942	0.0234391	1593 - 1649	916 - 1425	26.7367	17.3233	T21B6.1	DAG1	ENSG00000173402
WBGene00000962	dhc-1	0.303608	0.0353015	16835 - 18754	10136 - 14242	49.8167	32.69	T21E12.4	DYNC1H1,DYNC2H1,DNAH9,DNAH6,DNAH7,DNAH5,DNAH11,DNAH1,DNAH8,DNAH3,DNAH12,DNAH2,DNAH14,DNAH17,DNAH10	ENSG00000197102,ENSG00000187240,ENSG00000007174,ENSG00000115423,ENSG00000118997,ENSG00000039139,ENSG00000105877,ENSG00000114841,ENSG00000124721,ENSG00000158486,ENSG00000174844,ENSG00000183914,ENSG00000185842,ENSG00000187775,ENSG00000197653
WBGene00000963	dhp-1	0.864868	4.70976e-06	551 - 631	222 - 376	14.9733	6.67	R06C7.3	DPYS,CRMP1,DPYSL2,DPYSL3,DPYSL4,DPYSL5	ENSG00000147647,ENSG00000072832,ENSG00000092964,ENSG00000113657,ENSG00000151640,ENSG00000157851
WBGene00000964	dhp-2	0.868568	0.000162456	265 - 300	100 - 180	7.13667	3.08	C47E12.8	DPYS,CRMP1,DPYSL2,DPYSL3,DPYSL4,DPYSL5	ENSG00000147647,ENSG00000072832,ENSG00000092964,ENSG00000113657,ENSG00000151640,ENSG00000157851
WBGene00000965	dhs-1	-0.596718	0.000211989	1785 - 2161	2367 - 2635	63.8367	77.63	C01G8.3	DHRS12	ENSG00000102796
WBGene00000966	dhs-2	-0.334885	0.242339	100 - 130	116 - 144	3.82	4.12	F55A12.4	HSD17B6,DHRS9,RDH16,SDR9C7,RDH5,BDH1	ENSG00000025423,ENSG00000073737,ENSG00000139547,ENSG00000170426,ENSG00000135437,ENSG00000161267
WBGene00000967	dhs-3	-0.163801	0.218792	1826 - 2064	1748 - 2263	79.7733	73.7533	T02E1.5	SDR16C5	ENSG00000170786
WBGene00000968	dhs-4	-0.446883	0.114517	122 - 157	141 - 240	5.61	6.47333	T05F1.10	SDR16C5	ENSG00000170786
WBGene00000969	dhs-5	0.439145	0.0562604	416 - 500	228 - 412	14.0367	8.44333	F56D1.5	HSDL1,HSD17B3,HSD17B12	ENSG00000103160,ENSG00000130948,ENSG00000149084
WBGene00000970	dhs-6	-0.177201	0.146651	2707 - 3047	2635 - 3262	82.95	75.9433	C17G10.8	HSDL2	ENSG00000119471
WBGene00000971	dhs-7	-1.21709	6.03032e-06	56 - 69	117 - 161	2.14333	4.30667	E04F6.7	WWOX,DHRS12	ENSG00000186153,ENSG00000102796,ENSG00000258466
WBGene00000972	dhs-8	-0.652314	0.000458159	220 - 277	304 - 428	10.6667	13.88	K10H10.3	WWOX,DHRS12	ENSG00000186153,ENSG00000102796,ENSG00000258466
WBGene00000973	dhs-9	-0.20047	0.207014	902 - 1122	994 - 1137	43.0067	39.8367	Y32H12A.3	DHRS1	ENSG00000157379
WBGene00000974	dhs-11	-0.66212	0.000903533	713 - 878	964 - 1253	36.18	46.1667	Y39A1A.11	HSD17B8,HSD17B8,HSD17B8,HSD17B8,HSD17B8,HSD17B8,CBR4	ENSG00000204228,ENSG00000112474,ENSG00000225312,ENSG00000228357,ENSG00000228712,ENSG00000232357,ENSG00000145439
WBGene00000975	dhs-12	-0.07192	0.735457	1235 - 1504	1143 - 1311	68.9067	57.82	K08F4.9
WBGene00000976	dhs-13	-0.426831	0.00816022	2196 - 2398	2551 - 2795	71.9567	78.2333	F36H9.3	DHRS4,DHRS2,DHRS4L2	ENSG00000157326,ENSG00000100867,ENSG00000187630
WBGene00000977	dhs-14	0.469612	0.00851212	517 - 628	288 - 428	26.3967	15.3133	R05D8.8	HSD17B14	ENSG00000087076
WBGene00000978	dhs-15	0.936649	0.100422	12 - 26	4 - 9	0.85	0.25	R05D8.10	HSD17B14	ENSG00000087076
WBGene00000979	dhs-16	0.702796	0.0966756	48 - 67	20 - 40	1.71333	0.79	C10F3.2	HSD17B6,DHRS9,RDH16,SDR9C7,RDH5,BDH1	ENSG00000025423,ENSG00000073737,ENSG00000139547,ENSG00000170426,ENSG00000135437,ENSG00000161267
WBGene00000980	dhs-17	-0.0816176	0.721685	373 - 385	329 - 369	11.3433	8.95667	F29G9.6	DHRS12,WWOX	ENSG00000102796,ENSG00000186153,ENSG00000258466
WBGene00000981	dhs-18	0.183209	0.465404	331 - 370	213 - 380	15.9433	11.5167	C45B11.3	HSDL2	ENSG00000119471
WBGene00000982	dhs-19	0.135977	0.604855	792 - 845	438 - 939	31.6267	23.6933	T11F9.11	SDR16C5	ENSG00000170786
WBGene00000983	dhs-20	-0.63757	0.00472346	150 - 192	207 - 272	4.75	6.07667	F35B12.2	HSD17B6,DHRS9,RDH16,SDR9C7,RDH5,BDH1	ENSG00000025423,ENSG00000073737,ENSG00000139547,ENSG00000170426,ENSG00000135437,ENSG00000161267
WBGene00000984	dhs-21	-0.373881	0.137128	414 - 503	353 - 762	21.7267	23.4333	R11D1.11	DCXR	ENSG00000169738
WBGene00000985	dhs-22	-0.447617	0.000273136	4142 - 4977	4948 - 5721	162.52	180.243	C15H11.4	RDH11,RDH12,RDH13,RDH14,DHRS13,RDH13,RDH13,RDH13,RDH13,RDH13,RDH13,RDH13,RDH13,RDH13	ENSG00000072042,ENSG00000139988,ENSG00000160439,ENSG00000240857,ENSG00000167536,ENSG00000273944,ENSG00000274418,ENSG00000274504,ENSG00000275474,ENSG00000276341,ENSG00000276684,ENSG00000276826,ENSG00000278149,ENSG00000278284
WBGene00000986	dhs-23	0.332892	0.616337	10 - 12	4 - 9	0.443333	0.21	R08H2.1	HSD17B14	ENSG00000087076
WBGene00000987	dhs-24	-0.430565	0.038082	1769 - 1875	1747 - 2431	39.13	42.8333	Y60A3A.10	DHRS12,DHRSX	ENSG00000102796,ENSG00000169084
WBGene00000988	dhs-25	0.572358	0.00343426	575 - 722	306 - 506	25.9433	14.39	F09E10.3	HSD17B8,HSD17B8,HSD17B8,HSD17B8,HSD17B8,HSD17B8,CBR4	ENSG00000204228,ENSG00000112474,ENSG00000225312,ENSG00000228357,ENSG00000228712,ENSG00000232357,ENSG00000145439
WBGene00000989	dhs-26	-1.57579	0.00378998	3 - 12	13 - 51	0.203333	0.976667	ZK816.5	DHRS1	ENSG00000157379
WBGene00000990	dhs-27	0.76506	4.14209e-06	617 - 704	285 - 437	26.0533	12.44	C04F6.5	HSDL1,HSD17B12,HSD17B3	ENSG00000103160,ENSG00000149084,ENSG00000130948
WBGene00000991	dhs-28	0.0854099	0.591163	2574 - 2963	2057 - 2607	79.53	60.8267	M03A8.1	HSD17B4,SCP2D1	ENSG00000133835,ENSG00000132631
WBGene00000992	dhs-29	0.670001	0.00488093	382 - 407	145 - 302	11.5733	5.80333	F27D9.6	HSD17B11	ENSG00000198189
WBGene00000993	dhs-30	-0.234765	0.174403	573 - 666	547 - 748	24.6033	23.74	T25G12.7	DHRS7B,DHRS7C	ENSG00000109016,ENSG00000184544
WBGene00000994	dic-1	-0.186429	0.170443	1528 - 1788	1549 - 1752	21.83	20.1533	F08B4.1	INTS6L,INTS6,SAGE1,CT45A5,CT45A1,CT45A3,CT45A10,CT45A9,CT45A2,CT45A7,CT45A8,CT45A6	ENSG00000165359,ENSG00000102786,ENSG00000181433,ENSG00000228836,ENSG00000268940,ENSG00000269096,ENSG00000269586,ENSG00000270946,ENSG00000271449,ENSG00000273696,ENSG00000278085,ENSG00000278289
WBGene00000995	die-1	0.0182961	0.941366	2568 - 2897	1877 - 3362	39.74	32.5733	C18D1.1
WBGene00000996	dif-1	-0.409992	0.00136593	2571 - 3066	3131 - 3418	108.01	116.08	F49E8.5	SLC25A20	ENSG00000178537
WBGene00000998	dig-1	1.30765	1.98642e-05	784 - 1076	149 - 526	1.15	0.37	K07E12.1	MUC16	ENSG00000181143
WBGene00001000	dim-1	1.5799	1.93992e-17	3841 - 5322	1044 - 1777	117.99	29.69	C18A11.7
WBGene00001001	dis-3	-0.422572	0.00795869	3746 - 4299	4366 - 5087	51.18	55.24	C04G2.6	DIS3,DIS3L	ENSG00000083520,ENSG00000166938
WBGene00001002	div-1	-0.269976	0.0148956	2736 - 3152	2795 - 3472	52.24	51.1433	R01H10.1	POLA2	ENSG00000014138
WBGene00001005	dlc-1	-0.276382	0.0444237	8536 - 10350	9097 - 10475	792.157	777.63	T26A5.9	DYNLL2,DYNLL1	ENSG00000264364,ENSG00000088986
WBGene00001006	dlg-1	1.37554	3.40939e-11	3717 - 4356	935 - 2036	43.2	13.2567	C25F6.2	DLG1,DLG4,DLG2,DLG3	ENSG00000075711,ENSG00000132535,ENSG00000150672,ENSG00000082458
WBGene00001007	dli-1	-0.0593349	0.754482	2530 - 2998	2387 - 2517	74.7567	62.9367	C39E9.14	DYNC1LI2,DYNC1LI1	ENSG00000135720,ENSG00000144635
WBGene00001008	dlk-1	0.429611	0.00218794	1727 - 1807	927 - 1354	29.3533	18.19	F33E2.2	MAP3K13,MAP3K12	ENSG00000073803,ENSG00000139625
WBGene00001016	dna-2	-0.400946	0.0170818	2869 - 3229	3257 - 3835	36.4033	38.8433	F43G6.1	DNA2	ENSG00000138346
WBGene00001017	dnc-1	0.0578596	0.728714	5511 - 5898	4308 - 5151	50.9733	39.73	ZK593.5	DCTN1	ENSG00000204843
WBGene00001018	dnc-2	-0.529716	0.000359815	2642 - 3234	3492 - 3683	102.453	119.05	C28H8.12	DCTN2	ENSG00000175203
WBGene00001019	dnj-1	-0.463642	0.000342593	2461 - 2968	3028 - 3337	65.3433	73.0433	B0035.14	DNAJB12,DNAJB14,DNAJC18	ENSG00000148719,ENSG00000164031,ENSG00000170464
WBGene00001020	dnj-2	-0.451776	0.000189142	1324 - 1528	1618 - 1850	52.3567	57.8333	B0035.2	DNAJC25,DNAJC25-GNG10	ENSG00000059769,ENSG00000244115
WBGene00001021	dnj-3	-0.43909	0.0797296	215 - 281	255 - 329	16.11	17.74	C01G10.12
WBGene00001022	dnj-4	-0.28519	0.0991156	646 - 734	702 - 728	25.99	26.01	C01G8.4	DNAJC4	ENSG00000110011
WBGene00001023	dnj-5	-0.513285	0.000236679	12262 - 12717	14330 - 16802	154.773	179.67	C04A2.7	DNAJC14	ENSG00000135392,ENSG00000257390
WBGene00001025	dnj-7	0.271552	0.0904811	1588 - 1704	956 - 1560	33.6233	22.8167	C55B6.2	DNAJC3	ENSG00000102580
WBGene00001026	dnj-8	-0.208975	0.107655	3145 - 3470	3047 - 3586	48.9367	45.9067	C56C10.13	DNAJC16	ENSG00000116138
WBGene00001027	dnj-9	0.144634	0.279937	1430 - 1561	1064 - 1378	29.5967	21.61	F11G11.7	DNAJC11	ENSG00000007923
WBGene00001028	dnj-10	-0.0390439	0.837445	1943 - 2033	1729 - 1817	49.6167	41.3433	F22B7.5	DNAJA3,DNAJA3	ENSG00000103423,ENSG00000276726
WBGene00001029	dnj-11	-0.206543	0.0712929	6228 - 6629	6006 - 6891	124.593	116.633	F38A5.13	DNAJC2	ENSG00000105821
WBGene00001030	dnj-12	-0.227784	0.137127	9662 - 10541	9833 - 10649	179.457	170.113	F39B2.10	DNAJA4,DNAJA1,DNAJA2	ENSG00000140403,ENSG00000086061,ENSG00000069345
WBGene00001031	dnj-13	-0.0490604	0.733864	4841 - 5329	4406 - 4941	149.063	124.953	F54D5.8	DNAJB4,DNAJB1,DNAJB5,DNAJB13,DNAJB9	ENSG00000162616,ENSG00000132002,ENSG00000137094,ENSG00000187726,ENSG00000128590
WBGene00001032	dnj-14	-0.00638842	0.977191	859 - 931	661 - 1040	42.59	35.7033	K02G10.8	DNAJC5,DNAJC5G,DNAJC5B	ENSG00000101152,ENSG00000163793,ENSG00000147570
WBGene00001033	dnj-15	-0.361744	0.0389865	888 - 1126	1046 - 1131	61.7467	65.21	K08D10.2	HSCB	ENSG00000100209
WBGene00001034	dnj-16	-0.345451	0.00902613	2186 - 2786	2550 - 2873	67.8733	69.6433	R74.4	DNAJB9	ENSG00000128590
WBGene00001035	dnj-17	-0.235088	0.129469	1781 - 2005	1888 - 1984	47.2533	44.8967	T03F6.2	DNAJC21	ENSG00000168724
WBGene00001036	dnj-18	-0.469038	0.00328031	819 - 980	1050 - 1112	41.97	46.9767	T04A8.9	DNAJB9,DNAJA3	ENSG00000128590,ENSG00000103423
WBGene00001037	dnj-19	-0.58535	0.000543683	9942 - 11090	12174 - 14578	281.573	341.367	T05C3.5	DNAJA2,DNAJA1,DNAJA4	ENSG00000069345,ENSG00000086061,ENSG00000140403
WBGene00001038	dnj-20	-0.134903	0.286481	4645 - 5052	4167 - 5052	94.2133	78.93	T15H9.7	DNAJB11	ENSG00000090520,ENSG00000283149
WBGene00001039	dnj-21	-0.406695	0.0574696	514 - 561	539 - 693	50.9233	54.3433	T19B4.4	DNAJC15,DNAJC19	ENSG00000120675,ENSG00000205981
WBGene00001040	dnj-22	-0.98432	6.27904e-10	2417 - 2943	4146 - 4785	96.7067	155.073	T23B12.7	DNAJC17	ENSG00000104129
WBGene00001041	dnj-23	-0.523876	2.20042e-06	2512 - 2968	3157 - 3769	117.403	137.2	T24H10.3	DNAJC9	ENSG00000213551
WBGene00001042	dnj-24	0.142123	0.554933	310 - 369	220 - 329	18.74	13.7733	W03A5.7	DNAJB6,DNAJB2,DNAJB7,DNAJB8	ENSG00000105993,ENSG00000135924,ENSG00000172404,ENSG00000179407
WBGene00001043	dnj-25	-0.258429	0.154386	2317 - 2430	2291 - 2725	38.3333	37.77	W07A8.3	DNAJC6,GAK	ENSG00000116675,ENSG00000178950
WBGene00001044	dnj-26	-0.765707	4.54148e-07	418 - 529	629 - 858	16.65	23.3167	Y39C12A.8	DNAJB12,DNAJB14,DNAJC18	ENSG00000148719,ENSG00000164031,ENSG00000170464
WBGene00001045	dnj-27	0.320968	0.0159141	1278 - 1398	850 - 1120	28.1633	18.29	Y47H9C.5	DNAJC10	ENSG00000077232
WBGene00001046	dnj-28	-0.180636	0.315278	1029 - 1110	1003 - 1133	25.39	23	Y54E10BL.4	DNAJC3	ENSG00000102580
WBGene00001047	dnj-29	-0.161999	0.376549	5562 - 6397	5507 - 6347	91.7467	82.23	Y63D3A.6	SEC63	ENSG00000025796
WBGene00001048	dnj-30	-0.404099	0.0134027	1315 - 1545	1536 - 1687	71.3367	76.3567	Y71F9B.16	DNAJC8	ENSG00000126698
WBGene00001049	dog-1	-0.206896	0.172369	2143 - 2205	2079 - 2289	27.3667	25.4367	F33H2.1	BRIP1,RTEL1-TNFRSF6B	ENSG00000136492,ENSG00000026036
WBGene00001050	dom-3	-0.291408	0.0458975	1005 - 1122	1105 - 1187	40.0267	39.4967	F54C1.2	DXO,DXO,DXO,DXO,DXO,DXO	ENSG00000204348,ENSG00000234798,ENSG00000236765,ENSG00000206346,ENSG00000224313,ENSG00000225682
WBGene00001051	cks-1	-0.616712	1.17695e-05	3576 - 4764	5061 - 5616	258.07	321.04	C09G4.3	CKS1B,CKS2	ENSG00000173207,ENSG00000123975,ENSG00000178556
WBGene00001052	dop-1	1.14405	0.00628262	47 - 71	16 - 24	1.48	0.46	F15A8.5	DRD5,DRD1,ADRA2B	ENSG00000169676,ENSG00000184845,ENSG00000274286
WBGene00001053	dop-2	0.290974	0.428639	77 - 84	45 - 76	1.29	0.866667	K09G1.4	DRD3,DRD2,DRD4	ENSG00000151577,ENSG00000149295,ENSG00000069696
WBGene00001054	dpf-1	0.622031	0.0523105	100 - 137	50 - 80	1.93	0.963333	T23F1.7	FAP,DPP10,DPP4,DPP6,DPP6	ENSG00000078098,ENSG00000175497,ENSG00000197635,ENSG00000130226,ENSG00000282974
WBGene00001055	dpf-2	-1.47685	3.06516e-13	447 - 560	1009 - 1410	7.60667	17.53	C27C12.7	DPP4,FAP,DPP6,DPP10,DPP6	ENSG00000197635,ENSG00000078098,ENSG00000130226,ENSG00000175497,ENSG00000282974
WBGene00001056	dpf-3	-0.279663	0.0429939	7690 - 7834	7743 - 8634	97.4	95.6267	K02F2.1	DPP8,DPP9	ENSG00000074603,ENSG00000142002
WBGene00001057	dpf-4	-0.147709	0.356434	3364 - 3559	3217 - 3445	66.8267	59.7867	F01F1.5	APEH	ENSG00000164062
WBGene00001058	dpf-5	-0.0612112	0.778083	5823 - 6395	4890 - 5900	102.727	85.9533	R11E3.8	APEH	ENSG00000164062
WBGene00001059	dpf-6	0.135628	0.731151	124 - 174	81 - 190	2.46333	1.86667	F44B9.1	APEH	ENSG00000164062
WBGene00001060	dpf-7	-0.301288	0.0326326	1911 - 1970	1949 - 2193	36.44	36.12	R11E3.7
WBGene00001061	dpl-1	-0.205821	0.107696	3356 - 3505	3203 - 3713	61.96	57.78	T23G7.1	TFDP2,TFDP1,TFDP3	ENSG00000114126,ENSG00000198176,ENSG00000183434
WBGene00001063	dpy-1	-0.862588	0.00164939	136 - 167	217 - 321	1.42333	2.19667	M01E10.2
WBGene00001064	dpy-2	2.5975	7.06383e-10	964 - 1713	83 - 233	41.8267	3.88	T14B4.6	MARCO	ENSG00000019169
WBGene00001065	dpy-3	2.45727	1.80268e-12	180 - 409	23 - 58	14.4	1.71	EGAP7.1	C1QTNF2,C1QTNF7,ADIPOQ,OTOL1,C1QTNF9B,C1QTNF9	ENSG00000145861,ENSG00000163145,ENSG00000181092,ENSG00000182447,ENSG00000205863,ENSG00000240654
WBGene00001066	dpy-4	2.22951	6.85863e-13	570 - 1222	91 - 237	37.5733	5.76333	Y41E3.2	MARCO	ENSG00000019169
WBGene00001067	dpy-5	1.77336	0.00177079	2786 - 6888	98 - 883	240.517	16.3667	F27C1.8	SFTPD	ENSG00000133661
WBGene00001068	dpy-6	1.81036	7.54283e-08	228 - 445	44 - 127	3.54	0.743333	F16F9.2	MUC4,MUC16,MUC12,VWF,MUC5B,OTOGL,MUC17,MUC6,OTOG,SSPO	ENSG00000145113,ENSG00000181143,ENSG00000205277,ENSG00000110799,ENSG00000117983,ENSG00000165899,ENSG00000169876,ENSG00000184956,ENSG00000188162,ENSG00000197558,ENSG00000198788,ENSG00000205592
WBGene00001069	dpy-7	3.01483	3.88976e-24	597 - 1188	54 - 134	32.8833	2.70667	F46C8.6	SFTPD	ENSG00000133661
WBGene00001070	dpy-8	2.48536	2.5426e-13	178 - 483	37 - 48	8.24333	0.92	C31H2.2
WBGene00001071	dpy-9	2.28178	1.02632e-06	561 - 1138	54 - 182	34.0267	3.63667	T21D12.2
WBGene00001072	dpy-10	2.30455	2.43722e-23	1267 - 2097	220 - 407	43.5467	6.76333	T14B4.7
WBGene00001073	dpy-11	0.00351149	0.981241	4607 - 5154	4021 - 4634	156.13	126.683	F46E10.9	TMX1,TMX4	ENSG00000139921,ENSG00000125827
WBGene00001074	dpy-13	2.15439	4.12466e-06	671 - 1940	105 - 269	56.5033	6.79333	F30B5.1	C1QTNF2,C1QTNF7,ADIPOQ,OTOL1,C1QTNF9B,C1QTNF9	ENSG00000145861,ENSG00000163145,ENSG00000181092,ENSG00000182447,ENSG00000205863,ENSG00000240654
WBGene00001075	dpy-14	2.44598	7.22106e-22	3868 - 4982	399 - 1107	177.403	24.4333	H27M09.4	MARCO	ENSG00000019169
WBGene00001076	dpy-17	1.90988	7.54898e-07	3647 - 4226	445 - 1301	146.37	26.1767	F54D8.1	COLQ	ENSG00000206561
WBGene00001077	dpy-18	0.8476	2.14789e-05	1479 - 1975	653 - 1138	36.97	16.8167	Y47D3B.10	P4HA1,P4HA2	ENSG00000122884,ENSG00000072682
WBGene00001078	dpy-19	0.352634	0.164492	191 - 221	116 - 189	3.7	2.33	F22B7.10	DPY19L1,DPY19L2,DPY19L4,DPY19L3	ENSG00000173852,ENSG00000177990,ENSG00000156162,ENSG00000178904
WBGene00001079	dpy-20	1.55556	0.000465735	56 - 89	7 - 31	2.03	0.443333	T22B3.1
WBGene00001080	dpy-21	0.469704	0.0127463	1769 - 2111	900 - 1555	17.3133	10.5167	Y59A8B.1	RSBN1,RSBN1L	ENSG00000081019,ENSG00000187257
WBGene00001081	dpy-22	0.425148	0.143061	2142 - 2900	850 - 2399	9.07	5.54333	F47A4.2	MED12L,MED12	ENSG00000144893,ENSG00000184634
WBGene00001082	dpy-23	0.315853	0.0595178	1183 - 1259	717 - 1115	24.6733	16.2833	R160.1	AP2M1	ENSG00000161203
WBGene00001085	dpy-26	0.0183989	0.913592	5180 - 5295	3813 - 5025	51.4933	41.2567	C25G4.5
WBGene00001086	dpy-27	0.697618	0.00185962	1785 - 2115	688 - 1547	16.59	8.31	R13G10.1	SMC4	ENSG00000113810
WBGene00001087	dpy-28	0.198333	0.207661	2909 - 3307	2023 - 2904	25.4767	18.05	Y39A1B.3	NCAPD2	ENSG00000010292
WBGene00001088	dpy-30	-0.463429	0.00165609	3165 - 3800	3699 - 4516	273.577	304.84	ZK863.6	DPY30	ENSG00000162961
WBGene00001089	dre-1	1.08231	6.64071e-10	1278 - 1552	455 - 769	16.98	6.44667	K04A8.6	FBXO11,FBXO10	ENSG00000138081,ENSG00000147912
WBGene00001090	drh-1	0.15061	0.308766	1651 - 1854	1225 - 1576	23.5633	17.5533	F15B10.2	DDX58,IFIH1,DHX58	ENSG00000107201,ENSG00000115267,ENSG00000108771
WBGene00001091	drh-2	0.383595	0.0075146	967 - 1097	619 - 741	13.25	8.12667	C01B10.1
WBGene00001092	dro-1	-0.716905	2.55399e-05	1311 - 1707	2008 - 2321	109.397	145.927	F53A2.5	DR1	ENSG00000117505
WBGene00001093	drp-1	-0.257531	0.116143	5603 - 5996	5699 - 6518	93.6	90.1167	T12E12.4	DNM1L,DNM2,DNM1,DNM3	ENSG00000087470,ENSG00000079805,ENSG00000106976,ENSG00000197959
WBGene00001094	dars-1	-0.221028	0.0684254	9874 - 11677	10485 - 11371	248.117	232.94	B0464.1	DARS	ENSG00000115866
WBGene00001095	dars-2	-0.0899485	0.592683	778 - 919	738 - 888	17.25	14.8533	F10C2.6	DARS2	ENSG00000117593
WBGene00001096	dsc-1	0.373983	0.577631	6 - 20	3 - 11	0.473333	0.243333	C18B12.3	RAX,HESX1,ALX4,ALX3,ALX1	ENSG00000134438,ENSG00000163666,ENSG00000052850,ENSG00000156150,ENSG00000180318
WBGene00001099	dsc-4	0.300474	0.029927	1166 - 1376	753 - 1030	17.4833	11.48	K02D7.4
WBGene00001101	dsh-1	0.586403	0.000332845	1167 - 1243	547 - 930	20.5733	11.13	C34F11.9	DVL2,DVL1,DVL3,DIXDC1	ENSG00000004975,ENSG00000107404,ENSG00000161202,ENSG00000150764
WBGene00001102	dsh-2	-0.212423	0.0590289	3751 - 4068	3507 - 4415	59.4133	55.6633	C27A2.6	DVL2,DVL1,DVL3,DIXDC1	ENSG00000004975,ENSG00000107404,ENSG00000161202,ENSG00000150764
WBGene00001103	dsl-1	-0.746662	0.0478027	62 - 83	68 - 199	4.05	6.11	W09G12.4
WBGene00001104	dsl-2	-0.801536	0.000469561	468 - 505	558 - 1185	20.1433	30.0233	W09G12.1
WBGene00001105	dsl-3	1.17804	8.0582e-05	471 - 639	125 - 338	26.8567	9.25333	Y41D4B.10
WBGene00001107	dsl-5	0.734584	0.143704	26 - 53	12 - 23	1.50667	0.673333	F58B3.8
WBGene00001108	dsl-6	2.77537	3.43789e-17	148 - 195	11 - 21	7.11	0.626667	H02I12.4
WBGene00001109	dsl-7	0.940387	0.0953925	18 - 23	3 - 12	0.583333	0.193333	F15B9.9
WBGene00001110	duo-1	-0.173196	0.302558	1416 - 1472	1225 - 1543	20.37	18.46	F38B7.5	USP29	ENSG00000131864
WBGene00001111	duo-2	0.431928	0.510095	9 - 16	3 - 11	0.243333	0.126667	F29C4.5
WBGene00001112	duo-3	-0.558366	2.46177e-05	2757 - 3263	3565 - 4111	39.7167	47.6967	Y106G6H.12
WBGene00001113	dur-1	1.63786	2.53257e-12	466 - 769	135 - 191	18.2133	5.41667	F25H8.5	SBSN	ENSG00000189001
WBGene00001115	dyb-1	0.702105	0.00628746	163 - 201	85 - 122	3.15667	1.28667	F47G6.1	DTNB,DTNA	ENSG00000138101,ENSG00000134769
WBGene00001116	dyc-1	1.34711	7.77567e-08	193 - 243	63 - 90	2.75	0.816667	C33G3.1	NOS1AP	ENSG00000198929,ENSG00000254706
WBGene00001117	dyf-1	0.73436	0.0834898	75 - 80	20 - 68	1.46333	0.683333	F54C1.5	TTC30B,TTC30A	ENSG00000196659,ENSG00000197557
WBGene00001118	dyf-2	0.9562	0.000968481	137 - 152	43 - 80	1.92	0.82	ZK520.3	WDR19	ENSG00000157796
WBGene00001119	dyf-3	-0.725213	0.00340257	241 - 251	286 - 397	7.85	10.5267	C04C3.5	CLUAP1	ENSG00000103351
WBGene00001121	dyf-5	1.41861	0.00126383	39 - 65	10 - 17	1.18667	0.296667	M04C9.5	MAK,ICK	ENSG00000111837,ENSG00000112144
WBGene00001122	dyf-6	1.16852	0.00232141	56 - 76	20 - 26	2.04333	0.72	F46F6.4	IFT46	ENSG00000118096
WBGene00001123	dyf-7	0.855865	0.00801999	107 - 126	43 - 63	2.66	1.10333	C43C3.3
WBGene00001127	dyf-11	0.10612	0.785268	73 - 94	51 - 81	1.9	1.42333	C02H7.1	TRAF3IP1	ENSG00000204104
WBGene00001129	dyf-13	0.929236	0.0719576	19 - 37	8 - 16	0.646667	0.21	C27H5.7	TTC26	ENSG00000105948
WBGene00001130	dyn-1	0.0378336	0.834525	2213 - 2338	1550 - 2285	28.3367	22.32	C02C6.1	DNM1,DNM2,DNM3,DNM1L,MX1,MX2	ENSG00000106976,ENSG00000079805,ENSG00000197959,ENSG00000087470,ENSG00000157601,ENSG00000183486
WBGene00001131	dys-1	1.0577	2.80039e-05	1251 - 1847	398 - 914	19.0667	8.7	F15D3.1	UTRN,DMD,DRP2,DYTN	ENSG00000152818,ENSG00000198947,ENSG00000102385,ENSG00000232125
WBGene00001132	alp-1	1.201	1.19758e-19	2271 - 2513	738 - 1127	34.0433	11.11	T11B7.4	LDB3,PDLIM5,PDLIM7,PDLIM1	ENSG00000122367,ENSG00000163110,ENSG00000196923,ENSG00000107438
WBGene00001133	eat-2	0.734592	0.237227	9 - 19	1 - 10	0.333333	0.116667	Y48B6A.4	CHRFAM7A,CHRNA7	ENSG00000166664,ENSG00000175344
WBGene00001134	eat-3	-0.01906	0.90735	3593 - 3848	2883 - 3577	45.32	37.37	D2013.5	OPA1	ENSG00000198836
WBGene00001135	eat-4	0.824483	0.0114092	113 - 138	43 - 92	2.20333	1.03667	ZK512.6	SLC17A7,SLC17A6,SLC17A8,SLC17A5	ENSG00000104888,ENSG00000091664,ENSG00000179520,ENSG00000119899
WBGene00001136	eat-5	0.352368	0.533433	22 - 23	11 - 17	0.586667	0.33	F13G3.8
WBGene00001137	eat-6	-0.0471353	0.781694	25151 - 27323	21683 - 24962	325.473	271.7	B0365.3	ATP1A3,ATP1A2,ATP1A1,ATP1A4,ATP12A,ATP4A	ENSG00000105409,ENSG00000018625,ENSG00000163399,ENSG00000132681,ENSG00000075673,ENSG00000105675
WBGene00001145	eat-16	0.898224	2.42978e-06	514 - 574	197 - 341	9.12	3.99333	C16C2.2	RGS9,RGS11	ENSG00000108370,ENSG00000076344
WBGene00001148	eat-20	0.0675834	0.732436	729 - 798	561 - 798	9.33667	7.26	H30A04.1
WBGene00001149	bcat-1	-0.0172504	0.904861	2945 - 2987	2411 - 3010	65.5	53.8733	K02A4.1	BCAT1,BCAT2	ENSG00000060982,ENSG00000105552
WBGene00001151	ech-2	-0.0417209	0.832988	775 - 871	741 - 756	36.3367	29.8133	F38H4.8	ECHDC3	ENSG00000134463
WBGene00001152	ech-3	-0.301678	0.144542	236 - 281	227 - 335	11.4933	11.61	F43H9.1
WBGene00001153	ech-4	-0.340248	0.0276028	2668 - 2923	2992 - 3150	71.9833	73.6067	R06F6.9	ECI2	ENSG00000198721
WBGene00001154	ech-5	-0.25421	0.1288	1428 - 1571	1502 - 1644	54.32	52.4	F56B3.5	AUH,ECHDC2	ENSG00000148090,ENSG00000121310
WBGene00001155	ech-6	-0.185546	0.292526	4234 - 5033	4267 - 4823	165.517	151.283	T05G5.6	ECHS1	ENSG00000127884
WBGene00001156	ech-7	0.551949	0.006655	1923 - 2309	970 - 1859	112.717	62.6667	Y105E8A.4	ECHS1	ENSG00000127884
WBGene00001157	ech-8	-0.24212	0.383238	183 - 188	146 - 271	5.49333	5.30333	F01G10.2	EHHADH,HADH	ENSG00000113790,ENSG00000138796
WBGene00001158	ech-9	-0.116512	0.763067	74 - 123	85 - 98	2.45667	2.07667	F01G10.3	EHHADH,HADH	ENSG00000113790,ENSG00000138796
WBGene00001159	eff-1	1.07621	2.69116e-05	206 - 225	65 - 122	4.23667	1.67667	C26D10.5
WBGene00001160	efk-1	-0.227146	0.140419	3832 - 4150	3845 - 4287	59.1233	56.01	F42A10.4	EEF2K,ALPK1	ENSG00000103319,ENSG00000073331
WBGene00001161	efl-1	-0.178236	0.216204	1980 - 2196	2013 - 2144	60.48	55.4533	Y102A5C.18	E2F4,E2F5,E2F2,E2F3,E2F2	ENSG00000205250,ENSG00000133740,ENSG00000007968,ENSG00000112242,ENSG00000282899
WBGene00001162	efl-2	-0.219668	0.340136	707 - 745	625 - 822	27.44	25.1367	Y48C3A.17	E2F2,E2F1,E2F3,E2F6	ENSG00000007968,ENSG00000101412,ENSG00000112242,ENSG00000169016
WBGene00001163	efn-2	0.901119	0.00018256	206 - 221	79 - 131	9.17333	3.93333	C43F9.8	EFNB3,EFNB2,EFNB1	ENSG00000108947,ENSG00000125266,ENSG00000090776
WBGene00001164	efn-3	-0.379331	0.295998	57 - 77	66 - 80	4.00333	4.34667	F15A2.5	EFNB1,EFNB3,EFNB2	ENSG00000090776,ENSG00000108947,ENSG00000125266
WBGene00001165	efn-4	0.139156	0.508195	293 - 337	221 - 284	10.1067	7.4	F56A11.3
WBGene00001166	eftu-2	-0.265413	0.0244043	9961 - 11174	10148 - 11377	135.643	131.857	ZK328.2	EFTUD2	ENSG00000108883
WBGene00001167	eef-2	-0.0119919	0.947809	140598 - 153456	119483 - 134059	2175.35	1771.59	F25H5.4	EEF2,EFTUD2	ENSG00000167658,ENSG00000108883
WBGene00001168	eef-1A.1	-0.206998	0.217904	246495 - 269770	242509 - 268670	6979.43	6481.2	F31E3.5	EEF1A2,EEF1A1	ENSG00000101210,ENSG00000156508
WBGene00001169	eef-1A.2	0.296821	0.0318269	23403 - 24624	14289 - 21967	585	384.83	R03G5.1	EEF1A2,EEF1A1	ENSG00000101210,ENSG00000156508
WBGene00001170	egl-1	-0.861949	0.00272264	62 - 95	104 - 153	6.46667	10.24	F23B12.9
WBGene00001171	egl-2	1.55637	6.54577e-05	109 - 156	16 - 63	1.59667	0.363333	F16B3.1	KCNH5,KCNH1	ENSG00000140015,ENSG00000143473,ENSG00000284299
WBGene00001172	egl-3	1.45639	7.80247e-17	2026 - 2466	557 - 959	34.81	10.18	C51E3.7	PCSK2	ENSG00000125851
WBGene00001173	egl-4	-0.17405	0.29423	7602 - 8279	7367 - 8415	109.59	99.2967	F55A8.2	PRKG1,PRKG2	ENSG00000185532,ENSG00000138669
WBGene00001174	egl-5	0.690883	0.0401228	79 - 96	37 - 57	3.60333	1.83	C08C3.1
WBGene00001175	egl-6	-0.0557897	0.860129	127 - 155	102 - 154	4.14667	3.55667	C46F4.1
WBGene00001177	egl-8	0.318774	0.0868022	1582 - 1839	925 - 1327	13.3067	8.67667	B0348.4	PLCB4,PLCB2,PLCB3,PLCB1	ENSG00000101333,ENSG00000137841,ENSG00000149782,ENSG00000182621
WBGene00001178	egl-9	0.296122	0.152907	730 - 793	429 - 757	12.3967	7.86667	F22E12.4	EGLN1,EGLN3,EGLN2	ENSG00000135766,ENSG00000129521,ENSG00000269858,ENSG00000268797
WBGene00001179	egl-10	0.406743	0.0768568	500 - 538	234 - 480	9.83333	6.03333	F28C1.2	RGS6,RGS7	ENSG00000182732,ENSG00000182901
WBGene00001182	egl-13	0.0713082	0.794076	205 - 247	175 - 224	4.65	3.68333	T22B7.1	SOX6,SOX5,SOX13,SOX30	ENSG00000110693,ENSG00000134532,ENSG00000143842,ENSG00000039600
WBGene00001184	egl-15	0.782968	0.000460104	377 - 407	144 - 280	4.26333	2.00333	F58A3.2	FGFR3,FGFR2,FGFR1,FGFR4	ENSG00000068078,ENSG00000066468,ENSG00000077782,ENSG00000160867
WBGene00001185	egl-17	1.26112	0.0164349	22 - 37	5 - 8	1.33	0.32	F38G1.2
WBGene00001186	egl-18	-0.0262585	0.887236	997 - 1104	819 - 1059	28.75	23.7433	F55A8.1	GATA1,TRPS1,GATA3,GATA5,GATA4,GATA6,GATA2	ENSG00000102145,ENSG00000104447,ENSG00000107485,ENSG00000130700,ENSG00000136574,ENSG00000141448,ENSG00000179348
WBGene00001187	egl-19	1.13775	5.99867e-06	469 - 589	123 - 272	5.81333	2.08	C48A7.1	CACNA1D,CACNA1F,CACNA1C,CACNA1S,CACNA1A,CACNA1B,CACNA1E	ENSG00000157388,ENSG00000102001,ENSG00000151067,ENSG00000081248,ENSG00000141837,ENSG00000148408,ENSG00000198216
WBGene00001188	egl-20	1.55279	2.12726e-13	350 - 373	82 - 116	6.93333	1.88	W08D2.1	WNT16,WNT11,WNT9A,WNT9B	ENSG00000002745,ENSG00000085741,ENSG00000143816,ENSG00000158955
WBGene00001189	egl-21	1.18497	2.19214e-08	2062 - 2588	652 - 1282	54.4467	19.3267	F01D4.4	CPE,CPN1,CPXM1,CPZ,CPXM2,AEBP1	ENSG00000109472,ENSG00000120054,ENSG00000088882,ENSG00000109625,ENSG00000121898,ENSG00000106624
WBGene00001190	egl-23	0.741324	0.0115737	114 - 122	50 - 64	2.18667	0.983333	Y37A1B.11	KCNK18	ENSG00000186795
WBGene00001193	egl-26	0.451209	0.0362991	345 - 392	180 - 294	11.4333	6.62333	C23H3.1
WBGene00001194	egl-27	-0.24463	0.0461535	5307 - 5547	4869 - 6185	75.8533	73.9967	C04A2.3	RERE,ATN1	ENSG00000142599,ENSG00000111676
WBGene00001196	egl-30	0.735977	9.27883e-08	2841 - 3320	1431 - 1746	55.6567	26.7933	M01D7.7	GNA11,GNAQ,GNA14	ENSG00000088256,ENSG00000156052,ENSG00000156049
WBGene00001202	egl-36	0.357298	0.422589	39 - 56	29 - 33	0.976667	0.58	R07A4.1	KCNC1,KCNC2,KCNC4,KCNC3	ENSG00000129159,ENSG00000166006,ENSG00000116396,ENSG00000131398
WBGene00001204	egl-38	0.926494	0.0161484	60 - 62	19 - 30	2.70333	1.00667	C04G2.7	PAX2,PAX8,PAX5	ENSG00000075891,ENSG00000125618,ENSG00000196092
WBGene00001207	egl-43	0.683914	0.00314968	202 - 236	91 - 143	5.84	2.80667	R53.3	MECOM,PRDM16	ENSG00000085276,ENSG00000142611
WBGene00001208	egl-44	0.29965	0.0560836	855 - 1055	556 - 800	18.7167	12.19	F28B12.2	TEAD1,TEAD3,TEAD4,TEAD2	ENSG00000187079,ENSG00000007866,ENSG00000197905,ENSG00000074219
WBGene00001209	egl-45	-0.0927404	0.628379	11848 - 13230	10721 - 12966	139.56	120.137	C27D11.1	EIF3A	ENSG00000107581
WBGene00001210	egl-46	2.04223	2.49109e-09	98 - 127	14 - 26	4.05667	0.653333	K11G9.4	INSM1,INSM2	ENSG00000173404,ENSG00000168348
WBGene00001211	egl-47	0.531772	0.387422	12 - 17	4 - 10	0.363333	0.14	C50H2.2
WBGene00001214	ego-1	-0.00384549	0.982955	3555 - 3854	2837 - 3404	27.84	22.6233	F26A3.3	LDHD	ENSG00000166816
WBGene00001215	ego-2	0.186492	0.280239	2245 - 2525	1448 - 2057	18.9433	13.3867	Y53H1C.2	PTPN23	ENSG00000076201
WBGene00001224	ehs-1	-0.46578	0.0147572	2664 - 2879	2851 - 3612	38.3767	42.53	ZK1248.3	EPS15L1,EPS15,REPS1,REPS2	ENSG00000127527,ENSG00000085832,ENSG00000135597,ENSG00000169891
WBGene00001225	eif-3.B	-0.239303	0.188958	8111 - 9479	8391 - 9724	135.53	129.04	Y54E2A.11	EIF3B	ENSG00000106263
WBGene00001226	eif-3.C	0.0127968	0.936316	10859 - 11011	8701 - 9984	146.867	117.55	T23D8.4	EIF3C,EIF3CL	ENSG00000184110,ENSG00000205609
WBGene00001227	eif-3.D	-0.478396	0.00846709	8156 - 8976	9085 - 11368	197.577	221.73	R08D7.3	EIF3D	ENSG00000100353
WBGene00001228	eif-3.E	-0.314343	0.0648041	5628 - 6123	5819 - 6699	140	140.16	B0511.10	EIF3E	ENSG00000104408
WBGene00001229	eif-3.F	-0.238799	0.0400489	4549 - 5269	4742 - 5416	161.187	154.27	D2013.7	EIF3F,EIF3F	ENSG00000175390,ENSG00000280606,ENSG00000279081
WBGene00001230	eif-3.G	-0.174813	0.261268	3694 - 4215	3855 - 4001	143.947	130.75	F22B5.2	EIF3G	ENSG00000130811
WBGene00001231	eif-3.H	-0.326611	0.0213249	4360 - 4947	4972 - 5125	130.63	132.573	C41D11.2	EIF3H	ENSG00000147677
WBGene00001232	eif-3.I	-0.505952	0.018238	5640 - 6509	5909 - 8153	193.06	220.69	Y74C10AR.1	EIF3I	ENSG00000084623
WBGene00001233	eif-3.K	-0.292672	0.0534218	2925 - 3312	3231 - 3441	158.227	156.897	T16G1.11	EIF3K,EIF3K	ENSG00000178982,ENSG00000282986
WBGene00001234	eif-6	-0.610119	0.000307065	3222 - 3594	4182 - 5028	151.057	186.127	C47B2.5	EIF6	ENSG00000242372,ENSG00000261582
WBGene00001235	elb-1	-0.283016	0.0464444	1056 - 1254	1126 - 1439	102.12	102.277	Y41C4A.10	ELOB	ENSG00000103363
WBGene00001236	elc-1	-0.333832	0.0226119	1181 - 1311	1289 - 1411	111.74	112.647	Y82E9BR.15	ELOC	ENSG00000154582
WBGene00001239	elo-1	-0.251405	0.0712929	7609 - 8595	8034 - 8619	320.06	307.32	F56H11.4	ELOVL6	ENSG00000170522
WBGene00001240	elo-2	0.375269	0.0892848	1556 - 1716	814 - 1651	66.5867	42.2467	F11E6.5	ELOVL3,ELOVL6	ENSG00000119915,ENSG00000170522
WBGene00001241	elo-3	-0.510846	3.99131e-06	3298 - 3623	3969 - 4586	150.24	172.767	D2024.3	ELOVL6,ELOVL3	ENSG00000170522,ENSG00000119915
WBGene00001242	elo-4	1.18258	7.60366e-05	138 - 165	40 - 79	7.4	2.51667	C40H1.4	ELOVL6,ELOVL3	ENSG00000170522,ENSG00000119915
WBGene00001243	elo-5	0.412455	0.0593777	3222 - 3547	1605 - 3344	152.32	93.6367	F41H10.7
WBGene00001244	elo-6	0.229163	0.302441	3328 - 3585	1940 - 3793	157.7	110.63	F41H10.8
WBGene00001245	elo-7	0.411374	0.537089	3 - 13	2 - 7	0.313333	0.156667	F56H11.3	ELOVL4,ELOVL7,ELOVL2	ENSG00000118402,ENSG00000164181,ENSG00000197977
WBGene00001246	elo-8	0.526447	0.415614	5 - 16	4 - 6	0.97	0.336667	Y47D3A.30
WBGene00001247	elo-9	0.435921	0.208003	120 - 134	50 - 121	4.07667	2.35	Y53F4B.2	ELOVL6,ELOVL3	ENSG00000170522,ENSG00000119915
WBGene00001248	elp-1	0.264481	0.252631	251 - 255	153 - 198	3.61667	2.41333	F38A6.2	EML2,EML1,EML3,EML4,EML5,EML6	ENSG00000125746,ENSG00000066629,ENSG00000149499,ENSG00000143924,ENSG00000165521,ENSG00000214595
WBGene00001249	elt-1	0.114245	0.612413	571 - 590	352 - 629	13.21	9.99	W09C2.1	GATA3,GATA1,GATA2,TRPS1,GATA4,GATA6	ENSG00000107485,ENSG00000102145,ENSG00000179348,ENSG00000104447,ENSG00000136574,ENSG00000141448
WBGene00001250	elt-2	-0.0455409	0.831619	418 - 457	350 - 462	10.76	9.13	C33D3.1	TRPS1	ENSG00000104447
WBGene00001251	elt-3	0.634514	0.0171237	513 - 590	212 - 496	18.3767	9.55333	K02B9.4
WBGene00001252	elt-4	-0.657416	0.228438	9 - 16	18 - 21	1.47333	2.20333	C39B10.6	TRPS1	ENSG00000104447
WBGene00001253	elt-6	0.123008	0.697322	130 - 152	94 - 118	3.94667	2.84667	F52C12.5	GATA1,TRPS1,GATA3,GATA5,GATA4,GATA6,GATA2	ENSG00000102145,ENSG00000104447,ENSG00000107485,ENSG00000130700,ENSG00000136574,ENSG00000141448,ENSG00000179348
WBGene00001258	emb-4	0.233295	0.151383	5068 - 5771	3254 - 4692	53.3833	37.4967	Y80D3A.2	AQR	ENSG00000021776
WBGene00001259	emb-5	-0.101808	0.557713	12969 - 13780	9964 - 13928	107.443	93.97	T04A8.14	SUPT6H	ENSG00000109111
WBGene00001262	emb-8	-0.534646	4.40667e-05	4601 - 4943	5851 - 6139	83.9	97.8867	K10D2.6	POR	ENSG00000127948
WBGene00001263	emb-9	1.07743	9.74364e-10	8907 - 9926	3235 - 4637	69.3567	26.0167	K04H4.1	COL4A2,COL4A3,COL4A1,COL4A5,COL4A6,COL11A1,COL5A3,COL4A4,COL1A1,COL5A1,COL2A1,COL1A2,COL3A1,COL24A1,COL27A1,COL11A2,COL5A2,COL19A1,COL16A1,COL22A1,COL7A1,COL11A2,COL11A2,COL11A2,COL11A2,COL11A2,COL11A2	ENSG00000134871,ENSG00000169031,ENSG00000187498,ENSG00000188153,ENSG00000197565,ENSG00000060718,ENSG00000080573,ENSG00000081052,ENSG00000108821,ENSG00000130635,ENSG00000139219,ENSG00000164692,ENSG00000168542,ENSG00000171502,ENSG00000196739,ENSG00000204248,ENSG00000204262,ENSG00000082293,ENSG00000084636,ENSG00000169436,ENSG00000114270,ENSG00000206290,ENSG00000223699,ENSG00000227801,ENSG00000230930…
WBGene00001281	emb-27	-0.0120506	0.935797	2722 - 3006	2378 - 2732	55.43	45.2367	F10B5.6	CDC16	ENSG00000130177
WBGene00001284	emb-30	-0.0196837	0.910306	3084 - 3390	2691 - 2998	34.79	28.5933	F54C8.3
WBGene00001303	emo-1	-0.0258869	0.885455	5712 - 6672	5071 - 5826	684.023	564.77	F32D8.6	SEC61G	ENSG00000132432
WBGene00001309	emr-1	-0.650676	2.51054e-05	2665 - 3094	3640 - 4088	202.867	256.633	M01D7.6
WBGene00001310	end-1	-1.03597	0.0107067	29 - 35	45 - 111	1.97333	3.61	F58E10.2
WBGene00001311	end-3	-0.445834	0.394655	15 - 24	21 - 29	0.903333	1.11667	F58E10.5
WBGene00001320	ent-1	-0.628209	1.09152e-06	5206 - 5955	7378 - 7440	136.723	171.377	ZK809.4	SLC29A3,SLC29A1,SLC29A2	ENSG00000198246,ENSG00000112759,ENSG00000174669
WBGene00001324	eor-1	-0.0496988	0.734114	2396 - 2453	2012 - 2422	42.88	36.4467	R11E3.6	ZBTB24,MYNN	ENSG00000112365,ENSG00000085274
WBGene00001325	eor-2	0.392651	0.0164947	1019 - 1091	565 - 920	14.1767	8.65333	C44H4.7
WBGene00001328	epi-1	0.928192	0.0242399	4344 - 5455	1048 - 3447	17.3167	6.85667	K08C7.3	LAMA5,LAMA3,LAMA4,LAMA1,LAMA2,LAMC3,LAMC2,LAMC1	ENSG00000130702,ENSG00000053747,ENSG00000112769,ENSG00000101680,ENSG00000196569,ENSG00000050555,ENSG00000058085,ENSG00000135862
WBGene00001329	epn-1	0.0273811	0.87172	2389 - 2575	1898 - 2594	48.81	38.94	T04C10.2	EPN1,EPN2,EPN3,ENTHD1	ENSG00000063245,ENSG00000072134,ENSG00000049283,ENSG00000176177
WBGene00001330	eps-8	0.419029	0.00161693	1654 - 1685	949 - 1178	28.3133	17.5867	Y57G11C.24	EPS8L1,EPS8,EPS8L2,EPS8L3	ENSG00000131037,ENSG00000151491,ENSG00000177106,ENSG00000198758
WBGene00001331	erd-2	0.311696	0.0606017	1846 - 2048	1056 - 1741	50.2467	32.8867	F09B9.3	KDELR2,KDELR1,KDELR3	ENSG00000136240,ENSG00000105438,ENSG00000100196
WBGene00001332	eri-1	-0.116017	0.359096	1849 - 2084	1655 - 2102	40.6333	35.98	T07A9.5	ERI1	ENSG00000104626
WBGene00001333	erm-1	0.0122819	0.93697	9532 - 9684	7791 - 8903	160.64	128.31	C01G8.5	MSN,EZR,RDX	ENSG00000147065,ENSG00000092820,ENSG00000137710
WBGene00001334	ero-1	-0.264306	0.0663736	2654 - 2813	2840 - 2876	69.4533	67.84	Y105E8B.8	ERO1B,ERO1A	ENSG00000086619,ENSG00000197930
WBGene00001335	erp-1	-0.149378	0.412877	492 - 530	471 - 524	15.6367	14.03	F35A5.8	SH3GLB2,SH3GLB1	ENSG00000148341,ENSG00000097033
WBGene00001336	qars-1	-0.291573	0.118514	6405 - 6582	6078 - 7664	139.73	137.847	Y41E3.4	QARS	ENSG00000172053
WBGene00001337	ears-1	-0.0038294	0.98287	9172 - 9667	7373 - 8754	105.887	85.58	ZC434.5	EPRS	ENSG00000136628
WBGene00001338	ears-2	0.160552	0.291696	756 - 855	585 - 695	21.5133	15.46	T07A9.2	EARS2	ENSG00000103356
WBGene00001340	etr-1	-0.1909	0.232136	2190 - 2469	2227 - 2324	42.7333	39.2467	T01D1.2	CELF2,CELF1,CELF3,CELF5,CELF4,CELF6	ENSG00000048740,ENSG00000149187,ENSG00000159409,ENSG00000161082,ENSG00000101489,ENSG00000140488
WBGene00001345	fos-1	0.577194	0.000530568	723 - 1024	448 - 568	21.61	11.5567	F29G9.4	FOSL2,FOSB,JDP2,ATF3,FOS,FOSL1	ENSG00000075426,ENSG00000125740,ENSG00000140044,ENSG00000162772,ENSG00000170345,ENSG00000175592
WBGene00001352	evl-14	0.0910186	0.593131	4006 - 4460	2764 - 4154	33.4667	25.6433	H38K22.1	PDS5B,PDS5A	ENSG00000083642,ENSG00000121892
WBGene00001358	evl-20	-0.323817	0.076304	476 - 586	566 - 605	37.99	38.4633	F22B5.1	ARL2,ARL2-SNX15	ENSG00000213465,ENSG00000273003
WBGene00001362	exc-1	1.30779	0.0125786	24 - 36	3 - 9	0.466667	0.103333	C46E1.3
WBGene00001365	exc-4	0.19512	0.210151	1048 - 1154	700 - 1019	49.22	34.7333	Y105E8A.22	CLIC2,CLIC5,CLIC4,CLIC3,CLIC1,CLIC6,CLIC1,CLIC1,CLIC1,CLIC1,CLIC1,CLIC1	ENSG00000155962,ENSG00000112782,ENSG00000169504,ENSG00000169583,ENSG00000213719,ENSG00000159212,ENSG00000206394,ENSG00000223639,ENSG00000226248,ENSG00000226417,ENSG00000226651,ENSG00000230685
WBGene00001366	exc-5	0.665321	0.000235537	486 - 545	244 - 310	7.19667	3.60667	C33D9.1	FGD2,FGD1,FGD3,FGD4	ENSG00000146192,ENSG00000102302,ENSG00000127084,ENSG00000139132
WBGene00001368	exc-7	0.23784	0.304569	253 - 297	190 - 210	5.16333	3.51667	F35H8.5	ELAVL2,ELAVL4,ELAVL1,ELAVL3,FAM213B	ENSG00000107105,ENSG00000162374,ENSG00000066044,ENSG00000196361,ENSG00000157870
WBGene00001371	exl-1	-0.0578159	0.772094	583 - 749	570 - 668	38.6	32.06	F26H11.5	CLIC2,CLIC5,CLIC4,CLIC3,CLIC1,CLIC6,CLIC1,CLIC1,CLIC1,CLIC1,CLIC1,CLIC1	ENSG00000155962,ENSG00000112782,ENSG00000169504,ENSG00000169583,ENSG00000213719,ENSG00000159212,ENSG00000206394,ENSG00000223639,ENSG00000226248,ENSG00000226417,ENSG00000226651,ENSG00000230685
WBGene00001372	exo-3	-0.787345	4.04305e-06	2436 - 2678	3460 - 4146	108.447	151.917	R09B3.1	APEX1,APEX2	ENSG00000100823,ENSG00000169188
WBGene00001373	exp-1	0.698222	0.213436	16 - 25	8 - 10	0.423333	0.17	H35N03.1	GABRE,GABRG2,GABRG1,GABRG3	ENSG00000102287,ENSG00000113327,ENSG00000163285,ENSG00000182256
WBGene00001374	exp-2	1.47983	1.55628e-06	118 - 156	34 - 55	3.23	0.936667	F12F3.1	KCNS2,KCNF1,KCNS1,KCNS3,KCNB1,KCNB2,KCNV1,KCNG1,KCNV2	ENSG00000156486,ENSG00000162975,ENSG00000124134,ENSG00000170745,ENSG00000158445,ENSG00000182674,ENSG00000164794,ENSG00000026559,ENSG00000168263
WBGene00001377	eya-1	0.406464	0.269742	287 - 368	123 - 377	7.59	4.73333	C49A1.4	EYA1,EYA2,EYA4,EYA3	ENSG00000104313,ENSG00000064655,ENSG00000112319,ENSG00000158161
WBGene00001385	far-1	-0.0628733	0.782073	17808 - 23565	17568 - 19610	1378.87	1158.76	F02A9.2
WBGene00001386	far-2	-0.637953	2.38476e-06	52988 - 60424	75001 - 82191	4285.72	5396.18	F02A9.3
WBGene00001387	far-3	-1.62465	5.01234e-26	419 - 596	1192 - 1549	35.2833	90.39	F15B9.1
WBGene00001388	far-4	0.405005	0.531984	8 - 22	6 - 10	0.823333	0.416667	F15B9.2
WBGene00001389	far-5	0.122423	0.817896	71 - 76	31 - 113	6.57667	4.98333	F15B9.3
WBGene00001390	far-6	0.211042	0.150192	1888 - 2167	1320 - 1804	94.3467	66.2267	W02A2.2
WBGene00001391	far-7	0.709098	0.0630871	88 - 115	32 - 82	8.85333	4.25	K01A2.2
WBGene00001392	far-8	0.707973	0.228259	1502 - 1670	268 - 1551	89.5367	36.9033	K02F3.3
WBGene00001393	fat-1	-0.230502	0.0935258	11613 - 13504	11666 - 14907	376.773	359.873	Y67H2A.8
WBGene00001394	fat-2	-0.136124	0.309722	23741 - 26665	21571 - 27586	1087.73	990.593	W02A2.1
WBGene00001395	fat-3	0.175441	0.149764	2183 - 2358	1572 - 1997	78.0633	55.2067	W08D2.4	FADS2,FADS1,FADS3	ENSG00000134824,ENSG00000149485,ENSG00000221968
WBGene00001396	fat-4	-0.451805	2.81423e-05	8042 - 9027	8885 - 12249	228.48	258.107	T13F2.1	FADS2,FADS1,FADS3	ENSG00000134824,ENSG00000149485,ENSG00000221968
WBGene00001397	fat-5	-1.02943	1.56705e-09	1149 - 1596	2103 - 2998	23.0567	39.4367	W06D12.3	SCD,SCD5	ENSG00000099194,ENSG00000145284
WBGene00001398	fat-6	-0.174911	0.344243	8853 - 10038	7549 - 13131	345.383	323.24	VZK822L.1	SCD,SCD5	ENSG00000099194,ENSG00000145284
WBGene00001399	fat-7	-2.35613	2.64047e-11	49 - 80	206 - 662	2.27	12.4333	F10D2.9	SCD,SCD5	ENSG00000099194,ENSG00000145284
WBGene00001400	fax-1	0.942318	0.0699395	31 - 34	6 - 22	0.976667	0.326667	F56E3.4
WBGene00001401	fbf-1	-0.213477	0.244691	767 - 843	786 - 838	15.9133	14.98	H12I13.4	PUM2,PUM1	ENSG00000055917,ENSG00000134644
WBGene00001402	fbf-2	-0.0164708	0.939813	556 - 619	493 - 521	10.0933	8.22333	F21H12.5	PUM2,PUM1	ENSG00000055917,ENSG00000134644
WBGene00001403	fbl-1	0.515738	0.0183824	275 - 295	134 - 212	4.81333	2.71	F56H11.1	FBLN1,FBLN2,EFEMP1,FBLN5,EFEMP2	ENSG00000077942,ENSG00000163520,ENSG00000115380,ENSG00000140092,ENSG00000172638
WBGene00001404	fbp-1	-0.0658882	0.655952	3268 - 3748	2976 - 3563	123.367	104.87	K07A3.1	FBP2,FBP1	ENSG00000130957,ENSG00000165140
WBGene00001405	fce-1	-0.395686	0.000979503	2628 - 3002	2906 - 3532	77.77	83.1933	C04F12.10	ZMPSTE24	ENSG00000084073
WBGene00001406	fce-2	-0.0741548	0.747409	570 - 679	516 - 628	20.5633	17.7967	F48F5.5	RCE1	ENSG00000173653
WBGene00001410	feh-1	0.634235	0.043672	138 - 194	70 - 137	2.92333	1.54667	Y54F10AM.2	APBB2,APBB3,APBB1	ENSG00000163697,ENSG00000113108,ENSG00000166313
WBGene00001411	fem-1	0.108846	0.407258	1911 - 2043	1493 - 1770	34.6033	26.3333	F35D6.1	FEM1C,FEM1A,FEM1B,ANKRD16	ENSG00000145780,ENSG00000141965,ENSG00000169018,ENSG00000134461
WBGene00001412	fem-2	-0.449599	0.00515497	3340 - 3527	3790 - 4314	77.4167	85.5033	T19C3.8	PPM1F,PPM1E	ENSG00000100034,ENSG00000175175
WBGene00001413	fem-3	-0.994863	3.49217e-13	1862 - 2380	3512 - 3742	57.2267	92.59	C01F6.4
WBGene00001414	fer-1	0.188303	0.689297	48 - 77	28 - 63	0.406667	0.286667	F43G9.6	DYSF,MYOF,OTOF,FER1L6,FER1L5	ENSG00000135636,ENSG00000138119,ENSG00000115155,ENSG00000214814,ENSG00000249715,ENSG00000088340
WBGene00001423	fib-1	-0.381176	0.0371789	13750 - 15372	14532 - 17985	513.727	538.307	T01C3.7	FBL,FBL,FBLL1	ENSG00000105202,ENSG00000280548,ENSG00000188573
WBGene00001424	fis-1	0.262269	1	0 - 10	0 - 4	0.343333	0.11	F41G3.4	FIS1	ENSG00000214253
WBGene00001425	fis-2	-0.348823	0.0211288	657 - 818	745 - 912	52.7167	54.4933	F13B9.8	FIS1	ENSG00000214253
WBGene00001426	fkb-1	0.01014	0.95223	3238 - 3994	2782 - 3465	305.64	244.663	F36H1.1	FKBP2	ENSG00000173486
WBGene00001427	fkb-2	0.217657	0.138381	6968 - 8324	5125 - 6208	703.293	487.027	Y18D10A.19	FKBP1A,FKBP1B,FKBP1C,FKBP4,FKBP5,FKBP6,FKBP3,FKBP8	ENSG00000088832,ENSG00000119782,ENSG00000198225,ENSG00000004478,ENSG00000096060,ENSG00000077800,ENSG00000100442,ENSG00000105701
WBGene00001428	fkb-3	1.47057	1.77769e-16	1460 - 1621	368 - 666	75.09	21.7133	C05C8.3	FKBP9,FKBP10,FKBP11	ENSG00000122642,ENSG00000141756,ENSG00000134285
WBGene00001429	fkb-4	1.94468	8.67314e-07	122 - 183	12 - 52	6.48	1.1	ZC455.10	FKBP9,FKBP10,FKBP11	ENSG00000122642,ENSG00000141756,ENSG00000134285
WBGene00001430	fkb-5	1.4979	6.86784e-12	900 - 1120	227 - 446	45.9933	12.7833	C50F2.6	FKBP9,FKBP10,FKBP11	ENSG00000122642,ENSG00000141756,ENSG00000134285
WBGene00001431	fkb-6	0.00481819	0.974637	8545 - 9403	7486 - 8222	247.717	199.51	F31D4.3	FKBP4,FKBP5,FKBP6,FKBP1A,FKBP3,FKBP8,FKBP1B	ENSG00000004478,ENSG00000096060,ENSG00000077800,ENSG00000088832,ENSG00000100442,ENSG00000105701,ENSG00000119782
WBGene00001432	fkb-7	0.948781	3.45666e-05	397 - 559	156 - 290	18.87	7.60667	B0511.1	FKBP7,FKBP14	ENSG00000079150,ENSG00000106080
WBGene00001433	fkb-8	0.399458	0.106416	197 - 216	109 - 178	8.04333	4.84333	Y18D10A.25	FKBP1A,FKBP1B,FKBP1C,FKBP4,FKBP6,FKBP5,FKBP3,FKBP8	ENSG00000088832,ENSG00000119782,ENSG00000198225,ENSG00000004478,ENSG00000077800,ENSG00000096060,ENSG00000100442,ENSG00000105701
WBGene00001434	fkh-2	0.151095	0.803122	22 - 43	14 - 39	1.00333	0.74	T14G12.4	FOXG1,FOXA3,FOXD2,FOXD3,FOXD1,FOXL1,FOXC2,FOXE1,FOXS1,FOXL2,FOXE3	ENSG00000176165,ENSG00000170608,ENSG00000186564,ENSG00000187140,ENSG00000251493,ENSG00000176678,ENSG00000176692,ENSG00000178919,ENSG00000179772,ENSG00000183770,ENSG00000186790
WBGene00001435	fkh-3	-0.609714	0.016026	192 - 239	223 - 438	10.6833	13.3467	C29F7.4
WBGene00001436	fkh-4	-0.703381	0.00239398	136 - 165	184 - 296	6.63333	8.99667	C29F7.5
WBGene00001437	fkh-5	-0.0719474	0.887236	42 - 54	30 - 68	1.42	1.23667	F26A1.2
WBGene00001438	fkh-6	-0.480097	0.208031	45 - 60	56 - 74	2.00333	2.33667	B0286.5	FOXG1,FOXI1,FOXI2,FOXI3	ENSG00000176165,ENSG00000248767,ENSG00000168269,ENSG00000186766,ENSG00000214336
WBGene00001439	fkh-7	0.377268	0.101165	750 - 852	371 - 781	19.2533	11.8133	F26D12.1	FOXP1,FOXP2,FOXP4,FOXP3	ENSG00000114861,ENSG00000128573,ENSG00000137166,ENSG00000049768
WBGene00001440	fkh-8	0.0500938	0.883672	119 - 141	94 - 148	4.60333	3.57667	F40H3.4	FOXK2,FOXQ1,FOXK1	ENSG00000141568,ENSG00000164379,ENSG00000164916
WBGene00001441	fkh-9	-0.209493	0.175726	910 - 1036	819 - 1223	22.7633	21.1267	K03C7.2	FOXM1	ENSG00000111206
WBGene00001442	fkh-10	-0.374122	0.530536	10 - 15	12 - 21	0.586667	0.776667	C25A1.2
WBGene00001443	fli-1	0.043091	0.811962	3182 - 3496	2327 - 3160	30.3	23.7233	B0523.5	FLII	ENSG00000177731
WBGene00001444	flp-1	0.839535	0.100596	561 - 620	125 - 502	40.0833	15.46	F23B2.5
WBGene00001445	flp-2	1.14636	0.000674703	89 - 137	31 - 56	10.2467	3.47	W07E11.3
WBGene00001446	flp-3	0.87098	0.0423075	144 - 160	26 - 132	8.95333	3.39333	W07E11.2
WBGene00001447	flp-4	1.05249	0.00178702	125 - 133	30 - 78	11.7633	4.13667	C18D1.3
WBGene00001448	flp-5	1.00586	0.000247334	268 - 322	74 - 180	23.5967	8.95333	C03G5.7
WBGene00001449	flp-6	-0.695471	3.10376e-05	358 - 421	517 - 596	21.78	29.53	F07D3.2
WBGene00001450	flp-7	1.18689	0.000169121	199 - 208	49 - 123	11.57	3.86333	F49E10.3
WBGene00001451	flp-8	1.41899	1.16567e-05	337 - 426	62 - 200	23.21	6.37	F31F6.4
WBGene00001452	flp-9	1.06884	0.000500626	404 - 509	117 - 327	27.7433	10.36	C36H8.3
WBGene00001453	flp-10	-0.0538347	0.869968	184 - 257	144 - 262	13.7667	11.7667	T06C10.4
WBGene00001454	flp-11	1.25789	3.33782e-05	247 - 279	61 - 150	19.7667	6.40667	K02G10.4
WBGene00001455	flp-12	0.450197	0.225362	227 - 251	81 - 268	18.5867	11.2733	C05E11.8
WBGene00001456	flp-13	1.1072	0.0093537	213 - 247	34 - 180	13.52	4.67667	F33D4.3
WBGene00001457	flp-14	0.865402	0.00945185	395 - 503	125 - 381	20.8733	9.19	Y37D8A.15
WBGene00001458	flp-15	1.07623	2.27089e-07	294 - 340	106 - 162	34.69	13.0033	ZK525.1
WBGene00001459	flp-16	0.787016	0.000584731	296 - 356	122 - 213	25.3433	11.8	F15D4.8
WBGene00001460	flp-17	0.133136	0.71681	153 - 166	92 - 203	9.16333	6.97333	C52D10.11
WBGene00001461	flp-18	0.455991	0.145158	270 - 310	117 - 297	14.8033	8.92667	Y48D7A.2
WBGene00001462	flp-19	1.34417	0.000335078	208 - 257	26 - 118	18.7333	5.24667	M79.4
WBGene00001463	flp-20	0.70019	0.0593092	83 - 89	26 - 63	9.04	4.11333	E01H11.3
WBGene00001464	flp-21	0.717387	0.0792444	53 - 69	21 - 47	6.48333	2.95333	C26F1.10
WBGene00001465	flr-1	-0.290717	0.367959	97 - 124	104 - 130	2.21	2.12	F02D10.5	ASIC4,ASIC2,ASIC1,ASIC3,ASIC5	ENSG00000072182,ENSG00000108684,ENSG00000110881,ENSG00000213199,ENSG00000256394
WBGene00001466	flr-2	0.962998	0.0581846	29 - 36	6 - 19	2.59667	1.00333	F58H1.4	GPHA2	ENSG00000149735
WBGene00001468	flr-4	-0.0376315	0.932479	56 - 96	63 - 83	1.56	1.30667	F09B12.6
WBGene00001475	fmi-1	1.9469	7.67463e-21	831 - 980	126 - 249	4.34	0.856667	F15B9.7	CELSR1,CELSR3,CELSR2	ENSG00000075275,ENSG00000008300,ENSG00000143126
WBGene00001476	fmo-1	-0.278999	0.203113	264 - 279	279 - 310	5.91333	5.78667	K08C7.2	FMO5,FMO3,FMO1,FMO2,FMO4	ENSG00000131781,ENSG00000007933,ENSG00000010932,ENSG00000094963,ENSG00000076258,ENSG00000117507,ENSG00000215834
WBGene00001477	fmo-2	-0.551828	0.100036	133 - 183	139 - 236	3.71667	4.46667	K08C7.5	FMO5,FMO3,FMO1,FMO2,FMO4	ENSG00000131781,ENSG00000007933,ENSG00000010932,ENSG00000094963,ENSG00000076258,ENSG00000117507,ENSG00000215834
WBGene00001478	fmo-3	0.316924	0.250786	220 - 265	130 - 243	5.88667	3.92667	Y39A1A.19	FMO5,FMO3,FMO2,FMO1,FMO4	ENSG00000131781,ENSG00000007933,ENSG00000094963,ENSG00000010932,ENSG00000076258,ENSG00000117507,ENSG00000215834
WBGene00001479	fmo-4	0.653595	0.000647091	813 - 1091	458 - 677	20.3233	10.4367	F53F4.5	FMO3,FMO1,FMO2,FMO5,FMO4	ENSG00000007933,ENSG00000010932,ENSG00000094963,ENSG00000131781,ENSG00000076258,ENSG00000117507,ENSG00000215834
WBGene00001480	fmo-5	0.185374	0.46642	242 - 275	162 - 259	6.13333	4.52333	H24K24.5	FMO5,FMO3,FMO2,FMO1,FMO4	ENSG00000131781,ENSG00000007933,ENSG00000094963,ENSG00000010932,ENSG00000076258,ENSG00000117507,ENSG00000215834
WBGene00001481	fog-1	-0.535421	0.0111358	722 - 826	826 - 1090	16.7733	18.6267	Y54E10A.4	CPEB3,CPEB4,CPEB2	ENSG00000107864,ENSG00000113742,ENSG00000137449
WBGene00001482	fog-2	-0.490609	0.000315896	859 - 1086	1108 - 1345	36.2933	41.1867	Y113G7B.5
WBGene00001483	fog-3	0.782499	0.0571426	42 - 83	28 - 29	2.60667	1.07333	C03C11.2	TOB2,TOB1	ENSG00000183864,ENSG00000141232
WBGene00001484	fox-1	-0.0466579	0.84725	522 - 594	425 - 686	12.1467	10.5967	T07D1.4	RBFOX1,RBFOX2,RBFOX3,RBFOX2	ENSG00000078328,ENSG00000100320,ENSG00000167281,ENSG00000277564
WBGene00001485	fre-1	-0.194543	0.319215	1651 - 1793	1544 - 1830	36.4167	33.4033	Y113G7A.8	NDOR1	ENSG00000188566
WBGene00001486	frh-1	-0.69071	0.000364014	291 - 430	468 - 509	24.9067	33.0933	F59G1.7	FXN	ENSG00000165060
WBGene00001487	frk-1	0.458115	0.471644	11 - 26	3 - 16	0.473333	0.246667	T04B2.2	FER,FES,TXK	ENSG00000151422,ENSG00000182511,ENSG00000074966
WBGene00001488	frm-1	-0.0175472	0.925152	5433 - 5856	4518 - 5343	68.1467	60.5767	ZK270.2	EPB41L2,EPB41L1,EPB41L3,EPB41,MUC6	ENSG00000079819,ENSG00000088367,ENSG00000082397,ENSG00000159023,ENSG00000277518
WBGene00001489	frm-2	0.332532	0.0315574	841 - 987	518 - 771	19.25	12.4233	T04C9.6	EPB41L5,EPB41L4B	ENSG00000115109,ENSG00000095203
WBGene00001490	frm-3	1.04948	0.000913865	197 - 252	49 - 116	2.08667	0.75	H05G16.1	FARP2,FARP1,FRMD7	ENSG00000006607,ENSG00000152767,ENSG00000165694
WBGene00001491	frm-4	-0.25858	0.0393412	3460 - 3794	3481 - 3967	55.3	52.5733	C24A11.8	MYLIP,FRMD5,FRMD3	ENSG00000007944,ENSG00000171877,ENSG00000172159
WBGene00001492	frm-5.1	0.37862	0.316905	119 - 168	52 - 124	8.47333	5.5	Y38C1AB.8	PTPN13,FRMPD2,PTPN20	ENSG00000163629,ENSG00000170324,ENSG00000204179
WBGene00001493	frm-7	0.286386	0.0748122	2363 - 2474	1326 - 2172	27.5533	18.4067	C51F7.1	FRMD6,FRMD1	ENSG00000139926,ENSG00000153303
WBGene00001494	frm-8	0.379039	0.132329	211 - 294	157 - 182	3.69333	2.25	H09G03.2	FRMPD1,FRMPD3,FRMPD4	ENSG00000070601,ENSG00000147234,ENSG00000169933
WBGene00001495	frm-9	0.361131	0.219496	119 - 140	71 - 100	3.67333	2.90667	F31B12.3
WBGene00001496	frm-10	-0.375757	0.00344923	2699 - 3423	3163 - 3720	64.9933	68.2533	F25H9.5	FRMD8	ENSG00000126391
WBGene00001497	fars-1	-0.288253	0.106981	4548 - 5037	4584 - 5411	115.6	113.23	T08B2.9	FARSA	ENSG00000179115
WBGene00001498	fars-3	0.0635807	0.62313	5012 - 5302	4082 - 4755	110.753	85.46	F22B5.9	FARSB	ENSG00000116120
WBGene00001499	fsn-1	-0.61555	2.0633e-05	3629 - 4308	5017 - 5360	118.583	146.9	C26E6.5	FBXO45	ENSG00000174013
WBGene00001500	ftn-1	-0.396083	0.162564	98 - 143	120 - 148	8.15	8.72667	C54F6.14	FTH1,FTHL17,FTMT,FTL	ENSG00000167996,ENSG00000132446,ENSG00000181867,ENSG00000087086
WBGene00001501	ftn-2	-0.0966863	0.531731	5005 - 5747	4324 - 6272	361.903	317.183	D1037.3	FTH1,FTMT,FTHL17,FTL	ENSG00000167996,ENSG00000181867,ENSG00000132446,ENSG00000087086
WBGene00001502	ftt-2	0.396699	0.00457792	10282 - 12354	6361 - 8636	435.227	267.227	F52D10.3	YWHAZ,YWHAB,YWHAQ,YWHAH,YWHAG,SFN,YWHAE	ENSG00000164924,ENSG00000166913,ENSG00000134308,ENSG00000128245,ENSG00000170027,ENSG00000175793,ENSG00000108953
WBGene00001503	fum-1	-0.162568	0.450195	6003 - 6917	5347 - 6650	159.873	143.05	H14A12.2	FH	ENSG00000091483
WBGene00001505	fut-1	-0.169097	0.519279	188 - 204	150 - 247	4.94	4.51667	K08F8.3	FUT5,FUT6,FUT3,FUT9,FUT4,FUT7,FUT10,FUT11	ENSG00000130383,ENSG00000156413,ENSG00000171124,ENSG00000172461,ENSG00000196371,ENSG00000180549,ENSG00000172728,ENSG00000196968
WBGene00001506	fut-2	1.33016	0.00926024	29 - 36	3 - 14	1.09667	0.266667	EGAP9.2
WBGene00001507	fut-4	-0.529531	0.289105	15 - 28	23 - 33	0.76	0.946667	K12H6.3	FUT7,FUT4,FUT5,FUT6,FUT3,FUT9,FUT10,FUT11	ENSG00000180549,ENSG00000196371,ENSG00000130383,ENSG00000156413,ENSG00000171124,ENSG00000172461,ENSG00000172728,ENSG00000196968
WBGene00001508	fut-8	-0.0509166	0.859826	282 - 297	204 - 372	5.77667	4.94	C10F3.6	FUT8	ENSG00000033170
WBGene00001509	fzo-1	-0.286229	0.0533083	3155 - 3460	3355 - 3694	51.7033	50.64	ZK1248.14	MFN2,MFN1	ENSG00000116688,ENSG00000171109
WBGene00001510	fzr-1	0.20736	0.176785	2045 - 2235	1383 - 2030	28.25	19.95	ZK1307.6	FZR1,CDC20	ENSG00000105325,ENSG00000117399
WBGene00001511	fzy-1	-0.30597	0.00269089	5948 - 6542	6238 - 7327	136.857	136.75	ZK177.6	FZR1,CDC20,CDC20B	ENSG00000105325,ENSG00000117399,ENSG00000164287
WBGene00001512	gab-1	0.783965	0.0891549	33 - 46	14 - 21	0.833333	0.31	ZC482.1	GABRB3,GABRB2,GABRB1,GABRQ	ENSG00000166206,ENSG00000145864,ENSG00000163288,ENSG00000268089
WBGene00001513	gad-1	-0.209666	0.0544317	4047 - 4567	4081 - 4978	88.62	83.3267	T05H4.14	WDR70	ENSG00000082068
WBGene00001514	xnd-1	-0.348916	0.039222	4347 - 4609	4540 - 5314	76.4367	78.5433	C05D2.5
WBGene00001515	gap-1	0.345951	0.272323	141 - 168	69 - 134	3.17	1.86	T24C12.2	RASA3,RASA2,RASA4,RASAL1,RASA4B,RASA3	ENSG00000185989,ENSG00000155903,ENSG00000105808,ENSG00000111344,ENSG00000170667,ENSG00000280477
WBGene00001516	gap-2	0.30262	0.108029	1770 - 1852	945 - 1761	21.9033	14.6367	ZK899.8	RASAL2,DAB2IP,SYNGAP1,SYNGAP1,RASAL3	ENSG00000075391,ENSG00000136848,ENSG00000197283,ENSG00000227460,ENSG00000105122
WBGene00001517	gar-1	1.14293	0.00515497	53 - 66	15 - 32	1.00667	0.34	C15B12.5	HRH3,HRH4,HRH1	ENSG00000101180,ENSG00000134489,ENSG00000196639
WBGene00001518	gar-2	1.16519	0.000557593	81 - 91	27 - 34	1.55667	0.526667	F47D12.1	HRH3,HRH4,HRH1	ENSG00000101180,ENSG00000134489,ENSG00000196639
WBGene00001519	gar-3	1.12233	0.000596649	97 - 105	29 - 53	1.91	0.68	Y40H4A.1	CHRM1,CHRM3,CHRM2,CHRM5,CHRM4	ENSG00000168539,ENSG00000133019,ENSG00000181072,ENSG00000184984,ENSG00000180720
WBGene00001520	gas-1	0.270524	0.0443926	2947 - 3239	1969 - 2660	75.2367	50.69	K09A9.5	NDUFS2	ENSG00000158864
WBGene00001522	gbh-1	-0.147896	0.487088	372 - 393	305 - 476	11.29	10.3633	D2089.5	BBOX1	ENSG00000129151
WBGene00001523	gbh-2	-0.00374746	0.99083	156 - 192	115 - 223	5.56	4.67	M05D6.7	TMLHE	ENSG00000185973
WBGene00001526	gck-1	-0.055214	0.737484	2175 - 2339	1778 - 2241	30.77	25.9	T19A5.2	STK25,STK24,STK26	ENSG00000115694,ENSG00000102572,ENSG00000134602
WBGene00001527	gcs-1	-0.417699	0.00714732	3944 - 4116	4308 - 5206	69.53	75.0367	F37B12.2	GCLC	ENSG00000001084
WBGene00001532	gcy-5	0.247638	0.706045	11 - 17	9 - 9	0.143333	0.0933333	ZK970.6
WBGene00001533	gcy-6	-0.424705	0.52331	2 - 5	3 - 7	0.03	0.0566667	B0024.6
WBGene00001534	gcy-7	0.84301	0.169294	5 - 14	2 - 4	0.106667	0.0233333	F52E1.4
WBGene00001535	gcy-8	0.908255	0.0334799	60 - 84	15 - 49	0.76	0.293333	C49H3.1
WBGene00001536	gcy-9	0.218406	0.721832	22 - 39	8 - 30	0.29	0.17	ZK455.2
WBGene00001537	gcy-11	1.0901	0.000829178	366 - 425	81 - 273	3.69667	1.38	C30G4.3
WBGene00001538	gcy-12	-0.185679	0.389053	882 - 1043	716 - 1104	7.46667	6.85667	F08B1.2	GUCY2C,GUCY2F,GUCY2D,NPR2,NPR1	ENSG00000070019,ENSG00000101890,ENSG00000132518,ENSG00000159899,ENSG00000169418
WBGene00001539	gcy-13	-0.247161	0.703307	8 - 19	10 - 21	0.143333	0.16	F23H12.6
WBGene00001541	gcy-15	1.50936	0.00572268	19 - 27	2 - 5	0.263333	0.03	ZC239.7
WBGene00001542	gcy-17	-0.177861	0.801503	1 - 6	3 - 5	0.0366667	0.0466667	W03F11.2
WBGene00001543	gcy-18	0.289399	0.43814	72 - 93	55 - 66	0.896667	0.593333	ZK896.8
WBGene00001544	gcy-19	0.286547	0.361453	149 - 176	81 - 164	1.71	1.15	C17F4.6
WBGene00001546	gcy-21	0.747385	0.118816	34 - 49	13 - 30	0.466667	0.196667	F22E5.3
WBGene00001547	gcy-22	0.581753	0.222711	28 - 56	16 - 33	0.493333	0.243333	T03D8.5
WBGene00001548	gcy-23	0.399641	0.429924	28 - 47	18 - 31	0.416667	0.246667	T26C12.4
WBGene00001549	gcy-25	0.606467	0.342894	5 - 16	2 - 5	0.13	0.05	Y105C5B.2
WBGene00001551	gcy-31	0.173989	0.732543	28 - 42	26 - 31	0.766667	0.5	T07D1.1	GUCY1B3	ENSG00000061918,ENSG00000123201
WBGene00001552	gcy-32	1.83834	0.000205174	34 - 39	3 - 10	0.71	0.1	C06B3.8	GUCY1B3	ENSG00000061918,ENSG00000123201
WBGene00001553	gcy-33	0.722103	0.115088	33 - 39	15 - 21	1.37667	0.473333	F57F5.2	GUCY1B3	ENSG00000061918,ENSG00000123201
WBGene00001554	gcy-34	-0.0630945	0.911186	25 - 32	23 - 28	0.503333	0.446667	M04G12.3	GUCY1B3	ENSG00000061918,ENSG00000123201
WBGene00001555	gcy-35	1.04685	0.00741674	58 - 76	18 - 31	1.29667	0.826667	T04D3.4	GUCY1B3	ENSG00000061918,ENSG00000123201
WBGene00001556	gcy-36	1.09232	0.0152307	40 - 50	12 - 18	0.726667	0.246667	C46E1.2	GUCY1B3	ENSG00000061918,ENSG00000123201
WBGene00001557	gcy-37	1.20774	1.82861e-05	123 - 137	45 - 49	2.27333	0.72	C54E4.3	GUCY1B3	ENSG00000061918
WBGene00001558	gdi-1	0.066022	0.649276	11634 - 12873	9502 - 10921	294.323	227.9	Y57G11C.10	GDI1,GDI2	ENSG00000203879,ENSG00000057608
WBGene00001559	gei-1	0.692685	0.00017132	798 - 946	357 - 525	9.98667	4.74333	F45H7.2	STARD8,STARD13,DLC1	ENSG00000130052,ENSG00000133121,ENSG00000164741
WBGene00001560	gei-3	0.318841	0.123124	1011 - 1341	617 - 1014	9.80333	6.70667	T22H6.6	CIC,BBX	ENSG00000079432,ENSG00000114439
WBGene00001561	gei-4	0.0693707	0.677924	3127 - 3533	2534 - 2950	58.19	44.88	W07B3.2
WBGene00001562	lin-66	0.321646	0.0930621	2322 - 2507	1255 - 2346	35.2767	23.3567	B0513.1
WBGene00001563	gei-6	-0.178381	0.241107	3626 - 3899	3351 - 3955	42.6467	39.17	C05C8.4
WBGene00001564	icl-1	-0.362935	0.136612	2285 - 4078	3387 - 3987	40.3333	42.38	C05E4.9
WBGene00001565	gei-8	0.212774	0.351047	1355 - 1591	768 - 1388	9.91	6.98	C14B9.6	NCOR1,NCOR2	ENSG00000141027,ENSG00000196498
WBGene00001566	acdh-13	0.23825	0.0629555	1361 - 1420	941 - 1208	27.8767	19.09	C28C12.9
WBGene00001568	snpc-4	-0.109571	0.388283	3853 - 4023	3401 - 3984	51.2467	44.7033	F32H2.1	SNAPC4	ENSG00000165684
WBGene00001570	gei-13	2.42448	3.80753e-18	450 - 703	53 - 137	8.41667	1.14	F58A4.11
WBGene00001571	gei-14	-0.0899987	0.531731	2112 - 2275	1891 - 2197	37.9467	32.72	K01C8.5
WBGene00001572	gei-15	0.679734	0.000687453	381 - 480	210 - 242	11.7133	5.79333	M03A8.4
WBGene00001574	gei-17	-0.358752	0.0099794	5706 - 6349	6411 - 6947	93.7233	97.43	W10D5.3	PIAS1,PIAS2,PIAS3,PIAS4,ZMIZ1,ZMIZ2	ENSG00000033800,ENSG00000078043,ENSG00000131788,ENSG00000105229,ENSG00000108175,ENSG00000122515
WBGene00001575	gei-18	0.144657	0.842213	8 - 12	2 - 14	0.47	0.3	Y37A1B.15
WBGene00001577	gem-4	0.447388	0.0424832	820 - 1311	518 - 922	21.0567	12.55	T12A7.1	CPNE5,CPNE8,CPNE9,CPNE3,CPNE2,CPNE1,CPNE4,CPNE6	ENSG00000124772,ENSG00000139117,ENSG00000144550,ENSG00000085719,ENSG00000140848,ENSG00000214078,ENSG00000196353,ENSG00000100884
WBGene00001578	ges-1	-1.00572	7.98093e-08	382 - 500	771 - 799	10.1	16.6867	R12A1.4	CES2,CES1	ENSG00000172831,ENSG00000198848
WBGene00001579	gex-2	0.391266	0.0234391	2129 - 2372	1153 - 1976	22.1633	13.7867	F56A11.1	CYFIP2,CYFIP1,CYFIP1	ENSG00000055163,ENSG00000273749,ENSG00000280618
WBGene00001580	gex-3	-0.181973	0.17504	3010 - 3483	2977 - 3349	35.1	32.1167	F28D1.10	NCKAP1,NCKAP1L	ENSG00000061676,ENSG00000123338
WBGene00001581	gfi-1	-0.400917	0.0109259	1708 - 1884	1634 - 2404	42.2233	45.7233	F57F4.3	NOTCH3	ENSG00000074181
WBGene00001582	gfi-2	-0.24182	0.0519453	4147 - 4635	4228 - 4675	77.6633	74.51	K02A11.1	PPP1R16A,PPP1R16B	ENSG00000160972,ENSG00000101445
WBGene00001583	gfi-3	0.131675	0.557713	1009 - 1169	689 - 1220	16.9467	12.6433	M163.4	ANAPC5	ENSG00000089053
WBGene00001584	nrde-4	-0.300069	0.0140575	3338 - 3818	3431 - 4101	53.4533	53.44	F45E4.10
WBGene00001585	gfl-1	-0.538824	0.000343673	1140 - 1339	1419 - 1629	67.0233	79.34	M04B2.3	YEATS4	ENSG00000127337
WBGene00001586	ggr-1	1.44511	0.00464195	24 - 30	5 - 7	0.696667	0.136667	C09G5.1	GABRE,GABRG2,GABRG1,GABRG3	ENSG00000102287,ENSG00000113327,ENSG00000163285,ENSG00000182256
WBGene00001587	ggr-2	0.723729	0.149482	25 - 37	11 - 19	0.536667	0.256667	C45B2.4	GABRE,GABRG2,GABRG1,GABRG3	ENSG00000102287,ENSG00000113327,ENSG00000163285,ENSG00000182256
WBGene00001588	ggr-3	0.486193	0.393933	20 - 23	8 - 18	0.55	0.286667	F09C12.1	GABRE,GABRG2,GABRG1,GABRG3	ENSG00000102287,ENSG00000113327,ENSG00000163285,ENSG00000182256
WBGene00001589	gip-1	-0.103006	0.562816	2190 - 2294	2000 - 2226	31.1333	26.74	H04J21.3
WBGene00001590	lipt-1	-0.614856	2.42233e-05	571 - 717	763 - 913	25.0967	31.7133	C45G3.3	LIPT1	ENSG00000144182
WBGene00001591	glc-1	-0.637319	0.0159578	160 - 228	201 - 401	5.06333	6.70667	F11A5.10	GLRA1,GLRA2,GLRA3,GLRA4,GLRB	ENSG00000145888,ENSG00000101958,ENSG00000145451,ENSG00000188828,ENSG00000109738
WBGene00001592	glc-2	0.606952	0.114674	123 - 146	47 - 136	3.94	1.93333	F25F8.2	GLRA3,GLRA2,GLRA1,GLRA4,GLRB	ENSG00000145451,ENSG00000101958,ENSG00000145888,ENSG00000188828,ENSG00000109738
WBGene00001593	glc-3	0.204609	0.755557	13 - 28	8 - 26	0.41	0.27	ZC317.3	GLRA1,GLRA2,GLRA3,GLRA4,GLRB	ENSG00000145888,ENSG00000101958,ENSG00000145451,ENSG00000188828,ENSG00000109738
WBGene00001594	glc-4	1.67796	1.16567e-05	87 - 102	14 - 37	2.13667	0.476667	C27H5.8	GLRA2,GLRB,GLRA3,GLRA1,GLRA4	ENSG00000101958,ENSG00000109738,ENSG00000145451,ENSG00000145888,ENSG00000188828
WBGene00001595	gld-1	-0.571453	0.000276662	26145 - 27303	31859 - 37689	488.15	583.57	T23G11.3	QKI	ENSG00000112531
WBGene00001596	gld-2	-0.0147526	0.941665	6042 - 6705	4666 - 6082	63.38	51.96	ZC308.1	PAPD4	ENSG00000164329
WBGene00001597	gld-3	-0.451932	0.00129386	9285 - 9952	10966 - 12232	151.073	165.797	T07F8.3
WBGene00001598	glh-1	-0.333219	0.0659012	11541 - 12532	11650 - 14480	194.127	197.16	T21G5.3	DDX4	ENSG00000152670
WBGene00001599	glh-2	0.0538449	0.774096	5111 - 5216	3934 - 4778	68.3333	53.0467	C55B7.1	COL6A1	ENSG00000142156
WBGene00001600	glh-3	-0.321291	0.0458734	2200 - 2294	2307 - 2570	36.26	36.63	B0414.6	DDX4	ENSG00000152670
WBGene00001601	glh-4	-0.234432	0.249827	3292 - 3785	3284 - 4210	55.7933	53.23	T12F5.3	DDX4	ENSG00000152670
WBGene00001602	gln-1	-0.035095	0.863063	649 - 720	517 - 771	20.0433	16.7933	C45B2.5	GLUL	ENSG00000135821
WBGene00001603	gln-2	1.2638	0.0286456	7 - 73	2 - 14	1.25667	0.21	K03H1.1	GLUL	ENSG00000135821
WBGene00001604	gln-3	0.148607	0.351316	3046 - 3523	2419 - 2640	103.617	75.9733	Y105C5B.28	GLUL	ENSG00000135821
WBGene00001605	gln-4	-0.127951	1	2 - 5	2 - 5	0.0633333	0.0966667	T25C8.3
WBGene00001606	gln-5	-0.507569	0.000118634	7384 - 7833	9294 - 9530	242.333	278.927	F26D10.10	GLUL	ENSG00000135821
WBGene00001607	gln-6	-0.774944	6.70432e-07	16185 - 18222	23947 - 27208	473.457	655.29	C28D4.3	GLUL	ENSG00000135821
WBGene00001608	R07B1.8	1.91538	0.000106772	26 - 49	5 - 6	1.10333	0.143333	R07B1.8
WBGene00001609	glp-1	-0.335549	0.0215641	6963 - 7269	6926 - 8537	65.6333	66.8767	F02A9.6	NOTCH3,NOTCH2,NOTCH1,NOTCH4,EYS,NOTCH4,NOTCH4,NOTCH4,JAG1,DLL4,CRB1,CRB2,JAG2,DLL1,SNED1,FBN2,FBN3,FBN1,NOTCH4,NOTCH4,NOTCH4	ENSG00000074181,ENSG00000134250,ENSG00000148400,ENSG00000204301,ENSG00000188107,ENSG00000223355,ENSG00000234876,ENSG00000238196,ENSG00000101384,ENSG00000128917,ENSG00000134376,ENSG00000148204,ENSG00000184916,ENSG00000198719,ENSG00000162804,ENSG00000138829,ENSG00000142449,ENSG00000166147,ENSG00000206312,ENSG00000232339,ENSG00000235396
WBGene00001612	glr-1	1.73681	0.000187513	38 - 62	5 - 13	0.646667	0.1	C06E1.4	GRIA3,GRIA2,GRIA4,GRIA1,GRIK3,GRIK2,GRIK1	ENSG00000125675,ENSG00000120251,ENSG00000152578,ENSG00000155511,ENSG00000163873,ENSG00000164418,ENSG00000171189
WBGene00001613	glr-2	0.533024	0.191022	49 - 68	32 - 35	0.836667	0.42	B0280.12	GRIA3,GRIA2,GRIA4,GRIA1,GRIK3,GRIK2,GRIK1	ENSG00000125675,ENSG00000120251,ENSG00000152578,ENSG00000155511,ENSG00000163873,ENSG00000164418,ENSG00000171189
WBGene00001615	glr-4	0.42545	0.135246	145 - 191	83 - 151	2.14	1.26	C06A8.9	GRIK2,GRIK1,GRIK3,GRIK5,GRIK4,GRIA2,GRIA3,GRIA4,GRIA1	ENSG00000164418,ENSG00000171189,ENSG00000163873,ENSG00000105737,ENSG00000149403,ENSG00000120251,ENSG00000125675,ENSG00000152578,ENSG00000155511
WBGene00001616	glr-5	0.923459	0.0121386	72 - 96	28 - 56	1.06333	0.426667	ZC196.7	GRIK1,GRIK3,GRIK2,GRIK5,GRIK4,GRIA2,GRIA3,GRIA4,GRIA1	ENSG00000171189,ENSG00000163873,ENSG00000164418,ENSG00000105737,ENSG00000149403,ENSG00000120251,ENSG00000125675,ENSG00000152578,ENSG00000155511
WBGene00001617	glr-6	1.08609	1.65917e-05	205 - 215	68 - 97	3.51333	1.34	F41B4.4	GRIK5,GRIK4,GRIK3,GRIK2,GRIK1	ENSG00000105737,ENSG00000149403,ENSG00000163873,ENSG00000164418,ENSG00000171189
WBGene00001618	glr-7	0.596028	0.33471	13 - 18	3 - 10	0.243333	0.11	C43H6.9	GRID2,GRID1	ENSG00000152208,ENSG00000182771
WBGene00001619	glr-8	-0.257377	0.706024	4 - 13	9 - 11	0.18	0.206667	F22A3.3	GRIN1	ENSG00000176884
WBGene00001620	glt-1	0.959496	9.00268e-06	2545 - 3068	918 - 1893	64.2267	26.9667	C12D12.2	SLC1A2,SLC1A3,SLC1A6,SLC1A5,SLC1A1,SLC1A4	ENSG00000110436,ENSG00000079215,ENSG00000105143,ENSG00000105281,ENSG00000106688,ENSG00000115902
WBGene00001621	glt-3	1.45375	6.88278e-05	121 - 140	19 - 62	3.02667	0.756667	K08F4.4	SLC1A2	ENSG00000110436
WBGene00001622	glt-4	0.734307	0.00100068	247 - 293	114 - 154	6.26333	2.89333	T22E5.2	SLC1A6,SLC1A1,SLC1A3,SLC1A5,SLC1A4,SLC1A2,SLC1A7	ENSG00000105143,ENSG00000106688,ENSG00000079215,ENSG00000105281,ENSG00000115902,ENSG00000110436,ENSG00000162383
WBGene00001623	glt-5	0.117369	0.763839	73 - 88	53 - 77	1.80667	1.33	Y53C12A.2	SLC1A2,SLC1A3,SLC1A6,SLC1A1,SLC1A5,SLC1A4	ENSG00000110436,ENSG00000079215,ENSG00000105143,ENSG00000106688,ENSG00000105281,ENSG00000115902
WBGene00001624	glt-6	0.852919	0.0496507	47 - 56	16 - 36	1.17667	0.49	R05G6.6	SLC1A2,SLC1A3,SLC1A6,SLC1A5,SLC1A1,SLC1A4	ENSG00000110436,ENSG00000079215,ENSG00000105143,ENSG00000105281,ENSG00000106688,ENSG00000115902
WBGene00001625	glt-7	1.87336	0.000222253	27 - 43	2 - 8	0.85	0.11	W03G1.1	SLC1A2	ENSG00000110436
WBGene00001627	gly-2	0.491195	0.0875227	141 - 183	79 - 139	3.15667	1.87	C55B7.2	MGAT5,MGAT5B,CCDC126	ENSG00000152127,ENSG00000167889,ENSG00000169193
WBGene00001628	gly-3	-0.373477	0.0108215	3007 - 3123	3309 - 3641	52.1833	54.3433	ZK688.8	GALNT1,GALNT13	ENSG00000141429,ENSG00000144278
WBGene00001629	gly-4	-0.134762	0.461637	1189 - 1418	1152 - 1258	23.47	20.83	Y116F11B.12	GALNT2,GALNT16,GALNT14	ENSG00000143641,ENSG00000100626,ENSG00000158089
WBGene00001630	gly-5	-0.237573	0.0851557	2884 - 3094	2802 - 3199	49.4267	47.4067	Y39E4B.12	GALNT1,GALNT13,GALNT3,GALNT12,GALNT6,GALNT4,POC1B-GALNT4	ENSG00000141429,ENSG00000144278,ENSG00000115339,ENSG00000119514,ENSG00000139629,ENSG00000257594,ENSG00000259075
WBGene00001631	gly-6	0.923888	5.81307e-09	770 - 842	294 - 471	14.12	6.06667	H38K22.5	GALNT13	ENSG00000144278
WBGene00001632	gly-7	-0.289974	0.0343125	3313 - 3466	3404 - 3760	63.4733	62.7667	Y46H3A.6	GALNT7	ENSG00000109586
WBGene00001633	gly-8	0.799933	4.20563e-05	880 - 1176	414 - 660	30.8033	14.13	Y66A7A.6	GALNT18,GALNT8,GALNT15,GALNT9,WBSCR17	ENSG00000110328,ENSG00000130035,ENSG00000131386,ENSG00000182870,ENSG00000185274
WBGene00001635	gly-10	-0.297705	0.0736879	2682 - 2878	2792 - 3160	63.9167	62.8233	Y45F10D.3	GALNT10,GALNTL6	ENSG00000164574,ENSG00000174473
WBGene00001636	gly-11	0.114925	0.646302	218 - 249	168 - 225	4.69	3.58667	Y75B8A.9	GALNT11,GALNTL5	ENSG00000178234,ENSG00000106648
WBGene00001637	gly-12	0.559714	0.0204585	194 - 237	105 - 149	3.92	2.26667	F48E3.1	POMGNT1,MGAT1	ENSG00000085998,ENSG00000131446
WBGene00001638	gly-13	-0.203939	0.19903	608 - 695	594 - 799	15.09	14.2133	B0416.6	MGAT1,POMGNT1	ENSG00000131446,ENSG00000085998
WBGene00001639	gly-14	-0.893889	0.000732658	80 - 111	149 - 182	2.84333	4.31333	M01F1.1	MGAT1,POMGNT1	ENSG00000131446,ENSG00000085998
WBGene00001643	gly-18	0.0669786	0.926927	8 - 17	6 - 14	0.35	0.2	F22D6.11	GCNT3,GCNT1,GCNT2,GCNT7,GCNT4	ENSG00000140297,ENSG00000187210,ENSG00000111846,ENSG00000124091,ENSG00000176928,ENSG00000205318
WBGene00001644	gly-19	0.308079	0.389053	73 - 87	45 - 69	2.19667	1.37333	F22D6.12	GCNT3,GCNT1,GCNT2,GCNT7,GCNT4	ENSG00000140297,ENSG00000187210,ENSG00000111846,ENSG00000124091,ENSG00000176928,ENSG00000205318
WBGene00001645	gly-20	-0.672061	5.29224e-07	3350 - 4163	5039 - 5212	79.67	102.467	C03E10.4	MGAT2	ENSG00000168282
WBGene00001646	gna-1	0.145077	0.673043	210 - 227	114 - 271	16.04	12.06	B0024.12	GNPNAT1	ENSG00000100522
WBGene00001647	gna-2	-0.651235	1.45428e-07	3191 - 4119	4441 - 5499	117.237	149.773	T23G11.2	GNPNAT1	ENSG00000100522
WBGene00001648	goa-1	-0.131634	0.298858	4728 - 4801	4263 - 4955	94.22	83.8667	C26C6.2	GNAO1,GNAI3,GNAI2,GNAI1,GNAT2,GNAT3	ENSG00000087258,ENSG00000065135,ENSG00000114353,ENSG00000127955,ENSG00000134183,ENSG00000214415
WBGene00001649	gob-1	0.0127265	0.945242	1103 - 1208	867 - 1189	24.09	19.51	H13N06.3
WBGene00001650	gon-1	0.557597	0.0223749	603 - 770	254 - 488	3.80667	2.1	F25H8.3	ADAMTS9,ADAMTS20,ADAMTS6,ADAMTS18,ADAMTS16,ADAMTS15,ADAMTS8,ADAMTS7,ADAMTS10,ADAMTS12,ADAMTS1,ADAMTS5,ADAMTS4	ENSG00000163638,ENSG00000173157,ENSG00000049192,ENSG00000140873,ENSG00000145536,ENSG00000166106,ENSG00000134917,ENSG00000136378,ENSG00000142303,ENSG00000151388,ENSG00000154734,ENSG00000154736,ENSG00000158859
WBGene00001651	gon-2	-0.0765573	0.718095	1168 - 1380	892 - 1470	10.27	8.11	T01H8.5	TRPM1,TRPM3,TRPM7,TRPM6,TRPM5,TRPM4,TRPM2,TRPM8	ENSG00000134160,ENSG00000083067,ENSG00000092439,ENSG00000119121,ENSG00000070985,ENSG00000130529,ENSG00000142185,ENSG00000144481
WBGene00001653	gon-4	-0.134567	0.334021	3550 - 3662	2898 - 4172	34.74	31.1867	K04D7.5	GON4L,YY1AP1	ENSG00000116580,ENSG00000163374
WBGene00001660	gop-1	-0.0532873	0.770211	758 - 967	709 - 911	11.14	9.28667	C34E10.3	CLEC16A	ENSG00000038532
WBGene00001661	gop-2	-0.61928	4.14574e-05	1906 - 2499	2837 - 2962	73.57	91.2067	C34E10.2	GPN1	ENSG00000198522
WBGene00001662	gop-3	-0.310017	0.0389762	2735 - 3246	3089 - 3211	77.5967	77.2433	C34E10.1	SAMM50	ENSG00000100347
WBGene00001663	gpa-1	0.605778	0.188984	44 - 71	15 - 44	2.04	1.02333	T19C4.6
WBGene00001664	gpa-2	0.922157	0.0764574	24 - 39	7 - 22	0.986667	0.326667	F38E1.5
WBGene00001665	gpa-3	0.806117	0.0897976	27 - 54	15 - 22	1.11	0.453333	E02C12.5
WBGene00001666	gpa-4	0.0182177	0.961624	115 - 132	84 - 150	2.55333	2.04	T07A9.7	GNAI3,GNAI2,GNAI1,GNAT2,GNAT3,GNAO1,GNAT1,GNAZ	ENSG00000065135,ENSG00000114353,ENSG00000127955,ENSG00000134183,ENSG00000214415,ENSG00000087258,ENSG00000114349,ENSG00000128266
WBGene00001668	gpa-6	0.544001	0.387963	13 - 13	4 - 11	0.39	0.183333	F48C11.1
WBGene00001669	gpa-7	0.601136	0.0217189	155 - 189	81 - 131	6.62333	3.43333	R10H10.5	GNAO1,GNAI3,GNAI2,GNAI1,GNAT2,GNAT3	ENSG00000087258,ENSG00000065135,ENSG00000114353,ENSG00000127955,ENSG00000134183,ENSG00000214415
WBGene00001671	gpa-9	0.569392	0.226832	35 - 39	14 - 26	1.15667	0.616667	F56H9.4
WBGene00001672	gpa-10	0.382237	0.5259	20 - 25	5 - 20	0.746667	0.383333	C55H1.2
WBGene00001673	gpa-11	0.132434	0.84113	15 - 18	7 - 20	0.506667	0.326667	C16A11.1
WBGene00001674	gpa-12	0.188173	0.629171	140 - 165	66 - 182	4.74	3.34333	F18G5.3	GNA12,GNA13	ENSG00000146535,ENSG00000120063
WBGene00001675	gpa-13	-0.388031	0.55369	7 - 7	7 - 14	0.216667	0.23	F18E2.5
WBGene00001676	gpa-14	0.415772	0.44912	22 - 32	11 - 25	0.746667	0.506667	B0207.3
WBGene00001677	gpa-15	0.0943031	0.897234	11 - 15	3 - 19	0.403333	0.346667	M04C7.1
WBGene00001678	gpa-16	-0.36096	0.0151181	1730 - 1892	1795 - 2243	69.05	70.5967	Y95B8A.5	GNAI1,GNAI3,GNAI2,GNAT2,GNAT3,GNAO1,GNAT1,GNAZ	ENSG00000127955,ENSG00000065135,ENSG00000114353,ENSG00000134183,ENSG00000214415,ENSG00000087258,ENSG00000114349,ENSG00000128266
WBGene00001679	gpb-1	-0.00183327	0.991045	4571 - 4646	3876 - 4097	76.4333	62.1233	F13D12.7	GNB1,GNB2,GNB4,GNB3	ENSG00000078369,ENSG00000172354,ENSG00000114450,ENSG00000111664
WBGene00001680	gpb-2	0.986406	3.51643e-09	466 - 533	190 - 261	14.0633	5.73	F52A8.2	GNB5	ENSG00000069966
WBGene00001681	gpc-1	0.947084	0.0354441	36 - 55	13 - 23	2.63	0.853333	K02A4.2	GNG12,GNG7,GNG11,GNG3,GNG8,GNG4,GNG5,GNG2,GNG10,GNG4	ENSG00000172380,ENSG00000176533,ENSG00000127920,ENSG00000162188,ENSG00000167414,ENSG00000168243,ENSG00000174021,ENSG00000186469,ENSG00000242616,ENSG00000282972
WBGene00001682	gpc-2	-0.0719593	0.730534	1497 - 1750	1321 - 1665	110.363	93.79	F08B6.2	GNG13	ENSG00000127588
WBGene00001683	gpd-1	-0.415144	0.0177667	4905 - 5845	5775 - 6803	368.567	395.87	T09F3.3	GAPDH,GAPDHS	ENSG00000111640,ENSG00000105679
WBGene00001684	gpd-2	0.508592	0.00320107	4033 - 5645	2671 - 3329	228.643	128.41	K10B3.8	GAPDH,GAPDHS	ENSG00000111640,ENSG00000105679
WBGene00001685	gpd-3	0.595425	0.000245553	6272 - 8504	3700 - 4758	335.033	177.467	K10B3.7	GAPDH,GAPDHS	ENSG00000111640,ENSG00000105679
WBGene00001686	gpd-4	-0.0939709	0.633829	2547 - 2911	2415 - 2742	186.107	158.827	F33H1.2	GAPDH,GAPDHS	ENSG00000111640,ENSG00000105679
WBGene00001687	gpn-1	1.09733	0.00153824	98 - 136	28 - 68	2.53	0.883333	F59D12.4	GPC4,GPC6,GPC1,GPC2,GPC5,GPC3	ENSG00000076716,ENSG00000183098,ENSG00000063660,ENSG00000213420,ENSG00000179399,ENSG00000147257
WBGene00001688	gpr-1	-0.177363	0.283244	747 - 915	692 - 976	24.42	22.08	F22B7.13
WBGene00001689	gpr-2	-0.258167	0.0874374	898 - 1014	871 - 1202	28.7933	27.57	C38C10.4
WBGene00001690	grd-1	1.50108	0.000267951	52 - 118	18 - 32	0.986667	0.226667	R08B4.1
WBGene00001691	grd-2	2.41871	3.52791e-07	41 - 68	2 - 10	0.78	0.07	F46B3.5	DHH	ENSG00000139549
WBGene00001692	grd-3	0.22909	0.154148	839 - 1048	593 - 793	58.6567	41.1733	W05E7.1
WBGene00001693	grd-4	-1.04563	0.00205131	42 - 51	62 - 118	3.21667	6.04	T01B10.1
WBGene00001694	grd-5	0.469208	0.00916221	987 - 1145	516 - 898	96.7367	56.74	F41E6.2
WBGene00001695	grd-6	1.43396	0.000792233	43 - 68	11 - 19	1.07333	0.256667	T18H9.1
WBGene00001696	grd-7	-0.0835313	0.911532	4 - 7	2 - 8	0.0733333	0.0766667	F46H5.6
WBGene00001699	grd-10	1.82486	7.90492e-10	176 - 245	36 - 72	18.2833	3.88333	F09D12.1
WBGene00001700	grd-11	0.157739	0.814849	10 - 20	7 - 13	0.173333	0.13	K02E2.2
WBGene00001701	grd-12	0.916721	0.0733612	28 - 36	8 - 20	1.53667	0.52	F02D8.2
WBGene00001702	grd-13	2.32578	1.01801e-12	261 - 564	41 - 94	29.6867	4.09	W05E7.3
WBGene00001703	grd-14	1.09737	4.40798e-08	384 - 457	138 - 218	18.9	7.12333	T01B10.2
WBGene00001704	grd-15	0.405713	0.504141	14 - 23	7 - 14	1.25333	0.66	Y87G2A.15
WBGene00001705	grd-16	1.02387	0.0848343	13 - 20	1 - 10	0.6	0.143333	Y69A2AL.1
WBGene00001706	grd-17	-0.945766	0.117749	2 - 3	4 - 15	0.17	0.586667	Y102A5C.34
WBGene00001707	grh-1	1.79257	4.77697e-11	210 - 332	52 - 82	8.29333	2.00667	Y48G8AR.1	GRHL2,GRHL1,GRHL3	ENSG00000083307,ENSG00000134317,ENSG00000158055
WBGene00001708	grk-1	0.201471	0.302558	689 - 824	499 - 647	10.2933	7.16333	F19C6.1	GRK5,GRK6,GRK4	ENSG00000198873,ENSG00000198055,ENSG00000125388
WBGene00001709	grk-2	0.0807356	0.740097	322 - 367	234 - 351	6.4	4.96	W02B3.2	GRK3,GRK2	ENSG00000100077,ENSG00000173020
WBGene00001710	grl-1	1.04693	0.0189649	33 - 66	19 - 20	1.87667	0.596667	C24G6.7
WBGene00001711	grl-2	0.536708	0.240001	34 - 43	20 - 25	1.03333	0.533333	T16G1.8
WBGene00001712	grl-3	0.51773	1	1 - 7	0 - 1	0.173333	0.03	K03B8.7
WBGene00001713	grl-4	1.23879	1.00858e-09	461 - 578	146 - 215	26.9233	8.88333	F42C5.7
WBGene00001714	grl-5	2.28131	1.90153e-05	271 - 523	11 - 63	19.44	1.30333	Y47D7A.5
WBGene00001715	grl-6	1.07285	0.0718485	10 - 22	0 - 7	0.866667	0.136667	K10C2.5
WBGene00001716	grl-7	2.67709	5.58074e-11	136 - 450	13 - 49	10.2433	0.92	T02E9.2
WBGene00001717	grl-8	0.0183761	0.977543	15 - 22	13 - 20	1.02	0.886667	ZC487.5
WBGene00001718	grl-9	0.0620779	0.935932	5 - 10	3 - 8	0.293333	0.206667	ZC487.4
WBGene00001719	grl-10	2.27679	2.14142e-11	182 - 247	14 - 42	8.97333	1.25667	C26F1.5
WBGene00001720	grl-11	0.018123	0.981241	3 - 14	4 - 12	0.716667	0.513333	ZK512.9
WBGene00001721	grl-12	1.61887	0.00368032	17 - 27	1 - 5	1.30667	0.166667	F28A12.2
WBGene00001722	grl-13	-0.0938969	0.899653	2 - 6	2 - 6	0.17	0.113333	F32D1.4
WBGene00001723	grl-14	1.09898	0.0269334	28 - 45	6 - 14	0.976667	0.286667	T03D8.4
WBGene00001724	grl-15	2.83587	1.71324e-18	382 - 580	25 - 87	31.1567	2.8	Y75B8A.20
WBGene00001725	grl-16	1.90963	1.09197e-11	387 - 589	72 - 168	12.32	2.45	Y65B4BR.6
WBGene00001726	grl-17	-0.287586	0.602399	17 - 28	21 - 30	0.703333	0.693333	C56A3.1	DMKN	ENSG00000161249
WBGene00001727	grl-18	1.22794	0.0220547	18 - 31	6 - 6	0.67	0.156667	T05C3.4
WBGene00001729	grl-20	-0.0836964	0.911186	2 - 7	3 - 7	0.283333	0.23	C23H5.9
WBGene00001730	grl-21	2.23029	3.58806e-08	233 - 310	16 - 80	17.44	2.31667	ZC168.5
WBGene00001731	grl-22	-0.382693	0.478639	16 - 24	18 - 31	1.53667	1.65667	W03A5.3
WBGene00001734	grl-25	0.158188	0.826264	6 - 12	4 - 8	0.12	0.07	ZK643.8	ZNF503	ENSG00000165655
WBGene00001735	grl-26	-0.371035	0.573349	7 - 9	6 - 19	0.463333	0.686667	K02D7.6
WBGene00001740	gro-1	-0.109744	0.528975	593 - 714	544 - 685	18.93	16.6267	ZC395.6	TRIT1	ENSG00000043514
WBGene00001743	grp-1	-0.49736	9.54525e-05	2350 - 3061	2968 - 3597	65.0767	74.9833	K06H7.4	CYTH3,CYTH2,CYTH1,CYTH4,FBXO8	ENSG00000008256,ENSG00000105443,ENSG00000108669,ENSG00000100055,ENSG00000164117,ENSG00000268465
WBGene00001744	gars-1	0.0796053	0.563121	5459 - 6039	4494 - 5105	100.457	76.9067	T10F2.1	GARS	ENSG00000106105
WBGene00001745	gsa-1	0.83466	0.00023667	313 - 341	111 - 203	6.81667	3.15667	R06A10.2	GNAS,GNAL	ENSG00000087460,ENSG00000141404
WBGene00001746	gsk-3	0.186745	0.156477	2182 - 2291	1552 - 1998	42.2933	30.0967	Y18D10A.5	GSK3B,GSK3A	ENSG00000082701,ENSG00000105723,ENSG00000268643
WBGene00001747	gsp-1	-0.238058	0.0471337	5124 - 5195	4959 - 5719	120.103	114.547	F29F11.6	PPP1CB,PPP1CA,PPP1CC	ENSG00000213639,ENSG00000172531,ENSG00000186298
WBGene00001748	gsp-2	-0.382659	0.00196455	11595 - 13472	13445 - 14569	311.293	328.153	F56C9.1	PPP1CA,PPP1CC,PPP1CB	ENSG00000172531,ENSG00000186298,ENSG00000213639
WBGene00001749	gst-1	-0.490179	0.00023667	6437 - 8118	8145 - 9001	414.393	469.227	R107.7	GSTP1,GSTM1,GSTM5,GSTM3,GSTM4,GSTM2	ENSG00000084207,ENSG00000134184,ENSG00000134201,ENSG00000134202,ENSG00000168765,ENSG00000213366
WBGene00001750	gst-2	0.836621	0.152931	5 - 12	0 - 4	0.506667	0.0866667	K08F4.6	GSTA4,GSTA3,GSTA5,GSTA1,GSTA2,HPGDS	ENSG00000170899,ENSG00000174156,ENSG00000182793,ENSG00000243955,ENSG00000244067,ENSG00000163106
WBGene00001751	gst-3	0.413403	0.375819	38 - 45	20 - 38	2.38333	1.32	K08F4.11	GSTA4,GSTA3,GSTA5,GSTA1,GSTA2,HPGDS	ENSG00000170899,ENSG00000174156,ENSG00000182793,ENSG00000243955,ENSG00000244067,ENSG00000163106
WBGene00001752	gst-4	-0.580448	0.000324496	377 - 406	454 - 608	21.7567	26.4533	K08F4.7	HPGDS,GSTA4,GSTA3,GSTA5,GSTA1,GSTA2	ENSG00000163106,ENSG00000170899,ENSG00000174156,ENSG00000182793,ENSG00000243955,ENSG00000244067
WBGene00001753	gst-5	0.255805	0.196625	787 - 987	617 - 628	52.6	35.4667	R03D7.6	HPGDS,GSTA4,GSTA3,GSTA5,GSTA1,GSTA2	ENSG00000163106,ENSG00000170899,ENSG00000174156,ENSG00000182793,ENSG00000243955,ENSG00000244067
WBGene00001754	gst-6	0.567171	0.00422658	395 - 420	193 - 308	23.13	12.5567	F11G11.3	GSTA4,GSTA3,GSTA5,GSTA1,GSTA2,HPGDS	ENSG00000170899,ENSG00000174156,ENSG00000182793,ENSG00000243955,ENSG00000244067,ENSG00000163106
WBGene00001755	gst-7	-0.419594	0.000882473	3785 - 4456	4231 - 5348	250.207	272.11	F11G11.2	GSTA4,GSTA3,GSTA5,GSTA1,GSTA2,HPGDS	ENSG00000170899,ENSG00000174156,ENSG00000182793,ENSG00000243955,ENSG00000244067,ENSG00000163106
WBGene00001757	gst-9	0.249578	0.643362	28 - 35	15 - 29	1.94	1.17333	R05F9.5	GSTA4,GSTA3,GSTA5,GSTA1,GSTA2,HPGDS	ENSG00000170899,ENSG00000174156,ENSG00000182793,ENSG00000243955,ENSG00000244067,ENSG00000163106
WBGene00001758	gst-10	-0.101843	0.695457	510 - 770	522 - 751	51.1267	42.5467	Y45G12C.2	GSTP1	ENSG00000084207
WBGene00001759	gst-11	0.570138	0.283493	23 - 31	11 - 20	1.58333	0.883333	R11G1.3	HPGDS	ENSG00000163106
WBGene00001760	gst-12	0.00979747	0.982287	72 - 82	59 - 79	4.65667	3.66	F37B1.2	GSTA4,GSTA3,GSTA5,GSTA1,GSTA2,HPGDS	ENSG00000170899,ENSG00000174156,ENSG00000182793,ENSG00000243955,ENSG00000244067,ENSG00000163106
WBGene00001761	gst-13	-0.197547	0.335704	1008 - 1252	900 - 1568	67.0833	63.8833	T26C5.1	GSTA4,GSTA3,GSTA5,GSTA1,GSTA2,HPGDS	ENSG00000170899,ENSG00000174156,ENSG00000182793,ENSG00000243955,ENSG00000244067,ENSG00000163106
WBGene00001762	gst-14	1.38663	0.00290984	35 - 42	7 - 13	2.52333	0.616667	F37B1.3	GSTA4,GSTA3,GSTA5,GSTA1,GSTA2,HPGDS	ENSG00000170899,ENSG00000174156,ENSG00000182793,ENSG00000243955,ENSG00000244067,ENSG00000163106
WBGene00001763	gst-15	0.36966	0.34714	63 - 68	36 - 49	4	2.4	F37B1.4	GSTA4,GSTA3,GSTA5,GSTA1,GSTA2,HPGDS	ENSG00000170899,ENSG00000174156,ENSG00000182793,ENSG00000243955,ENSG00000244067,ENSG00000163106
WBGene00001764	gst-16	-0.150471	0.66467	82 - 129	88 - 132	6.74333	6.15	F37B1.5	GSTM3,GSTM4,GSTM2,GSTA4,GSTA3,GSTA5,GSTA1,GSTA2,HPGDS	ENSG00000134202,ENSG00000168765,ENSG00000213366,ENSG00000170899,ENSG00000174156,ENSG00000182793,ENSG00000243955,ENSG00000244067,ENSG00000163106
WBGene00001767	gst-19	1.31058	0.0179511	17 - 21	3 - 5	1.30667	0.26	F37B1.8	HPGDS,GSTA4,GSTA3,GSTA5,GSTA1,GSTA2	ENSG00000163106,ENSG00000170899,ENSG00000174156,ENSG00000182793,ENSG00000243955,ENSG00000244067
WBGene00001768	gst-20	0.97189	1.07494e-08	798 - 911	310 - 507	51.41	20.9833	Y48E1B.10	GSTA4,GSTA3,GSTA5,GSTA1,GSTA2,HPGDS	ENSG00000170899,ENSG00000174156,ENSG00000182793,ENSG00000243955,ENSG00000244067,ENSG00000163106
WBGene00001769	gst-21	0.486776	0.346465	32 - 34	10 - 28	2.24667	1.13	ZK697.6	GSTA4,GSTA3,GSTA5,GSTA1,GSTA2,HPGDS,GSTT2,GSTT2B	ENSG00000170899,ENSG00000174156,ENSG00000182793,ENSG00000243955,ENSG00000244067,ENSG00000163106,ENSG00000099984,ENSG00000133433
WBGene00001770	gst-22	0.0451614	0.853811	414 - 431	336 - 371	25.9933	20.39	F21H7.1	GSTA4,GSTA3,GSTA5,GSTA1,GSTA2,HPGDS	ENSG00000170899,ENSG00000174156,ENSG00000182793,ENSG00000243955,ENSG00000244067,ENSG00000163106
WBGene00001771	gst-23	0.414646	0.493204	18 - 23	7 - 18	1.33667	0.733333	T28A11.11	GSTP1,GSTM3,GSTM4,GSTM2,GSTM1,GSTM5	ENSG00000084207,ENSG00000134202,ENSG00000168765,ENSG00000213366,ENSG00000134184,ENSG00000134201
WBGene00001772	gst-24	-0.192258	0.256698	3136 - 4246	2934 - 4264	220.36	204.673	F37B1.1	GSTA4,GSTA3,GSTA5,GSTA1,GSTA2,HPGDS	ENSG00000170899,ENSG00000174156,ENSG00000182793,ENSG00000243955,ENSG00000244067,ENSG00000163106
WBGene00001773	gst-25	0.500871	0.445307	9 - 13	1 - 11	0.746667	0.286667	F37F2.3	GSTP1,GSTM1,GSTM5,GSTM3,GSTM4,GSTM2	ENSG00000084207,ENSG00000134184,ENSG00000134201,ENSG00000134202,ENSG00000168765,ENSG00000213366
WBGene00001774	gst-26	0.915671	0.000134931	459 - 608	169 - 339	33.97	14.15	Y53F4B.29	GSTA4,GSTA3,GSTA5,GSTA1,GSTA2,HPGDS	ENSG00000170899,ENSG00000174156,ENSG00000182793,ENSG00000243955,ENSG00000244067,ENSG00000163106
WBGene00001775	gst-27	0.904632	7.83009e-06	857 - 1296	424 - 585	64.73	27.4967	Y53F4B.30	GSTA4,GSTA3,GSTA5,GSTA1,GSTA2,HPGDS	ENSG00000170899,ENSG00000174156,ENSG00000182793,ENSG00000243955,ENSG00000244067,ENSG00000163106
WBGene00001776	gst-28	1.30855	4.35467e-08	310 - 410	90 - 160	21.0467	6.76333	Y53F4B.31	HPGDS,GSTA4,GSTA3,GSTA5,GSTA1,GSTA2	ENSG00000163106,ENSG00000170899,ENSG00000174156,ENSG00000182793,ENSG00000243955,ENSG00000244067
WBGene00001777	gst-29	-1.85717	2.64638e-08	29 - 45	91 - 194	2.27	7.97667	Y53F4B.32	GSTA4,GSTA3,GSTA5,GSTA1,GSTA2,HPGDS,GSTT2,GSTT2B	ENSG00000170899,ENSG00000174156,ENSG00000182793,ENSG00000243955,ENSG00000244067,ENSG00000163106,ENSG00000099984,ENSG00000133433
WBGene00001778	gst-30	-1.01257	0.00013306	73 - 114	164 - 182	5.85667	9.95333	ZK546.11	GSTA4,GSTA3,GSTA5,GSTA1,GSTA2,HPGDS	ENSG00000170899,ENSG00000174156,ENSG00000182793,ENSG00000243955,ENSG00000244067,ENSG00000163106
WBGene00001779	gst-31	0.897225	0.119595	14 - 19	4 - 8	1.13	0.333333	Y53F4B.35	GSTA4,GSTA3,GSTA5,GSTA1,GSTA2,HPGDS	ENSG00000170899,ENSG00000174156,ENSG00000182793,ENSG00000243955,ENSG00000244067,ENSG00000163106
WBGene00001780	gst-32	-0.369723	0.578704	5 - 9	6 - 16	0.463333	0.66	Y53F4B.37	GSTA4,GSTA3,GSTA1,GSTA2,GSTA5,HPGDS	ENSG00000170899,ENSG00000174156,ENSG00000243955,ENSG00000244067,ENSG00000182793,ENSG00000163106
WBGene00001781	gst-33	0.778688	0.134399	21 - 32	8 - 15	1.63667	0.62	C02A12.1	GSTA4,GSTA3,GSTA5,GSTA1,GSTA2,HPGDS	ENSG00000170899,ENSG00000174156,ENSG00000182793,ENSG00000243955,ENSG00000244067,ENSG00000163106
WBGene00001783	gst-35	0.759344	0.107956	32 - 39	13 - 22	2.07333	0.886667	Y1H11.2	GSTA4,GSTA3,GSTA5,GSTA1,GSTA2,HPGDS	ENSG00000170899,ENSG00000174156,ENSG00000182793,ENSG00000243955,ENSG00000244067,ENSG00000163106
WBGene00001784	gst-36	0.774252	3.00554e-05	888 - 1141	393 - 619	56.7433	26.7267	R07B1.4	GSTA4,GSTA3,GSTA5,GSTA1,GSTA2,HPGDS	ENSG00000170899,ENSG00000174156,ENSG00000182793,ENSG00000243955,ENSG00000244067,ENSG00000163106
WBGene00001786	gst-38	-0.70375	0.000307746	237 - 324	331 - 472	13.6	18.3333	F35E8.8	HPGDS,GSTA4,GSTA3,GSTA5,GSTA1,GSTA2	ENSG00000163106,ENSG00000170899,ENSG00000174156,ENSG00000182793,ENSG00000243955,ENSG00000244067
WBGene00001787	gst-39	0.363961	0.207399	178 - 250	112 - 187	13.0667	8.18667	Y53F4B.33	GSTA4,GSTA3,GSTA5,GSTA1,GSTA2,HPGDS	ENSG00000170899,ENSG00000174156,ENSG00000182793,ENSG00000243955,ENSG00000244067,ENSG00000163106
WBGene00001788	gst-40	0.66945	0.172328	35 - 44	10 - 24	2.27667	0.983333	F56B3.10	GSTA4,GSTA3,GSTA5,GSTA1,GSTA2	ENSG00000170899,ENSG00000174156,ENSG00000182793,ENSG00000243955,ENSG00000244067
WBGene00001789	gst-41	0.807286	0.129516	26 - 34	7 - 24	2.01	0.76	R13D7.7	GSTP1,GSTM1,GSTM5,GSTM3,GSTM4,GSTM2	ENSG00000084207,ENSG00000134184,ENSG00000134201,ENSG00000134202,ENSG00000168765,ENSG00000213366
WBGene00001790	gst-42	0.11944	0.513351	764 - 836	533 - 803	34.9667	26.0067	D1053.1	GSTZ1	ENSG00000100577
WBGene00001791	gst-43	-0.416254	0.0522931	207 - 252	249 - 271	13.7333	14.76	Y71F9AL.5	GSTZ1	ENSG00000100577
WBGene00001792	gst-44	-0.736039	0.0299831	45 - 49	68 - 75	2.22	3.14	F13A7.10	GSTO1,GSTO2	ENSG00000148834,ENSG00000065621
WBGene00001793	gsy-1	-0.00753675	0.963979	4378 - 4488	3554 - 4137	73.2067	59.15	Y46G5A.31	GYS1,GYS2	ENSG00000104812,ENSG00000111713
WBGene00001794	gta-1	0.306233	0.0308573	5791 - 6404	3742 - 5593	153.897	100.77	K04D7.3	ABAT	ENSG00000183044
WBGene00001795	gtl-1	-0.680396	0.000200695	644 - 728	697 - 1175	5.01667	6.71333	C05C12.3	TRPM3,TRPM7,TRPM6,TRPM1,TRPM5,TRPM4,TRPM2,TRPM8	ENSG00000083067,ENSG00000092439,ENSG00000119121,ENSG00000134160,ENSG00000070985,ENSG00000130529,ENSG00000142185,ENSG00000144481
WBGene00001796	gtl-2	1.147	0.0045333	106 - 147	20 - 84	1.15	0.376667	F54D1.5	TRPM3,TRPM7,TRPM6,TRPM1,TRPM5,TRPM4,TRPM2,TRPM8	ENSG00000083067,ENSG00000092439,ENSG00000119121,ENSG00000134160,ENSG00000070985,ENSG00000130529,ENSG00000142185,ENSG00000144481
WBGene00001803	lite-1	0.495533	0.137442	75 - 98	46 - 63	2.35	1.32333	C14F11.3
WBGene00001805	gur-4	0.815751	0.135668	15 - 30	9 - 10	0.573333	0.216667	K09E4.5
WBGene00001806	gur-5	-0.157097	0.829188	4 - 6	3 - 10	0.14	0.15	ZK622.2
WBGene00001808	gut-2	-0.647841	3.83727e-06	942 - 1183	1372 - 1542	127.073	163.307	T10G3.6	LSM2,LSM2,LSM2,LSM2,LSM2,LSM2	ENSG00000204392,ENSG00000172850,ENSG00000224979,ENSG00000225998,ENSG00000231502,ENSG00000236826
WBGene00001811	haf-1	0.143517	0.59874	153 - 182	117 - 146	3.12	2.24667	C30H6.6	ABCB10,ABCB8	ENSG00000135776,ENSG00000197150
WBGene00001812	haf-2	-0.726536	2.16899e-05	3198 - 3778	4377 - 5348	54.1167	72.36	F43E2.4	ABCB9,TAP1,TAP2	ENSG00000150967,ENSG00000168394,ENSG00000204267,ENSG00000250264
WBGene00001813	haf-3	0.036028	0.836644	2373 - 2468	2002 - 2109	43.4333	33.7333	F57A10.3	ABCB10,ABCB8	ENSG00000135776,ENSG00000197150
WBGene00001814	haf-4	0.534192	0.00809405	702 - 982	437 - 613	14.26	7.99333	W04C9.1	ABCB9,TAP1,TAP2	ENSG00000150967,ENSG00000168394,ENSG00000204267,ENSG00000250264
WBGene00001815	hmt-1	-0.170414	0.339685	2170 - 2261	2040 - 2297	34.37	31.1567	W09D6.6	ABCB6,ABCB7	ENSG00000115657,ENSG00000131269
WBGene00001816	haf-6	0.156341	0.374088	727 - 797	575 - 626	16.5167	12.56	Y48G8AL.11	ABCB8,ABCB10	ENSG00000197150,ENSG00000135776
WBGene00001817	haf-7	0.17866	0.445309	616 - 834	429 - 784	11.7433	8.41	Y50E8A.16	ABCB9,TAP1,TAP2,ABCB8,ABCB10	ENSG00000150967,ENSG00000168394,ENSG00000204267,ENSG00000250264,ENSG00000197150,ENSG00000135776
WBGene00001819	haf-9	0.0102038	0.970337	849 - 1235	815 - 1136	16.41	13.2633	ZK484.2	ABCB9,TAP1,TAP2	ENSG00000150967,ENSG00000168394,ENSG00000204267,ENSG00000250264
WBGene00001820	ham-1	0.238455	0.454621	600 - 717	321 - 846	15.1933	10.62	F53B2.6	STOX1,STOX2	ENSG00000165730,ENSG00000173320
WBGene00001821	ham-2	0.340908	0.269886	147 - 167	72 - 145	4.59667	2.94333	C07A12.1
WBGene00001823	hap-1	-0.419679	0.0132029	600 - 742	729 - 798	42.8933	46.45	ZC395.7	ITPA	ENSG00000125877
WBGene00001824	hbl-1	1.47438	8.4328e-08	446 - 676	102 - 237	5.98667	1.64	F13D11.2	REST,ZNF142,ZNF462,ZNF827,ZNF513,ZNF507,ZSCAN10	ENSG00000084093,ENSG00000115568,ENSG00000148143,ENSG00000151612,ENSG00000163795,ENSG00000168813,ENSG00000130182
WBGene00001827	hcf-1	-0.394548	0.00106493	7749 - 8091	8382 - 9417	113.03	120.337	C46A5.9	HCFC2,HCFC1	ENSG00000111727,ENSG00000172534
WBGene00001828	hch-1	1.1798	1.30303e-06	700 - 786	199 - 444	15.5267	5.46667	F40E10.1	MEP1A,MEP1B	ENSG00000112818,ENSG00000141434
WBGene00001829	hcp-1	-0.247926	0.0939425	10448 - 11627	9874 - 12832	95.73	92.41	ZK1055.1	GCC2,CAGE1	ENSG00000135968,ENSG00000164304
WBGene00001830	hcp-2	-0.19896	0.0859568	6348 - 6599	5802 - 7298	62.0933	58.0167	T06E4.1	GCC2,CAGE1	ENSG00000135968,ENSG00000164304
WBGene00001831	hcp-3	-0.6105	1.00416e-05	2946 - 3463	3949 - 4441	133.313	163.86	F58A4.3	CENPA	ENSG00000115163
WBGene00001832	hcp-4	-0.181799	0.229622	4873 - 5425	4864 - 5271	75.2333	69.0867	T03F1.9
WBGene00001833	hcp-6	0.434356	0.00361302	4119 - 4522	2219 - 3489	32.0067	19.3033	Y110A7A.1	NCAPD3	ENSG00000151503
WBGene00001834	hda-1	-0.530497	2.19529e-06	7583 - 7913	9441 - 10273	172.417	202.053	C53A5.3	HDAC2,HDAC1,HDAC3	ENSG00000196591,ENSG00000116478,ENSG00000171720
WBGene00001835	hda-2	-0.0955551	0.490274	1535 - 1675	1344 - 1699	39.03	33.9733	C08B11.2	HDAC8	ENSG00000147099
WBGene00001836	hda-3	-0.363406	0.00913221	2368 - 2611	2742 - 2817	58.2533	60.3567	R06C1.1	HDAC1,HDAC2,HDAC3	ENSG00000116478,ENSG00000196591,ENSG00000171720
WBGene00001837	hda-4	0.366123	0.0170042	814 - 900	494 - 666	10.98	6.86667	C10E2.3	HDAC9,HDAC7,HDAC4,HDAC5,HDAC10,HDAC6	ENSG00000048052,ENSG00000061273,ENSG00000068024,ENSG00000108840,ENSG00000100429,ENSG00000094631
WBGene00001838	hda-10	-0.515225	0.0118726	1173 - 1431	1383 - 1725	31.43	36.4467	Y51H1A.5	HDAC9,HDAC7,HDAC4,HDAC5,HDAC10	ENSG00000048052,ENSG00000061273,ENSG00000068024,ENSG00000108840,ENSG00000100429
WBGene00001839	hdl-1	0.395497	0.515108	11 - 23	9 - 13	0.243333	0.146667	ZK829.2
WBGene00001840	hel-1	-0.296329	0.0166924	17778 - 20830	19735 - 21149	520.86	517.747	C26D10.2	DDX39A,DDX39B,DDX39B,DDX39B,DDX39B,DDX39B,DDX39B,DDX39B,DDX39B	ENSG00000123136,ENSG00000198563,ENSG00000235439,ENSG00000215425,ENSG00000225073,ENSG00000225859,ENSG00000229496,ENSG00000230624,ENSG00000237889
WBGene00001841	hen-1	-1.83703	1.05898e-15	57 - 69	200 - 225	6.73667	19.6267	C36B7.7
WBGene00001842	her-1	-0.694275	0.0823009	28 - 44	41 - 80	4.94333	7.18333	ZK287.8
WBGene00001843	hgo-1	0.711295	0.000104757	2453 - 2767	1082 - 1993	69.3667	34.4833	W06D4.1	HGD	ENSG00000113924
WBGene00001844	hid-1	0.411649	0.0546414	1199 - 1256	577 - 1180	18.7933	11.6333	K02E10.2	HID1	ENSG00000167861
WBGene00001851	hif-1	0.419357	0.000710352	3893 - 4081	2189 - 3122	59.3833	35.8267	F38A6.3	HIF1A,EPAS1,SIM1,HIF3A,NPAS1,NPAS3,SIM2	ENSG00000100644,ENSG00000116016,ENSG00000112246,ENSG00000124440,ENSG00000130751,ENSG00000151322,ENSG00000159263
WBGene00001852	hil-1	-0.711934	0.00542344	134 - 205	214 - 246	7.16	9.56333	C30G7.1	H1F0	ENSG00000189060
WBGene00001853	hil-2	0.658262	0.00330925	1672 - 2090	697 - 1467	107.797	55.92	Y73B6BL.9	HIST1H1E,HIST1H1B,H1F0,HIST1H1D,HIST1H1A,HIST1H1T,HIST1H1C	ENSG00000168298,ENSG00000184357,ENSG00000189060,ENSG00000124575,ENSG00000124610,ENSG00000187475,ENSG00000187837
WBGene00001854	hil-3	0.206002	0.440158	1009 - 1181	606 - 1265	53.6667	38.22	F22F1.1	HIST1H1E,HIST1H1B,H1F0,HIST1H1D,HIST1H1A,HIST1H1T,HIST1H1C	ENSG00000168298,ENSG00000184357,ENSG00000189060,ENSG00000124575,ENSG00000124610,ENSG00000187475,ENSG00000187837
WBGene00001855	hil-4	-0.593265	0.00213244	6749 - 7904	8170 - 10839	332.307	403.58	C18G1.5	HIST1H1A,HIST1H1E,HIST1H1B,HIST1H1D,HIST1H1T,HIST1H1C,H1F0	ENSG00000124610,ENSG00000168298,ENSG00000184357,ENSG00000124575,ENSG00000187475,ENSG00000187837,ENSG00000189060
WBGene00001856	hil-5	0.413844	0.00366565	5847 - 6873	3793 - 4265	315.573	189.093	B0414.3	HIST1H1E,HIST1H1B,HIST1H1D,HIST1H1A,HIST1H1T,HIST1H1C,H1F0	ENSG00000168298,ENSG00000184357,ENSG00000124575,ENSG00000124610,ENSG00000187475,ENSG00000187837,ENSG00000189060
WBGene00001857	hil-6	0.345826	0.559876	22 - 24	8 - 26	1.30333	0.75	F59A7.4	HIST1H1E,HIST1H1B,H1F0,HIST1H1D,HIST1H1A,HIST1H1T,HIST1H1C	ENSG00000168298,ENSG00000184357,ENSG00000189060,ENSG00000124575,ENSG00000124610,ENSG00000187475,ENSG00000187837
WBGene00001858	hil-7	3.53403	3.03012e-56	459 - 491	26 - 36	43.0133	2.45333	C01B10.5
WBGene00001859	hil-8	-0.285007	0.476292	46 - 71	58 - 67	1.19	1.30667	T05E8.2
WBGene00001860	him-1	-0.0559646	0.701311	7974 - 8236	6290 - 8374	104.64	92.7167	F28B3.7	SMC1A,SMC1B	ENSG00000072501,ENSG00000077935
WBGene00001862	him-3	-0.676903	0.000414998	2396 - 3064	3158 - 4119	100.733	129.597	ZK381.1	HORMAD2,HORMAD1	ENSG00000176635,ENSG00000143452
WBGene00001863	him-4	2.05349	1.89602e-16	981 - 1164	111 - 309	6.48667	1.36333	F15G9.4	HMCN1,HMCN2,OBSL1,OBSCN,HSPG2,TTN,SPEG	ENSG00000143341,ENSG00000148357,ENSG00000124006,ENSG00000154358,ENSG00000142798,ENSG00000155657,ENSG00000072195
WBGene00001864	him-5	-0.645732	0.000236924	406 - 507	597 - 625	23.5333	27.5833	D1086.4
WBGene00001865	him-6	0.22481	0.117639	1729 - 1950	1227 - 1576	23.2467	16.03	T04A11.6	BLM,RECQL5,WRN,RECQL	ENSG00000197299,ENSG00000108469,ENSG00000165392,ENSG00000004700
WBGene00001867	him-8	-0.241397	0.0743223	1345 - 1640	1441 - 1659	107.53	108.047	T07G12.12
WBGene00001869	him-10	-0.321253	0.00359883	3286 - 3759	3472 - 4285	81.35	82.2667	R12B2.4	NUF2	ENSG00000143228
WBGene00001872	him-14	0.2045	0.199598	783 - 988	625 - 719	13.6133	9.45667	ZK1127.11	MSH4	ENSG00000057468
WBGene00001874	him-17	-0.356206	0.0203557	4743 - 4811	4998 - 5808	61.5267	63.59	T09E8.2
WBGene00001875	his-1	0.047544	0.951747	4 - 11	2 - 11	0.803333	0.456667	T10C6.14	HIST1H4H,HIST1H4C,HIST1H4J,HIST4H4,HIST2H4B,HIST2H4A,HIST1H4I,HIST1H4B,HIST1H4K,HIST1H4E,HIST1H4D,HIST1H4A,HIST1H4F,HIST1H4L,HIST1H4G	ENSG00000158406,ENSG00000197061,ENSG00000197238,ENSG00000197837,ENSG00000270276,ENSG00000270882,ENSG00000276180,ENSG00000278705,ENSG00000273542,ENSG00000276966,ENSG00000277157,ENSG00000278637,ENSG00000274618,ENSG00000275126,ENSG00000275663
WBGene00001876	his-2	0.11451	0.876369	6 - 11	6 - 7	0.816667	0.596667	T10C6.13	HIST1H3J,HIST1H3D,HIST1H3G,HIST1H3B,HIST1H3E,HIST1H3I,HIST1H3A,HIST1H3F,HIST1H3C,HIST1H3H,HIST2H3D,HIST2H3C,HIST2H3A,HIST2H3PS2,HIST3H3,H3F3B,H3F3A	ENSG00000197153,ENSG00000197409,ENSG00000273983,ENSG00000274267,ENSG00000274750,ENSG00000275379,ENSG00000275714,ENSG00000277775,ENSG00000278272,ENSG00000278828,ENSG00000183598,ENSG00000203811,ENSG00000203852,ENSG00000203818,ENSG00000168148,ENSG00000132475,ENSG00000163041,ENSG00000178458
WBGene00001877	his-3	0.625079	0.237353	23 - 37	11 - 16	4.01667	1.83	T10C6.12	HIST1H2AI,HIST2H2AC,HIST1H2AK,HIST1H2AL,HIST1H2AA,HIST1H2AC,HIST3H2A,HIST2H2AB,H2AFX,HIST1H2AG,HIST1H2AD,HIST2H2AA3,H2AFJ,HIST2H2AA4,HIST1H2AH,HIST1H2AJ,HIST1H2AE,HIST1H2AB,HIST1H2AM	ENSG00000196747,ENSG00000184260,ENSG00000275221,ENSG00000276903,ENSG00000164508,ENSG00000180573,ENSG00000181218,ENSG00000184270,ENSG00000188486,ENSG00000196787,ENSG00000196866,ENSG00000203812,ENSG00000246705,ENSG00000272196,ENSG00000274997,ENSG00000276368,ENSG00000277075,ENSG00000278463,ENSG00000278677
WBGene00001878	his-4	-0.0518248	0.943251	10 - 14	10 - 13	1.58	1.36333	T10C6.11	HIST1H2BJ,HIST1H2BA,HIST1H2BD,HIST1H2BC,HIST2H2BE,HIST1H2BL,HIST3H2BB,HIST1H2BK,HIST1H2BN,HIST1H2BM,HIST1H2BG,HIST1H2BE,HIST1H2BB,HIST1H2BF,HIST1H2BI,HIST2H2BF,H2BFS,HIST1H2BO,HIST1H2BH,H2BFM,H2BFWT	ENSG00000124635,ENSG00000146047,ENSG00000158373,ENSG00000180596,ENSG00000184678,ENSG00000185130,ENSG00000196890,ENSG00000197903,ENSG00000233822,ENSG00000273703,ENSG00000273802,ENSG00000274290,ENSG00000276410,ENSG00000277224,ENSG00000278588,ENSG00000203814,ENSG00000234289,ENSG00000274641,ENSG00000275713,ENSG00000101812,ENSG00000123569,ENSG00000274559
WBGene00001879	his-5	-0.451482	0.496569	3 - 7	4 - 12	1.04	1.92667	F45F2.3	HIST4H4,HIST1H4H,HIST1H4C,HIST1H4J,HIST2H4B,HIST2H4A,HIST1H4I,HIST1H4B,HIST1H4K,HIST1H4E,HIST1H4D,HIST1H4A,HIST1H4F,HIST1H4L,HIST1H4G	ENSG00000197837,ENSG00000158406,ENSG00000197061,ENSG00000197238,ENSG00000270276,ENSG00000270882,ENSG00000276180,ENSG00000278705,ENSG00000273542,ENSG00000276966,ENSG00000277157,ENSG00000278637,ENSG00000274618,ENSG00000275126,ENSG00000275663
WBGene00001880	his-6	0.0214622	0.976209	10 - 15	10 - 13	2.05667	1.69667	F45F2.13	HIST1H3J,HIST1H3D,HIST1H3G,HIST1H3B,HIST1H3E,HIST1H3I,HIST1H3A,HIST1H3F,HIST1H3C,HIST1H3H,HIST2H3D,HIST2H3C,HIST2H3A,HIST2H3PS2,HIST3H3,H3F3B,H3F3A	ENSG00000197153,ENSG00000197409,ENSG00000273983,ENSG00000274267,ENSG00000274750,ENSG00000275379,ENSG00000275714,ENSG00000277775,ENSG00000278272,ENSG00000278828,ENSG00000183598,ENSG00000203811,ENSG00000203852,ENSG00000203818,ENSG00000168148,ENSG00000132475,ENSG00000163041,ENSG00000178458
WBGene00001881	his-7	0.472803	0.473937	3 - 16	4 - 6	1.95667	0.816667	F45F2.4	HIST1H2AI,HIST2H2AC,HIST1H2AK,HIST1H2AL,HIST1H2AA,HIST1H2AC,HIST3H2A,HIST2H2AB,H2AFX,HIST1H2AG,HIST1H2AD,HIST2H2AA3,H2AFJ,HIST2H2AA4,HIST1H2AH,HIST1H2AJ,HIST1H2AE,HIST1H2AB,HIST1H2AM	ENSG00000196747,ENSG00000184260,ENSG00000275221,ENSG00000276903,ENSG00000164508,ENSG00000180573,ENSG00000181218,ENSG00000184270,ENSG00000188486,ENSG00000196787,ENSG00000196866,ENSG00000203812,ENSG00000246705,ENSG00000272196,ENSG00000274997,ENSG00000276368,ENSG00000277075,ENSG00000278463,ENSG00000278677
WBGene00001882	his-8	-0.35447	0.598791	4 - 7	7 - 9	0.863333	1.19333	F45F2.12	HIST1H2BJ,HIST1H2BA,HIST1H2BC,HIST2H2BE,HIST1H2BL,HIST3H2BB,HIST1H2BK,HIST1H2BN,HIST2H2BF,HIST1H2BD,HIST1H2BG,HIST1H2BE,HIST1H2BB,HIST1H2BF,HIST1H2BI,HIST1H2BO,HIST1H2BH,H2BFS,HIST1H2BM,H2BFM,H2BFWT	ENSG00000124635,ENSG00000146047,ENSG00000180596,ENSG00000184678,ENSG00000185130,ENSG00000196890,ENSG00000197903,ENSG00000233822,ENSG00000203814,ENSG00000158373,ENSG00000273802,ENSG00000274290,ENSG00000276410,ENSG00000277224,ENSG00000278588,ENSG00000274641,ENSG00000275713,ENSG00000234289,ENSG00000273703,ENSG00000101812,ENSG00000123569
WBGene00001885	his-11	-0.273858	0.655128	10 - 31	19 - 21	18.37	20.58	ZK131.5	HIST1H2BJ,HIST1H2BA,HIST1H2BD,HIST1H2BC,HIST2H2BE,HIST1H2BL,HIST3H2BB,HIST1H2BK,HIST1H2BN,HIST1H2BM,HIST1H2BG,HIST1H2BE,HIST1H2BB,HIST1H2BF,HIST1H2BI,HIST2H2BF,H2BFS,HIST1H2BO,HIST1H2BH,H2BFM,H2BFWT	ENSG00000124635,ENSG00000146047,ENSG00000158373,ENSG00000180596,ENSG00000184678,ENSG00000185130,ENSG00000196890,ENSG00000197903,ENSG00000233822,ENSG00000273703,ENSG00000273802,ENSG00000274290,ENSG00000276410,ENSG00000277224,ENSG00000278588,ENSG00000203814,ENSG00000234289,ENSG00000274641,ENSG00000275713,ENSG00000101812,ENSG00000123569,ENSG00000274559
WBGene00001890	his-16	-0.833764	0.158559	4 - 13	12 - 22	0	0	ZK131.10	HIST1H2AI,HIST2H2AC,HIST1H2AK,HIST1H2AL,HIST1H2AA,HIST1H2AC,HIST3H2A,HIST2H2AB,H2AFX,HIST1H2AG,HIST1H2AD,HIST2H2AA3,H2AFJ,HIST2H2AA4,HIST1H2AH,HIST1H2AJ,HIST1H2AE,HIST1H2AB,HIST1H2AM	ENSG00000196747,ENSG00000184260,ENSG00000275221,ENSG00000276903,ENSG00000164508,ENSG00000180573,ENSG00000181218,ENSG00000184270,ENSG00000188486,ENSG00000196787,ENSG00000196866,ENSG00000203812,ENSG00000246705,ENSG00000272196,ENSG00000274997,ENSG00000276368,ENSG00000277075,ENSG00000278463,ENSG00000278677
WBGene00001891	his-17	0.0246627	1	1 - 7	1 - 5	1.86667	0.916667	K06C4.5	HIST1H3J,HIST1H3D,HIST1H3G,HIST1H3B,HIST1H3E,HIST1H3I,HIST1H3A,HIST1H3F,HIST1H3C,HIST1H3H,HIST2H3D,HIST2H3C,HIST2H3A,HIST2H3PS2,HIST3H3,H3F3B,H3F3A	ENSG00000197153,ENSG00000197409,ENSG00000273983,ENSG00000274267,ENSG00000274750,ENSG00000275379,ENSG00000275714,ENSG00000277775,ENSG00000278272,ENSG00000278828,ENSG00000183598,ENSG00000203811,ENSG00000203852,ENSG00000203818,ENSG00000168148,ENSG00000132475,ENSG00000163041,ENSG00000178458
WBGene00001892	his-18	0.254903	1	3 - 8	1 - 5	2.19	0.593333	K06C4.10	HIST1H4H,HIST1H4C,HIST1H4J,HIST4H4,HIST2H4B,HIST2H4A,HIST1H4I,HIST1H4B,HIST1H4K,HIST1H4E,HIST1H4D,HIST1H4A,HIST1H4F,HIST1H4L,HIST1H4G	ENSG00000158406,ENSG00000197061,ENSG00000197238,ENSG00000197837,ENSG00000270276,ENSG00000270882,ENSG00000276180,ENSG00000278705,ENSG00000273542,ENSG00000276966,ENSG00000277157,ENSG00000278637,ENSG00000274618,ENSG00000275126,ENSG00000275663
WBGene00001898	his-24	0.529727	0.0600735	2711 - 3586	1239 - 3186	150.363	85.7267	M163.3	H1F0,HIST1H1E,HIST1H1B	ENSG00000189060,ENSG00000168298,ENSG00000184357
WBGene00001899	his-25	-0.0132414	0.985845	6 - 12	3 - 15	4.48667	4.45333	ZK131.2	HIST1H3J,HIST1H3D,HIST1H3G,HIST1H3B,HIST1H3E,HIST1H3I,HIST1H3A,HIST1H3F,HIST1H3C,HIST1H3H,HIST2H3D,HIST2H3C,HIST2H3A,HIST2H3PS2,HIST3H3,H3F3B,H3F3A	ENSG00000197153,ENSG00000197409,ENSG00000273983,ENSG00000274267,ENSG00000274750,ENSG00000275379,ENSG00000275714,ENSG00000277775,ENSG00000278272,ENSG00000278828,ENSG00000183598,ENSG00000203811,ENSG00000203852,ENSG00000203818,ENSG00000168148,ENSG00000132475,ENSG00000163041,ENSG00000178458
WBGene00001905	his-31	0.00142449	0.998583	7 - 19	8 - 15	1.57667	1.26333	F17E9.12	HIST1H4H,HIST1H4C,HIST1H4J,HIST4H4,HIST2H4B,HIST2H4A,HIST1H4I,HIST1H4B,HIST1H4K,HIST1H4E,HIST1H4D,HIST1H4A,HIST1H4F,HIST1H4L,HIST1H4G,HIST1H2AI	ENSG00000158406,ENSG00000197061,ENSG00000197238,ENSG00000197837,ENSG00000270276,ENSG00000270882,ENSG00000276180,ENSG00000278705,ENSG00000273542,ENSG00000276966,ENSG00000277157,ENSG00000278637,ENSG00000274618,ENSG00000275126,ENSG00000275663,ENSG00000196747
WBGene00001906	his-32	-0.0162278	0.97208	63 - 93	61 - 70	6.31	5.45333	F17E9.10	HIST1H3J,HIST1H3D,HIST1H3G,HIST1H3B,HIST1H3E,HIST1H3I,HIST1H3A,HIST1H3F,HIST1H3C,HIST1H3H,HIST2H3D,HIST2H3C,HIST2H3A,HIST2H3PS2,HIST3H3,H3F3B,H3F3A	ENSG00000197153,ENSG00000197409,ENSG00000273983,ENSG00000274267,ENSG00000274750,ENSG00000275379,ENSG00000275714,ENSG00000277775,ENSG00000278272,ENSG00000278828,ENSG00000183598,ENSG00000203811,ENSG00000203852,ENSG00000203818,ENSG00000168148,ENSG00000132475,ENSG00000163041,ENSG00000178458
WBGene00001909	his-35	-0.310089	0.0501684	1540 - 1879	1744 - 1983	161.44	162.243	C50F4.13	HIST2H2AC,HIST1H2AI,HIST1H2AA,HIST1H2AC,HIST3H2A,HIST2H2AB,H2AFX,HIST1H2AD,HIST1H2AK,HIST1H2AL,HIST1H2AG,HIST2H2AA3,H2AFJ,HIST2H2AA4,HIST1H2AJ,HIST1H2AE,HIST1H2AM,HIST1H2AH,HIST1H2AB	ENSG00000184260,ENSG00000196747,ENSG00000164508,ENSG00000180573,ENSG00000181218,ENSG00000184270,ENSG00000188486,ENSG00000196866,ENSG00000275221,ENSG00000276903,ENSG00000196787,ENSG00000203812,ENSG00000246705,ENSG00000272196,ENSG00000276368,ENSG00000277075,ENSG00000278677,ENSG00000274997,ENSG00000278463
WBGene00001910	C50F4.6	-0.983264	2.10511e-13	941 - 1205	1671 - 2045	72.7633	114.797	C50F4.6
WBGene00001911	his-37	0.271961	0.0433854	1693 - 1960	1190 - 1500	189.257	126.743	C50F4.7	HIST1H4H,HIST1H4C,HIST1H4J,HIST4H4,HIST2H4B,HIST2H4A,HIST1H4I,HIST1H4B,HIST1H4K,HIST1H4E,HIST1H4D,HIST1H4A,HIST1H4F,HIST1H4L,HIST1H4G	ENSG00000158406,ENSG00000197061,ENSG00000197238,ENSG00000197837,ENSG00000270276,ENSG00000270882,ENSG00000276180,ENSG00000278705,ENSG00000273542,ENSG00000276966,ENSG00000277157,ENSG00000278637,ENSG00000274618,ENSG00000275126,ENSG00000275663
WBGene00001912	his-38	0.0489025	0.914609	55 - 86	49 - 73	8.97667	6.75667	K03A1.6	HIST1H4C,HIST1H4H,HIST1H4J,HIST4H4,HIST2H4B,HIST2H4A,HIST1H4I,HIST1H4B,HIST1H4K,HIST1H4E,HIST1H4D,HIST1H4A,HIST1H4F,HIST1H4L,HIST1H4G	ENSG00000197061,ENSG00000158406,ENSG00000197238,ENSG00000197837,ENSG00000270276,ENSG00000270882,ENSG00000276180,ENSG00000278705,ENSG00000273542,ENSG00000276966,ENSG00000277157,ENSG00000278637,ENSG00000274618,ENSG00000275126,ENSG00000275663
WBGene00001914	his-40	-0.0578368	0.91038	37 - 61	36 - 58	4.45333	3.92667	K03A1.1	HIST1H3J,HIST1H3D,HIST1H3G,HIST1H3B,HIST1H3E,HIST1H3I,HIST1H3A,HIST1H3F,HIST1H3C,HIST1H3H,HIST2H3D,HIST2H3C,HIST2H3A,HIST3H3,HIST2H3PS2	ENSG00000197153,ENSG00000197409,ENSG00000273983,ENSG00000274267,ENSG00000274750,ENSG00000275379,ENSG00000275714,ENSG00000277775,ENSG00000278272,ENSG00000278828,ENSG00000183598,ENSG00000203811,ENSG00000203852,ENSG00000168148,ENSG00000203818
WBGene00001915	his-41	-0.0590175	0.730534	972 - 1209	901 - 1196	144.76	117.737	C50F4.5	HIST1H2BJ,HIST1H2BA,HIST1H2BD,HIST2H2BE,HIST1H2BL,HIST3H2BB,HIST1H2BK,HIST1H2BC,HIST1H2BN,HIST1H2BM,HIST1H2BB,HIST1H2BI,HIST2H2BF,H2BFS,HIST1H2BG,HIST1H2BE,HIST1H2BF,HIST1H2BO,HIST1H2BH,H2BFM,H2BFWT	ENSG00000124635,ENSG00000146047,ENSG00000158373,ENSG00000184678,ENSG00000185130,ENSG00000196890,ENSG00000197903,ENSG00000180596,ENSG00000233822,ENSG00000273703,ENSG00000276410,ENSG00000278588,ENSG00000203814,ENSG00000234289,ENSG00000273802,ENSG00000274290,ENSG00000277224,ENSG00000274641,ENSG00000275713,ENSG00000101812,ENSG00000123569,ENSG00000274559
WBGene00001919	his-45	-0.57495	0.364555	0 - 5	4 - 12	3.19333	3.46333	B0035.10	HIST1H3J,HIST1H3D,HIST1H3G,HIST1H3B,HIST1H3E,HIST1H3I,HIST1H3A,HIST1H3F,HIST1H3C,HIST1H3H,HIST2H3D,HIST2H3C,HIST2H3A,HIST2H3PS2,HIST3H3,H3F3B,H3F3A	ENSG00000197153,ENSG00000197409,ENSG00000273983,ENSG00000274267,ENSG00000274750,ENSG00000275379,ENSG00000275714,ENSG00000277775,ENSG00000278272,ENSG00000278828,ENSG00000183598,ENSG00000203811,ENSG00000203852,ENSG00000203818,ENSG00000168148,ENSG00000132475,ENSG00000163041,ENSG00000178458
WBGene00001921	his-47	-0.341423	0.616261	2 - 7	4 - 8	5.42	8.91	B0035.7	HIST1H2AI,HIST2H2AC,HIST1H2AK,HIST1H2AL,HIST1H2AA,HIST1H2AC,HIST3H2A,HIST2H2AB,H2AFX,HIST1H2AG,HIST1H2AD,HIST2H2AA3,H2AFJ,HIST2H2AA4,HIST1H2AH,HIST1H2AJ,HIST1H2AE,HIST1H2AB,HIST1H2AM	ENSG00000196747,ENSG00000184260,ENSG00000275221,ENSG00000276903,ENSG00000164508,ENSG00000180573,ENSG00000181218,ENSG00000184270,ENSG00000188486,ENSG00000196787,ENSG00000196866,ENSG00000203812,ENSG00000246705,ENSG00000272196,ENSG00000274997,ENSG00000276368,ENSG00000277075,ENSG00000278463,ENSG00000278677
WBGene00001922	his-48	-0.569212	0.162557	30 - 46	40 - 60	13.4233	17.34	B0035.8	HIST1H2BJ,HIST1H2BD,HIST1H2BL,HIST1H2BK,HIST2H2BF,HIST1H2BA,HIST1H2BC,HIST2H2BE,HIST3H2BB,HIST1H2BN,HIST1H2BM,HIST1H2BO,HIST1H2BH,H2BFS,HIST1H2BG,HIST1H2BE,HIST1H2BB,HIST1H2BF,HIST1H2BI,H2BFM,H2BFWT	ENSG00000124635,ENSG00000158373,ENSG00000185130,ENSG00000197903,ENSG00000203814,ENSG00000146047,ENSG00000180596,ENSG00000184678,ENSG00000196890,ENSG00000233822,ENSG00000273703,ENSG00000274641,ENSG00000275713,ENSG00000234289,ENSG00000273802,ENSG00000274290,ENSG00000276410,ENSG00000277224,ENSG00000278588,ENSG00000101812,ENSG00000123569,ENSG00000274559
WBGene00001931	his-57	-0.875375	0.0997745	7 - 14	19 - 23	8.12333	13.73	F54E12.5	HIST2H2AC,HIST1H2AI,HIST1H2AA,HIST1H2AC,HIST3H2A,HIST2H2AB,H2AFX,HIST1H2AD,HIST1H2AK,HIST1H2AL,HIST1H2AG,HIST2H2AA3,H2AFJ,HIST2H2AA4,HIST1H2AJ,HIST1H2AE,HIST1H2AM,HIST1H2AH,HIST1H2AB	ENSG00000184260,ENSG00000196747,ENSG00000164508,ENSG00000180573,ENSG00000181218,ENSG00000184270,ENSG00000188486,ENSG00000196866,ENSG00000275221,ENSG00000276903,ENSG00000196787,ENSG00000203812,ENSG00000246705,ENSG00000272196,ENSG00000276368,ENSG00000277075,ENSG00000278677,ENSG00000274997,ENSG00000278463
WBGene00001933	his-59	-0.0636967	0.867802	93 - 132	85 - 113	6.93333	5.81333	F55G1.2	HIST1H3J,HIST1H3D,HIST1H3G,HIST1H3B,HIST1H3E,HIST1H3I,HIST1H3A,HIST1H3F,HIST1H3C,HIST1H3H,HIST2H3D,HIST2H3C,HIST2H3A,HIST2H3PS2,HIST3H3,H3F3B,H3F3A	ENSG00000197153,ENSG00000197409,ENSG00000273983,ENSG00000274267,ENSG00000274750,ENSG00000275379,ENSG00000275714,ENSG00000277775,ENSG00000278272,ENSG00000278828,ENSG00000183598,ENSG00000203811,ENSG00000203852,ENSG00000203818,ENSG00000168148,ENSG00000132475,ENSG00000163041,ENSG00000178458
WBGene00001934	his-60	-0.153964	0.58391	140 - 172	132 - 177	17.0667	15.4767	F55G1.11	HIST1H4H,HIST1H4C,HIST1H4J,HIST4H4,HIST2H4B,HIST2H4A,HIST1H4I,HIST1H4B,HIST1H4D,HIST1H4K,HIST1H4E,HIST1H4A,HIST1H4F,HIST1H4L,HIST1H4G	ENSG00000158406,ENSG00000197061,ENSG00000197238,ENSG00000197837,ENSG00000270276,ENSG00000270882,ENSG00000276180,ENSG00000278705,ENSG00000277157,ENSG00000273542,ENSG00000276966,ENSG00000278637,ENSG00000274618,ENSG00000275126,ENSG00000275663
WBGene00001935	his-61	-0.203332	0.54369	94 - 134	95 - 129	11.61	10.62	F55G1.10	HIST1H2AI,HIST2H2AC,HIST1H2AK,HIST1H2AL,HIST1H2AA,HIST1H2AC,HIST3H2A,HIST2H2AB,H2AFX,HIST1H2AG,HIST1H2AD,HIST2H2AA3,H2AFJ,HIST2H2AA4,HIST1H2AH,HIST1H2AJ,HIST1H2AE,HIST1H2AB,HIST1H2AM	ENSG00000196747,ENSG00000184260,ENSG00000275221,ENSG00000276903,ENSG00000164508,ENSG00000180573,ENSG00000181218,ENSG00000184270,ENSG00000188486,ENSG00000196787,ENSG00000196866,ENSG00000203812,ENSG00000246705,ENSG00000272196,ENSG00000274997,ENSG00000276368,ENSG00000277075,ENSG00000278463,ENSG00000278677
WBGene00001936	his-62	-0.924854	0.000296454	97 - 132	192 - 227	8.63667	13.72	F55G1.3	HIST1H2BJ,HIST1H2BA,HIST1H2BD,HIST1H2BC,HIST2H2BE,HIST1H2BL,HIST3H2BB,HIST1H2BK,HIST1H2BN,HIST1H2BM,HIST1H2BG,HIST1H2BE,HIST1H2BB,HIST1H2BF,HIST1H2BI,HIST2H2BF,H2BFS,HIST1H2BO,HIST1H2BH,H2BFM,H2BFWT	ENSG00000124635,ENSG00000146047,ENSG00000158373,ENSG00000180596,ENSG00000184678,ENSG00000185130,ENSG00000196890,ENSG00000197903,ENSG00000233822,ENSG00000273703,ENSG00000273802,ENSG00000274290,ENSG00000276410,ENSG00000277224,ENSG00000278588,ENSG00000203814,ENSG00000234289,ENSG00000274641,ENSG00000275713,ENSG00000101812,ENSG00000123569,ENSG00000274559
WBGene00001937	his-63	-0.157834	0.739742	35 - 44	33 - 44	4.97333	4.82	F22B3.2	HIST1H3J,HIST1H3D,HIST1H3G,HIST1H3B,HIST1H3E,HIST1H3I,HIST1H3A,HIST1H3F,HIST1H3C,HIST1H3H,HIST2H3D,HIST2H3C,HIST2H3A,HIST2H3PS2,HIST3H3,H3F3B,H3F3A	ENSG00000197153,ENSG00000197409,ENSG00000273983,ENSG00000274267,ENSG00000274750,ENSG00000275379,ENSG00000275714,ENSG00000277775,ENSG00000278272,ENSG00000278828,ENSG00000183598,ENSG00000203811,ENSG00000203852,ENSG00000203818,ENSG00000168148,ENSG00000132475,ENSG00000163041,ENSG00000178458
WBGene00001938	his-64	-0.149803	0.78546	24 - 43	26 - 43	5.23333	4.93333	F22B3.1	HIST1H4H,HIST1H4C,HIST1H4J,HIST4H4,HIST2H4A,HIST2H4B,HIST1H4I,HIST1H4B,HIST1H4K,HIST1H4E,HIST1H4D,HIST1H4A,HIST1H4F,HIST1H4L,HIST1H4G	ENSG00000158406,ENSG00000197061,ENSG00000197238,ENSG00000197837,ENSG00000270882,ENSG00000270276,ENSG00000276180,ENSG00000278705,ENSG00000273542,ENSG00000276966,ENSG00000277157,ENSG00000278637,ENSG00000274618,ENSG00000275126,ENSG00000275663
WBGene00001940	his-66	-0.421828	0.499129	8 - 13	11 - 15	10.86	9.54	H02I12.6	HIST1H2BJ,HIST1H2BA,HIST1H2BD,HIST2H2BE,HIST1H2BL,HIST3H2BB,HIST1H2BK,HIST1H2BC,HIST1H2BN,HIST1H2BM,HIST1H2BB,HIST1H2BI,HIST2H2BF,H2BFS,HIST1H2BG,HIST1H2BE,HIST1H2BF,HIST1H2BO,HIST1H2BH,H2BFM,H2BFWT	ENSG00000124635,ENSG00000146047,ENSG00000158373,ENSG00000184678,ENSG00000185130,ENSG00000196890,ENSG00000197903,ENSG00000180596,ENSG00000233822,ENSG00000273703,ENSG00000276410,ENSG00000278588,ENSG00000203814,ENSG00000234289,ENSG00000273802,ENSG00000274290,ENSG00000277224,ENSG00000274641,ENSG00000275713,ENSG00000101812,ENSG00000123569,ENSG00000274559
WBGene00001941	his-67	-0.0306003	0.944016	82 - 88	66 - 92	9.40333	7.67	T23D8.5	HIST1H4H,HIST1H4C,HIST1H4J,HIST4H4,HIST2H4B,HIST2H4A,HIST1H4I,HIST1H4B,HIST1H4A,HIST1H4K,HIST1H4E,HIST1H4D,HIST1H4F,HIST1H4L,HIST1H4G	ENSG00000158406,ENSG00000197061,ENSG00000197238,ENSG00000197837,ENSG00000270276,ENSG00000270882,ENSG00000276180,ENSG00000278705,ENSG00000278637,ENSG00000273542,ENSG00000276966,ENSG00000277157,ENSG00000274618,ENSG00000275126,ENSG00000275663
WBGene00001942	his-68	-0.707293	0.00225011	330 - 456	472 - 648	36.9	49.38	T23D8.6	HIST1H2AI,HIST2H2AC,HIST1H2AK,HIST1H2AL,HIST1H2AA,HIST1H2AC,HIST3H2A,HIST2H2AB,H2AFX,HIST1H2AG,HIST1H2AD,HIST2H2AA3,H2AFJ,HIST2H2AA4,HIST1H2AH,HIST1H2AJ,HIST1H2AE,HIST1H2AB,HIST1H2AM	ENSG00000196747,ENSG00000184260,ENSG00000275221,ENSG00000276903,ENSG00000164508,ENSG00000180573,ENSG00000181218,ENSG00000184270,ENSG00000188486,ENSG00000196787,ENSG00000196866,ENSG00000203812,ENSG00000246705,ENSG00000272196,ENSG00000274997,ENSG00000276368,ENSG00000277075,ENSG00000278463,ENSG00000278677
WBGene00001944	his-70	0.0617224	1	3 - 5	0 - 9	0.47	0.24	E03A3.4	H3F3B,H3F3A	ENSG00000132475,ENSG00000163041
WBGene00001945	his-71	1.07367	2.75744e-10	883 - 1029	304 - 518	74.1133	28.41	F45E1.6	H3F3B,H3F3A,HIST1H3J,HIST1H3D,HIST2H3PS2,H3F3C,HIST2H3D,HIST2H3C,HIST2H3A	ENSG00000132475,ENSG00000163041,ENSG00000197153,ENSG00000197409,ENSG00000203818,ENSG00000188375,ENSG00000183598,ENSG00000203811,ENSG00000203852,ENSG00000178458
WBGene00001946	his-72	-0.167909	0.258021	7791 - 9100	6801 - 10339	606.03	555.413	Y49E10.6	H3F3B,H3F3A,HIST1H3J,HIST1H3D,HIST2H3PS2,H3F3C,HIST2H3D,HIST2H3C,HIST2H3A	ENSG00000132475,ENSG00000163041,ENSG00000197153,ENSG00000197409,ENSG00000203818,ENSG00000188375,ENSG00000183598,ENSG00000203811,ENSG00000203852,ENSG00000178458
WBGene00001947	his-73	-0.608158	0.267063	9 - 22	18 - 29	1.37	1.87333	W09H1.2
WBGene00001948	hlh-1	1.08417	0.000369973	149 - 177	43 - 95	6.1	2.17333	B0304.1	MYF6,MYF5,MYOG,MYOD1	ENSG00000111046,ENSG00000111049,ENSG00000122180,ENSG00000129152
WBGene00001949	hlh-2	-0.108933	0.578698	1412 - 1698	1183 - 1956	39.5067	34.85	M05B5.5	TCF3,TCF12,TCF4	ENSG00000071564,ENSG00000140262,ENSG00000196628
WBGene00001950	hlh-3	-0.131679	0.68669	164 - 198	116 - 242	9.32	8.56333	T24B8.6	ASCL1,ASCL4,ASCL2	ENSG00000139352,ENSG00000187855,ENSG00000183734
WBGene00001951	hlh-4	0.262157	0.599174	30 - 48	21 - 36	2.44	1.66333	T05G5.2
WBGene00001952	hlh-6	-0.186193	0.739001	25 - 38	24 - 47	1.66	1.46333	T15H9.3	ASCL3,ASCL5,ASCL4	ENSG00000176009,ENSG00000232237,ENSG00000187855
WBGene00001953	hlh-8	0.231199	0.698669	19 - 26	13 - 22	1.56333	1.13333	C02B8.4	TWIST1,TWIST2,TCF15,SCX	ENSG00000122691,ENSG00000233608,ENSG00000125878,ENSG00000260428
WBGene00001954	hlh-10	0.218286	0.756701	7 - 9	2 - 7	0.516667	0.303333	ZK682.4	TCF21,MSC,TCF24	ENSG00000118526,ENSG00000178860,ENSG00000261787
WBGene00001955	hlh-11	0.450194	0.00166635	1295 - 1400	728 - 943	28.27	17.4367	F58A4.7	TFAP4	ENSG00000090447
WBGene00001956	hlh-12	-0.586887	0.326846	7 - 11	9 - 19	0.793333	1.25	C28C12.8
WBGene00001957	hlh-13	0.0759909	0.912024	11 - 17	10 - 13	1.00333	0.666667	F48D6.3	PTF1A,FERD3L	ENSG00000168267,ENSG00000146618
WBGene00001958	hlh-14	-0.362437	0.364889	55 - 60	42 - 88	2.7	3.04667	C18A3.8	ASCL1	ENSG00000139352
WBGene00001959	hlh-15	0.867727	0.154035	4 - 14	1 - 3	1.33667	0.356667	C43H6.8	NHLH1,NHLH2	ENSG00000171786,ENSG00000177551
WBGene00001960	hlh-16	1.06099	0.0125633	43 - 75	14 - 26	4.72333	1.60333	DY3.3	BHLHE23,OLIG3,BHLHE22,OLIG1,OLIG2	ENSG00000125533,ENSG00000177468,ENSG00000180828,ENSG00000184221,ENSG00000205927
WBGene00001962	hlh-19	0.0503857	0.946236	1 - 8	1 - 6	0.306667	0.196667	F57C12.3
WBGene00001963	btb-1	-0.488127	0.140723	58 - 62	68 - 82	2.24	2.60333	F40G9.4
WBGene00001971	hmg-1.1	-0.392989	0.0221033	11235 - 12800	12718 - 15052	755.14	796.873	Y48B6A.14	HMGB3,HMGB2,HMGB4,HMGB1	ENSG00000029993,ENSG00000164104,ENSG00000176256,ENSG00000189403
WBGene00001972	hmg-1.2	-0.160487	0.172239	2764 - 3091	2670 - 3155	55.84	50.5033	F47D12.4	HMGB2,HMGB3,HMGB1,HMGB4	ENSG00000164104,ENSG00000029993,ENSG00000189403,ENSG00000176256,ENSG00000124097,ENSG00000225051
WBGene00001973	hmg-3	-0.171447	0.172205	5216 - 5602	4923 - 5528	78.0967	70.9267	C32F10.5	SSRP1	ENSG00000149136
WBGene00001974	hmg-4	-0.257376	0.0166418	5258 - 5844	5022 - 6772	98.9767	96.1067	T20B12.8	SSRP1	ENSG00000149136
WBGene00001975	hmg-5	-0.474864	0.00147408	2026 - 2528	2576 - 2759	121.943	136.433	F45E4.9	TFAM	ENSG00000108064
WBGene00001976	hmg-11	-0.00216048	0.992668	2458 - 3145	1836 - 3477	224.98	185.347	T05A7.4	HMGA2	ENSG00000149948
WBGene00001977	hmg-12	-0.815881	0.000233603	8511 - 9800	10610 - 16642	361.503	515.947	Y17G7A.1
WBGene00001978	hmp-1	-0.216946	0.0826191	4617 - 5043	4449 - 5312	61.87	57.5933	R13H4.4	CTNNA2,CTNNA1,CTNNA3	ENSG00000066032,ENSG00000044115,ENSG00000183230
WBGene00001979	hmp-2	-0.290873	0.0300251	3958 - 4147	4164 - 4424	74.14	73.53	K05C4.6	CTNNB1,JUP	ENSG00000168036,ENSG00000173801
WBGene00001980	hmr-1	-0.13254	0.456928	5867 - 6327	5282 - 6488	60.9933	55	W02B9.1	FAT1,FAT2,FAT3,DCHS1,DCHS2,FAT4,CDH23	ENSG00000083857,ENSG00000086570,ENSG00000165323,ENSG00000166341,ENSG00000197410,ENSG00000196159,ENSG00000107736
WBGene00001981	hnd-1	-0.775462	0.00213881	136 - 157	162 - 312	7.11333	10.3767	C44C10.8
WBGene00001983	hoe-1	-0.219701	0.161901	6323 - 7085	6402 - 7085	120.603	112.67	E04A4.4	ELAC2,ELAC1	ENSG00000006744,ENSG00000141642
WBGene00001984	hog-1	2.0708	1.95282e-07	69 - 114	10 - 25	6.26333	0.876667	W06B11.4
WBGene00001985	hop-1	-0.783278	9.3487e-07	1176 - 1493	1848 - 1978	45.3333	64.0333	C18E3.8	PSEN1,PSEN2	ENSG00000080815,ENSG00000143801
WBGene00001986	hot-1	0.99511	0.0103123	79 - 98	18 - 55	3.84333	1.39667	F43D2.4
WBGene00001987	hot-2	1.01978	0.0272987	33 - 47	10 - 18	1.56333	0.54	Y39B6A.48
WBGene00001988	hot-3	0.65916	0.19903	26 - 31	12 - 15	1.68667	0.74	W02B8.5
WBGene00001989	hot-4	0.603339	0.156267	53 - 68	19 - 45	3.29	1.60333	T12A2.16
WBGene00001990	hot-5	0.733376	0.199671	17 - 24	5 - 17	1.71667	0.716667	K07A12.6
WBGene00001991	hot-6	0.467755	0.238472	56 - 85	35 - 50	4.02333	2.31333	C13G3.2
WBGene00001992	hot-7	0.896939	0.130005	15 - 34	2 - 14	1.04667	0.3	Y48B6A.9
WBGene00001993	hpd-1	0.61961	0.000225114	4137 - 4754	1991 - 3369	131.77	69.8533	T21C12.2	HPD	ENSG00000158104
WBGene00001994	hpk-1	-0.518353	0.000322914	796 - 825	830 - 1245	7.76333	10.6567	F20B6.8	HIPK2,HIPK3,HIPK1	ENSG00000064393,ENSG00000110422,ENSG00000163349
WBGene00001995	hpl-1	0.00945614	0.975959	216 - 252	153 - 264	12.8933	10.5433	K08H2.6	CBX1,CBX5,CBX3	ENSG00000108468,ENSG00000094916,ENSG00000122565
WBGene00001996	hpl-2	-0.418603	0.00339825	2415 - 2781	2926 - 3135	167.607	180.867	K01G5.2	CBX1,CBX5,CBX3	ENSG00000108468,ENSG00000094916,ENSG00000122565
WBGene00001997	hpr-9	-0.207564	0.262501	798 - 846	788 - 847	19.1033	17.72	Y39A1A.23	RAD9B,RAD9A	ENSG00000151164,ENSG00000172613
WBGene00001998	hpr-17	-0.200013	0.213314	1361 - 1554	1443 - 1525	36.4967	33.4667	F32A11.2	RAD17,RAD17	ENSG00000152942,ENSG00000276618
WBGene00001999	hrp-1	-0.268964	0.0861752	12532 - 13977	13300 - 14613	365.47	356.203	F42A6.7	HNRNPA1,HNRNPA3,HNRNPA2B1,HNRNPA1L2,HNRNPA0,DAZAP1	ENSG00000135486,ENSG00000170144,ENSG00000122566,ENSG00000139675,ENSG00000177733,ENSG00000071626,ENSG00000213300
WBGene00002000	hrp-2	0.212883	0.170586	8653 - 10235	6008 - 8243	159.507	110.997	F58D5.1	SYNCRIP,HNRNPR,HNRNPR,A1CF,RBM46,RBM47,DND1	ENSG00000135316,ENSG00000125944,ENSG00000282958,ENSG00000148584,ENSG00000151962,ENSG00000163694,ENSG00000256453
WBGene00002001	hars-1	-0.0567017	0.660304	4217 - 4957	3840 - 4652	103.95	87.5167	T11G6.1	HARS,HARS2	ENSG00000170445,ENSG00000112855
WBGene00002002	hsb-1	-0.449443	0.000297568	1452 - 1775	1708 - 2180	129.323	143.703	K08E7.2	HSBP1	ENSG00000230989
WBGene00002003	hse-5	-0.433054	0.00025849	2281 - 2480	2667 - 3060	43.2233	46.9733	B0285.5	GLCE	ENSG00000138604
WBGene00002004	hsf-1	-0.227131	0.0675782	2973 - 3131	2881 - 3323	52.5067	49.96	Y53C10A.12	HSF1,HSF4,HSF2	ENSG00000185122,ENSG00000102878,ENSG00000025156
WBGene00002005	hsp-1	0.155763	0.234369	80171 - 87948	61949 - 68975	1632.63	1183.49	F26D10.3	HSPA8,HSPA2,HSPA1B,HSPA1A,HSPA1L,HSPA1B,HSPA1A,HSPA1B,HSPA1B,HSPA1B,HSPA1A,HSPA1A,HSPA1A,HSPA6,HSPA1L,HSPA1L,HSPA1L,HSPA5,HSPA1L	ENSG00000109971,ENSG00000126803,ENSG00000204388,ENSG00000204389,ENSG00000204390,ENSG00000212866,ENSG00000215328,ENSG00000224501,ENSG00000231555,ENSG00000232804,ENSG00000234475,ENSG00000235941,ENSG00000237724,ENSG00000173110,ENSG00000206383,ENSG00000234258,ENSG00000236251,ENSG00000044574,ENSG00000226704
WBGene00002006	hsp-2	-0.238685	0.72266	6 - 12	9 - 15	0.506667	0.466667	K09C4.3
WBGene00002007	hsp-3	0.625108	9.73235e-05	16836 - 19893	8207 - 13771	311.373	164.81	C15H9.6	HSPA5,HSPA8,HSPA2,HSPA6,HSPA1B,HSPA1A,HSPA1L,HSPA1B,HSPA1A,HSPA1B,HSPA1B,HSPA1B,HSPA1A,HSPA1A,HSPA1A,HSPA1L,HSPA1L,HSPA1L,HSPA1L	ENSG00000044574,ENSG00000109971,ENSG00000126803,ENSG00000173110,ENSG00000204388,ENSG00000204389,ENSG00000204390,ENSG00000212866,ENSG00000215328,ENSG00000224501,ENSG00000231555,ENSG00000232804,ENSG00000234475,ENSG00000235941,ENSG00000237724,ENSG00000206383,ENSG00000234258,ENSG00000236251,ENSG00000226704
WBGene00002008	hsp-4	-0.249206	0.0133638	13562 - 15284	13643 - 16251	307.897	300.647	F43E2.8	HSPA5,HSPA8,HSPA2,HSPA6,HSPA1B,HSPA1A,HSPA1L,HSPA1B,HSPA1A,HSPA1B,HSPA1B,HSPA1B,HSPA1A,HSPA1A,HSPA1A,HSPA1L,HSPA1L,HSPA1L,HSPA1L	ENSG00000044574,ENSG00000109971,ENSG00000126803,ENSG00000173110,ENSG00000204388,ENSG00000204389,ENSG00000204390,ENSG00000212866,ENSG00000215328,ENSG00000224501,ENSG00000231555,ENSG00000232804,ENSG00000234475,ENSG00000235941,ENSG00000237724,ENSG00000206383,ENSG00000234258,ENSG00000236251,ENSG00000226704
WBGene00002010	hsp-6	0.250482	0.153752	20698 - 23529	15103 - 17442	364.067	244.747	C37H5.8	HSPA9	ENSG00000113013
WBGene00002011	hsp-12.2	1.5745	9.22137e-09	282 - 443	70 - 139	32.6867	8.48333	C14B9.1	CRYAB,HSPB6,CRYAA,HSPB1,HSPB2,HSPB8,HSPB3,HSPB2-C11orf52	ENSG00000109846,ENSG00000004776,ENSG00000160202,ENSG00000106211,ENSG00000170276,ENSG00000152137,ENSG00000169271,ENSG00000254445,ENSG00000276076
WBGene00002012	hsp-12.3	-0.586209	0.17125	31 - 53	41 - 82	3.86333	5.03667	F38E11.1	HSPB6,CRYAB,CRYAA,HSPB1,HSPB2,HSPB8,HSPB3,HSPB2-C11orf52	ENSG00000004776,ENSG00000109846,ENSG00000160202,ENSG00000106211,ENSG00000170276,ENSG00000152137,ENSG00000169271,ENSG00000254445,ENSG00000276076
WBGene00002013	hsp-12.6	0.0427339	0.953116	10 - 16	9 - 13	1.48667	0.776667	F38E11.2	HSPB6,CRYAB,CRYAA,HSPB1,HSPB2,HSPB8,HSPB3,HSPB2-C11orf52	ENSG00000004776,ENSG00000109846,ENSG00000160202,ENSG00000106211,ENSG00000170276,ENSG00000152137,ENSG00000169271,ENSG00000254445,ENSG00000276076
WBGene00002015	hsp-16.1	0.149308	1	0 - 2	0 - 0	98.7667	94.8833	T27E4.8	CRYAB,HSPB6,HSPB1,HSPB8,CRYAA,HSPB3,HSPB2,HSPB2-C11orf52	ENSG00000109846,ENSG00000004776,ENSG00000106211,ENSG00000152137,ENSG00000160202,ENSG00000169271,ENSG00000170276,ENSG00000254445,ENSG00000276076
WBGene00002016	hsp-16.2	-0.687481	0.0306483	163 - 451	372 - 434	21.5833	29.2467	Y46H3A.3	CRYAB,HSPB6,HSPB1,HSPB8,CRYAA,HSPB3,HSPB2,HSPB2-C11orf52	ENSG00000109846,ENSG00000004776,ENSG00000106211,ENSG00000152137,ENSG00000160202,ENSG00000169271,ENSG00000170276,ENSG00000254445,ENSG00000276076
WBGene00002018	hsp-16.41	-0.557641	0.187453	88 - 387	204 - 433	17.4133	22.42	Y46H3A.2	CRYAA,HSPB6,HSPB1,CRYAB,HSPB8,HSPB3,HSPB2,HSPB2-C11orf52	ENSG00000160202,ENSG00000276076,ENSG00000004776,ENSG00000106211,ENSG00000109846,ENSG00000152137,ENSG00000169271,ENSG00000170276,ENSG00000254445
WBGene00002021	hsp-17	-0.0718213	0.783902	1229 - 1605	941 - 1869	112.297	97.0633	F52E1.7	HSPB6,HSPB1,CRYAB,HSPB8,CRYAA,HSPB3,HSPB2,HSPB2-C11orf52	ENSG00000004776,ENSG00000106211,ENSG00000109846,ENSG00000152137,ENSG00000160202,ENSG00000169271,ENSG00000170276,ENSG00000254445,ENSG00000276076
WBGene00002023	hsp-25	0.49652	0.000369511	2270 - 2544	1255 - 1835	119.537	68.4867	C09B8.6	HSPB1,HSPB6,CRYAB,HSPB8,CRYAA,HSPB3,HSPB2,HSPB2-C11orf52	ENSG00000106211,ENSG00000004776,ENSG00000109846,ENSG00000152137,ENSG00000160202,ENSG00000169271,ENSG00000170276,ENSG00000254445
WBGene00002024	hsp-43	-0.194136	0.0887992	4173 - 4767	4111 - 4787	135.69	125.417	C14F11.5	HSPB6,HSPB1,CRYAB,HSPB8,CRYAA,HSPB3,HSPB2,HSPB2-C11orf52	ENSG00000004776,ENSG00000106211,ENSG00000109846,ENSG00000152137,ENSG00000160202,ENSG00000169271,ENSG00000170276,ENSG00000254445,ENSG00000276076
WBGene00002025	hsp-60	0.391159	0.00488804	9373 - 11322	6231 - 8126	187.713	116.143	Y22D7AL.5	HSPD1	ENSG00000144381
WBGene00002026	hsp-70	0.180511	0.581473	159 - 315	153 - 195	4.51	3.11	C12C8.1	HSPA8,HSPA2,HSPA6,HSPA1B,HSPA1A,HSPA1L,HSPA5,HSPA1B,HSPA1A,HSPA1B,HSPA1B,HSPA1B,HSPA1A,HSPA1A,HSPA1A,HSPA1L,HSPA1L,HSPA1L,HSPA1L	ENSG00000109971,ENSG00000126803,ENSG00000173110,ENSG00000204388,ENSG00000204389,ENSG00000204390,ENSG00000044574,ENSG00000212866,ENSG00000215328,ENSG00000224501,ENSG00000231555,ENSG00000232804,ENSG00000234475,ENSG00000235941,ENSG00000237724,ENSG00000206383,ENSG00000234258,ENSG00000236251,ENSG00000226704
WBGene00002027	hsr-9	-0.137796	0.376549	12462 - 13096	10577 - 13287	126.083	112.623	T05F1.6	TP53BP1	ENSG00000067369
WBGene00002028	hst-1	-0.271383	0.0232434	1804 - 1938	1739 - 2178	26.6733	26.24	F08B4.6	NDST2,NDST1,NDST4,NDST3	ENSG00000166507,ENSG00000070614,ENSG00000138653,ENSG00000164100,ENSG00000272916
WBGene00002029	hst-2	-0.349973	0.0620825	267 - 312	280 - 370	8.46667	8.77667	C34F6.4	HS2ST1	ENSG00000153936,ENSG00000267561
WBGene00002030	hst-3.1	0.330602	0.518696	27 - 37	16 - 30	1.29667	0.743333	F40H3.5	HS3ST1,HS3ST5	ENSG00000002587,ENSG00000249853
WBGene00002031	hst-6	-0.294307	0.128677	281 - 322	276 - 385	9.41667	9.27333	Y34B4A.3	HS6ST1,HS6ST2,HS6ST3	ENSG00000136720,ENSG00000171004,ENSG00000185352
WBGene00002032	htp-1	-0.400355	0.0100379	1993 - 2455	2419 - 2574	74.34	79.3867	F41H10.10	HORMAD1,HORMAD2	ENSG00000143452,ENSG00000176635
WBGene00002033	htp-2	-0.595841	0.000360252	1485 - 1766	1949 - 2239	51.09	62.5433	Y73B6BL.2	HORMAD1,HORMAD2	ENSG00000143452,ENSG00000176635
WBGene00002034	htp-3	-0.249516	0.0969058	3087 - 3316	3192 - 3401	54.4833	51.9333	F57C9.5
WBGene00002035	hum-1	-0.418942	0.0018148	3880 - 4186	4323 - 5066	44.7933	48.5933	F29D10.4	MYO1E,MYO1F,MYO1G,MYO1D,MYO1B,MYO1A,MYO1H,MYO1C	ENSG00000157483,ENSG00000142347,ENSG00000136286,ENSG00000176658,ENSG00000128641,ENSG00000166866,ENSG00000174527,ENSG00000197879
WBGene00002036	hum-2	-0.263461	0.0681877	6825 - 7290	6776 - 7955	78.88	82.5733	F36D4.3	MYO5A,MYO5B,MYO5C,MYO19,MYH13,MYH7B,MYH7,MYH1,MYH3,MYH2,MYH8,MYH15,MYH6,MYH9,MYH14,MYH10,MYH11	ENSG00000197535,ENSG00000167306,ENSG00000128833,ENSG00000278259,ENSG00000006788,ENSG00000078814,ENSG00000092054,ENSG00000109061,ENSG00000109063,ENSG00000125414,ENSG00000133020,ENSG00000144821,ENSG00000197616,ENSG00000100345,ENSG00000105357,ENSG00000133026,ENSG00000133392
WBGene00002037	hum-4	0.45262	0.0100642	867 - 999	496 - 644	8.64	5.57	F46C3.3	MYO15A,MYO15B	ENSG00000091536,ENSG00000266714
WBGene00002038	hum-5	0.168656	0.270418	2346 - 2357	1469 - 2224	27.8033	20.1067	T02C12.1	MYO1D,MYO1G,MYO1F,MYO1E,MYO1B,MYO1A,MYO1H,MYO1C	ENSG00000176658,ENSG00000136286,ENSG00000142347,ENSG00000157483,ENSG00000128641,ENSG00000166866,ENSG00000174527,ENSG00000197879
WBGene00002039	hum-6	1.61262	3.17087e-13	609 - 795	132 - 264	3.92333	0.99	T10H10.1	MYO7A,MYO7B,MYO15A,MYO10	ENSG00000137474,ENSG00000169994,ENSG00000091536,ENSG00000145555
WBGene00002040	hum-7	0.759546	0.00486427	307 - 361	102 - 204	2.29667	1.08	F56A6.2	MYO9A,MYO9B	ENSG00000066933,ENSG00000099331
WBGene00002041	hum-8	0.361814	0.0371325	1004 - 1114	535 - 881	10.5667	6.63667	Y66H1A.6	MYO6	ENSG00000196586
WBGene00002042	hus-1	-0.314103	0.0427772	526 - 660	583 - 721	26.6333	26.8733	H26D21.1	HUS1,HUS1B	ENSG00000136273,ENSG00000188996
WBGene00002043	hyl-1	-0.587853	2.55941e-06	1713 - 1785	2210 - 2355	47.42	58.3233	C09G4.1	CERS5,CERS4,CERS2,CERS6,CERS3	ENSG00000139624,ENSG00000090661,ENSG00000143418,ENSG00000172292,ENSG00000154227
WBGene00002044	hyl-2	-0.0382072	0.855904	966 - 1052	767 - 1222	28.1567	23.67	K02G10.6	CERS5,CERS4,CERS2,CERS6,CERS3	ENSG00000139624,ENSG00000090661,ENSG00000143418,ENSG00000172292,ENSG00000154227
WBGene00002045	icd-1	-0.153428	0.417444	31856 - 37234	31775 - 37535	1663.04	1485.07	C56C10.8	BTF3L4,BTF3	ENSG00000134717,ENSG00000145741
WBGene00002046	icln-1	-0.43252	0.0094624	1797 - 2291	2249 - 2504	106.663	116.63	C01F6.8	CLNS1A	ENSG00000074201
WBGene00002047	icp-1	-0.219045	0.0810139	4065 - 4444	4061 - 4705	79.7233	75.5233	Y39G10AR.13	INCENP	ENSG00000149503,ENSG00000167674
WBGene00002048	ida-1	1.63369	6.86547e-24	852 - 1020	237 - 276	14.4233	3.64333	B0244.2	PTPRN,PTPRN2	ENSG00000054356,ENSG00000155093
WBGene00002050	ifa-1	0.832246	1.30573e-09	1136 - 1187	546 - 603	24.5967	10.9333	F38B2.1	LMNB2,LMNB1,LMNA,LMNTD1	ENSG00000176619,ENSG00000113368,ENSG00000160789,ENSG00000152936
WBGene00002051	ifa-3	3.14204	5.08916e-33	242 - 276	19 - 24	5.17667	0.396667	F52E10.5	LMNB2,LMNB1,LMNA,LMNTD1	ENSG00000176619,ENSG00000113368,ENSG00000160789,ENSG00000152936
WBGene00002052	ifa-4	-1.08885	2.53757e-23	1554 - 1797	2870 - 3277	32.2667	55.9067	K05B2.3	LMNB2,LMNB1,LMNA,LMNTD1	ENSG00000176619,ENSG00000113368,ENSG00000160789,ENSG00000152936
WBGene00002053	ifb-1	0.210619	0.0806106	4660 - 4871	3200 - 4047	89.4733	61.6767	F10C1.2	LMNB2,LMNB1,LMNA,LMNTD1	ENSG00000176619,ENSG00000113368,ENSG00000160789,ENSG00000152936
WBGene00002054	ifb-2	0.645171	4.28421e-07	2707 - 3014	1412 - 1841	68.8667	35.64	F10C1.7	LMNB2,LMNB1,LMNA,LMNTD1,INA,DES	ENSG00000176619,ENSG00000113368,ENSG00000160789,ENSG00000152936,ENSG00000148798,ENSG00000175084
WBGene00002055	ifc-1	1.67306	4.94472e-08	236 - 546	89 - 126	10.1233	2.27667	F37B4.2	LMNB2,KRT71,KRT1,KRT76,KRT3	ENSG00000176619,ENSG00000139648,ENSG00000167768,ENSG00000185069,ENSG00000186442
WBGene00002056	ifc-2	-0.168306	0.35334	3590 - 4175	3419 - 3834	63.74	57.02	M6.1	LMNB2	ENSG00000176619
WBGene00002057	ifd-1	1.15269	1.53442e-07	366 - 485	132 - 215	8.91333	3.26	R04E5.10	LMNB2	ENSG00000176619
WBGene00002058	ifd-2	0.433274	0.0308298	522 - 679	347 - 386	15.73	9.12	F25E2.4	LMNB2,KRT85,KRT86,KRT15	ENSG00000176619,ENSG00000135443,ENSG00000170442,ENSG00000171346
WBGene00002059	ife-1	-0.549795	0.00117856	6297 - 7615	7919 - 9522	376.63	435.763	F53A2.6	EIF4E,EIF4E1B	ENSG00000151247,ENSG00000175766
WBGene00002060	ife-2	0.0665498	0.715713	1341 - 1602	1073 - 1554	73.04	57.3667	R04A9.4	EIF4E,EIF4E1B	ENSG00000151247,ENSG00000175766
WBGene00002061	ife-3	-0.497317	0.00777663	9564 - 10599	10575 - 13386	385.173	436.887	B0348.6	EIF4E,EIF4E1B	ENSG00000151247,ENSG00000175766
WBGene00002062	ife-4	0.00379661	0.988443	327 - 419	261 - 428	18.6567	15.28	C05D9.5	EIF4E2	ENSG00000135930
WBGene00002063	ife-5	-0.272756	0.216743	350 - 369	347 - 402	17.8033	17.77	Y57A10A.30	EIF4E,EIF4E1B	ENSG00000151247,ENSG00000175766
WBGene00002064	iff-1	-0.90964	5.69841e-07	20360 - 25042	31542 - 41774	1960.98	2992.48	T05G5.10	EIF5AL1,EIF5A2,EIF5A	ENSG00000253626,ENSG00000163577,ENSG00000132507
WBGene00002065	iff-2	0.586727	6.32382e-05	6983 - 8370	3661 - 5292	350.01	189.097	F54C9.1	EIF5AL1,EIF5A2,EIF5A	ENSG00000253626,ENSG00000163577,ENSG00000132507
WBGene00002066	ifg-1	0.106046	0.571678	13736 - 15239	8913 - 13875	161.663	123.08	M110.4	EIF4G3,EIF4G1,EIF4G2	ENSG00000075151,ENSG00000114867,ENSG00000110321
WBGene00002067	ifp-1	1.9074	1.63543e-17	459 - 691	113 - 163	9.19333	1.90333	C43C3.1	LMNB2	ENSG00000176619
WBGene00002068	ify-1	-0.426305	0.00422658	5352 - 5961	6407 - 7158	257.923	277.7	C27A2.3
WBGene00002069	ikb-1	1.25768	7.78055e-09	230 - 282	82 - 109	5.39667	1.76333	C04F12.3	BCL3,RAI14,ANKRD24,UACA,ANKRD35,POTED,POTEC,POTEG,POTEH,POTEM,NFKB2,NFKBIA,NFKBIB,NFKB1,NFKBIE,NFKBIB	ENSG00000069399,ENSG00000039560,ENSG00000089847,ENSG00000137831,ENSG00000198483,ENSG00000166351,ENSG00000183206,ENSG00000187537,ENSG00000198062,ENSG00000222036,ENSG00000077150,ENSG00000100906,ENSG00000104825,ENSG00000109320,ENSG00000146232,ENSG00000282905
WBGene00002070	ile-1	-0.387357	0.0102441	4308 - 4443	4721 - 5162	103.103	108.443	K07A1.8	LMAN1,LMAN1L	ENSG00000074695,ENSG00000140506
WBGene00002071	ile-2	-0.0141816	0.934424	1171 - 1234	972 - 1247	36.89	30.46	T04G9.3	LMAN2L,LMAN2	ENSG00000114988,ENSG00000169223
WBGene00002072	ima-1	-0.539325	1.82908e-05	3460 - 4433	4440 - 5585	84.0233	99.2067	T19B10.7	SPAG6	ENSG00000077327
WBGene00002073	ima-2	-0.795216	5.06096e-06	15551 - 17085	21268 - 26701	368.603	516.507	F26B1.3	SPAG6	ENSG00000077327
WBGene00002074	ima-3	-0.0265235	0.853517	9452 - 9846	7717 - 9487	144.81	119.943	F32E10.4	KPNA4,KPNA3,KPNA6,KPNA1,KPNA5	ENSG00000186432,ENSG00000102753,ENSG00000025800,ENSG00000114030,ENSG00000196911
WBGene00002075	imb-1	-0.106206	0.445211	4518 - 4616	3660 - 4914	52.2733	45.9433	F28B3.8	KPNB1	ENSG00000108424
WBGene00002076	imb-2	-0.071353	0.65954	5198 - 5624	4344 - 5384	69.9667	60.6633	R06A4.4	TNPO1,TNPO2	ENSG00000083312,ENSG00000105576
WBGene00002077	imb-3	-0.41792	0.0142036	21729 - 23845	24456 - 29414	249.813	269.263	C53D5.6	IPO5,RANBP6	ENSG00000065150,ENSG00000137040
WBGene00002078	xpo-1	-0.0613111	0.723911	15493 - 16840	12091 - 16071	166.42	145.147	ZK742.1	XPO1	ENSG00000082898
WBGene00002079	xpo-2	-0.511174	0.000555787	7173 - 7386	8443 - 9977	105.53	124.507	Y48G1A.5	CSE1L	ENSG00000124207
WBGene00002080	xpo-3	-0.175951	0.206077	2888 - 3405	2812 - 3559	36.35	33.4533	C49H3.10	XPOT	ENSG00000184575
WBGene00002081	ina-1	0.0660767	0.693481	1609 - 2042	1273 - 1761	18.7	14.5767	F54G8.3	ITGA6,ITGA3,ITGA7	ENSG00000091409,ENSG00000005884,ENSG00000135424
WBGene00002083	inf-1	0.126081	0.269449	16079 - 17398	12283 - 15818	434.157	328.387	F57B9.6	EIF4A2,EIF4A1	ENSG00000156976,ENSG00000161960
WBGene00002084	ins-1	1.21119	0.00948603	31 - 46	9 - 15	2.11333	0.636667	F13B12.5
WBGene00002085	ins-2	0.285429	0.542994	37 - 43	25 - 30	3.24333	2.05667	ZK75.2
WBGene00002086	ins-3	-0.183529	0.72916	23 - 45	30 - 39	2.61667	2.47333	ZK75.3
WBGene00002087	ins-4	0.91515	0.045995	59 - 61	12 - 46	4.79	1.8	ZK75.1
WBGene00002088	ins-5	0.908267	0.0154049	62 - 101	29 - 38	6.97667	2.62667	ZK84.3
WBGene00002089	ins-6	0.796515	0.183809	23 - 38	3 - 31	3.21333	1.15667	ZK84.6
WBGene00002090	ins-7	1.85239	4.33691e-09	324 - 447	49 - 144	51.0467	10.2467	ZK1251.2
WBGene00002092	ins-9	0.63123	0.308511	4 - 10	0 - 4	0.66	0.14	C06E2.8
WBGene00002093	ins-10	0.0423235	0.956571	4 - 5	1 - 7	0.553333	0.563333	T08G5.12
WBGene00002094	ins-11	-0.531752	0.336665	11 - 19	16 - 25	1.95333	2.11333	C17C3.4
WBGene00002097	ins-14	0.612044	0.336528	6 - 15	1 - 9	1.38667	0.48	F41G3.16
WBGene00002099	ins-16	0.236834	1	2 - 4	0 - 3	0.29	0.26	Y39A3A.5
WBGene00002100	ins-17	0.469141	0.0692401	183 - 253	109 - 163	16.5833	9.51	F56F3.6
WBGene00002101	ins-18	1.07489	0.00797466	55 - 69	14 - 33	5.67	1.92	T28B8.2
WBGene00002102	ins-19	-5.05288	3.46033e-71	6 - 13	365 - 476	1.48333	54.92	T10D4.13
WBGene00002105	ins-22	0.864895	0.0985759	24 - 32	7 - 19	4.75667	1.66667	M04D8.2
WBGene00002106	ins-23	1.45219	0.010381	12 - 31	1 - 5	2.68	0.37	M04D8.3
WBGene00002107	ins-24	-0.188007	0.792799	3 - 8	2 - 12	0.51	0.613333	ZC334.3
WBGene00002109	ins-26	1.14023	0.0384597	32 - 37	1 - 17	3.26667	0.813333	ZC334.1
WBGene00002110	ins-27	0.499646	0.159741	117 - 197	62 - 138	28.6967	16.6133	ZC334.11
WBGene00002111	ins-28	0.478899	0.422268	26 - 31	6 - 35	4.92667	2.55333	ZC334.9
WBGene00002112	ins-29	0.00065149	0.99899	11 - 17	8 - 15	2.95	2.44333	ZC334.10
WBGene00002113	ins-30	1.42839	0.0101304	33 - 56	1 - 21	2.93333	0.55	ZC334.2
WBGene00002114	ins-31	-0.205607	0.537265	0 - 0	0 - 104	0	2.08	T10D4.4
WBGene00002116	ins-33	1.83747	4.95681e-05	67 - 107	7 - 30	7.40333	1.28333	W09C5.4
WBGene00002117	ins-34	-0.210408	0.532209	136 - 204	126 - 262	19.6033	18.79	F52B11.6
WBGene00002118	ins-35	0.654013	0.120871	103 - 190	45 - 138	18.9833	9.44333	K02E2.4
WBGene00002119	ins-36	-0.413936	0.522394	6 - 11	7 - 17	1.39	1.41333	Y53H1A.4
WBGene00002120	ins-37	-0.847035	0.0127133	37 - 57	64 - 97	3.96	6.01667	F08G2.6
WBGene00002123	inx-1	1.74319	2.71171e-08	185 - 291	39 - 86	3.68	0.78	C16E9.4
WBGene00002124	inx-2	0.0896174	0.76579	2437 - 3377	1618 - 3667	76.4633	59.71	F08G12.10
WBGene00002125	inx-3	0.0953381	0.727734	4653 - 5120	2915 - 6316	121.67	94.6567	F22F4.2
WBGene00002127	inx-5	1.24582	1.45869e-10	1206 - 1279	353 - 666	30.2733	10.1067	R09F10.4
WBGene00002128	inx-6	2.03566	5.66819e-06	132 - 164	8 - 50	4.23	0.596667	C36H8.2
WBGene00002129	inx-7	0.102499	0.584071	679 - 800	555 - 605	19.24	15.08	K02B2.4
WBGene00002130	inx-8	-0.662083	1.28326e-06	2136 - 2474	3082 - 3154	73.2867	93.0567	ZK792.2
WBGene00002131	inx-9	-0.346677	0.0572989	494 - 694	601 - 667	19.4133	19.8433	ZK792.3
WBGene00002132	inx-10	0.157605	0.507245	244 - 257	173 - 241	5.19333	3.77667	T18H9.5
WBGene00002133	inx-11	-0.366289	0.060848	264 - 274	259 - 385	7.05667	7.52	W04D2.3
WBGene00002134	inx-12	1.05143	1.28215e-14	1897 - 2180	727 - 978	58.56	22.8433	ZK770.3
WBGene00002135	inx-13	1.15609	1.33173e-22	1624 - 1756	605 - 777	48.6533	17.5167	Y8G1A.2
WBGene00002136	inx-14	-0.554526	2.50085e-05	4030 - 4994	5598 - 5819	118.213	140.003	F07A5.1
WBGene00002137	inx-15	0.394101	0.0400903	636 - 776	364 - 622	23.7367	14.6733	R12E2.9
WBGene00002138	inx-16	0.103556	0.565038	544 - 632	419 - 551	15.88	12.0233	R12E2.5
WBGene00002139	inx-17	0.496759	0.0194338	268 - 302	142 - 219	9.87667	5.63667	R12E2.4
WBGene00002140	inx-18	0.960143	0.0290978	36 - 45	15 - 19	1.01	0.373333	C18H7.2
WBGene00002141	inx-19	0.255966	0.556634	46 - 58	34 - 40	1.37333	0.936667	T16H5.1
WBGene00002142	inx-20	0.199707	0.722289	20 - 30	17 - 22	0.686667	0.466667	T23H4.1
WBGene00002143	inx-21	-0.38133	0.0211704	1078 - 1175	1191 - 1300	26.6367	27.7167	Y47G6A.1
WBGene00002144	inx-22	-0.479355	0.00377328	3194 - 3627	3769 - 4387	87.73	98.1567	Y47G6A.2
WBGene00002146	ipp-5	0.0653166	0.773722	351 - 419	280 - 396	8.76333	6.87333	C09B8.1	INPP5A	ENSG00000068383
WBGene00002147	ire-1	-0.152383	0.265291	3842 - 4326	3508 - 4346	50.1167	45.9733	C41C4.4	ERN1,ERN2	ENSG00000178607,ENSG00000134398
WBGene00002148	gon-14	-0.142793	0.234549	3958 - 4136	3410 - 4365	50.3833	45.1767	F44C4.4
WBGene00002149	irk-1	0.828526	0.0630813	39 - 54	15 - 27	1.01333	0.406667	R03E9.4	KCNJ2,KCNJ12,KCNJ5,KCNJ6,KCNJ9,KCNJ3,KCNJ4,KCNJ14,KCNJ8,KCNJ1,KCNJ16,KCNJ15,KCNJ10,KCNJ11,KCNJ18	ENSG00000123700,ENSG00000184185,ENSG00000120457,ENSG00000157542,ENSG00000162728,ENSG00000162989,ENSG00000168135,ENSG00000182324,ENSG00000121361,ENSG00000151704,ENSG00000153822,ENSG00000157551,ENSG00000177807,ENSG00000187486,ENSG00000260458
WBGene00002150	irk-2	0.269782	0.622199	33 - 51	17 - 43	0.92	0.616667	M02A10.2	KCNJ12,KCNJ2,KCNJ4,KCNJ5,KCNJ6,KCNJ9,KCNJ14,KCNJ18,KCNJ3,KCNJ8,KCNJ1,KCNJ16,KCNJ15,KCNJ10,KCNJ11	ENSG00000184185,ENSG00000123700,ENSG00000168135,ENSG00000120457,ENSG00000157542,ENSG00000162728,ENSG00000182324,ENSG00000260458,ENSG00000162989,ENSG00000121361,ENSG00000151704,ENSG00000153822,ENSG00000157551,ENSG00000177807,ENSG00000187486
WBGene00002151	irk-3	-0.45209	0.150293	73 - 91	78 - 113	1.89667	2.15	K04G11.5	KCNJ13	ENSG00000115474
WBGene00002152	iars-1	0.0777438	0.596154	9688 - 9942	7252 - 8556	102.64	78.3367	R11A8.6	IARS,IARS2	ENSG00000196305,ENSG00000067704
WBGene00002153	iars-2	-0.0806265	0.656753	2863 - 3115	2362 - 3082	53.0767	46.3033	C25A1.7	IARS2,IARS	ENSG00000067704,ENSG00000196305
WBGene00002162	isp-1	0.00640704	0.97427	7406 - 8479	6691 - 6948	269.43	216.233	F42G8.12	UQCRFS1	ENSG00000169021
WBGene00002163	ist-1	0.490126	0.180533	78 - 142	53 - 73	1.22333	0.68	C54D1.3
WBGene00002169	isw-1	-0.264354	0.0410773	7116 - 7358	6974 - 7970	85.41	83.2633	F37A4.8	SMARCA1,SMARCA5	ENSG00000102038,ENSG00000153147
WBGene00002173	itr-1	-0.299714	0.174403	1681 - 2181	1507 - 2526	8.66667	8.73	F33D4.2	ITPR1,ITPR3,ITPR2	ENSG00000150995,ENSG00000096433,ENSG00000123104
WBGene00002174	itx-1	0.382299	0.0172609	1382 - 1562	816 - 1094	11.5467	7.17	W03D8.6	CNTNAP3,CNTNAP1,CNTNAP4,CNTNAP3B,CNTNAP5,CNTNAP2	ENSG00000106714,ENSG00000108797,ENSG00000152910,ENSG00000154529,ENSG00000155052,ENSG00000174469,ENSG00000283378
WBGene00002175	jac-1	0.453358	0.0112273	904 - 979	450 - 723	10.25	5.84667	Y105C5B.21	PKP4,CTNND2,ARVCF,CTNND1,PKP2,PKP1,PKP3	ENSG00000144283,ENSG00000169862,ENSG00000099889,ENSG00000198561,ENSG00000057294,ENSG00000081277,ENSG00000184363
WBGene00002176	jip-1	0.242194	0.34768	205 - 233	156 - 160	4.72667	3.48333	F56D12.4	MAPK8IP1,MAPK8IP2	ENSG00000121653,ENSG00000008735
WBGene00002177	jkk-1	1.3471	0.00972669	18 - 35	6 - 8	0.616667	0.133333	F35C8.3	MAP2K7	ENSG00000076984
WBGene00002178	jnk-1	1.35417	4.61352e-06	119 - 143	35 - 49	3.48	1.03333	B0478.1	MAPK9,MAPK8,MAPK10	ENSG00000050748,ENSG00000107643,ENSG00000109339
WBGene00002179	jph-1	1.3095	1.37018e-11	577 - 688	162 - 280	8.15	2.61	T22C1.7	JPH1,JPH2,JPH3,JPH4	ENSG00000104369,ENSG00000149596,ENSG00000154118,ENSG00000092051
WBGene00002180	jtr-1	-0.684041	0.000170898	891 - 982	1182 - 1456	64.2667	83.3933	Y77E11A.4	JTB	ENSG00000143543
WBGene00002181	kal-1	0.250538	0.310448	254 - 332	176 - 245	5.05333	3.47	K03D10.1	ANOS1	ENSG00000011201
WBGene00002182	kap-1	0.77959	0.00205181	157 - 221	78 - 118	3.33667	1.44667	F08F8.3	KIFAP3	ENSG00000075945
WBGene00002183	kat-1	-0.0232897	0.91572	3401 - 3920	2999 - 3458	109.5	89.3333	T02G5.8	ACAT1,ACAA2,ACAT2	ENSG00000075239,ENSG00000167315,ENSG00000120437
WBGene00002184	kel-1	0.54994	0.117029	67 - 80	39 - 46	2.33667	1.33	C47D12.7	KLHL3,KLHL2,KLHL17	ENSG00000146021,ENSG00000109466,ENSG00000187961
WBGene00002185	kel-3	-0.254895	0.0729713	1338 - 1594	1448 - 1540	31.1033	30.05	T27E9.4	KLHL18	ENSG00000114648
WBGene00002186	kel-10	1.28886	0.0260111	9 - 59	3 - 6	0.49	0.0866667	T16H12.6	KLHL10	ENSG00000161594
WBGene00002187	kgb-1	0.620055	1.21062e-05	924 - 957	457 - 656	23.9167	12.3533	T07A9.3
WBGene00002188	kgb-2	-0.19247	0.578704	72 - 85	68 - 90	2.56667	2.45667	ZC416.4
WBGene00002189	kin-1	0.784253	3.82257e-09	1170 - 1227	557 - 643	33.57	15.4333	ZK909.2	PRKACB,PRKACA,PRKACG,PRKX	ENSG00000142875,ENSG00000072062,ENSG00000165059,ENSG00000183943
WBGene00002190	kin-2	0.411836	0.00237255	1567 - 1657	952 - 1166	41.11	24.53	R07E4.6	PRKAR1B,PRKAR1A,PRKAR2B,PRKAR2A	ENSG00000188191,ENSG00000108946,ENSG00000005249,ENSG00000114302
WBGene00002191	kin-3	-0.00470637	0.975455	7640 - 8161	6690 - 7294	217.377	176.217	B0205.7	CSNK2A1,CSNK2A2,CSNK2A3	ENSG00000101266,ENSG00000070770,ENSG00000254598
WBGene00002192	kin-4	-0.461688	0.00353469	7975 - 8681	8623 - 11257	64.5367	72.6233	C10C6.1	MAST4,MAST2,MAST3,MAST1	ENSG00000069020,ENSG00000086015,ENSG00000099308,ENSG00000105613
WBGene00002193	kin-5	-0.148934	0.820545	8 - 36	18 - 22	0.47	0.46	T13H10.1	FER,FES	ENSG00000151422,ENSG00000182511
WBGene00002194	kin-6	0.0195758	0.974637	20 - 39	23 - 29	0.846667	0.776667	ZK20.2	FER,FES	ENSG00000151422,ENSG00000182511
WBGene00002195	kin-9	0.580344	0.166842	45 - 53	23 - 35	0.99	0.496667	F08F1.1	STYK1,PDGFRA	ENSG00000060140,ENSG00000134853
WBGene00002196	kin-10	-0.454208	0.00569886	5321 - 5955	6309 - 7338	218.31	240.763	T01G9.6	CSNK2B,CSNK2B,CSNK2B,CSNK2B,CSNK2B,CSNK2B,CSNK2B	ENSG00000204435,ENSG00000224774,ENSG00000206406,ENSG00000224398,ENSG00000228875,ENSG00000230700,ENSG00000232960,ENSG00000258543,ENSG00000258589,ENSG00000263020
WBGene00002198	kin-14	-0.708705	0.00464522	162 - 195	215 - 282	5.2	6.79333	F22D6.1	FER,FES	ENSG00000151422,ENSG00000182511
WBGene00002199	kin-15	0.726546	0.0627673	66 - 73	25 - 53	1.87667	0.886667	M176.6	STYK1,PDGFRA,FLT4,FLT1,KDR,PDGFRB,FLT3,KIT,CSF1R	ENSG00000060140,ENSG00000134853,ENSG00000037280,ENSG00000102755,ENSG00000128052,ENSG00000113721,ENSG00000122025,ENSG00000157404,ENSG00000182578
WBGene00002200	kin-16	1.15489	0.000348427	118 - 130	31 - 69	2.94667	0.996667	M176.7	STYK1,PDGFRA,FLT4,FLT1,KDR,PDGFRB,FLT3,KIT,CSF1R	ENSG00000060140,ENSG00000134853,ENSG00000037280,ENSG00000102755,ENSG00000128052,ENSG00000113721,ENSG00000122025,ENSG00000157404,ENSG00000182578
WBGene00002201	kin-18	-0.258295	0.0514018	5598 - 5942	5535 - 6255	59.9833	58.35	T17E9.1	TAOK1,TAOK3,TAOK2	ENSG00000160551,ENSG00000135090,ENSG00000149930
WBGene00002202	kin-19	-0.0229574	0.873251	8356 - 8715	7187 - 8086	183.05	149.63	C03C10.1	CSNK1A1,CSNK1A1L,CSNK1D,CSNK1E	ENSG00000113712,ENSG00000180138,ENSG00000141551,ENSG00000213923
WBGene00002203	kin-20	0.325677	0.0939425	929 - 1043	543 - 941	27.4867	18.1033	F46F2.2	CSNK1D,CSNK1E,CSNK1A1,CSNK1A1L	ENSG00000141551,ENSG00000213923,ENSG00000113712,ENSG00000180138,ENSG00000283900
WBGene00002204	kin-21	0.646079	1	2 - 10	0 - 2	0.12	0.0233333	W08D2.8	TESK2,LIMK1,TESK1,LIMK2	ENSG00000070759,ENSG00000106683,ENSG00000107140,ENSG00000182541
WBGene00002205	kin-23	0.551165	1	3 - 8	0 - 4	0.216667	0.06	W04G5.6	STYK1,PDGFRA,FLT4,FLT1,KDR,PDGFRB,FLT3,KIT,CSF1R	ENSG00000060140,ENSG00000134853,ENSG00000037280,ENSG00000102755,ENSG00000128052,ENSG00000113721,ENSG00000122025,ENSG00000157404,ENSG00000182578
WBGene00002207	sid-3	-0.089373	0.593314	1166 - 1278	949 - 1350	12.6367	11.0767	B0302.1	TNK2,TNK1,SIK3	ENSG00000061938,ENSG00000174292,ENSG00000160584
WBGene00002208	kin-26	0.202405	0.775102	2 - 8	2 - 6	0.173333	0.08	T06C10.6	FER,FES	ENSG00000151422,ENSG00000182511
WBGene00002210	kin-29	0.758984	3.91548e-06	615 - 666	299 - 341	7.35333	3.47667	F58H12.1	SIK1,SIK3,SIK2	ENSG00000142178,ENSG00000160584,ENSG00000170145,ENSG00000275993
WBGene00002211	kin-30	0.934746	0.118356	13 - 27	1 - 13	0.493333	0.133333	M01B2.1	STYK1,PDGFRA,FLT4,FLT1,KDR,PDGFRB,FLT3,KIT,CSF1R	ENSG00000060140,ENSG00000134853,ENSG00000037280,ENSG00000102755,ENSG00000128052,ENSG00000113721,ENSG00000122025,ENSG00000157404,ENSG00000182578
WBGene00002212	kin-31	0.228772	0.733864	10 - 14	7 - 9	0.32	0.126667	B0523.1
WBGene00002213	kin-32	0.498172	0.0361076	495 - 521	219 - 461	7.11333	4.03333	C30F8.4	PTK2,PTK2B	ENSG00000169398,ENSG00000120899
WBGene00002214	klc-1	-0.603917	0.000369782	4437 - 5124	5488 - 6598	107.463	131.873	M7.2	KLC3,NPHP3,KLC1,KLC4,KLC2,NPHP3-ACAD11	ENSG00000104892,ENSG00000113971,ENSG00000126214,ENSG00000137171,ENSG00000174996,ENSG00000256500,ENSG00000274810
WBGene00002215	klc-2	0.272816	0.0401072	2085 - 2220	1344 - 1948	44.0733	29.6233	C18C4.10	KLC1,KLC2,KLC4,KLC3,NPHP3,NPHP3-ACAD11	ENSG00000126214,ENSG00000174996,ENSG00000137171,ENSG00000256500,ENSG00000104892,ENSG00000113971,ENSG00000274810
WBGene00002216	klp-3	0.77801	4.92392e-05	380 - 402	167 - 249	7.79667	3.51333	T09A5.2	KIFC3,KIFC1,KIFC1,KIFC1,KIF25,KIFC2	ENSG00000140859,ENSG00000237649,ENSG00000204197,ENSG00000233450,ENSG00000125337,ENSG00000167702
WBGene00002217	klp-4	0.130819	0.510102	1276 - 1356	792 - 1324	9.98667	7.46	F56E3.3	KIF13A,KIF13B,KIF1B,KIF1C,KIF1A	ENSG00000137177,ENSG00000197892,ENSG00000054523,ENSG00000129250,ENSG00000130294,ENSG00000223519
WBGene00002218	klp-6	-0.0459088	0.933433	31 - 52	32 - 41	0.543333	0.44	R144.1	KIF13A,KIF13B,KIF1B,KIF1C,KIF1A	ENSG00000223519,ENSG00000137177,ENSG00000197892,ENSG00000054523,ENSG00000129250,ENSG00000130294
WBGene00002219	klp-7	-0.494338	0.0111768	3761 - 4083	4027 - 5140	66.96	75.96	K11D9.1	KIF2C,KIF2A,KIF2B,KIF24	ENSG00000142945,ENSG00000068796,ENSG00000141200,ENSG00000186638
WBGene00002221	klp-10	-0.506729	0.0172638	1870 - 2082	2027 - 2914	26.4867	30.4233	C33H5.4
WBGene00002222	klp-11	1.00541	3.71088e-07	555 - 574	178 - 330	19.9067	9.99	F20C5.2	KIF3B,KIF3C,KIF3A	ENSG00000101350,ENSG00000084731,ENSG00000131437
WBGene00002223	klp-12	0.0199224	0.913592	5221 - 5558	3794 - 5171	67.7467	55.9933	T01G1.1	KIF21A,KIF21B	ENSG00000139116,ENSG00000116852
WBGene00002224	klp-13	0.993923	0.0197441	42 - 53	16 - 20	0.69	0.21	F22F4.3	KIF19	ENSG00000196169
WBGene00002225	klp-15	-0.717358	0.000403837	4859 - 5210	5767 - 8000	103.35	137.293	M01E11.6	KIFC3,KIFC1,KIFC1	ENSG00000140859,ENSG00000237649,ENSG00000233450
WBGene00002226	klp-16	-0.617898	0.00232995	4762 - 5270	5452 - 7500	99.52	123.177	C41G7.2	KIFC3,KIFC1	ENSG00000140859,ENSG00000237649
WBGene00002227	klp-17	0.573401	0.36717	4 - 13	1 - 4	0.186667	0.0533333	W02B12.7	KIFC3,KIFC1,KIFC1,KIFC1	ENSG00000140859,ENSG00000237649,ENSG00000204197,ENSG00000233450
WBGene00002228	klp-18	-0.363457	0.0331211	4839 - 5147	5176 - 6117	65.4533	68.0033	C06G3.2	KIF15,KIF15	ENSG00000163808,ENSG00000280610
WBGene00002229	klp-19	-0.533584	0.000259811	9782 - 10237	11957 - 13612	110.17	128.963	Y43F4B.6	KIF4A,KIF4B	ENSG00000090889,ENSG00000226650
WBGene00002230	klp-20	0.334514	0.112861	310 - 358	195 - 257	6.02	3.78	Y50D7A.6	KIF3A,KIF3C,KIF3B	ENSG00000131437,ENSG00000084731,ENSG00000101350
WBGene00002231	knl-1	-0.107904	0.413373	6132 - 6406	5052 - 6628	71.6833	62.5833	C02F5.1
WBGene00002232	kpc-1	0.325073	0.0750631	716 - 802	423 - 709	12.9733	8.39333	F11A6.1	FURIN,PCSK4,PCSK6,PCSK5,PCSK1,PCSK7	ENSG00000140564,ENSG00000115257,ENSG00000140479,ENSG00000099139,ENSG00000175426,ENSG00000160613
WBGene00002233	kqt-1	0.524527	0.0444237	160 - 179	82 - 132	2.48333	1.42	C25B8.1	KCNQ4,KCNQ5,KCNQ2,KCNQ3	ENSG00000117013,ENSG00000185760,ENSG00000075043,ENSG00000184156
WBGene00002234	kqt-2	-0.748129	0.00104862	162 - 204	212 - 361	3.01	4.12	M60.5	KCNQ2,KCNQ4,KCNQ3,KCNQ5	ENSG00000075043,ENSG00000117013,ENSG00000184156,ENSG00000185760
WBGene00002235	kqt-3	0.364257	0.215077	123 - 145	78 - 96	2.67333	1.58667	Y54G9A.3	KCNQ1	ENSG00000053918
WBGene00002238	kars-1	-0.386656	0.0198605	15448 - 16200	16380 - 19234	333.707	351.817	T02G5.9	KARS	ENSG00000065427
WBGene00002239	ksr-1	0.0840408	0.706076	631 - 682	405 - 714	9.67667	7.50333	F13B9.5	KSR1,KSR2	ENSG00000141068,ENSG00000171435
WBGene00002240	ksr-2	-0.399496	0.0196416	1520 - 1610	1693 - 2005	28.6933	30.63	F58D5.4	KSR1,KSR2	ENSG00000141068,ENSG00000171435
WBGene00002241	kup-1	-0.293038	0.0257547	3033 - 3506	3315 - 3518	106.153	105.513	F10C2.2
WBGene00002242	kvs-1	1.11218	0.0019602	70 - 84	24 - 38	1.70333	0.59	C53C9.3	KCNS2,KCNF1,KCNS1,KCNS3,KCNV1,KCNG1,KCNB1,KCNV2,KCNB2	ENSG00000156486,ENSG00000162975,ENSG00000124134,ENSG00000170745,ENSG00000164794,ENSG00000026559,ENSG00000158445,ENSG00000168263,ENSG00000182674
WBGene00002243	lad-2	1.50967	3.67849e-08	166 - 228	47 - 72	2.16	0.563333	Y54G2A.25	NRCAM,NFASC,L1CAM,CHL1	ENSG00000091129,ENSG00000163531,ENSG00000198910,ENSG00000134121
WBGene00002244	laf-1	0.363215	0.0181092	3880 - 4126	2117 - 3343	57.46	35.5467	Y71H2AM.19	DDX3X,DDX3Y,DDX4	ENSG00000215301,ENSG00000067048,ENSG00000152670
WBGene00002245	lag-1	-0.437978	0.00212361	2901 - 3015	3232 - 3781	46.33	50.9033	K08B4.1	RBPJ,RBPJL	ENSG00000168214,ENSG00000124232
WBGene00002246	lag-2	-0.298547	0.561368	21 - 36	25 - 43	0.886667	0.873333	Y73C8B.4
WBGene00002247	lam-1	0.908962	3.04374e-05	5976 - 6526	1880 - 4486	111.3	48.0367	W03F8.5	LAMB2,LAMB1,NTN4,LAMB4	ENSG00000172037,ENSG00000091136,ENSG00000074527,ENSG00000091128
WBGene00002248	lam-3	1.33905	4.63158e-09	2206 - 2690	492 - 1245	10.44	3.28667	T22A3.8	LAMA2,LAMA1,LAMA3,LAMA4,LAMA5,LAMC3,LAMC2,LAMC1	ENSG00000196569,ENSG00000101680,ENSG00000053747,ENSG00000112769,ENSG00000130702,ENSG00000050555,ENSG00000058085,ENSG00000135862
WBGene00002249	lap-1	-0.143433	0.39532	5330 - 5715	5123 - 5493	142.233	126.35	ZK353.6	NPEPL1	ENSG00000215440
WBGene00002250	lap-2	-0.415255	0.0114741	7725 - 8290	8456 - 9807	156.53	167.847	W07G4.4	LAP3	ENSG00000002549
WBGene00002251	lat-1	-0.522856	0.00037071	6435 - 6800	7430 - 9329	75.1767	87.09	B0457.1	ADGRL2,ADGRL3,ADGRL1,ADGRL4,ADGRD1,ADGRG6,ADGRE5,ADGRE2,ADGRE3,ADGRG4,ADGRG5,ADGRG2,ADGRE1,ADGRD2,ADGRG3,ADGRG1	ENSG00000117114,ENSG00000150471,ENSG00000072071,ENSG00000162618,ENSG00000111452,ENSG00000112414,ENSG00000123146,ENSG00000127507,ENSG00000131355,ENSG00000156920,ENSG00000159618,ENSG00000173698,ENSG00000174837,ENSG00000180264,ENSG00000182885,ENSG00000205336
WBGene00002252	lat-2	1.16607	0.000568398	91 - 95	24 - 46	1.23	0.413333	B0286.2	ADGRL1,ADGRL2,ADGRL3,ADGRD1,ADGRG6,ADGRE5,ADGRE2,ADGRE3,ADGRG4,ADGRG5,ADGRL4,ADGRG2,ADGRE1,ADGRD2,ADGRG3,ADGRG1	ENSG00000072071,ENSG00000117114,ENSG00000150471,ENSG00000111452,ENSG00000112414,ENSG00000123146,ENSG00000127507,ENSG00000131355,ENSG00000156920,ENSG00000159618,ENSG00000162618,ENSG00000173698,ENSG00000174837,ENSG00000180264,ENSG00000182885,ENSG00000205336
WBGene00002253	lbp-1	-0.301037	0.0262679	3404 - 4397	3575 - 4774	283.69	283.977	F40F4.3
WBGene00002254	lbp-2	-0.0605747	0.667342	11289 - 13166	9946 - 12451	959.64	812.353	F40F4.2
WBGene00002255	lbp-3	0.294246	0.0200457	2320 - 2769	1621 - 2032	107.953	70.5833	F40F4.4
WBGene00002256	lbp-4	-0.549964	0.000582875	1314 - 1501	1668 - 1858	105.033	124.57	ZK742.5
WBGene00002257	lbp-5	0.0260138	0.90216	638 - 673	526 - 573	64.96	51.2833	W02D3.7	FABP4,FABP3,PMP2,FABP7,FABP5,FABP12,FABP9,RBP2,RBP1,RBP5,CRABP2,RBP7,CRABP1	ENSG00000170323,ENSG00000121769,ENSG00000147588,ENSG00000164434,ENSG00000164687,ENSG00000197416,ENSG00000205186,ENSG00000114113,ENSG00000114115,ENSG00000139194,ENSG00000143320,ENSG00000162444,ENSG00000166426
WBGene00002258	lbp-6	0.87065	1.335e-06	4978 - 6384	2086 - 3600	483.52	214.953	W02D3.5	FABP3,PMP2,FABP7,FABP4,FABP9,FABP5,FABP12,RBP2,RBP1,RBP5,CRABP2,RBP7,CRABP1	ENSG00000121769,ENSG00000147588,ENSG00000164434,ENSG00000170323,ENSG00000205186,ENSG00000164687,ENSG00000197416,ENSG00000114113,ENSG00000114115,ENSG00000139194,ENSG00000143320,ENSG00000162444,ENSG00000166426
WBGene00002259	lbp-7	-0.478642	0.0344546	481 - 551	448 - 909	46.38	53.68	T22G5.2	FABP3,PMP2,FABP7,FABP4,FABP9,FABP5,FABP12,RBP2,RBP1,RBP5,CRABP2,RBP7,CRABP1	ENSG00000121769,ENSG00000147588,ENSG00000164434,ENSG00000170323,ENSG00000205186,ENSG00000164687,ENSG00000197416,ENSG00000114113,ENSG00000114115,ENSG00000139194,ENSG00000143320,ENSG00000162444,ENSG00000166426
WBGene00002260	lbp-8	-1.56118	0.00618604	1 - 4	9 - 32	0.176667	1.2	T22G5.6	FABP3,PMP2,FABP7,FABP4,FABP9,FABP5,FABP12,RBP2,RBP1,RBP5,CRABP2,RBP7,CRABP1	ENSG00000121769,ENSG00000147588,ENSG00000164434,ENSG00000170323,ENSG00000205186,ENSG00000164687,ENSG00000197416,ENSG00000114113,ENSG00000114115,ENSG00000139194,ENSG00000143320,ENSG00000162444,ENSG00000166426
WBGene00002261	ldb-1	0.56472	0.0070154	1258 - 1411	588 - 1165	22.1533	12.24	F58A3.1	LDB2,LDB1	ENSG00000169744,ENSG00000198728
WBGene00002262	ldh-1	0.524905	0.000452249	2291 - 2812	1390 - 1639	91.96	51.75	F13D12.2	LDHA,LDHB,LDHC,LDHAL6A,LDHAL6B,UEVLD	ENSG00000134333,ENSG00000111716,ENSG00000166796,ENSG00000166800,ENSG00000171989,ENSG00000151116
WBGene00002263	lea-1	-0.826796	3.7685e-09	8334 - 9041	10647 - 17322	129.397	208.42	K08H10.1	PLIN4	ENSG00000167676
WBGene00002264	lec-1	-0.266866	0.162564	7079 - 7873	6910 - 8574	317.233	306.023	W09H1.6	LGALS9,LGALS9B,LGALS9C,LGALS4,LGALS8,LGALS4,LGALSL,LGALS3,LGALS7B,LGALS7,GRIFIN	ENSG00000168961,ENSG00000170298,ENSG00000171916,ENSG00000171747,ENSG00000116977,ENSG00000282992,ENSG00000119862,ENSG00000131981,ENSG00000178934,ENSG00000205076,ENSG00000275572
WBGene00002265	lec-2	0.690892	1.0435e-10	3739 - 4085	1998 - 2283	107.583	55.56	F52H3.7	LGALS8,LGALS9,LGALS9B,LGALS9C,LGALSL,LGALS3,LGALS7B,LGALS7,GRIFIN,LGALS4,LGALS4,NEFH	ENSG00000116977,ENSG00000168961,ENSG00000170298,ENSG00000171916,ENSG00000119862,ENSG00000131981,ENSG00000178934,ENSG00000205076,ENSG00000275572,ENSG00000171747,ENSG00000282992,ENSG00000100285
WBGene00002266	lec-3	0.431198	0.0265478	546 - 658	373 - 387	18.5033	11.0733	ZK892.1	LGALS9,LGALS9B,LGALS9C,LGALS4,LGALS8,LGALS4,LGALSL,LGALS3,LGALS7B,LGALS7,GRIFIN	ENSG00000168961,ENSG00000170298,ENSG00000171916,ENSG00000171747,ENSG00000116977,ENSG00000282992,ENSG00000119862,ENSG00000131981,ENSG00000178934,ENSG00000205076,ENSG00000275572
WBGene00002267	lec-4	0.356635	0.0268969	1390 - 1691	924 - 1267	63.73	40.6067	C44F1.3	LGALS9,LGALS9B,LGALS9C,LGALS8,LGALS4,LGALS4,LGALSL,LGALS3,LGALS7B,LGALS7,GRIFIN	ENSG00000168961,ENSG00000170298,ENSG00000171916,ENSG00000116977,ENSG00000171747,ENSG00000282992,ENSG00000119862,ENSG00000131981,ENSG00000178934,ENSG00000205076,ENSG00000275572
WBGene00002268	lec-5	0.471828	2.74248e-05	6241 - 6751	3643 - 4901	274.263	160.02	ZK1248.16	LGALS9,LGALS9B,LGALS9C,LGALS8,LGALS4,LGALS4,LGALSL,LGALS3,LGALS7B,LGALS7,GRIFIN	ENSG00000168961,ENSG00000170298,ENSG00000171916,ENSG00000116977,ENSG00000171747,ENSG00000282992,ENSG00000119862,ENSG00000131981,ENSG00000178934,ENSG00000205076,ENSG00000275572
WBGene00002269	lec-6	-0.59951	3.05217e-08	8165 - 9144	10675 - 12720	748.037	919.723	Y55B1AR.1	LGALS7B,LGALS7,LGALS1,LGALS7B,LGALS7	ENSG00000178934,ENSG00000205076,ENSG00000100097,ENSG00000282902,ENSG00000283082
WBGene00002270	lec-7	0.161401	0.754657	33 - 37	20 - 33	2.12667	1.56667	R07B1.2	LGALS3	ENSG00000131981
WBGene00002271	lec-8	-0.403234	0.013773	5386 - 6526	6297 - 7706	242.363	258.073	R07B1.10	LGALS3	ENSG00000131981
WBGene00002272	lec-9	-0.409949	0.0010446	3454 - 3940	4031 - 4697	311.653	334.607	C16H3.2	LGALS3	ENSG00000131981
WBGene00002273	lec-10	-0.606496	6.28304e-06	3097 - 3672	4300 - 4608	201.247	247.923	W01A11.4	LGALS3	ENSG00000131981
WBGene00002274	lec-11	-0.0393671	0.880601	695 - 1179	737 - 883	46.7567	38.24	F38A5.3
WBGene00002275	lem-2	-0.305178	0.0101304	2895 - 2994	3039 - 3350	74.0767	73.51	W01G7.5	LEMD2,LEMD3	ENSG00000161904,ENSG00000174106
WBGene00002276	lem-3	-0.114714	0.332214	3056 - 3320	2732 - 3315	54.87	48.1533	F42H11.2	ANKLE1	ENSG00000160117
WBGene00002278	lep-2	-0.422893	0.0174846	960 - 1045	1082 - 1246	32.7267	35.86	Y55F3AM.6	MKRN2,MKRN1,MKRN3	ENSG00000075975,ENSG00000133606,ENSG00000179455
WBGene00002280	let-2	0.942026	4.22345e-08	12363 - 13542	4696 - 6891	88.2033	36.53	F01G12.5	COL4A5,COL4A2,COL4A3,COL4A1,COL4A6,COL11A1,COL5A3,COL4A4,COL1A1,COL5A1,COL2A1,COL1A2,COL3A1,COL24A1,COL27A1,COL11A2,COL5A2,COL19A1,COL16A1,COL22A1,COL7A1,COL11A2,COL11A2,COL11A2,COL11A2,COL11A2,COL11A2	ENSG00000188153,ENSG00000134871,ENSG00000169031,ENSG00000187498,ENSG00000197565,ENSG00000060718,ENSG00000080573,ENSG00000081052,ENSG00000108821,ENSG00000130635,ENSG00000139219,ENSG00000164692,ENSG00000168542,ENSG00000171502,ENSG00000196739,ENSG00000204248,ENSG00000204262,ENSG00000082293,ENSG00000084636,ENSG00000169436,ENSG00000114270,ENSG00000206290,ENSG00000223699,ENSG00000227801,ENSG00000230930…
WBGene00002282	let-4	1.74845	2.94249e-07	619 - 741	84 - 316	11.17	2.46	C44H4.2	CHAD,LRRC70,TRIL,GP1BA	ENSG00000136457,ENSG00000186105,ENSG00000255690,ENSG00000185245
WBGene00002295	let-19	0.47332	0.0377997	2165 - 2720	998 - 2168	10.34	6.09	K08F8.6	MED13,MED13L	ENSG00000108510,ENSG00000123066
WBGene00002297	ect-2	-0.336125	0.0102926	5121 - 5307	5471 - 5910	60.8733	62.3533	T19E10.1	ECT2	ENSG00000114346
WBGene00002299	let-23	0.347655	0.110702	453 - 589	299 - 417	5.00667	3.18	ZK1067.1	ERBB3,ERBB2,EGFR,ERBB4	ENSG00000065361,ENSG00000141736,ENSG00000146648,ENSG00000178568
WBGene00002324	let-49	-0.192163	0.267713	867 - 936	784 - 970	40.4367	37.1667	Y54E5B.3	MED7	ENSG00000155868
WBGene00002335	let-60	-0.226833	0.0848343	2143 - 2500	2265 - 2442	67.1067	63.9133	ZK792.6	KRAS,NRAS,HRAS,HRAS,ERAS,RRAS2	ENSG00000133703,ENSG00000213281,ENSG00000174775,ENSG00000276536,ENSG00000187682,ENSG00000133818
WBGene00002344	let-70	-0.379171	0.0120818	14615 - 16577	17100 - 18932	679.85	711.697	M7.1	UBE2D2,UBE2D3,UBE2D4,UBE2D1	ENSG00000131508,ENSG00000109332,ENSG00000078967,ENSG00000072401
WBGene00002348	myo-1	2.1169	9.57625e-05	447 - 760	17 - 117	3.90333	0.3	R06C7.10	MYH7B,MYH13,MYH7,MYH1,MYH3,MYH2,MYH8,MYH15,MYH6,MYH4,MYO5C,MYO5B,MYO5A,MYH9,MYH14,MYH10,MYH11	ENSG00000078814,ENSG00000006788,ENSG00000092054,ENSG00000109061,ENSG00000109063,ENSG00000125414,ENSG00000133020,ENSG00000144821,ENSG00000197616,ENSG00000264424,ENSG00000128833,ENSG00000167306,ENSG00000197535,ENSG00000100345,ENSG00000105357,ENSG00000133026,ENSG00000133392
WBGene00002363	let-92	-0.328821	0.00413761	8629 - 9086	9223 - 10172	206.253	210.213	F38H4.9	PPP2CA,PPP2CB	ENSG00000113575,ENSG00000104695
WBGene00002368	let-99	-0.627941	3.72248e-05	3633 - 3823	4762 - 5393	66.4167	83.34	K08E7.3
WBGene00002393	lpr-1	1.7555	1.04706e-06	77 - 110	18 - 22	5.5	1.06667	Y65B4BR.2
WBGene00002497	let-268	0.92433	1.06931e-08	682 - 797	293 - 435	12.6767	5.25667	F52H3.1	PLOD3,PLOD1,PLOD2	ENSG00000106397,ENSG00000083444,ENSG00000152952
WBGene00002583	let-363	0.0827551	0.673015	6054 - 6832	4235 - 6000	28.9333	22.1067	B0261.2	MTOR	ENSG00000198793
WBGene00002601	let-381	0.8786	0.028125	52 - 76	20 - 41	2.10333	0.853333	F26B1.7	FOXF2,FOXF1,FOXQ1,FOXH1	ENSG00000137273,ENSG00000103241,ENSG00000164379,ENSG00000160973
WBGene00002632	let-413	0.357849	0.0183181	1345 - 1513	801 - 1252	19.9867	12.6633	F26D11.11	SCRIB,LRRC1,LRRC7,ERBIN	ENSG00000180900,ENSG00000137269,ENSG00000033122,ENSG00000112851
WBGene00002637	let-418	0.356209	0.029565	9839 - 10946	5565 - 9385	73.6667	47.1033	F26F12.7	CHD4,CHD3,CHD5	ENSG00000111642,ENSG00000170004,ENSG00000116254
WBGene00002694	let-502	-0.0255156	0.891295	6808 - 7199	5174 - 6821	65.0733	53.5767	C10H11.9	ROCK2,ROCK1	ENSG00000134318,ENSG00000067900
WBGene00002696	let-504	-0.479976	0.00101703	3599 - 3872	4388 - 4685	93.9133	105.433	E01A2.4	NKAP,NKAPL	ENSG00000101882,ENSG00000189134
WBGene00002717	let-526	-0.0671631	0.742314	7278 - 8087	5426 - 7889	58.07	50.6833	C01G8.9	ARID1B,ARID1A	ENSG00000049618,ENSG00000117713
WBGene00002783	let-607	-0.318067	0.0163931	6090 - 6588	6342 - 7342	86.7433	87.5533	F57B10.1	CREB3L3,CREB3L4,CREB3,CREB3L1	ENSG00000060566,ENSG00000143578,ENSG00000107175,ENSG00000157613
WBGene00002804	let-630	-0.293732	0.106733	2615 - 2665	2520 - 3044	56.1267	55.8933	Y110A7A.19	PTCD3	ENSG00000132300
WBGene00002827	let-653	1.76853	8.2849e-11	775 - 904	124 - 349	13.8267	3.02	C29E6.1	MUC3A	ENSG00000169894
WBGene00002845	let-711	0.0169263	0.941953	18971 - 22241	13184 - 19971	92.43	74.33	F57B9.2	CNOT1	ENSG00000125107
WBGene00002850	let-716	0.058574	0.780355	6867 - 7536	4809 - 6881	51.6467	40.0367	C16A3.3	PDCD11	ENSG00000148843
WBGene00002855	let-721	-0.352288	0.00544588	5196 - 5765	5837 - 6077	111.35	113.963	C05D11.12	ETFDH	ENSG00000171503
WBGene00002879	let-754	-0.0808202	0.625513	3848 - 4244	3577 - 3811	163.41	139.613	C29E4.8	AK2,AK8	ENSG00000004455,ENSG00000165695
WBGene00002881	let-756	0.641535	0.000610642	322 - 401	175 - 224	8.22667	4.13333	C05D11.4	FGF1,FGF2,FGF10,FGF20,FGF14,FGF9,FGF12,FGF13,FGF5,FGF7,FGF3,FGF16	ENSG00000113578,ENSG00000138685,ENSG00000070193,ENSG00000078579,ENSG00000102466,ENSG00000102678,ENSG00000114279,ENSG00000129682,ENSG00000138675,ENSG00000140285,ENSG00000186895,ENSG00000196468
WBGene00002889	let-765	-0.0263702	0.90735	6100 - 7213	4470 - 7001	40.59	33.5767	F20H11.2	SBNO1,SBNO2,SBNO2	ENSG00000139697,ENSG00000064932,ENSG00000278788
WBGene00002891	let-767	0.159453	0.187249	5901 - 6479	4379 - 5524	251.747	182.093	C56G2.6	HSD17B12,HSDL1,HSD17B3	ENSG00000149084,ENSG00000103160,ENSG00000130948
WBGene00002915	let-805	0.926048	0.000159942	2775 - 3478	770 - 1736	18.9633	7.69	H19M22.2	FNDC3B,FNDC3A,TNXB,TNXB,TNXB,TNXB	ENSG00000075420,ENSG00000102531,ENSG00000168477,ENSG00000206258,ENSG00000231608,ENSG00000233323
WBGene00002957	let-858	-0.216196	0.194271	4477 - 4794	4296 - 5267	65.1133	61.1067	F33A8.1	CWC22	ENSG00000163510
WBGene00002974	lev-1	1.06527	0.000374614	119 - 155	45 - 73	3.05	1.09333	F09E8.7	CHRNA3,CHRNA4,CHRNE,CHRNB4,CHRNA2,CHRND,CHRNA1,CHRNB3,CHRNA6,CHRNB2,CHRNA5,CHRNB1,CHRNG	ENSG00000080644,ENSG00000101204,ENSG00000108556,ENSG00000117971,ENSG00000120903,ENSG00000135902,ENSG00000138435,ENSG00000147432,ENSG00000147434,ENSG00000160716,ENSG00000169684,ENSG00000170175,ENSG00000196811
WBGene00002975	lev-8	0.508582	0.278708	34 - 43	16 - 28	0.866667	0.443333	C35C5.5	CHRNA3,CHRNA4,CHRNE,CHRNB4,CHRNA2,CHRND,CHRNA1,CHRNB3,CHRNA6,CHRNB2,CHRNA5,CHRNB1,CHRNG	ENSG00000080644,ENSG00000101204,ENSG00000108556,ENSG00000117971,ENSG00000120903,ENSG00000135902,ENSG00000138435,ENSG00000147432,ENSG00000147434,ENSG00000160716,ENSG00000169684,ENSG00000170175,ENSG00000196811
WBGene00002976	lev-9	0.493269	0.356998	26 - 29	9 - 20	0.51	0.266667	T07H6.5	CSMD2,C4BPA,CSMD3,CSMD1,CR1L,SEZ6,SEZ6L,CR2,CD46,SVEP1,SEZ6L2,CR1,SELE,SELP	ENSG00000121904,ENSG00000123838,ENSG00000164796,ENSG00000183117,ENSG00000197721,ENSG00000063015,ENSG00000100095,ENSG00000117322,ENSG00000117335,ENSG00000165124,ENSG00000174938,ENSG00000203710,ENSG00000007908,ENSG00000174175
WBGene00002977	lev-10	0.692159	0.00234898	228 - 283	124 - 144	4.16333	2.07333	Y105E8A.7
WBGene00002978	lev-11	1.09049	1.27585e-19	13467 - 14874	5451 - 5894	387.94	143.757	Y105E8B.1	TPM1,TPM3,TPM4,TPM2	ENSG00000140416,ENSG00000143549,ENSG00000167460,ENSG00000198467
WBGene00002979	lfe-2	-0.0061078	0.974637	675 - 752	548 - 719	15.6633	12.7433	C46H11.4	ITPKC,ITPKA,ITPKB	ENSG00000086544,ENSG00000137825,ENSG00000143772
WBGene00002980	lgg-1	-0.442851	0.00143433	11522 - 15703	14375 - 16802	816.297	898.723	C32D5.9	GABARAP,GABARAPL1,GABARAPL2	ENSG00000170296,ENSG00000139112,ENSG00000238244,ENSG00000034713
WBGene00002981	lgg-2	-0.201788	0.140988	3589 - 4436	3415 - 4724	153.227	145.087	ZK593.6	MAP1LC3A,MAP1LC3B,MAP1LC3B2,MAP1LC3C	ENSG00000101460,ENSG00000140941,ENSG00000258102,ENSG00000197769
WBGene00002982	lgg-3	-0.799807	1.69902e-05	786 - 1047	1256 - 1529	99.54	140.903	B0336.8	ATG12	ENSG00000145782
WBGene00002983	lgx-1	1.00263	0.027761	56 - 92	13 - 53	0.526667	0.183333	C54G7.3
WBGene00002985	lig-1	-0.346973	0.00122565	5078 - 5668	5483 - 6373	89.5433	91.83	C29A12.3	LIG1,LIG3	ENSG00000105486,ENSG00000005156
WBGene00002986	lig-4	-0.304943	0.0561448	1018 - 1180	1151 - 1193	18.4067	18.43	C07H6.1	LIG4	ENSG00000174405
WBGene00002987	lim-4	1.41845	0.00522251	26 - 33	4 - 10	0.906667	0.23	ZC64.4	LHX6,LHX8	ENSG00000106852,ENSG00000162624
WBGene00002988	lim-6	-1.30234	1.79477e-05	43 - 72	121 - 130	1.96	4.37667	K03E6.1	LMX1B,LMX1A	ENSG00000136944,ENSG00000162761
WBGene00002989	lim-7	0.396153	0.067528	217 - 257	148 - 181	6.36333	3.93333	C04F1.3	ISL1,ISL2	ENSG00000016082,ENSG00000159556
WBGene00002990	lin-1	0.38293	0.101873	233 - 252	137 - 171	7.83	4.66667	C37F5.1	ELK4,ELK3,ELK1	ENSG00000158711,ENSG00000111145,ENSG00000126767
WBGene00002991	lin-2	0.485272	0.00915333	355 - 397	209 - 261	4.59667	2.69333	F17E5.1	CASK	ENSG00000147044
WBGene00002992	lin-3	-0.302992	0.0461587	1260 - 1360	1388 - 1428	29.6933	29.41	F36H1.4
WBGene00002994	lin-5	-0.265546	0.0432645	6637 - 6868	6593 - 7423	104.627	101.773	T09A5.10
WBGene00002996	lin-7	0.0529082	0.781694	719 - 739	539 - 660	42.74	33.6267	Y54G11A.10	LIN7B,LIN7C,LIN7A,PDZD11	ENSG00000104863,ENSG00000148943,ENSG00000111052,ENSG00000120509
WBGene00002997	lin-8	0.179157	0.426759	336 - 389	227 - 332	9.92333	7.09667	B0454.1
WBGene00002998	lin-9	-0.201103	0.0902121	2604 - 2973	2569 - 3271	49.3233	46.0467	ZK637.7	LIN9	ENSG00000183814
WBGene00002999	lin-10	0.72032	4.6361e-07	1245 - 1294	572 - 841	14.9467	7.44667	C09H6.2	APBA2,APBA1,APBA3,APBA2	ENSG00000034053,ENSG00000107282,ENSG00000011132,ENSG00000276495
WBGene00003000	lin-11	0.51949	0.0944647	99 - 146	57 - 78	3.04667	1.69333	ZC247.3	LHX5,LHX1,LHX1,LHX3,LHX4	ENSG00000089116,ENSG00000273706,ENSG00000274577,ENSG00000107187,ENSG00000121454
WBGene00003001	lin-12	0.112588	0.659025	420 - 441	267 - 491	3.53333	2.65	R107.8	NOTCH3,NOTCH2,NOTCH1,NOTCH4,NOTCH4,NOTCH4,EYS,NOTCH4,NOTCH4,NOTCH4,NOTCH4,JAG1,DLL4,CRB1,CRB2,JAG2,DLL1,SNED1,FBN2,FBN3,FBN1	ENSG00000074181,ENSG00000134250,ENSG00000148400,ENSG00000204301,ENSG00000223355,ENSG00000234876,ENSG00000188107,ENSG00000238196,ENSG00000206312,ENSG00000232339,ENSG00000235396,ENSG00000101384,ENSG00000128917,ENSG00000134376,ENSG00000148204,ENSG00000184916,ENSG00000198719,ENSG00000162804,ENSG00000138829,ENSG00000142449,ENSG00000166147
WBGene00003002	lin-13	0.0625688	0.662734	7489 - 8407	5826 - 7782	42.85	33.22	C03B8.4	ZNF423,ZNF473,ZNF521	ENSG00000102935,ENSG00000142528,ENSG00000198795
WBGene00003003	lin-14	0.801519	0.00143104	374 - 509	151 - 280	10.0267	4.57333	T25C12.1
WBGene00003006	lin-17	1.16526	6.02315e-07	251 - 321	84 - 143	6.20667	2.14667	Y71F9B.5	FZD3,SMO,FZD6	ENSG00000104290,ENSG00000128602,ENSG00000164930
WBGene00003007	lin-18	0.17393	0.432859	325 - 333	208 - 326	6.91	5	C16B8.1	RYK	ENSG00000163785
WBGene00003008	lin-22	0.929104	0.0582522	27 - 43	12 - 14	2.54333	0.896667	Y54G2A.1	HES1,HES4	ENSG00000114315,ENSG00000188290
WBGene00003009	lin-23	-0.332327	0.011075	4599 - 4842	4751 - 5462	69.12	70.5933	K10B2.1	FBXW11,BTRC	ENSG00000072803,ENSG00000166167
WBGene00003010	lin-24	-0.635088	5.08773e-05	2155 - 2607	3011 - 3388	97.41	123.117	B0001.1
WBGene00003011	lin-25	0.394757	0.063262	624 - 790	348 - 651	7.66333	4.78	F56H9.5
WBGene00003012	lin-26	-0.289977	0.0398849	3131 - 3174	3296 - 3384	67.9533	66.77	F18A1.2
WBGene00003014	lin-28	-0.354602	0.011452	2066 - 2347	2401 - 2420	81.36	82.9733	F02E9.2	LIN28B,LIN28A	ENSG00000187772,ENSG00000131914
WBGene00003015	lin-29	1.0824	0.00012643	147 - 197	60 - 94	3.46333	1.3	W03C9.4	ZNF384,ZNF362,ZNF581,ZNF524,ZNF580	ENSG00000126746,ENSG00000160094,ENSG00000171425,ENSG00000171443,ENSG00000213015
WBGene00003017	lin-31	0.422392	0.432245	23 - 27	13 - 16	0.78	0.443333	K10G6.1	FOXB1,FOXB2	ENSG00000171956,ENSG00000204612
WBGene00003018	lin-32	-0.589339	0.129594	32 - 51	47 - 73	3.48	4.30667	T14F9.5	ATOH1,TWIST1,TWIST2,ATOH7	ENSG00000172238,ENSG00000122691,ENSG00000233608,ENSG00000179774
WBGene00003019	lin-33	0.551994	0.00192324	606 - 802	351 - 537	33.29	18.49	H32C10.2
WBGene00003020	lin-35	-0.258671	0.0321317	3470 - 4050	3399 - 4486	46.4433	45.3933	C32F10.2	RBL1,RBL2,RB1	ENSG00000080839,ENSG00000103479,ENSG00000139687
WBGene00003021	lin-36	-0.288541	0.0398813	5408 - 5541	5002 - 6313	64.0767	63.6533	F44B9.6
WBGene00003022	lin-37	-0.565362	0.000105398	1960 - 2476	2781 - 2868	94.8467	113.15	ZK418.4
WBGene00003024	lin-39	0.473001	0.0256598	258 - 325	151 - 218	9.35667	5.45333	C07H6.7	HOXA5,HOXB5,HOXD4,HOXA4,HOXC4,HOXC5,HOXC6,HOXB4,HOXA6,HOXB6,HOXA7,HOXB7	ENSG00000106004,ENSG00000120075,ENSG00000170166,ENSG00000197576,ENSG00000198353,ENSG00000172789,ENSG00000197757,ENSG00000182742,ENSG00000106006,ENSG00000108511,ENSG00000122592,ENSG00000260027
WBGene00003025	lin-40	-0.0863004	0.629913	3300 - 3826	3075 - 3402	46.4767	39.8	T27C4.4	MTA3,MTA2,MTA1	ENSG00000057935,ENSG00000149480,ENSG00000182979
WBGene00003026	lin-41	-0.0339803	0.861651	10770 - 11938	8067 - 11087	96.14	79.96	C12C8.3	TRIM71	ENSG00000206557
WBGene00003029	lin-44	1.1629	0.0013531	73 - 87	22 - 33	2.40667	0.75	E01A2.3	WNT11,WNT9A,WNT9B	ENSG00000085741,ENSG00000143816,ENSG00000158955
WBGene00003030	lin-45	-0.381383	0.00250961	3173 - 3495	3404 - 4164	45.2033	47.1167	Y73B6A.5	BRAF,ARAF,RAF1	ENSG00000157764,ENSG00000078061,ENSG00000132155
WBGene00003031	lin-46	1.14107	0.0137416	45 - 81	9 - 35	1.86333	0.56	R186.4	GPHN	ENSG00000171723
WBGene00003033	lin-48	0.127955	0.808338	35 - 48	21 - 36	1.71667	1.11667	F34D10.5	OVOL2,OVOL1,OVOL3	ENSG00000125850,ENSG00000172818,ENSG00000105261
WBGene00003034	lin-49	-0.457247	0.000924263	3031 - 3340	3445 - 4160	34.59	38.56	F42A9.2	BRPF3,BRD1,BRPF1	ENSG00000096070,ENSG00000100425,ENSG00000156983
WBGene00003035	lin-52	-0.65542	2.53839e-06	1234 - 1428	1743 - 1841	104.33	133.077	ZK632.13	LIN52	ENSG00000205659
WBGene00003036	lin-53	-0.30721	0.00915075	8609 - 9587	9584 - 10295	260.2	260.373	K07A1.12	RBBP4,RBBP7	ENSG00000162521,ENSG00000102054
WBGene00003037	lin-54	-0.618777	5.45015e-07	2998 - 3344	4187 - 4336	85.0267	105.69	JC8.6	LIN54,TESMIN	ENSG00000189308,ENSG00000132749
WBGene00003038	lin-56	-0.125375	0.467578	569 - 693	534 - 705	22.5967	19.9533	ZK673.3
WBGene00003040	lin-59	0.243759	0.168221	2111 - 2242	1216 - 2038	18.5733	12.84	T12F5.4	ASH1L,SETBP1	ENSG00000116539,ENSG00000152217
WBGene00003041	lin-61	-0.417768	0.000204011	2448 - 2890	2854 - 3363	64.1433	69.85	R06C7.7	L3MBTL2,SFMBT2,MBTD1,SFMBT1,L3MBTL4,L3MBTL1	ENSG00000100395,ENSG00000198879,ENSG00000011258,ENSG00000163935,ENSG00000154655,ENSG00000185513
WBGene00003043	lip-1	-0.352782	0.00797466	2259 - 2526	2576 - 2722	51.8033	53.3367	C05B10.1	DUSP7,DUSP9,DUSP6	ENSG00000164086,ENSG00000130829,ENSG00000139318
WBGene00003044	lir-1	-0.593288	0.000460167	2222 - 2767	2916 - 3365	108.463	131.7	F18A1.3
WBGene00003045	lir-2	-0.14618	0.342894	787 - 927	762 - 909	20.0833	17.9067	F18A1.4
WBGene00003046	lir-3	0.23838	0.455038	103 - 116	66 - 94	5.01	3.34333	F37H8.1
WBGene00003047	lis-1	-0.222595	0.179799	2739 - 2959	2752 - 2979	63.8367	60.1967	T03F6.5	PAFAH1B1	ENSG00000007168
WBGene00003048	lit-1	-0.266034	0.0640373	2101 - 2215	2158 - 2315	35.8367	35.09	W06F12.1	NLK	ENSG00000087095
WBGene00003052	lmn-1	-0.11467	0.294641	10472 - 11150	9301 - 11627	202.78	178.42	DY3.2	LMNB1,LMNA,LMNB2,LMNTD1	ENSG00000113368,ENSG00000160789,ENSG00000176619,ENSG00000152936
WBGene00003053	lmp-1	-0.0362757	0.876286	4636 - 5272	3470 - 6321	201.667	170.537	C03B1.12
WBGene00003055	lon-1	0.188569	0.286224	1061 - 1170	810 - 879	38.5433	27.3	F48E8.1	R3HDML,CRISPLD2,CRISPLD1,PI15,GLIPR1,PI16,GLIPR1L1,CRISP3,CRISP2,CRISP1,CLEC18B,CLEC18A,CLEC18C,GLIPR1L2	ENSG00000101074,ENSG00000103196,ENSG00000121005,ENSG00000137558,ENSG00000139278,ENSG00000164530,ENSG00000173401,ENSG00000096006,ENSG00000124490,ENSG00000124812,ENSG00000140839,ENSG00000157322,ENSG00000157335,ENSG00000180481
WBGene00003056	lon-2	-0.176789	0.273628	704 - 761	614 - 894	15.1467	14.0367	C39E6.1
WBGene00003057	lon-3	1.90782	0.00055758	312 - 856	21 - 122	22.0533	1.91667	ZK836.1	COLQ	ENSG00000206561
WBGene00003058	lov-1	0.00331105	0.996286	8 - 15	8 - 10	0.04	0.0266667	ZK945.9	PKDREJ,PKD1,PKD1L1,PKD1L3,PKD1L2	ENSG00000130943,ENSG00000008710,ENSG00000158683,ENSG00000277481,ENSG00000166473
WBGene00003059	lpd-2	-0.579987	0.00057041	1242 - 1523	1626 - 1817	52.21	63.0333	C48E7.3	NGDN	ENSG00000129460
WBGene00003060	lpd-3	0.19769	0.226489	2201 - 2405	1636 - 1856	17.1867	12.1	Y47G6A.23	KIAA1109	ENSG00000138688
WBGene00003061	lpd-5	-0.511235	0.00420022	2659 - 3075	3257 - 4042	211.41	242.697	ZK973.10	NDUFS4	ENSG00000164258
WBGene00003062	lpd-6	-0.260844	0.109194	4269 - 4692	4448 - 4958	98.4433	95.1433	K09H9.6	PPAN,PPAN-P2RY11,P2RY11	ENSG00000130810,ENSG00000243207,ENSG00000244165
WBGene00003063	lpd-7	-0.413755	0.0361225	9517 - 10953	9667 - 12777	240.04	257.343	R13A5.12	PES1	ENSG00000100029
WBGene00003064	lpd-8	-0.490768	0.00215511	2145 - 2485	2589 - 2900	123.723	140.64	R10H10.1	NFU1	ENSG00000169599
WBGene00003065	lpd-9	-0.367361	0.0655473	1807 - 2114	1993 - 2574	174.05	183.027	T21C9.5
WBGene00003066	lpl-1	-0.108244	0.504855	1916 - 2167	1674 - 1989	66.72	58.29	ZC410.7	MRPL42	ENSG00000198015
WBGene00003067	lrg-1	-1.00457	0.000223703	964 - 982	1085 - 2084	21.0867	34.76	F55H2.4
WBGene00003068	lrk-1	0.46149	0.0107205	1278 - 1455	647 - 1118	7.23	4.28	T27C10.6	LRRK1,LRRK2	ENSG00000154237,ENSG00000188906
WBGene00003071	lrp-1	1.25453	7.0862e-12	3252 - 3762	872 - 1740	9.27	3.13	F29D11.1	LRP2,LRP1,LRP1B,LRP6,LRP4,LRP5	ENSG00000081479,ENSG00000123384,ENSG00000168702,ENSG00000070018,ENSG00000134569,ENSG00000162337
WBGene00003072	lrp-2	0.590851	0.0199689	1847 - 2419	697 - 1591	5.59667	3.00667	T21E3.3	LRP1,LRP1B,LRP2,LRP6,LRP4,LRP5	ENSG00000123384,ENSG00000168702,ENSG00000081479,ENSG00000070018,ENSG00000134569,ENSG00000162337
WBGene00003073	lars-1	0.0216877	0.889231	11647 - 12069	8989 - 10811	124.87	99.8367	R74.1	LARS	ENSG00000133706
WBGene00003074	lars-2	-0.388346	0.0272796	1560 - 1719	1746 - 2092	25.7433	27.83	ZK524.3	LARS2	ENSG00000011376
WBGene00003075	lrx-1	0.636694	0.0718813	71 - 76	34 - 52	2.23667	1.00333	T04H1.6	LRP3,LRP12,LDLRAD3,LRP10	ENSG00000130881,ENSG00000147650,ENSG00000179241,ENSG00000197324
WBGene00003076	lsm-1	-0.80894	5.82628e-08	1484 - 1834	2439 - 2647	137.073	194.19	F40F8.9	LSM1	ENSG00000175324
WBGene00003077	lsm-3	-0.564311	0.000648651	1072 - 1284	1345 - 1642	136.667	163.753	Y62E10A.12	LSM3	ENSG00000170860
WBGene00003078	lsm-4	-0.493569	0.00043523	1290 - 1569	1732 - 1799	105.903	120.15	F32A5.7	LSM4	ENSG00000130520
WBGene00003079	lsm-5	-0.463999	0.00307247	1097 - 1295	1341 - 1558	135.48	152.31	F28F8.3	LSM5	ENSG00000106355
WBGene00003080	lsm-6	-0.524916	0.00505781	742 - 873	935 - 1139	120.16	140.71	Y71G12B.14	LSM6	ENSG00000164167
WBGene00003081	lsm-7	-0.733844	2.5549e-05	1471 - 1837	2155 - 2600	178.843	239.433	ZK593.7	LSM7	ENSG00000130332
WBGene00003082	lsm-8	-0.581722	0.000393382	1240 - 1708	1794 - 1961	111.457	135.89	Y73B6BL.32	LSM8	ENSG00000128534
WBGene00003083	lst-1	-0.259246	0.074395	2514 - 2878	2813 - 2870	82.5367	80.5633	T22A3.3
WBGene00003084	lst-2	0.280996	0.0446947	878 - 945	605 - 767	13.6667	9.09667	R160.7	ZFYVE28	ENSG00000159733
WBGene00003086	lst-4	-0.54525	0.00111437	4157 - 4448	4942 - 5914	85.8133	102.35	Y37A1B.2	SNX33,SNX18,SNX9	ENSG00000173548,ENSG00000178996,ENSG00000130340
WBGene00003087	lsy-2	0.170824	0.356969	671 - 737	468 - 690	16.3967	11.6633	F49H12.1	ZFP57	ENSG00000204644
WBGene00003089	ltd-1	1.23448	2.4367e-07	456 - 486	109 - 252	7.25333	2.42667	K02C4.4	KY	ENSG00000174611
WBGene00003090	lys-1	-0.632564	2.6065e-09	10149 - 12225	13348 - 17626	451.563	570.173	Y22F5A.4
WBGene00003091	lys-2	-1.19641	3.56375e-14	4772 - 7138	9632 - 14139	263.623	501.343	Y22F5A.5
WBGene00003092	lys-3	0.212326	0.519213	279 - 373	166 - 267	12.8133	8.77	Y22F5A.6
WBGene00003093	lys-4	-1.23353	3.59139e-09	181 - 239	391 - 488	13.2867	25.8833	F58B3.1
WBGene00003095	lys-6	-1.29018	0.00429806	9 - 17	35 - 39	1.68333	3.88333	F58B3.3
WBGene00003096	lys-7	-0.0084785	0.986806	12471 - 15112	7584 - 21698	635.33	541.883	C02A12.4
WBGene00003097	lys-8	-1.71178	1.1843e-50	3950 - 4638	11085 - 14067	189.987	512.587	C17G10.5
WBGene00003099	lys-10	0.378117	0.573889	4 - 8	2 - 5	0.38	0.156667	F17E9.11
WBGene00003100	mab-3	-0.17061	0.794076	8 - 22	11 - 25	0.566667	0.536667	Y53C12B.5	DMRT1,DMRTB1	ENSG00000137090,ENSG00000143006
WBGene00003102	mab-5	0.576874	0.126881	57 - 83	33 - 41	2.59	1.33333	C08C3.3	HOXA5,HOXB5,HOXD4,HOXA4,HOXC4,HOXA7,HOXB7,HOXB4,HOXA3,HOXB3,HOXD3,PDX1,GSX1,GSX2,HOXA6,HOXB6,HOXC5,HOXC6,HOXC8,HOXB8	ENSG00000106004,ENSG00000120075,ENSG00000170166,ENSG00000197576,ENSG00000198353,ENSG00000122592,ENSG00000260027,ENSG00000182742,ENSG00000105997,ENSG00000120093,ENSG00000128652,ENSG00000139515,ENSG00000169840,ENSG00000180613,ENSG00000106006,ENSG00000108511,ENSG00000172789,ENSG00000197757,ENSG00000037965,ENSG00000120068
WBGene00003104	mab-7	2.18949	2.71171e-08	125 - 200	9 - 43	5.4	0.736667	ZC13.4
WBGene00003106	mab-9	0.95448	0.0401624	29 - 46	13 - 17	1.19333	0.41	T27A1.6	TBX20,TBX18,TBX15	ENSG00000164532,ENSG00000112837,ENSG00000092607
WBGene00003107	mab-10	0.468933	0.0603071	194 - 224	99 - 167	4.36333	2.58667	R166.1	NAB1,NAB2	ENSG00000138386,ENSG00000166886
WBGene00003111	mab-20	0.440274	0.0267406	985 - 1131	549 - 959	19.2067	11.55	Y71G12B.20	SEMA5B,SEMA5A,SEMA7A	ENSG00000082684,ENSG00000112902,ENSG00000138623
WBGene00003112	mab-21	1.07664	0.00419252	134 - 143	26 - 94	4.57	1.66667	F35G12.6	MAB21L1,MAB21L2,MAB21L3	ENSG00000180660,ENSG00000181541,ENSG00000173212
WBGene00003114	mab-23	0.410831	0.52923	4 - 7	1 - 5	0.443333	0.19	C32C4.5
WBGene00003119	mac-1	-0.26263	0.213586	1683 - 1972	1654 - 2071	25.6933	24.7933	Y48C3A.7	NVL	ENSG00000143748
WBGene00003123	mag-1	-0.365913	0.00225568	4188 - 5027	4640 - 5624	231.96	243.24	R09B3.5	MAGOHB,MAGOH	ENSG00000111196,ENSG00000162385
WBGene00003124	mai-1	-0.00924308	0.975369	185 - 228	176 - 184	11.7867	10.8433	K10B3.9	ATPIF1	ENSG00000130770
WBGene00003129	map-1	-0.139313	0.481747	1220 - 1431	1167 - 1368	58.11	55.7933	Y37E11AL.7	METAP1,METAP1D	ENSG00000164024,ENSG00000172878
WBGene00003130	map-2	-0.0268646	0.897342	3925 - 4482	3501 - 3779	102.68	83.7767	Y116A8A.9	METAP2	ENSG00000111142
WBGene00003132	mat-1	-0.314369	0.0130454	5735 - 5938	5919 - 6587	87.3767	87.3467	Y110A7A.17	CDC27,ANAPC7	ENSG00000004897,ENSG00000196510
WBGene00003133	mat-2	0.232099	0.0885137	4490 - 4891	3143 - 3823	40.8	27.91	W10C6.1	ANAPC1	ENSG00000153107
WBGene00003134	mat-3	-0.0144709	0.934597	2021 - 2223	1680 - 2052	40.2667	33.0333	F10C5.1	CDC23	ENSG00000094880
WBGene00003136	mau-2	-0.204123	0.195304	1521 - 2113	1637 - 2039	35.33	32.92	C09H6.3	MAU2	ENSG00000129933
WBGene00003142	mau-8	-0.468055	0.00834257	1090 - 1377	1358 - 1559	53.1933	58.9933	Y62E10A.8	PDCL,PDC	ENSG00000136940,ENSG00000116703
WBGene00003143	max-1	0.504343	0.00484554	633 - 807	357 - 572	8.25333	4.65	C34B4.1	PLEKHH1,PLEKHH2,PLEKHH3	ENSG00000054690,ENSG00000152527,ENSG00000068137
WBGene00003144	max-2	-0.449079	0.00565921	5910 - 6414	6608 - 8330	84.6667	90.6467	Y38F1A.10	PAK3,PAK1,PAK2	ENSG00000077264,ENSG00000149269,ENSG00000180370
WBGene00003148	mbf-1	-0.148949	0.331148	4047 - 4785	4012 - 4411	247.37	221.03	H21P03.1	EDF1	ENSG00000107223
WBGene00003149	mbk-1	0.417256	0.00915559	1069 - 1237	623 - 902	16.3	9.93333	T04C10.1	DYRK1B,DYRK1A,DYRK1B	ENSG00000105204,ENSG00000157540,ENSG00000281320
WBGene00003150	mbk-2	-0.400565	0.00110277	11241 - 11535	12068 - 13718	190.963	206.297	F49E11.1	DYRK2,DYRK3,DYRK4	ENSG00000127334,ENSG00000143479,ENSG00000010219
WBGene00003151	mca-1	0.440556	0.00986577	4515 - 5012	2320 - 4058	43.4233	26.0533	W09C2.3	ATP2B4,ATP2B3,ATP2B1,ATP2B2	ENSG00000058668,ENSG00000067842,ENSG00000070961,ENSG00000157087
WBGene00003153	mca-3	0.238973	0.135766	7589 - 8441	4731 - 6674	77.88	53.67	Y67D8C.10	ATP2B3,ATP2B4,ATP2B1,ATP2B2	ENSG00000067842,ENSG00000058668,ENSG00000070961,ENSG00000157087
WBGene00003154	mcm-2	-0.278286	0.0381458	8013 - 8824	8335 - 9213	134.68	134.99	Y17G7B.5	MCM2	ENSG00000073111
WBGene00003155	mcm-3	-0.292878	0.0218782	9336 - 9682	9900 - 10423	141.247	139.88	C25D7.6	MCM3	ENSG00000112118
WBGene00003156	mcm-4	0.0255063	0.879303	7240 - 7875	6180 - 6748	175.32	149.823	Y39G10AR.14	MCM4	ENSG00000104738
WBGene00003157	mcm-5	-0.120959	0.288511	10838 - 11093	9268 - 12158	181.873	160.887	R10E4.4	MCM5	ENSG00000100297
WBGene00003158	mcm-6	-0.369268	0.000484674	9477 - 10094	10379 - 11669	166.917	177.407	ZK632.1	MCM6	ENSG00000076003
WBGene00003159	mcm-7	-0.156108	0.259291	12921 - 14301	11393 - 16009	221.443	201.687	F32D1.10	MCM7	ENSG00000166508
WBGene00003160	mdf-1	-0.119584	0.318595	4200 - 4884	3853 - 4741	81.29	71.6967	C50F4.11	MAD1L1	ENSG00000002822
WBGene00003161	mdf-2	-0.300254	0.0371325	2131 - 2570	2346 - 2598	134.27	134.073	Y69A2AR.30	MAD2L1	ENSG00000164109
WBGene00003162	mdh-2	0.056414	0.766355	12040 - 14355	10632 - 11078	332.337	257.377	F20H11.3	MDH2	ENSG00000146701
WBGene00003163	mdl-1	0.0638932	0.736446	989 - 1183	757 - 1152	37.84	29.7433	R03E9.1	MXI1,MXD1,MXD4,MXD3	ENSG00000119950,ENSG00000059728,ENSG00000123933,ENSG00000213347
WBGene00003164	mdt-6	-0.469704	0.00144761	2077 - 2408	2592 - 2807	111.863	125.52	Y57E12AL.5	MED6	ENSG00000133997
WBGene00003165	mec-1	1.71908	2.26118e-12	261 - 327	58 - 103	3.14	0.566667	T07H8.4	TFPI,AMBP,WFIKKN1,WFIKKN2,TFPI2	ENSG00000003436,ENSG00000106927,ENSG00000127578,ENSG00000173714,ENSG00000105825
WBGene00003166	mec-2	1.29813	1.39837e-05	117 - 157	38 - 52	3.22	0.96	F14D12.4	STOML3,STOM,NPHS2,STOML2	ENSG00000133115,ENSG00000148175,ENSG00000116218,ENSG00000165283
WBGene00003167	mec-3	-1.12132	0.00176214	32 - 39	51 - 97	1.33667	2.52333	F01D4.6
WBGene00003168	mec-4	1.39945	0.000597427	52 - 62	14 - 17	0.91	0.226667	T01C8.7	SCNN1G,SCNN1A,SCNN1D,SCNN1B	ENSG00000166828,ENSG00000111319,ENSG00000162572,ENSG00000168447
WBGene00003169	mec-5	1.06372	2.76935e-07	279 - 324	107 - 151	10.81	4.2	E03G2.3	COL9A2,COL23A1,COL19A1,COL16A1,COL9A3,COL9A1,COL21A1,COL22A1,COL25A1,COL13A1	ENSG00000049089,ENSG00000050767,ENSG00000082293,ENSG00000084636,ENSG00000092758,ENSG00000112280,ENSG00000124749,ENSG00000169436,ENSG00000188517,ENSG00000197467
WBGene00003170	mec-6	1.0494	0.0127087	57 - 66	11 - 29	1.59667	0.513333	W02D3.3	PON1,PON3,PON2	ENSG00000005421,ENSG00000105852,ENSG00000105854
WBGene00003171	mec-7	1.78243	5.47536e-26	967 - 1243	243 - 332	29.1767	6.72	ZK154.3	TUBB2B,TUBB6,TUBB4B,TUBB2A,TUBB3,TUBB,TUBB4A,TUBB,TUBB,TUBB,TUBB,TUBB,TUBB,TUBB,TUBB1	ENSG00000137285,ENSG00000198211,ENSG00000176014,ENSG00000188229,ENSG00000137267,ENSG00000258947,ENSG00000196230,ENSG00000104833,ENSG00000183311,ENSG00000224156,ENSG00000227739,ENSG00000229684,ENSG00000232421,ENSG00000232575,ENSG00000235067,ENSG00000101162,ENSG00000127589,ENSG00000159247,ENSG00000173213,ENSG00000173876
WBGene00003172	mec-8	0.260173	0.139491	926 - 991	590 - 907	24.9267	17.31	F46A9.6	RBPMS,RBPMS2	ENSG00000157110,ENSG00000166831
WBGene00003173	mec-9	1.57165	7.10059e-07	114 - 132	25 - 48	1.94333	0.573333	C50H2.3	TFPI,WFIKKN1,WFIKKN2,SPINT3,TFPI2	ENSG00000003436,ENSG00000127578,ENSG00000173714,ENSG00000101446,ENSG00000105825
WBGene00003174	mec-10	0.958117	0.0219308	43 - 58	17 - 24	0.85	0.316667	F16F9.5	SCNN1G,SCNN1A,SCNN1D,SCNN1B	ENSG00000166828,ENSG00000111319,ENSG00000162572,ENSG00000168447
WBGene00003175	mec-12	1.92429	2.58694e-22	894 - 1277	223 - 253	27.88	5.69	C44B11.3	TUBA1B,TUBA1A,TUBA1C,TUBA4A,TUBA3D,TUBA3E,TUBA3C,TUBA4B,TUBAL3,TUBA8	ENSG00000123416,ENSG00000167552,ENSG00000167553,ENSG00000127824,ENSG00000075886,ENSG00000152086,ENSG00000198033,ENSG00000243910,ENSG00000178462,ENSG00000183785,ENSG00000214391
WBGene00003176	mec-14	0.440013	0.502845	7 - 18	4 - 7	0.29	0.12	F37C12.12
WBGene00003177	mec-15	-0.395725	0.00107954	2405 - 2759	2739 - 3107	76.4767	81.2	T01E8.4	FBXW9	ENSG00000132004
WBGene00003178	mec-17	1.69503	4.63267e-17	581 - 779	146 - 226	29.62	7.21	F57H12.7	ATAT1,ATAT1,ATAT1,ATAT1,ATAT1,ATAT1,ATAT1	ENSG00000137343,ENSG00000206488,ENSG00000223752,ENSG00000229061,ENSG00000231257,ENSG00000234549,ENSG00000235658
WBGene00003179	mec-18	1.42886	2.94674e-06	140 - 205	36 - 60	3.21667	0.87	C52B9.9
WBGene00003182	mef-2	0.345163	0.17562	237 - 306	144 - 259	9.34667	5.95	W10D5.1	MEF2A,MEF2C,MEF2D,BORCS8-MEF2B,MEF2B	ENSG00000068305,ENSG00000081189,ENSG00000116604,ENSG00000064489,ENSG00000213999
WBGene00003183	mei-1	-0.488302	0.00164764	3514 - 3754	4192 - 4586	92.61	104.863	T01G9.5	KATNA1,KATNAL1	ENSG00000186625,ENSG00000102781
WBGene00003184	mei-2	-0.793498	3.05594e-07	3125 - 3861	4897 - 5510	144.273	201.003	F57B10.12
WBGene00003185	mek-1	-0.157357	0.207214	2217 - 2407	2117 - 2563	74.6767	66.98	K08A8.1	MAP2K7	ENSG00000076984
WBGene00003186	mek-2	-0.231467	0.155176	1855 - 2011	1926 - 2101	45.1167	42.71	Y54E10BL.6	MAP2K1,MAP2K2	ENSG00000169032,ENSG00000126934,ENSG00000230626
WBGene00003196	mel-11	-0.490868	0.00307306	5027 - 5324	5701 - 7222	58.02	66.02	C06C3.1	PPP1R12A,PPP1R12B,PPP1R12C	ENSG00000058272,ENSG00000077157,ENSG00000125503
WBGene00003209	mel-26	-0.673745	3.67849e-08	4532 - 5878	6649 - 7817	123.22	159.183	ZK858.4	SPOP,KBTBD4,SPOPL	ENSG00000121067,ENSG00000123444,ENSG00000144228
WBGene00003210	mel-28	-0.00701309	0.972752	9464 - 10409	7071 - 9740	70.9133	58.0733	C38D4.3	AHCTF1	ENSG00000153207
WBGene00003214	mel-32	-0.182927	0.160536	10482 - 11462	10567 - 11374	285.167	262.693	C05D11.11	SHMT1,SHMT2	ENSG00000176974,ENSG00000182199
WBGene00003216	memi-1	-0.772598	8.46576e-08	1618 - 1830	2466 - 2683	55.2733	76.42	Y17G9B.9
WBGene00003218	mep-1	-0.294294	0.0220741	7127 - 7423	6722 - 8526	95.0533	94.72	M04B2.1	ZFAT,ZFX,ZFY,ZNF711	ENSG00000066827,ENSG00000005889,ENSG00000067646,ENSG00000147180
WBGene00003219	mes-1	-0.185544	0.303425	645 - 686	520 - 790	7.71667	7.11333	F54F7.5
WBGene00003220	mes-2	-0.155191	0.408605	2305 - 2391	2103 - 2479	37.3067	33.3533	R06A4.7	EZH2,EZH1	ENSG00000106462,ENSG00000108799
WBGene00003221	mes-3	-0.00364484	0.982955	2517 - 2758	1916 - 2751	44.1733	36.0967	F54C1.3
WBGene00003222	mes-4	-0.162791	0.1822	3571 - 3731	3187 - 4011	46.8433	42.3767	Y2H9A.1	SETBP1,NSD2,NSD3,NSD1	ENSG00000152217,ENSG00000109685,ENSG00000147548,ENSG00000165671
WBGene00003224	mes-6	-0.211754	0.0899008	1715 - 1784	1579 - 1984	47.0333	44.4767	C09G4.5	EED	ENSG00000074266
WBGene00003225	mev-1	-0.215991	0.274659	2651 - 3283	2734 - 3171	172.6	160.94	T07C4.7	SDHC	ENSG00000143252
WBGene00003228	mex-1	-0.471738	0.00504274	8626 - 9062	9607 - 11279	203.86	227.453	W03C9.7
WBGene00003229	mex-3	-0.416473	0.00184882	10028 - 10275	11421 - 12142	235.697	253.977	F53G12.5	MEX3B,MEX3A,MEX3C,MEX3D	ENSG00000183496,ENSG00000254726,ENSG00000176624,ENSG00000181588
WBGene00003230	mex-5	-0.596284	0.000143132	20674 - 21651	25539 - 29958	435.39	531.083	W02A2.7
WBGene00003231	mex-6	-0.657859	5.65298e-06	11430 - 12273	15189 - 16922	250.51	319.107	AH6.5
WBGene00003232	mgl-1	0.677911	0.1557	30 - 39	13 - 23	0.446667	0.196667	ZC506.4	GRM3,GRM2,GRM8,GRM7,GRM5,GRM4,GRM1,GRM6	ENSG00000198822,ENSG00000164082,ENSG00000179603,ENSG00000196277,ENSG00000168959,ENSG00000124493,ENSG00000152822,ENSG00000113262
WBGene00003233	mgl-2	0.310862	0.475197	95 - 125	35 - 120	1.35	0.88	F45H11.4	GRM1,GRM5,GRM2,GRM3,GRM4,GRM8,GRM7	ENSG00000152822,ENSG00000168959,ENSG00000164082,ENSG00000198822,ENSG00000124493,ENSG00000179603,ENSG00000196277
WBGene00003234	mif-1	0.175469	0.328705	577 - 679	456 - 526	25.0833	17.86	Y56A3A.3	MIF,MIF	ENSG00000240972,ENSG00000276701
WBGene00003235	mif-2	-0.0548434	0.740331	812 - 950	744 - 931	87.76	73.5633	C52E4.2	DDTL,DDT,DDTL,DDT	ENSG00000099974,ENSG00000099977,ENSG00000275758,ENSG00000275003
WBGene00003236	mif-3	-0.482159	0.00174473	567 - 717	693 - 835	51.0767	58.3567	F13G3.9	DDTL,DDT	ENSG00000099974,ENSG00000099977
WBGene00003237	mif-4	0.931728	0.104668	15 - 20	3 - 8	1.91333	0.603333	Y73B6BL.13
WBGene00003238	mig-1	0.346286	0.123848	222 - 236	137 - 178	5.11667	3.36667	Y34D9B.1	SFRP4,FZD10,FRZB,FZD4,FZD9	ENSG00000106483,ENSG00000111432,ENSG00000162998,ENSG00000174804,ENSG00000188763
WBGene00003239	mig-2	-0.155333	0.318851	729 - 872	705 - 847	28.5867	25.9133	C35C5.4	RAC2,RAC1,RAC3,RHOG	ENSG00000128340,ENSG00000136238,ENSG00000169750,ENSG00000177105
WBGene00003241	mig-5	-0.491164	0.000252259	3385 - 3614	4106 - 4527	64.75	73.4033	T05C12.6	DVL2,DVL1,DIXDC1,DVL3	ENSG00000004975,ENSG00000107404,ENSG00000150764,ENSG00000161202
WBGene00003242	mig-6	0.847878	2.75744e-10	5202 - 5460	2027 - 3138	39.84	17.9633	C37C3.6	PAPLN	ENSG00000100767
WBGene00003243	mig-10	0.36596	0.0237181	1384 - 1453	777 - 1252	24.4867	15.4767	F10E9.6	RAPH1,APBB1IP,GRB10,GRB14,GRB7	ENSG00000173166,ENSG00000077420,ENSG00000106070,ENSG00000115290,ENSG00000141738
WBGene00003245	mig-13	0.182376	0.522551	273 - 309	149 - 315	7.05667	5.12333	F43C9.4
WBGene00003246	mig-14	-0.298537	0.0622951	1828 - 1984	1982 - 2115	42.1567	42	R06B9.6	WLS	ENSG00000116729
WBGene00003247	mig-15	0.444136	0.015388	1747 - 1780	805 - 1497	17.7867	10.6567	ZC504.4	MAP4K4,MINK1,TNIK,NRK	ENSG00000071054,ENSG00000141503,ENSG00000154310,ENSG00000123572
WBGene00003248	mig-17	0.991748	0.00159383	147 - 172	46 - 105	4.04667	1.65333	F57B7.4
WBGene00003249	mig-18	0.937412	0.0019044	137 - 179	46 - 97	8.56333	3.54333	F11F1.6
WBGene00003252	mig-21	0.00863022	0.988443	18 - 40	24 - 30	1.21333	1.02	F01F1.13
WBGene00003253	mig-22	-0.387712	0.00258076	3786 - 3828	4010 - 4519	52.6167	55.89	PAR2.4	CHPF,CHPF2	ENSG00000123989,ENSG00000033100
WBGene00003254	mig-23	0.127069	0.497708	522 - 609	374 - 552	11.35	8.59333	R07E4.4	ENTPD7,ENTPD4,ENTPD2,ENTPD1,ENTPD3,ENTPD8	ENSG00000198018,ENSG00000197217,ENSG00000054179,ENSG00000138185,ENSG00000168032,ENSG00000188833
WBGene00003258	cogc-1	-0.272917	0.0640071	2118 - 2253	2180 - 2433	35.04	34.1567	Y54E10A.2	COG1	ENSG00000166685
WBGene00003367	mix-1	0.316397	0.0135101	4912 - 5006	2857 - 4138	44.11	28.7067	M106.1	SMC2	ENSG00000136824
WBGene00003368	mkk-4	0.692254	0.00249062	287 - 297	117 - 215	7.32333	3.64	F42G10.2	MAP2K4,MAP2K3,MAP2K6	ENSG00000065559,ENSG00000034152,ENSG00000108984
WBGene00003369	mlc-1	1.31917	5.28391e-17	7347 - 7892	2134 - 3625	262.807	85.0767	C36E6.3	MYL7,MYLPF,MYL5,MYL10,MYL2	ENSG00000106631,ENSG00000180209,ENSG00000215375,ENSG00000106436,ENSG00000111245
WBGene00003370	mlc-2	0.949743	8.73602e-16	12220 - 13990	5089 - 6854	896.73	374.107	C36E6.5	MYL7,MYLPF,MYL5,MYL10,MYL2	ENSG00000106631,ENSG00000180209,ENSG00000215375,ENSG00000106436,ENSG00000111245
WBGene00003371	mlc-3	1.09959	2.23442e-19	8239 - 9292	3057 - 3940	512.697	195.62	F09F7.2	MYL6,MYL3,MYL1,MYL6B,MYL4	ENSG00000092841,ENSG00000160808,ENSG00000168530,ENSG00000196465,ENSG00000198336
WBGene00003372	mlc-4	-0.352091	0.0108222	4985 - 5886	5760 - 6207	332.92	344.053	C56G7.1	MYL12B,MYL9,MYL12A	ENSG00000118680,ENSG00000101335,ENSG00000101608
WBGene00003373	mlh-1	-0.340272	0.0637617	2828 - 2999	2881 - 3440	50.0867	51.1	T28A8.7	MLH1	ENSG00000076242
WBGene00003374	mlk-1	0.201813	0.319744	752 - 856	471 - 755	9.21	6.53667	K11D12.10	MAP3K9,MAP3K10,MAP3K21,MAP3K11	ENSG00000006432,ENSG00000130758,ENSG00000143674,ENSG00000173327
WBGene00003375	mlp-1	0.33654	0.0543894	759 - 997	535 - 626	72.9867	46.6467	T04C9.4	CSRP3,CSRP1,CSRP2,CRIP2	ENSG00000129170,ENSG00000159176,ENSG00000175183,ENSG00000182809
WBGene00003376	mls-1	0.384998	0.557641	6 - 17	6 - 9	0.63	0.31	H14A12.4	TBX1,TBX10,TBX19,TBX6,T,TBX18	ENSG00000184058,ENSG00000167800,ENSG00000143178,ENSG00000149922,ENSG00000164458,ENSG00000112837
WBGene00003377	mls-2	0.573359	0.159123	84 - 93	29 - 87	2.92333	1.46667	C39E6.4	HMX3,HMX2,HMX1,NKX2-8,NKX2-3,NKX2-6,NKX2-2	ENSG00000188620,ENSG00000188816,ENSG00000215612,ENSG00000136327,ENSG00000119919,ENSG00000180053,ENSG00000125820
WBGene00003378	mml-1	0.257497	0.136358	1000 - 1030	582 - 954	12.1333	8.26667	T20B12.6	MLXIPL,MLXIP,MLXIP	ENSG00000009950,ENSG00000175727,ENSG00000281178
WBGene00003380	mnm-2	-0.339823	0.340272	53 - 93	76 - 92	3.51667	3.69333	C10A4.8	ZNF554,ZNF354A,ZNF354C,ZNF454,ZNF354B,ZFP90,ZNF471,ZNF485,ZNF879,ZNF8	ENSG00000172006,ENSG00000169131,ENSG00000177932,ENSG00000178187,ENSG00000178338,ENSG00000184939,ENSG00000196263,ENSG00000198298,ENSG00000234284,ENSG00000278129
WBGene00003384	moc-1	0.116385	0.611273	300 - 388	258 - 311	9.85667	7.31667	T06H11.4	GPHN	ENSG00000171723
WBGene00003385	moc-2	0.339746	0.11619	256 - 317	185 - 196	19.8667	12.4833	W01A11.6	GPHN	ENSG00000171723
WBGene00003386	mod-1	0.352682	0.467139	34 - 44	20 - 36	0.97	0.6	K06C4.6	GABRE,GABRG2,GABRG1,GABRG3	ENSG00000102287,ENSG00000113327,ENSG00000163285,ENSG00000182256
WBGene00003387	mod-5	0.40533	0.256428	75 - 77	42 - 63	1.48667	0.743333	Y54E10BR.7	SLC6A4,SLC6A2,SLC6A3,SLC6A3	ENSG00000108576,ENSG00000103546,ENSG00000142319,ENSG00000276996
WBGene00003388	moe-3	0.67735	0.0125469	198 - 329	133 - 167	7.56	3.82	F32A11.6	ZFP36L2,ZFP36L1,ZFP36	ENSG00000152518,ENSG00000185650,ENSG00000128016
WBGene00003389	mog-1	-0.0822966	0.579336	6261 - 6518	5107 - 6340	72.23	62.09	K03H1.2	DHX38,DHX16,DHX8,DHX15,DHX16,DHX16,DHX16,DHX16,DHX16,DHX16,DHX16	ENSG00000140829,ENSG00000204560,ENSG00000067596,ENSG00000109606,ENSG00000206486,ENSG00000226171,ENSG00000231377,ENSG00000233049,ENSG00000233418,ENSG00000233561,ENSG00000227222
WBGene00003390	mog-2	-0.298276	0.034921	2116 - 2464	2381 - 2409	89.95	88.5967	H20J04.8	SNRPA1	ENSG00000131876
WBGene00003391	mog-3	-0.0720428	0.69928	2682 - 3120	2518 - 2661	79.8267	68.3433	F52C9.7	CWC25,CWC25	ENSG00000273559,ENSG00000276761
WBGene00003392	mog-4	0.129475	0.442464	2432 - 2826	1843 - 2232	47.13	35.43	C04H5.6	DHX16,DHX16,DHX16,DHX16,DHX16,DHX16,DHX16,DHX38,DHX8,DHX15,DHX16	ENSG00000204560,ENSG00000206486,ENSG00000226171,ENSG00000231377,ENSG00000233049,ENSG00000233418,ENSG00000233561,ENSG00000140829,ENSG00000067596,ENSG00000109606,ENSG00000227222
WBGene00003393	mog-5	-0.0626253	0.700539	4987 - 5435	3959 - 5475	52.9267	44.8767	EEED8.5	DHX8,DHX38,DHX16,DHX15,DHX16,DHX16,DHX16,DHX16,DHX16,DHX16,DHX16	ENSG00000067596,ENSG00000140829,ENSG00000204560,ENSG00000109606,ENSG00000206486,ENSG00000226171,ENSG00000231377,ENSG00000233049,ENSG00000233418,ENSG00000233561,ENSG00000227222
WBGene00003394	mom-1	-0.208742	0.476914	170 - 218	155 - 291	5.25333	5.08	T07H6.2	PORCN	ENSG00000102312
WBGene00003395	mom-2	-0.471422	0.0051549	3045 - 3205	3456 - 4060	83.7733	93.7733	F38E1.7	WNT11,WNT9A,WNT9B	ENSG00000085741,ENSG00000143816,ENSG00000158955
WBGene00003396	mom-4	-0.424238	0.000315909	1740 - 1968	2022 - 2360	34.7267	37.9367	F52F12.3	MAP3K7	ENSG00000135341
WBGene00003397	mom-5	-0.384459	0.000564393	4795 - 5767	5345 - 6965	84.27	89.4067	T23D8.1	FZD7,FZD1,FZD2,FZD3,FZD6,FZD10,FZD5,SMO,FZD4,FZD9	ENSG00000155760,ENSG00000157240,ENSG00000180340,ENSG00000104290,ENSG00000164930,ENSG00000111432,ENSG00000163251,ENSG00000128602,ENSG00000174804,ENSG00000188763
WBGene00003400	dapk-1	0.795404	2.3291e-05	652 - 776	285 - 432	7.32667	3.40667	K12C11.4	DAPK1,DAPK2,STK17B,STK17A,DAPK3	ENSG00000196730,ENSG00000035664,ENSG00000081320,ENSG00000164543,ENSG00000167657
WBGene00003401	mpk-1	-0.269711	0.0645339	3288 - 3374	3206 - 3762	69.1567	67.3833	F43C1.2	MAPK1,MAPK3,MAPK7	ENSG00000100030,ENSG00000102882,ENSG00000166484
WBGene00003402	mpk-2	0.237288	0.371077	208 - 253	137 - 194	5.37	4.02	C04G6.1	MAPK7	ENSG00000166484
WBGene00003403	mps-1	0.911386	0.132599	8 - 14	2 - 4	0.57	0.09	C29F5.4
WBGene00003404	mpz-1	0.487327	0.0406374	393 - 437	189 - 307	4.16667	2.33667	C52A11.4	MPDZ,PATJ	ENSG00000107186,ENSG00000132849
WBGene00003405	mre-11	-0.433512	0.00795917	3729 - 3863	4137 - 4858	63.9233	69.5167	ZC302.1	MRE11	ENSG00000020922
WBGene00003406	mrg-1	-0.478996	0.000720887	5916 - 6298	7221 - 7610	200.83	226.663	Y37D8A.9	MORF4L1,MORF4L2	ENSG00000185787,ENSG00000123562
WBGene00003407	mrp-1	0.616463	6.93729e-06	1778 - 1927	874 - 1196	22.11	11.57	F57C12.5	ABCC1,ABCC2,ABCC3,ABCC1,ABCC6,ABCC5,ABCC11,ABCC12,ABCC4,ABCC8,ABCC9,ABCC10	ENSG00000103222,ENSG00000023839,ENSG00000108846,ENSG00000278183,ENSG00000091262,ENSG00000114770,ENSG00000121270,ENSG00000140798,ENSG00000125257,ENSG00000006071,ENSG00000069431,ENSG00000124574
WBGene00003408	mrp-2	0.4185	0.0394018	1288 - 1467	641 - 1285	11.38	6.97333	F57C12.4	ABCC1,ABCC2,ABCC3,ABCC6,ABCC1,ABCC5,ABCC11,ABCC12,ABCC4,ABCC8,ABCC9,ABCC10	ENSG00000103222,ENSG00000023839,ENSG00000108846,ENSG00000091262,ENSG00000278183,ENSG00000114770,ENSG00000121270,ENSG00000140798,ENSG00000125257,ENSG00000006071,ENSG00000069431,ENSG00000124574
WBGene00003409	mrp-3	-0.108356	0.608032	415 - 533	366 - 522	3.93667	3.45333	E03G2.2	ABCC3,ABCC2,ABCC6,ABCC1,ABCC5,ABCC11,ABCC12,ABCC4,ABCC8,ABCC9,ABCC10	ENSG00000108846,ENSG00000023839,ENSG00000091262,ENSG00000103222,ENSG00000114770,ENSG00000121270,ENSG00000140798,ENSG00000125257,ENSG00000006071,ENSG00000069431,ENSG00000124574
WBGene00003410	mrp-4	-0.641272	4.39333e-07	7014 - 7627	8841 - 10620	57.6133	72.9533	F21G4.2	ABCC3,ABCC2,ABCC6,ABCC1,ABCC5,ABCC11,ABCC12,ABCC4,ABCC8,ABCC9,ABCC10	ENSG00000108846,ENSG00000023839,ENSG00000091262,ENSG00000103222,ENSG00000114770,ENSG00000121270,ENSG00000140798,ENSG00000125257,ENSG00000006071,ENSG00000069431,ENSG00000124574
WBGene00003411	mrp-5	0.283557	0.0825777	5111 - 5727	2974 - 4910	45.8067	30.7333	F14F4.3	ABCC5,ABCC11,ABCC12,ABCC2,ABCC6,ABCC1,ABCC3,ABCC4,ABCC8,ABCC9,ABCC10	ENSG00000114770,ENSG00000121270,ENSG00000140798,ENSG00000023839,ENSG00000091262,ENSG00000103222,ENSG00000108846,ENSG00000125257,ENSG00000006071,ENSG00000069431,ENSG00000124574
WBGene00003412	mrp-6	-0.199431	0.367173	375 - 430	332 - 446	3.55333	3.29667	F20B6.3	ABCC4,ABCC2,ABCC6,ABCC1,ABCC3,ABCC5,ABCC11,ABCC12,CFTR,ABCC8,ABCC9,ABCC10	ENSG00000125257,ENSG00000023839,ENSG00000091262,ENSG00000103222,ENSG00000108846,ENSG00000114770,ENSG00000121270,ENSG00000140798,ENSG00000001626,ENSG00000006071,ENSG00000069431,ENSG00000124574
WBGene00003413	mrp-7	-0.304957	0.0510834	4370 - 4900	4408 - 5499	37.5467	37.6867	Y43F8C.12	ABCC3,ABCC2,ABCC6,ABCC1,ABCC5,ABCC11,ABCC12,CFTR,ABCC4,ABCC8,ABCC9,ABCC10	ENSG00000108846,ENSG00000023839,ENSG00000091262,ENSG00000103222,ENSG00000114770,ENSG00000121270,ENSG00000140798,ENSG00000001626,ENSG00000125257,ENSG00000006071,ENSG00000069431,ENSG00000124574
WBGene00003414	mrp-8	0.424949	0.139018	200 - 225	96 - 201	1.83333	1.11	Y75B8A.26	ABCC2,ABCC6,ABCC1,ABCC3,ABCC5,ABCC11,ABCC12,ABCC4,ABCC8,ABCC9,ABCC10	ENSG00000023839,ENSG00000091262,ENSG00000103222,ENSG00000108846,ENSG00000114770,ENSG00000121270,ENSG00000140798,ENSG00000125257,ENSG00000006071,ENSG00000069431,ENSG00000124574
WBGene00003415	mars-1	-0.189015	0.234929	8039 - 8329	7649 - 8768	162.573	149.513	F58B3.5	MARS	ENSG00000166986
WBGene00003417	mrt-2	-0.265891	0.149679	533 - 640	554 - 655	23.1867	22.5167	Y41C4A.14	RAD1	ENSG00000113456
WBGene00003418	msh-2	-0.452195	0.000912081	4099 - 4398	4864 - 5288	64.4467	71.34	H26D21.2	MSH2	ENSG00000095002
WBGene00003420	msh-4	0.254464	0.541856	58 - 65	38 - 52	4.09	2.75333	T02G5.6
WBGene00003421	msh-5	0.151315	0.386155	1581 - 1759	1081 - 1434	17.6867	13.21	F09E8.3	MSH5,MSH5,MSH5,MSH5,MSH5,MSH5-SAPCD1,MSH5-SAPCD1,MSH5,MSH5,MSH5	ENSG00000204410,ENSG00000227314,ENSG00000230293,ENSG00000235222,ENSG00000230961,ENSG00000255152,ENSG00000264619,ENSG00000233345,ENSG00000235569,ENSG00000237333
WBGene00003422	msh-6	-0.152479	0.315542	5895 - 5959	5255 - 6144	64.5833	58.0133	Y47G6A.11	MSH6	ENSG00000116062
WBGene00003423	msi-1	-0.171026	0.255248	1222 - 1339	1112 - 1304	21.2467	19.1367	R10E9.1	MSI1,MSI2	ENSG00000135097,ENSG00000153944
WBGene00003424	msp-3	0.225352	0.642876	7 - 81	0 - 31	4.9	1.52667	F26G1.7
WBGene00003425	msp-10	0.165142	0.779276	0 - 15	0 - 10	9.57	3.34667	K07F5.2
WBGene00003426	msp-19	0.300086	0.555498	7 - 55	0 - 20	11.4967	2.40667	F36H12.7
WBGene00003429	msp-31	0.51013	0.384163	19 - 158	20 - 73	12.3133	5.74333	R05F9.13
WBGene00003431	msp-33	0.284939	0.602665	5 - 125	0 - 58	8.79667	3.02	R05F9.8
WBGene00003432	msp-36	0.197691	0.661738	14 - 225	0 - 87	12.39	3.35667	C04G2.4
WBGene00003434	msp-38	0.337966	0.530992	9 - 109	0 - 37	5.63	1.60333	K08F4.8
WBGene00003435	msp-40	0.238847	0.657397	7 - 149	0 - 78	11.5067	4.56333	C33F10.9
[truncated: 14,829 more rows]

## Sheet: DE Analysis- Significant ONLY
WBGeneID	GeneSymbol	DESeq2_log2FC (hpk-1 vs N2)	DESeq2_fdrpval	raw count range: hpk-1	raw count range: N2	avg_TPM: hpk-1	avg_TPM: N2	molecular_name	Human_GeneSymbol	Human_EnsemblID
WBGene00000650	col-74	5.42852	2.02792e-59	398 - 717	4 - 9	22.5733	0.196667	ZK1248.2	COLQ	ENSG00000206561
WBGene00000738	col-165	5.32386	2.59888e-46	281 - 632	3 - 7	18.3633	0.133333	F14H12.1	MARCO	ENSG00000019169
WBGene00000668	col-93	4.77301	3.55957e-102	8199 - 11140	157 - 408	586.18	15.3133	W05B2.5	SFTPD	ENSG00000133661
WBGene00009041	cut-3	4.44012	2.78238e-68	692 - 875	16 - 41	24.8067	0.763333	F22B5.3
WBGene00015573	C07G1.7	4.37789	7.67463e-21	80 - 104	0 - 1	5.62333	0	C07G1.7
WBGene00007425	cht-5	3.70431	1.0365e-18	102 - 133	1 - 8	2.72	0.0766667	C08B6.4
WBGene00006948	wrt-2	3.69114	8.22845e-34	346 - 795	25 - 37	15.11	0.723333	F52E4.6	DHH,IHH,SHH	ENSG00000139549,ENSG00000163501,ENSG00000164690
WBGene00019154	glf-1	3.55964	2.15722e-28	435 - 934	22 - 68	17.1467	0.906667	H04M03.4
WBGene00001858	hil-7	3.53403	3.03012e-56	459 - 491	26 - 36	43.0133	2.45333	C01B10.5
WBGene00235268	Y54G2A.76	3.44612	4.27181e-17	130 - 269	2 - 19	13.7367	0.593333	Y54G2A.76
WBGene00017199	clec-45	3.42291	3.03263e-26	291 - 404	10 - 40	32.7367	1.85667	F07C4.2
WBGene00044024	C35A5.11	3.38491	2.97464e-17	93 - 119	3 - 7	8.19333	0.356667	C35A5.11
WBGene00010835	M03B6.3	3.31565	1.46314e-20	201 - 528	14 - 37	5.89667	0.363333	M03B6.3
WBGene00017560	F18C5.5	3.27417	8.05575e-14	92 - 192	2 - 15	7.66	0.326667	F18C5.5
WBGene00008449	E01G6.1	3.2717	1.21016e-13	64 - 118	2 - 7	0.77	0.0366667	E01G6.1	TFPI	ENSG00000003436
WBGene00020616	T20D4.10	3.25638	3.49549e-28	204 - 251	10 - 21	14.2067	1.02	T20D4.10
WBGene00020626	T20F5.4	3.18672	3.3155e-26	261 - 356	13 - 39	8.86333	0.663333	T20F5.4
WBGene00016133	C26B9.3	3.17743	1.0365e-18	334 - 583	11 - 61	19.7233	1.26333	C26B9.3
WBGene00077697	F58E6.13	3.16193	4.48185e-15	95 - 111	2 - 12	5.23333	0.386667	F58E6.13	CD93,SCUBE3,SCUBE1,CD248,SCUBE2,CLEC14A,THBD	ENSG00000125810,ENSG00000146197,ENSG00000159307,ENSG00000174807,ENSG00000175356,ENSG00000176435,ENSG00000178726
WBGene00008376	D1054.9	3.15999	5.75358e-15	163 - 329	7 - 34	6.8	0.396667	D1054.9
WBGene00000785	cpr-5	3.15762	2.04637e-59	1845 - 2386	158 - 208	74.89	6.15333	W07B8.5	CTSB	ENSG00000164733
WBGene00002051	ifa-3	3.14204	5.08916e-33	242 - 276	19 - 24	5.17667	0.396667	F52E10.5	LMNB2,LMNB1,LMNA,LMNTD1	ENSG00000176619,ENSG00000113368,ENSG00000160789,ENSG00000152936
WBGene00019318	K02E10.4	3.1237	5.79265e-33	327 - 429	24 - 49	10.1167	0.826667	K02E10.4
WBGene00022577	nstp-3	3.11016	2.15683e-13	66 - 107	4 - 7	3.32333	0.196667	ZC250.3	SLC35A2	ENSG00000102100
WBGene00010285	F58H1.2	3.06056	1.87599e-16	110 - 165	7 - 13	8.23333	0.526667	F58H1.2
WBGene00009261	F30A10.2	3.06014	1.19758e-19	163 - 292	11 - 28	10.25	0.756667	F30A10.2
WBGene00012540	Y37A1B.7	3.04966	8.92828e-15	131 - 229	5 - 23	11.61	0.766667	Y37A1B.7
WBGene00015679	C10F3.7	3.03273	5.11418e-09	36 - 46	0 - 2	2.65	0.0233333	C10F3.7
WBGene00000711	col-138	3.02655	4.39657e-09	28 - 221	1 - 5	4.76667	0.103333	C52D10.13	MARCO	ENSG00000019169
WBGene00006651	tts-2	3.02196	5.28979e-31	341 - 542	32 - 49	21.7967	1.84667	R05H5.8
WBGene00001069	dpy-7	3.01483	3.88976e-24	597 - 1188	54 - 134	32.8833	2.70667	F46C8.6	SFTPD	ENSG00000133661
WBGene00017716	sups-1	3.00506	1.20501e-17	263 - 622	22 - 67	9.83667	0.756667	F22F4.1
WBGene00000715	col-142	3.00368	3.02975e-31	892 - 1957	103 - 133	55.2433	4.72	T15B7.4	SFTPD	ENSG00000133661
WBGene00011175	R09E10.5	3.00274	6.21836e-27	250 - 303	18 - 38	2.45	0.2	R09E10.5	SUSD2,MUC4	ENSG00000099994,ENSG00000145113
WBGene00009608	nhr-265	2.99133	9.11202e-09	33 - 47	0 - 1	1.4	0.0266667	F41D3.3
WBGene00013852	hhat-1	2.97665	1.08529e-19	188 - 320	15 - 37	6.31	0.506667	ZC101.3	HHAT,HHAT,HHATL	ENSG00000054392,ENSG00000280680,ENSG00000010282
WBGene00008477	clec-17	2.95789	2.08069e-23	220 - 359	21 - 37	9.05667	0.8	E03H4.10	CLEC3B,CLEC3A	ENSG00000163815,ENSG00000166509
WBGene00019520	K08B12.1	2.95639	2.78226e-15	250 - 558	15 - 66	14.18	1.10667	K08B12.1
WBGene00008851	F15B9.8	2.95196	6.16187e-19	483 - 748	24 - 102	39.6767	3.34333	F15B9.8
WBGene00007996	C38C6.3	2.93852	1.65144e-10	62 - 128	1 - 11	3.57333	0.203333	C38C6.3
WBGene00000669	col-94	2.92704	1.22853e-38	849 - 1009	61 - 154	216.073	22.46	W05B2.1	SFTPD	ENSG00000133661
WBGene00022024	Y64H9A.2	2.9025	3.08325e-10	99 - 146	1 - 19	9.77667	0.563333	Y64H9A.2
WBGene00017018	D1014.5	2.9017	5.23807e-14	221 - 345	10 - 52	5.21333	0.403333	D1014.5
WBGene00020242	phat-5	2.89262	5.81276e-16	142 - 215	9 - 26	7.98333	0.69	T05B4.11
WBGene00016805	C50D2.1	2.89047	1.16288e-16	124 - 227	11 - 20	3.83333	0.316667	C50D2.1
WBGene00022611	ZC449.1	2.87674	1.65132e-12	83 - 146	5 - 15	2.76667	0.17	ZC449.1
WBGene00014067	ZK675.4	2.85897	5.28765e-08	29 - 40	0 - 1	2.11	0.04	ZK675.4
WBGene00021627	Y47D7A.15	2.85697	1.33183e-08	35 - 61	1 - 2	1.41667	0.0433333	Y47D7A.15
WBGene00000722	col-149	2.8561	5.70984e-11	593 - 1534	49 - 124	43.8833	3.02667	B0024.1	SFTPD	ENSG00000133661
WBGene00015340	C02E7.7	2.85511	4.73769e-09	453 - 837	16 - 72	117.94	6.00667	C02E7.7
WBGene00022665	ZK154.1	2.85334	2.51469e-18	182 - 297	16 - 37	13.71	1.28	ZK154.1
WBGene00003888	osm-8	2.84949	1.27743e-10	75 - 148	3 - 17	4.25667	0.273333	R07G3.6
WBGene00003514	myo-2	2.84819	1.06082e-14	344 - 506	14 - 81	2.71	0.233333	T18D3.4	MYH7B,MYH13,MYH7,MYH1,MYH3,MYH2,MYH8,MYH15,MYH6,MYH4,MYO5C,MYO5B,MYO5A,MYH9,MYH14,MYH10,MYH11	ENSG00000078814,ENSG00000006788,ENSG00000092054,ENSG00000109061,ENSG00000109063,ENSG00000125414,ENSG00000133020,ENSG00000144821,ENSG00000197616,ENSG00000264424,ENSG00000128833,ENSG00000167306,ENSG00000197535,ENSG00000100345,ENSG00000105357,ENSG00000133026,ENSG00000133392
WBGene00001724	grl-15	2.83587	1.71324e-18	382 - 580	25 - 87	31.1567	2.8	Y75B8A.20
WBGene00006051	ssq-2	2.81187	5.89175e-08	21 - 237	2 - 6	3.44	0.1	T28H11.5	ELN	ENSG00000049540
WBGene00008496	F01D5.6	2.79679	1.89269e-11	201 - 331	5 - 49	7.29333	0.61	F01D5.6
WBGene00012257	lpr-4	2.78998	1.44612e-08	969 - 2055	46 - 182	46.94	2.58	W04G3.3
WBGene00001108	dsl-6	2.77537	3.43789e-17	148 - 195	11 - 21	7.11	0.626667	H02I12.4
WBGene00004219	ptr-4	2.77153	1.48953e-21	907 - 1223	71 - 222	14.2433	1.42667	C45B2.7	PTCHD1,PTCHD3,PTCHD4	ENSG00000165186,ENSG00000182077,ENSG00000244694
WBGene00000732	col-159	2.75694	6.93957e-29	784 - 1455	92 - 184	49.35	5.41667	F57B1.3	MARCO	ENSG00000019169
WBGene00020976	oac-51	2.75455	1.0435e-10	63 - 84	3 - 9	1.82333	0.0933333	W03B1.7
WBGene00019285	cbn-1	2.75166	1.08246e-13	117 - 213	10 - 28	3.47667	0.276667	K01A2.11
WBGene00000625	col-48	2.72981	2.25548e-15	354 - 630	27 - 94	22.2467	2.16667	Y54E10BL.2	COL17A1,MARCO	ENSG00000065618,ENSG00000019169
WBGene00009094	F23H12.5	2.72001	6.35598e-17	319 - 555	27 - 86	6.41	0.656667	F23H12.5
WBGene00006947	wrt-1	2.71898	2.96191e-20	393 - 798	46 - 102	15.41	1.64	ZK1290.12	DHH,IHH,SHH	ENSG00000139549,ENSG00000163501,ENSG00000164690
WBGene00008605	mlt-9	2.70024	1.53264e-14	313 - 742	31 - 102	10.4933	1.05	F09B12.1
WBGene00011548	T06G6.6	2.6961	4.64928e-12	153 - 301	10 - 43	12.08	1.11	T06G6.6
WBGene00017305	nspb-12	2.69548	3.02342e-07	32 - 76	0 - 6	6.73	0.25	F09F7.8
WBGene00175027	W02F12.8	2.69189	1.6673e-12	103 - 112	6 - 19	18.1967	1.48333	W02F12.8
WBGene00019272	H42K12.3	2.6886	3.87059e-09	453 - 1201	44 - 113	20.54	1.49333	H42K12.3	KCTD5,KCTD2	ENSG00000167977,ENSG00000180901
WBGene00044379	ifas-1	2.68766	1.73002e-12	81 - 178	11 - 13	6.82333	0.56	F40H7.12
WBGene00006053	ssq-4	2.68556	3.12184e-07	18 - 290	3 - 9	5.27333	0.196667	T28H11.1	ELN	ENSG00000049540
WBGene00010509	K02E2.8	2.68439	1.29845e-08	53 - 114	2 - 14	6.62	0.383333	K02E2.8
WBGene00021095	mlt-8	2.68049	4.83181e-22	1313 - 1945	120 - 339	65.36	7.30667	W08F4.6
WBGene00021513	Y41D4B.6	2.67741	1.92487e-10	65 - 92	4 - 12	2.53	0.186667	Y41D4B.6
WBGene00001716	grl-7	2.67709	5.58074e-11	136 - 450	13 - 49	10.2433	0.92	T02E9.2
WBGene00008891	clec-42	2.6722	1.02103e-09	120 - 266	5 - 38	4.74333	0.393333	F16H6.1	TNFAIP6	ENSG00000123610
WBGene00007344	C05E7.2	2.67163	5.3086e-10	59 - 92	5 - 7	3.26333	0.223333	C05E7.2
WBGene00015993	C18H7.1	2.65019	3.23924e-08	43 - 49	2 - 4	1.33667	0.08	C18H7.1	MATN1,VWA2	ENSG00000162510,ENSG00000165816
WBGene00000641	col-65	2.64243	1.46767e-13	310 - 675	31 - 103	22.16	2.25333	K08C9.4	SFTPD	ENSG00000133661
WBGene00012032	T26C5.2	2.63464	1.05998e-15	326 - 597	32 - 96	9.53	1.01	T26C5.2
WBGene00013962	ZK287.1	2.6267	2.82411e-21	262 - 275	17 - 44	6.18333	0.686667	ZK287.1
WBGene00019563	K09C6.9	2.61268	1.0549e-08	91 - 174	3 - 24	8.85667	0.7	K09C6.9
WBGene00017052	D2024.4	2.599	2.50215e-07	41 - 83	1 - 9	2.22667	0.13	D2024.4
WBGene00001064	dpy-2	2.5975	7.06383e-10	964 - 1713	83 - 233	41.8267	3.88	T14B4.6	MARCO	ENSG00000019169
WBGene00011278	R74.2	2.59039	2.89516e-11	138 - 260	11 - 40	8.24667	0.776667	R74.2
WBGene00000252	bli-2	2.57315	2.51382e-07	50 - 90	1 - 11	2.79667	0.153333	F59E12.12	MARCO	ENSG00000019169
WBGene00000657	col-81	2.57136	2.58583e-06	188 - 2094	27 - 27	40.8067	1.03333	F38A3.1	MARCO	ENSG00000019169
WBGene00019148	H03E18.1	2.56909	3.81355e-18	380 - 671	50 - 114	5.92	0.7	H03E18.1
WBGene00020033	R12E2.7	2.55936	2.64698e-21	286 - 363	29 - 64	39.7433	4.93	R12E2.7
WBGene00017535	atf-8	2.55842	3.45389e-09	70 - 125	5 - 17	4.33333	0.373333	F17A9.3	DBP,HLF,TEF	ENSG00000105516,ENSG00000108924,ENSG00000167074
WBGene00010830	appg-1	2.55627	3.82005e-07	46 - 71	0 - 10	0.77	0.04	M02G9.1
WBGene00019839	R02F11.1	2.55377	2.55051e-06	174 - 464	4 - 28	17.75	0.603333	R02F11.1
WBGene00015572	C07G1.6	2.55023	1.76314e-06	27 - 41	0 - 4	1.7	0.0733333	C07G1.6
WBGene00000705	col-131	2.54947	7.80247e-17	152 - 225	20 - 28	8.34333	0.893333	C39E9.3	SFTPD	ENSG00000133661
WBGene00000683	col-109	2.54649	4.6678e-10	122 - 257	10 - 40	6.78667	0.693333	Y38C1BA.3
WBGene00013173	Y53F4B.27	2.54455	2.23299e-11	114 - 238	11 - 35	4.07333	0.43	Y53F4B.27
WBGene00000743	col-170	2.53912	2.17684e-08	49 - 207	7 - 16	11.66	0.96	T10E10.6	MARCO	ENSG00000019169
WBGene00013637	Y105C5A.13	2.53531	6.64825e-12	115 - 135	8 - 20	5.54667	0.92	Y105C5A.13
WBGene00006584	tni-1	2.53052	1.36373e-35	1422 - 2230	206 - 327	70.8867	9.23	F42E11.4	TNNI3,TNNI2,TNNI1	ENSG00000129991,ENSG00000130598,ENSG00000159173
WBGene00008215	C49F8.3	2.52703	1.0786e-12	280 - 419	22 - 83	21.91	2.49	C49F8.3
WBGene00017991	clec-180	2.52515	1.3295e-15	517 - 876	53 - 168	12.8833	1.72333	F32E10.3
WBGene00003703	nhr-113	2.52501	4.41862e-07	30 - 56	1 - 4	3.10333	0.216667	ZK1025.9
WBGene00019184	H10E21.4	2.51803	1.03837e-12	290 - 519	26 - 93	19.4733	2.23333	H10E21.4
WBGene00004133	abu-13	2.5151	2.82563e-13	273 - 710	39 - 101	15.4667	1.71333	F57B9.9
WBGene00011796	T16G1.2	2.50739	1.71924e-12	114 - 187	12 - 30	4.86	0.606667	T16G1.2
WBGene00007174	mboa-1	2.50549	4.23305e-13	128 - 237	15 - 33	4.88667	0.563333	B0395.2	SOAT1,SOAT2	ENSG00000057252,ENSG00000167780
WBGene00017073	D2096.6	2.49849	9.02359e-09	85 - 134	5 - 22	6.11	0.6	D2096.6
WBGene00004153	pqn-71	2.48794	1.95331e-06	27 - 43	1 - 2	1.34	0.0666667	T23F1.6	KRTAP10-2,KRTAP10-3	ENSG00000205445,ENSG00000212935
WBGene00000707	col-133	2.48702	2.2306e-10	230 - 455	17 - 78	14.9067	1.6	F52B11.4	MARCO	ENSG00000019169
WBGene00000703	col-129	2.48674	5.01824e-06	365 - 3376	45 - 92	61.5433	2.17667	M18.1	SFTPD	ENSG00000133661
WBGene00001070	dpy-8	2.48536	2.5426e-13	178 - 483	37 - 48	8.24333	0.92	C31H2.2
WBGene00012255	lpr-6	2.47623	5.16459e-07	911 - 1520	42 - 205	43.4867	3.37667	W04G3.1
WBGene00015339	C02E7.6	2.4727	2.68828e-10	151 - 329	13 - 52	37.97	4.07667	C02E7.6
WBGene00012939	subs-4	2.47031	1.66793e-11	152 - 261	14 - 45	4.73333	0.593333	Y47D3B.1
WBGene00020550	idpp-1	2.46719	2.91327e-06	21 - 78	1 - 4	0.84	0.0433333	T17H7.1
WBGene00050875	bah-1	2.46087	7.2685e-09	76 - 146	4 - 22	4.15667	0.413333	ZK1025.7
WBGene00050939	C05G5.7	2.45981	2.04741e-14	149 - 258	22 - 28	29.13	3.07	C05G5.7
WBGene00001065	dpy-3	2.45727	1.80268e-12	180 - 409	23 - 58	14.4	1.71	EGAP7.1	C1QTNF2,C1QTNF7,ADIPOQ,OTOL1,C1QTNF9B,C1QTNF9	ENSG00000145861,ENSG00000163145,ENSG00000181092,ENSG00000182447,ENSG00000205863,ENSG00000240654
WBGene00000712	col-139	2.45483	7.2727e-06	258 - 2736	40 - 56	54.27	1.78667	F41F3.4
WBGene00004264	qua-1	2.45416	6.30823e-13	320 - 622	28 - 105	5.07667	0.613333	T05C12.10	FLG,FLG2,HRNR	ENSG00000143631,ENSG00000143520,ENSG00000197915
WBGene00017514	F16F9.3	2.45176	1.02181e-06	50 - 56	1 - 10	3.31	0.21	F16F9.3
WBGene00008150	mam-2	2.44869	4.29217e-08	95 - 174	4 - 31	2.17	0.206667	C47E12.6
WBGene00004230	ptr-16	2.44827	5.38241e-09	90 - 189	6 - 29	2.01333	0.22	T21H3.2	PTCHD1,PTCHD3,PTCHD4	ENSG00000165186,ENSG00000182077,ENSG00000244694
WBGene00001075	dpy-14	2.44598	7.22106e-22	3868 - 4982	399 - 1107	177.403	24.4333	H27M09.4	MARCO	ENSG00000019169
WBGene00020554	T19A5.3	2.44332	1.1568e-15	288 - 542	36 - 89	6.77	0.853333	T19A5.3
WBGene00020571	lpr-7	2.44056	7.38096e-10	103 - 161	8 - 30	4.97	0.493333	T19D7.3
WBGene00020561	T19C3.3	2.43866	5.16495e-14	185 - 403	30 - 53	39.8467	5.01	T19C3.3
WBGene00016450	clec-5	2.43684	4.58221e-43	783 - 933	99 - 174	26.6	3.81	C35D10.14	CLEC3B,CLEC3A	ENSG00000163815,ENSG00000166509
WBGene00007264	C02F4.4	2.4321	2.34334e-12	166 - 254	14 - 45	9.7	1.15667	C02F4.4
WBGene00044113	C54F6.15	2.42919	4.06394e-06	30 - 34	0 - 3	4.68667	0.26	C54F6.15
WBGene00044621	bus-5	2.42721	1.78696e-06	372 - 1041	32 - 110	26.9967	1.94667	F53B1.4
WBGene00001570	gei-13	2.42448	3.80753e-18	450 - 703	53 - 137	8.41667	1.14	F58A4.11
WBGene00001691	grd-2	2.41871	3.52791e-07	41 - 68	2 - 10	0.78	0.07	F46B3.5	DHH	ENSG00000139549
WBGene00017307	F09F9.2	2.41645	3.8056e-06	267 - 488	6 - 49	23.04	1.45	F09F9.2
WBGene00009355	F33A8.7	2.41386	1.04116e-08	102 - 162	4 - 29	8.76667	0.95	F33A8.7
WBGene00000672	col-97	2.41382	2.57489e-13	181 - 294	18 - 50	9.06667	1.09	ZK1010.7
WBGene00020017	R12A1.3	2.41318	1.04073e-05	11 - 61	0 - 3	1.32333	0.0433333	R12A1.3	WFDC8,EPPIN,EPPIN-WFDC6,WFDC6	ENSG00000158901,ENSG00000101448,ENSG00000249139,ENSG00000243543
WBGene00008028	scl-6	2.40879	3.44782e-06	27 - 49	1 - 6	2.39333	0.153333	C39E9.4	CRISP3,CRISP2,GLIPR1,R3HDML,CRISPLD2,CRISPLD1,CRISP1,PI15,PI16,GLIPR1L1,CLEC18B,CLEC18A,CLEC18C,GLIPR1L2	ENSG00000096006,ENSG00000124490,ENSG00000139278,ENSG00000101074,ENSG00000103196,ENSG00000121005,ENSG00000124812,ENSG00000137558,ENSG00000164530,ENSG00000173401,ENSG00000140839,ENSG00000157322,ENSG00000157335,ENSG00000180481
WBGene00008732	F13B12.4	2.40512	7.39524e-08	58 - 92	3 - 15	2.14	0.213333	F13B12.4	CBS,CBSL	ENSG00000160200,ENSG00000274276
WBGene00007659	pals-5	2.40445	2.18957e-08	54 - 89	6 - 9	2.66333	0.27	C17H1.6
WBGene00000634	col-58	2.40112	6.56374e-08	70 - 148	5 - 24	4.82	0.496667	F26B1.4	COLQ	ENSG00000206561
WBGene00007343	C05E7.1	2.39977	5.36918e-11	98 - 164	11 - 27	5.78	0.71	C05E7.1
WBGene00000609	col-20	2.39739	7.03629e-65	23373 - 33248	4060 - 4422	1085.27	160.243	F11G11.11
WBGene00007177	oac-1	2.393	8.96338e-08	52 - 107	3 - 13	1.61667	0.13	B0399.2
WBGene00020083	R57.2	2.38271	3.46988e-11	130 - 212	13 - 39	9.56	1.17333	R57.2
WBGene00015403	clec-10	2.38234	1.63955e-19	263 - 383	35 - 61	10.1267	1.37333	C03H5.1	CLEC3B,CLEC3A	ENSG00000163815,ENSG00000166509
WBGene00004232	ptr-18	2.37751	3.59163e-12	342 - 579	33 - 125	6.52333	0.84	Y38F1A.3	PTCHD1,PTCHD3,PTCHD4	ENSG00000165186,ENSG00000182077,ENSG00000244694
WBGene00007800	C29A12.6	2.37716	4.85481e-06	27 - 36	1 - 3	0.57	0.0333333	C29A12.6
WBGene00012256	lpr-5	2.37356	1.05417e-06	758 - 1849	73 - 230	24.6833	2.16333	W04G3.2
WBGene00010157	oac-34	2.37165	6.86784e-12	105 - 124	10 - 22	2.16667	0.24	F56G4.1
WBGene00017068	D2092.8	2.36384	2.60389e-09	72 - 126	10 - 14	8.51667	0.996667	D2092.8
WBGene00011508	T05H10.3	2.35804	3.32078e-20	484 - 655	50 - 134	39.67	5.64667	T05H10.3
WBGene00009090	fipr-3	2.35676	6.40088e-09	96 - 161	7 - 32	16.36	1.92333	F23D12.6
WBGene00009621	fipr-21	2.35309	2.62759e-25	1683 - 2209	213 - 494	212.13	31.8967	F41E7.5
WBGene00044068	syd-9	2.35281	2.02989e-29	541 - 598	63 - 126	8.32	1.33333	ZK867.1	ZFP57	ENSG00000204644
WBGene00004017	phg-1	2.35137	4.07297e-11	162 - 242	14 - 47	9.43333	1.20667	F27E5.4	GAS1	ENSG00000180447
WBGene00015335	acdh-6	2.34788	3.3663e-09	80 - 145	8 - 25	3.86333	0.446667	C02D5.1
WBGene00009848	F48F5.6	2.34654	6.47948e-07	41 - 61	2 - 8	5.55667	0.476667	F48F5.6
WBGene00044724	R02E4.3	2.34424	3.12158e-15	218 - 254	24 - 60	33.4233	4.70333	R02E4.3
WBGene00009331	F32D8.7	2.34229	1.81525e-11	121 - 130	9 - 27	3.16667	0.373333	F32D8.7
WBGene00007097	B0024.4	2.34081	5.40939e-22	2246 - 3123	280 - 701	81.5867	12.1033	B0024.4
WBGene00015645	lips-7	2.33693	2.51381e-07	55 - 95	4 - 17	3.39	0.323333	C09E8.2
WBGene00022415	Y102A11A.5	2.33558	3.89878e-08	132 - 320	14 - 62	22.3367	2.54333	Y102A11A.5
WBGene00020803	T25E4.1	2.33375	5.44844e-06	29 - 46	1 - 4	1.52667	0.0966667	T25E4.1
WBGene00010225	ttr-31	2.33309	8.21457e-22	586 - 620	64 - 154	48.35	7.32667	F58A3.5
WBGene00018803	fbxa-24	2.33149	2.37519e-12	111 - 115	14 - 18	3.51	0.473333	F54D10.2
WBGene00001702	grd-13	2.32578	1.01801e-12	261 - 564	41 - 94	29.6867	4.09	W05E7.3
WBGene00018297	F41F3.3	2.32397	1.27769e-07	1194 - 3001	153 - 400	166.063	18.5267	F41F3.3
WBGene00010505	K02D3.2	2.31933	4.62769e-07	40 - 99	5 - 10	3.35	0.323333	K02D3.2	STARD4,STARD5,STARD6	ENSG00000164211,ENSG00000172345,ENSG00000174448
WBGene00000755	col-182	2.31512	2.3766e-06	33 - 72	2 - 9	2.22667	0.186667	R09A8.4	C1QTNF2,C1QTNF7,ADIPOQ,OTOL1,C1QTNF9B,C1QTNF9	ENSG00000145861,ENSG00000163145,ENSG00000181092,ENSG00000182447,ENSG00000205863,ENSG00000240654
WBGene00020560	T19C3.2	2.31065	1.50044e-09	134 - 221	11 - 46	8.09667	1.14333	T19C3.2
WBGene00000623	col-46	2.30889	1.16183e-07	54 - 118	5 - 15	3.66333	0.366667	Y18H1A.13
WBGene00020590	T19H12.6	2.30539	8.6749e-07	53 - 68	2 - 13	1.02667	0.103333	T19H12.6	GGT6	ENSG00000167741
WBGene00001072	dpy-10	2.30455	2.43722e-23	1267 - 2097	220 - 407	43.5467	6.76333	T14B4.7
WBGene00000702	col-128	2.30312	4.66711e-08	76 - 205	10 - 27	4.00333	0.47	F12F6.9
WBGene00004236	ptr-22	2.30138	1.68e-17	190 - 231	27 - 41	3.08333	0.48	Y80D3A.7	PTCHD1,PTCHD3,PTCHD4	ENSG00000165186,ENSG00000182077,ENSG00000244694
WBGene00000256	bli-6	2.2947	1.79017e-06	37 - 207	9 - 12	4.60667	0.396667	Y73B6BL.34	MARCO	ENSG00000019169
WBGene00000667	col-92	2.29412	6.55329e-19	373 - 396	39 - 100	63.28	9.83	W05B2.6	SFTPD	ENSG00000133661
WBGene00014039	ZK662.2	2.29302	1.34027e-06	88 - 214	6 - 40	8.52667	0.863333	ZK662.2
WBGene00005016	sqt-1	2.29043	1.574e-05	2022 - 5119	111 - 564	148.373	10.34	B0491.2	COLQ	ENSG00000206561
WBGene00000656	col-80	2.28555	5.74772e-30	8735 - 14922	1618 - 2041	460.417	70.43	C09G5.5	SFTPD	ENSG00000133661
WBGene00020039	R12E2.14	2.28478	5.45327e-09	180 - 264	13 - 60	38.0433	4.94333	R12E2.14
WBGene00000597	col-8	2.28241	2.26246e-119	17769 - 21460	3157 - 3871	905.04	148.493	F11H8.3	SFTPD	ENSG00000133661
WBGene00001071	dpy-9	2.28178	1.02632e-06	561 - 1138	54 - 182	34.0267	3.63667	T21D12.2
WBGene00001714	grl-5	2.28131	1.90153e-05	271 - 523	11 - 63	19.44	1.30333	Y47D7A.5
WBGene00020040	R12E2.15	2.28099	1.16871e-09	192 - 280	14 - 62	42.92	5.84333	R12E2.15
WBGene00189961	Y54G2A.57	2.27797	2.78542e-07	48 - 62	6 - 7	1.65333	0.173333	Y54G2A.57
WBGene00000748	col-175	2.27794	3.00264e-05	8 - 167	2 - 7	3.77333	0.163333	C35B8.1	SFTPD	ENSG00000133661
WBGene00001719	grl-10	2.27679	2.14142e-11	182 - 247	14 - 42	8.97333	1.25667	C26F1.5
WBGene00018418	F44E2.4	2.27588	4.2352e-17	833 - 1213	94 - 274	9.95	1.53667	F44E2.4
WBGene00007868	C32H11.5	2.27457	4.52403e-06	47 - 88	1 - 14	3.98667	0.376667	C32H11.5
WBGene00021389	Y38A10A.2	2.27368	2.54798e-09	114 - 128	10 - 32	2.34	0.31	Y38A10A.2
WBGene00018573	oac-30	2.27336	1.79335e-07	47 - 71	6 - 10	1.24667	0.133333	F47F6.3
WBGene00016329	osr-1	2.26668	5.43848e-10	112 - 191	13 - 37	3.14667	0.43	C32E12.3
WBGene00007999	tag-297	2.26556	2.29913e-16	457 - 758	67 - 154	12.7533	1.94667	C38C6.6
WBGene00004123	pqn-36	2.26316	7.25974e-10	105 - 131	9 - 29	1.52	0.19	F39D8.1
WBGene00007170	B0393.5	2.26105	9.42549e-17	206 - 281	31 - 47	2.60333	0.4	B0393.5	NELL1,NELL2	ENSG00000165973,ENSG00000184613
WBGene00000653	col-77	2.25997	7.95151e-06	484 - 647	20 - 111	22.8567	2.00667	M195.1	MARCO	ENSG00000019169
WBGene00010267	lips-9	2.25466	8.54111e-09	107 - 234	13 - 41	6.85	0.91	F58G1.5
WBGene00013511	Y71A12B.15	2.24719	1.16374e-08	73 - 118	9 - 22	1.62333	0.183333	Y71A12B.15
WBGene00005018	sqt-3	2.23816	3.49653e-08	1785 - 3830	284 - 640	106.753	13.76	F23H12.4
WBGene00019306	K02E7.1	2.23767	9.30135e-06	29 - 45	2 - 5	3.38333	0.326667	K02E7.1
WBGene00000893	cyn-17	2.23542	3.81217e-07	87 - 184	6 - 36	2.9	0.343333	ZC250.1
WBGene00004998	spp-13	2.23219	1.04129e-07	94 - 162	7 - 36	10.0967	1.32333	F08F1.6
WBGene00043062	clec-80	2.23185	3.07526e-11	108 - 118	12 - 24	12.0833	1.70333	Y54G2A.39
WBGene00001730	grl-21	2.23029	3.58806e-08	233 - 310	16 - 80	17.44	2.31667	ZC168.5
WBGene00001066	dpy-4	2.22951	6.85863e-13	570 - 1222	91 - 237	37.5733	5.76333	Y41E3.2	MARCO	ENSG00000019169
WBGene00007210	agmo-1	2.22914	6.73966e-08	117 - 234	12 - 53	4.67	0.59	BE10.2	AGMO	ENSG00000187546
WBGene00017937	F30H5.3	2.22819	2.493e-07	59 - 119	5 - 16	0.67	0.0833333	F30H5.3	TFPI	ENSG00000003436
WBGene00012132	ifta-2	2.22661	1.4947e-05	28 - 37	2 - 3	1.69667	0.14	T28F3.6	IFT22	ENSG00000128581
WBGene00000602	col-13	2.22372	1.72961e-10	199 - 317	23 - 70	51.97	8.45	F15H10.2	MARCO	ENSG00000019169
WBGene00219216	K08D10.14	2.22359	1.92335e-14	213 - 228	24 - 57	10.22	1.52667	K08D10.14
WBGene00009515	clec-170	2.21866	1.0915e-08	92 - 125	8 - 28	2.87333	0.39	F38A1.1
WBGene00044623	bus-8	2.21479	8.87409e-13	444 - 816	65 - 181	12.48	1.91667	T23F2.1	ALG2	ENSG00000119523
WBGene00019717	trx-3	2.21177	2.49818e-12	176 - 185	19 - 49	11.21	1.65667	M01H9.1	NXNL2,NXN,NXNL1	ENSG00000130045,ENSG00000167693,ENSG00000171773
WBGene00004992	spp-7	2.20767	4.98484e-05	20 - 28	0 - 2	1.02333	0.06	ZK616.9
WBGene00000745	col-172	2.20128	1.2321e-11	144 - 232	19 - 40	7.39333	0.99	F38B6.5	MARCO	ENSG00000019169
WBGene00004394	rol-1	2.20123	7.96883e-05	6 - 61	0 - 1	0.873333	0.02	Y57A10A.11
WBGene00000734	col-161	2.19771	1.12242e-08	277 - 447	21 - 111	22.0267	3.12333	C50B6.4	SFTPD	ENSG00000133661
WBGene00011427	T04C12.1	2.19589	1.67253e-05	27 - 39	2 - 4	4.62667	0.286667	T04C12.1
WBGene00018547	clec-78	2.1932	9.67666e-12	304 - 492	40 - 122	1.55	0.236667	F47C12.2	JAG1,NOTCH3,NOTCH2,NOTCH1,DLL4,JAG2,DLL1,NOTCH4,NOTCH4,NOTCH4,NOTCH4	ENSG00000101384,ENSG00000074181,ENSG00000134250,ENSG00000148400,ENSG00000128917,ENSG00000184916,ENSG00000198719,ENSG00000204301,ENSG00000223355,ENSG00000234876,ENSG00000238196
WBGene00044109	K02E11.10	2.19153	1.04184e-05	42 - 164	5 - 26	3.78667	0.406667	K02E11.10
WBGene00018256	cutl-28	2.19133	4.29217e-08	64 - 102	8 - 15	1.48667	0.21	F41A4.1
WBGene00010032	F54B11.9	2.1901	1.03336e-05	33 - 59	1 - 8	2.36333	0.2	F54B11.9
WBGene00003104	mab-7	2.18949	2.71171e-08	125 - 200	9 - 43	5.4	0.736667	ZC13.4
WBGene00020881	T28A11.19	2.18386	5.17384e-07	46 - 69	5 - 11	3.65667	0.433333	T28A11.19
WBGene00018969	F56D3.1	2.18003	7.77831e-11	169 - 354	32 - 66	6.55667	1.04	F56D3.1
WBGene00009257	F29G6.1	2.17935	3.78978e-07	54 - 109	7 - 19	0.893333	0.12	F29G6.1	AGRN	ENSG00000188157
WBGene00000747	col-174	2.17161	6.44918e-06	42 - 91	3 - 14	2.00333	0.193333	F46C8.2	MARCO	ENSG00000019169
WBGene00014183	ZK1025.3	2.17075	6.58746e-05	421 - 1014	21 - 122	28.3533	1.95333	ZK1025.3
WBGene00018744	F53B3.6	2.17046	4.15843e-12	280 - 541	49 - 111	12.8233	1.99	F53B3.6
WBGene00000603	col-14	2.16801	3.1857e-05	621 - 1032	29 - 166	33.5767	2.98333	C46A5.3	COL17A1,MARCO	ENSG00000065618,ENSG00000019169
WBGene00004174	abu-14	2.16062	0.000103126	425 - 951	9 - 85	20.53	0.923333	ZK1067.7
WBGene00016106	itm-2	2.15659	1.00681e-13	228 - 312	31 - 72	7.93	1.28333	C25F6.7	ITM2C,ITM2A,ITM2B	ENSG00000135916,ENSG00000078596,ENSG00000136156
WBGene00004398	rol-8	2.15558	3.6597e-05	604 - 2042	66 - 247	52.79	4.82	ZK1290.3	MARCO	ENSG00000019169
WBGene00001074	dpy-13	2.15439	4.12466e-06	671 - 1940	105 - 269	56.5033	6.79333	F30B5.1	C1QTNF2,C1QTNF7,ADIPOQ,OTOL1,C1QTNF9B,C1QTNF9	ENSG00000145861,ENSG00000163145,ENSG00000181092,ENSG00000182447,ENSG00000205863,ENSG00000240654
WBGene00018468	tag-80	2.15292	6.1699e-15	289 - 413	38 - 78	2.67667	0.393333	F45E4.3	BSN,PCLO	ENSG00000164061,ENSG00000186472
WBGene00000698	col-124	2.15132	1.57033e-22	9927 - 21868	2557 - 2751	644.987	108.123	C24F3.6	SFTPD,BBC3	ENSG00000133661,ENSG00000105327
WBGene00017998	F33D4.6	2.15016	1.82861e-05	593 - 1284	55 - 214	18.3	1.95333	F33D4.6
WBGene00019759	M03F4.6	2.14995	1.4721e-10	158 - 277	23 - 57	6.12667	0.836667	M03F4.6
WBGene00044620	bus-4	2.14946	2.26443e-08	68 - 112	12 - 18	2.95	0.383333	T22B11.2	C1GALT1C1,C1GALT1C1L	ENSG00000171155,ENSG00000223658
WBGene00000746	col-173	2.149	6.25001e-09	134 - 301	21 - 57	7.90667	1.19	F41C6.5	MARCO	ENSG00000019169
WBGene00009205	F28C6.5	2.14803	9.76426e-08	83 - 130	8 - 28	5.3	0.75	F28C6.5
WBGene00000601	col-12	2.14507	7.35398e-10	287 - 394	27 - 106	60.7567	9.15667	F15H10.1	MARCO	ENSG00000019169
WBGene00005017	sqt-2	2.14341	6.41127e-05	1329 - 3529	95 - 454	104.867	8.52	C01B12.1	MARCO	ENSG00000019169
WBGene00022410	Y97E10C.1	2.14312	7.7758e-25	1102 - 1326	168 - 343	55.8433	9.53333	Y97E10C.1
WBGene00013352	lon-8	2.14034	4.56405e-12	464 - 690	51 - 172	34.9767	5.53667	Y59A8B.20
WBGene00010948	M195.2	2.13931	3.16065e-06	45 - 61	4 - 11	1.58	0.183333	M195.2
WBGene00000606	col-17	2.13891	6.03263e-05	882 - 3802	112 - 411	110.8	9	F11G11.10	NCOA5	ENSG00000124160
WBGene00000730	col-157	2.13533	2.25805e-06	73 - 325	14 - 53	10.83	1.35	T11F9.9	MARCO	ENSG00000019169
WBGene00019644	cpt-4	2.13452	1.29667e-10	315 - 339	31 - 106	5.68	0.916667	K11D12.4
WBGene00007883	C33A12.4	2.12995	9.93171e-12	236 - 286	24 - 79	28.1233	4.38667	C33A12.4
WBGene00000735	col-162	2.12924	8.24021e-10	185 - 337	22 - 70	16.06	2.57667	Y2H9A.3	SFTPD	ENSG00000133661
WBGene00022230	Y73B6A.3	2.12717	8.16441e-08	64 - 84	9 - 15	9.08667	1.38	Y73B6A.3
WBGene00015408	C03H5.6	2.12678	2.43688e-08	77 - 131	11 - 24	2.92333	0.443333	C03H5.6
WBGene00021083	W08E12.2	2.12106	4.92507e-05	31 - 60	1 - 9	4.76333	0.44	W08E12.2
WBGene00009926	noah-2	2.11919	5.95789e-07	1900 - 3649	279 - 724	45.2733	6.25	F52B11.3
WBGene00019497	K07E8.6	2.11869	2.15228e-05	26 - 48	3 - 5	1.34	0.15	K07E8.6
WBGene00002348	myo-1	2.1169	9.57625e-05	447 - 760	17 - 117	3.90333	0.3	R06C7.10	MYH7B,MYH13,MYH7,MYH1,MYH3,MYH2,MYH8,MYH15,MYH6,MYH4,MYO5C,MYO5B,MYO5A,MYH9,MYH14,MYH10,MYH11	ENSG00000078814,ENSG00000006788,ENSG00000092054,ENSG00000109061,ENSG00000109063,ENSG00000125414,ENSG00000133020,ENSG00000144821,ENSG00000197616,ENSG00000264424,ENSG00000128833,ENSG00000167306,ENSG00000197535,ENSG00000100345,ENSG00000105357,ENSG00000133026,ENSG00000133392
WBGene00020368	ast-1	2.1157	4.76075e-06	42 - 83	4 - 14	1.73667	0.21	T08H4.3	FLI1,ERG,FEV	ENSG00000151702,ENSG00000157554,ENSG00000163497
WBGene00004155	pqn-73	2.1108	2.81892e-11	116 - 158	20 - 29	1.80333	0.29	W01C9.3
WBGene00000618	col-41	2.10378	7.35398e-10	366 - 770	63 - 180	17.5733	2.84333	T10B10.1	SFTPD	ENSG00000133661
WBGene00021645	Y47G6A.19	2.10349	4.497e-19	573 - 669	85 - 185	14.8233	2.61333	Y47G6A.19	CPB1,CPA2,CPA6,CPA1,CPA4,CPA5,CPA3,CPB2,CPO	ENSG00000153002,ENSG00000158516,ENSG00000165078,ENSG00000091704,ENSG00000128510,ENSG00000158525,ENSG00000163751,ENSG00000080618,ENSG00000144410
WBGene00017193	F07C3.2	2.10344	9.58782e-09	108 - 153	13 - 34	10.14	1.56	F07C3.2
WBGene00022679	ZK180.5	2.10326	2.28095e-17	706 - 1156	129 - 260	21.2867	3.65667	ZK180.5
WBGene00020283	T06A4.3	2.10281	1.68114e-07	71 - 163	14 - 29	2.97333	0.41	T06A4.3	CPA2,CPA1,CPA4,CPB1,CPA5,CPA6,CPA3,CPB2,CPO	ENSG00000158516,ENSG00000091704,ENSG00000128510,ENSG00000153002,ENSG00000158525,ENSG00000165078,ENSG00000163751,ENSG00000080618,ENSG00000144410
WBGene00012635	Y38H8A.1	2.09659	1.94825e-13	172 - 187	22 - 45	7.90333	1.38	Y38H8A.1
WBGene00000781	cpr-1	2.09658	7.74645e-07	2509 - 4993	342 - 937	142.243	20.1267	C52E4.1	CTSB	ENSG00000164733
WBGene00007233	C01G10.6	2.09613	2.52898e-05	65 - 80	2 - 21	9.28333	1.03	C01G10.6
WBGene00017841	F26G1.5	2.09318	1.54029e-11	178 - 237	23 - 59	12.1833	2.11	F26G1.5
WBGene00018538	marg-1	2.09316	5.81538e-06	44 - 119	7 - 18	2.83	0.34	F47B7.7
WBGene00018645	F49F1.5	2.0878	1.93924e-07	134 - 188	12 - 54	14.5333	2.35667	F49F1.5
WBGene00000448	pros-1	2.08722	1.43335e-12	160 - 185	23 - 46	3.02667	0.496667	K12H4.1	PROX1,PROX2	ENSG00000117707,ENSG00000119608
WBGene00011594	T07G12.3	2.08703	8.25824e-06	45 - 50	3 - 11	0.963333	0.126667	T07G12.3
WBGene00006950	wrt-4	2.08657	2.92527e-06	67 - 225	13 - 41	3.24667	0.44	ZK678.5	DHH,IHH,SHH	ENSG00000139549,ENSG00000163501,ENSG00000164690
WBGene00000751	col-178	2.08464	4.35027e-72	18464 - 22511	3838 - 4282	1387.24	259.183	C34F6.2	MARCO	ENSG00000019169
WBGene00015117	B0294.1	2.08439	2.13752e-05	48 - 99	2 - 20	5.48333	0.656667	B0294.1
WBGene00013853	ZC116.1	2.08085	2.35604e-06	122 - 219	8 - 55	7.59667	1.09333	ZC116.1
WBGene00017471	F14H12.3	2.07784	6.19133e-11	238 - 402	34 - 93	15.4333	2.56	F14H12.3	ADGRB2,ADGRB3,ADGRB1	ENSG00000121753,ENSG00000135298,ENSG00000181790
WBGene00016962	C56C10.4	2.07435	3.08418e-06	42 - 67	6 - 10	2.87667	0.393333	C56C10.4
WBGene00004229	ptr-15	2.07387	6.45342e-08	71 - 131	14 - 24	1.52333	0.233333	T07H8.6	PTCHD1,PTCHD3,PTCHD4	ENSG00000165186,ENSG00000182077,ENSG00000244694
WBGene00001984	hog-1	2.0708	1.95282e-07	69 - 114	10 - 25	6.26333	0.876667	W06B11.4
WBGene00018487	F46C8.8	2.06362	1.64918e-08	134 - 271	24 - 62	7.90667	1.25	F46C8.8
WBGene00020846	T27A10.6	2.0594	1.80378e-14	421 - 792	93 - 166	8.55333	1.55	T27A10.6
WBGene00011266	idpb-5	2.05611	0.000211363	15 - 23	1 - 1	1.27667	0.06	R13H4.8	KRTAP5-5,KRTAP5-3,KRTAP5-11,KRTAP5-10,KRTAP5-6,KRTAP5-2,KRTAP5-1,KRTAP5-8,KRTAP5-4,KRTAP5-7	ENSG00000185940,ENSG00000196224,ENSG00000204571,ENSG00000204572,ENSG00000205864,ENSG00000205867,ENSG00000205869,ENSG00000241233,ENSG00000241598,ENSG00000244411
WBGene00011104	cut-5	2.05543	1.2974e-06	53 - 67	7 - 13	1.85667	0.226667	R07E3.3
WBGene00016924	C54F6.6	2.05436	0.000119104	27 - 32	1 - 6	1.56333	0.19	C54F6.6
WBGene00001863	him-4	2.05349	1.89602e-16	981 - 1164	111 - 309	6.48667	1.36333	F15G9.4	HMCN1,HMCN2,OBSL1,OBSCN,HSPG2,TTN,SPEG	ENSG00000143341,ENSG00000148357,ENSG00000124006,ENSG00000154358,ENSG00000142798,ENSG00000155657,ENSG00000072195
WBGene00016698	C46A5.1	2.04709	4.84788e-06	48 - 56	5 - 10	1.22	0.143333	C46A5.1	PTPN21,PTPN14	ENSG00000070778,ENSG00000152104
WBGene00004719	sad-1	2.04708	9.758e-13	169 - 246	33 - 53	2.64667	0.486667	F15A2.6	BRSK2,BRSK1,PRKAA1,PRKAA2	ENSG00000174672,ENSG00000160469,ENSG00000132356,ENSG00000162409
WBGene00012186	mlt-11	2.0461	9.23975e-07	1178 - 1989	142 - 449	8.83	1.30333	W01F3.3	SPINT3,TFPI2,SPINT1,SPINT2,MUC6	ENSG00000101446,ENSG00000105825,ENSG00000166145,ENSG00000167642,ENSG00000267748,ENSG00000277281
WBGene00010760	K10H10.4	2.04462	6.82688e-05	63 - 117	2 - 27	4.56333	0.5	K10H10.4
WBGene00000713	col-140	2.04359	7.84801e-84	43489 - 52665	9309 - 10675	2197.71	422.833	F26F12.1	SFTPD	ENSG00000133661
WBGene00000693	col-119	2.04265	2.63599e-93	48918 - 56805	9867 - 13352	2341.72	456.557	C53B4.5	SFTPD	ENSG00000133661
WBGene00001210	egl-46	2.04223	2.49109e-09	98 - 127	14 - 26	4.05667	0.653333	K11G9.4	INSM1,INSM2	ENSG00000173404,ENSG00000168348
WBGene00008448	E01G4.6	2.04124	1.29693e-05	38 - 217	13 - 19	1.68667	0.206667	E01G4.6
WBGene00023520	oig-5	2.03896	3.37534e-06	50 - 59	5 - 10	2.27667	0.31	Y57G11C.50
WBGene00007820	clec-199	2.03826	6.48197e-07	56 - 72	10 - 11	1.18667	0.153333	C30H6.1	KLRB1,KLRG1,KLRF1	ENSG00000111796,ENSG00000139187,ENSG00000150045
WBGene00006741	unc-1	2.03729	6.89012e-11	292 - 377	40 - 110	11.98	2.12	K03E6.5	NPHS2,STOML3,STOM	ENSG00000116218,ENSG00000133115,ENSG00000148175
WBGene00011107	R07E3.6	2.03693	1.94673e-11	170 - 294	36 - 62	3.03333	0.533333	R07E3.6
WBGene00002128	inx-6	2.03566	5.66819e-06	132 - 164	8 - 50	4.23	0.596667	C36H8.2
WBGene00016732	phat-1	2.03438	7.19623e-05	31 - 72	2 - 14	2.24	0.24	C46H11.8
WBGene00018380	decr-1.1	2.03393	8.42286e-05	31 - 61	1 - 10	5.03667	0.483333	F43C11.3
WBGene00020472	lips-11	2.03298	4.57209e-09	144 - 207	15 - 49	8.31333	1.42333	T13B5.5
WBGene00018824	F54E2.2	2.0325	0.000208664	19 - 28	0 - 3	1.78667	0.0966667	F54E2.2
WBGene00000039	acn-1	2.03097	6.67362e-13	1322 - 1883	204 - 567	19.8767	3.68333	C42D8.5	ACE2,ACE,TMEM27	ENSG00000130234,ENSG00000159640,ENSG00000264813,ENSG00000147003
WBGene00019855	R03H10.2	2.03052	2.0704e-13	262 - 391	48 - 97	9.92	1.81667	R03H10.2
WBGene00000445	ceh-22	2.02856	3.84134e-05	29 - 43	3 - 7	1.21667	0.143333	F29F11.5	NKX2-8,NKX2-5,NKX2-2	ENSG00000136327,ENSG00000183072,ENSG00000125820
WBGene00010674	K08E7.6	2.0238	0.000190149	37 - 59	0 - 12	2.14333	0.16	K08E7.6
WBGene00000034	abu-11	2.01839	0.000107011	23 - 54	3 - 5	1.13667	0.103333	T01D1.6
WBGene00000031	abu-8	2.01666	0.000277299	12 - 30	1 - 2	0.646667	0.0466667	C03A7.14
WBGene00017247	F08D12.3	2.01594	1.1426e-13	181 - 238	34 - 51	9.56	1.74667	F08D12.3
WBGene00010166	gmd-2	2.01513	0.000291247	14 - 34	0 - 3	0.823333	0.0466667	F56H6.5	GMDS	ENSG00000112699
WBGene00004300	ram-2	2.01439	1.24972e-05	1021 - 2887	198 - 473	83.2433	11.5767	F38A3.2	MARCO	ENSG00000019169
WBGene00016733	phat-2	2.01279	3.91355e-07	110 - 244	18 - 59	9.68333	1.55	C46H11.9
WBGene00006436	ttn-1	2.0117	8.95833e-11	783 - 1234	86 - 317	0.953333	0.166667	W06H8.8	TTN,MXRA5,IGSF10	ENSG00000155657,ENSG00000101825,ENSG00000152580
WBGene00015433	C04E12.2	2.00892	7.10525e-18	259 - 294	47 - 67	18.5033	3.32	C04E12.2
WBGene00004216	ptr-1	2.00861	1.33807e-13	359 - 365	44 - 117	4.73333	0.906667	C24B5.3	PTCHD1,PTCHD3,PTCHD4,PTCHD3	ENSG00000165186,ENSG00000182077,ENSG00000244694,ENSG00000276595
WBGene00003885	osm-5	2.00771	3.59991e-06	60 - 85	6 - 19	1.04667	0.146667	Y41G9A.1	IFT88	ENSG00000032742
WBGene00012346	W08G11.1	2.0077	0.000121292	36 - 57	1 - 12	1.46667	0.173333	W08G11.1
WBGene00014094	ZK829.3	2.00396	0.000192218	29 - 36	0 - 7	0.93	0.0766667	ZK829.3
WBGene00022504	mam-1	2.00362	2.90205e-07	67 - 93	9 - 17	1.16667	0.17	ZC13.3
WBGene00013588	nlp-42	2.00274	7.49391e-05	65 - 83	2 - 23	8.74667	0.96	Y80D3A.10
WBGene00009031	F21H7.5	1.99818	0.00022632	15 - 146	3 - 13	2.6	0.223333	F21H7.5
WBGene00016242	C30A5.10	1.99587	0.000191389	25 - 27	1 - 3	0.316667	0.02	C30A5.10
WBGene00011524	plpr-1	1.99553	6.36247e-08	81 - 149	17 - 29	3.16333	0.476667	T06D8.3	PLPPR5,PLPPR2,PLPPR4,PLPPR1,PLPPR1,PLPPR3	ENSG00000117598,ENSG00000105520,ENSG00000117600,ENSG00000148123,ENSG00000276539,ENSG00000129951
WBGene00044074	mltn-5	1.99372	0.000197912	24 - 28	1 - 3	0.48	0.04	W02B8.6
WBGene00044387	C27A2.8	1.99156	0.000184588	28 - 34	0 - 5	2.22333	0.21	C27A2.8
WBGene00020194	T03G6.1	1.99049	8.82385e-12	509 - 803	80 - 221	23.9367	4.35	T03G6.1
WBGene00017154	ugt-57	1.98988	2.51639e-11	203 - 251	25 - 67	4.80667	0.863333	F01E11.1
WBGene00000740	col-167	1.98741	1.95468e-05	621 - 1586	113 - 291	130.15	18.0533	T10E10.2	MARCO	ENSG00000019169
WBGene00006747	unc-7	1.9861	7.78055e-09	96 - 126	15 - 24	2.57333	0.423333	R07D5.1
WBGene00007657	pals-3	1.98555	2.49963e-07	73 - 88	11 - 18	2.84667	0.466667	C17H1.4
WBGene00017542	F17E9.5	1.98432	0.000340163	12 - 118	1 - 9	4.09667	0.296667	F17E9.5
WBGene00008292	C54C8.4	1.9829	4.35609e-05	27 - 66	5 - 8	1.61333	0.193333	C54C8.4
WBGene00006886	vap-1	1.97859	1.63779e-05	191 - 231	10 - 78	5.67333	0.866667	F11C7.3	CRISP3,R3HDML,CRISPLD2,CRISPLD1,CRISP2,CRISP1,PI15,GLIPR1,CLEC18B,CLEC18A,CLEC18C,PI16,GLIPR1L1,GLIPR1L2	ENSG00000096006,ENSG00000101074,ENSG00000103196,ENSG00000121005,ENSG00000124490,ENSG00000124812,ENSG00000137558,ENSG00000139278,ENSG00000140839,ENSG00000157322,ENSG00000157335,ENSG00000164530,ENSG00000173401,ENSG00000180481
WBGene00009983	cut-2	1.97846	1.22205e-08	360 - 783	54 - 187	28.7767	5.11	F53F1.5
WBGene00012595	Y38E10A.17	1.97547	0.000259811	12 - 96	3 - 6	0.993333	0.08	Y38E10A.17
WBGene00004397	rol-6	1.97431	0.000268843	1121 - 3002	92 - 454	76.26	7.27667	T01B7.7	COLQ	ENSG00000206561
WBGene00022038	Y65B4BL.6	1.97254	8.61639e-07	60 - 114	12 - 17	7.93	1.32	Y65B4BL.6
WBGene00012433	Y11D7A.9	1.97126	1.19242e-08	105 - 180	21 - 39	5.7	1.00333	Y11D7A.9
WBGene00019152	nspb-6	1.9707	0.000430255	17 - 31	0 - 4	3.38667	0.17	H04M03.2
WBGene00000720	col-147	1.97033	7.6023e-06	1897 - 3671	288 - 788	192.49	30.3433	T06E4.4	SFTPD	ENSG00000133661
WBGene00011838	T19C4.1	1.96925	9.96935e-10	263 - 299	33 - 99	8.46333	1.61333	T19C4.1
WBGene00021213	Y18H1A.9	1.96863	1.11472e-06	75 - 153	11 - 26	2.31	0.373333	Y18H1A.9	CPA2,CPA1,CPA4,CPB1,CPA5,CPA6,CPA3,CPB2,CPO	ENSG00000158516,ENSG00000091704,ENSG00000128510,ENSG00000153002,ENSG00000158525,ENSG00000165078,ENSG00000163751,ENSG00000080618,ENSG00000144410
WBGene00017592	F19C7.2	1.96833	7.54192e-22	437 - 570	77 - 140	12.0633	2.43333	F19C7.2	PRSS16	ENSG00000112812
WBGene00020478	T13C2.2	1.9657	6.90905e-07	64 - 94	9 - 20	1.96667	0.313333	T13C2.2
WBGene00016670	ilys-3	1.96318	0.000149218	24 - 40	1 - 6	3.39667	0.32	C45G7.3
WBGene00006818	unc-86	1.96228	2.69404e-07	110 - 148	13 - 41	3.52	0.633333	C30A5.7	POU4F3,POU4F1,POU4F2	ENSG00000091010,ENSG00000152192,ENSG00000151615
WBGene00008743	fcmt-1	1.96122	1.88165e-08	122 - 211	19 - 48	3.99333	0.713333	F13D12.9
WBGene00009958	madd-4	1.96115	5.67906e-10	227 - 349	37 - 97	4.53667	0.753333	F53B6.2	ADAMTSL3,ADAMTSL1,ADAMTSL4,ADAMTSL5,THSD4	ENSG00000156218,ENSG00000178031,ENSG00000143382,ENSG00000185761,ENSG00000187720
WBGene00003554	nas-38	1.95947	1.15455e-08	117 - 159	15 - 32	2.19333	0.393333	F57C12.1	MEP1A,MEP1B	ENSG00000112818,ENSG00000141434
WBGene00022274	Y73E7A.8	1.959	4.42538e-06	58 - 171	13 - 26	2.12333	0.34	Y73E7A.8
WBGene00011590	bus-19	1.95857	6.05069e-09	187 - 305	30 - 81	6.33667	1.16	T07F10.4	TMEM41A,TMEM41B	ENSG00000163900,ENSG00000166471
WBGene00003892	osm-12	1.95672	3.70257e-05	36 - 65	3 - 11	1.00667	0.123333	Y75B8A.12	BBS7	ENSG00000138686
WBGene00011530	T06D8.10	1.95229	6.98479e-10	277 - 443	42 - 123	3.1	0.583333	T06D8.10
WBGene00008816	F14F8.8	1.94996	0.000526872	15 - 21	0 - 2	3.21667	0.07	F14F8.8
WBGene00000689	col-115	1.94995	1.90033e-05	41 - 78	5 - 16	2.08	0.293333	Y42H9B.1
WBGene00001475	fmi-1	1.9469	7.67463e-21	831 - 980	126 - 249	4.34	0.856667	F15B9.7	CELSR1,CELSR3,CELSR2	ENSG00000075275,ENSG00000008300,ENSG00000143126
WBGene00000752	col-179	1.9457	2.92967e-15	2071 - 3328	366 - 875	182.02	36.71	C34F6.3	MARCO	ENSG00000019169
WBGene00001429	fkb-4	1.94468	8.67314e-07	122 - 183	12 - 52	6.48	1.1	ZC455.10	FKBP9,FKBP10,FKBP11	ENSG00000122642,ENSG00000141756,ENSG00000134285
WBGene00016505	ttr-33	1.94236	9.02369e-12	453 - 494	61 - 169	34.6367	6.71667	C37C3.13
WBGene00015545	C06G1.1	1.94007	2.16637e-12	294 - 475	62 - 120	7.69667	1.5	C06G1.1
WBGene00000399	cdh-7	1.93198	4.30313e-07	101 - 287	25 - 50	1.85667	0.323333	R05H10.6	PCDH15,PCDHB5,PCDHGA8,PCDHGB2,PCDHGB7,PCDHGA3,PCDHGB3	ENSG00000150275,ENSG00000113209,ENSG00000253767,ENSG00000253910,ENSG00000254122,ENSG00000254245,ENSG00000262209
WBGene00000655	col-79	1.93124	0.000473946	23 - 27	0 - 5	1.15667	0.0933333	C09G5.3	SFTPD	ENSG00000133661
WBGene00003175	mec-12	1.92429	2.58694e-22	894 - 1277	223 - 253	27.88	5.69	C44B11.3	TUBA1B,TUBA1A,TUBA1C,TUBA4A,TUBA3D,TUBA3E,TUBA3C,TUBA4B,TUBAL3,TUBA8	ENSG00000123416,ENSG00000167552,ENSG00000167553,ENSG00000127824,ENSG00000075886,ENSG00000152086,ENSG00000198033,ENSG00000243910,ENSG00000178462,ENSG00000183785,ENSG00000214391
WBGene00011018	R05A10.1	1.92271	2.30715e-06	59 - 74	9 - 18	2.40667	0.373333	R05A10.1
WBGene00007560	C14A4.9	1.92098	0.000640446	154 - 255	2 - 32	16.2867	0.903333	C14A4.9
WBGene00017376	F11C7.2	1.92001	0.000168146	44 - 70	2 - 17	5.15667	0.593333	F11C7.2
WBGene00008245	fipr-10	1.9199	0.000106152	31 - 42	3 - 9	7.4	1.13667	C50H2.12
WBGene00007682	C18D11.6	1.91883	7.18839e-09	100 - 129	21 - 26	15.87	2.69	C18D11.6
WBGene00015748	C14A11.2	1.9182	2.88421e-06	56 - 64	9 - 13	2.62667	0.436667	C14A11.2
WBGene00000717	col-144	1.91572	0.000107442	585 - 2057	137 - 318	225.66	29.28	B0222.6	SFTPD	ENSG00000133661
WBGene00001608	R07B1.8	1.91538	0.000106772	26 - 49	5 - 6	1.10333	0.143333	R07B1.8
WBGene00021805	nspg-7.2	1.9151	1.23195e-05	45 - 86	7 - 15	3.63333	0.516667	Y53G8AM.5
WBGene00007584	C14C10.1	1.914	0.000649137	7 - 61	1 - 2	1.18	0.0666667	C14C10.1	SLC25A3	ENSG00000075415
WBGene00012917	Y46G5A.29	1.91215	2.55833e-06	76 - 160	14 - 37	1.89333	0.33	Y46G5A.29
WBGene00011545	T06G6.3	1.91155	8.76985e-05	35 - 39	3 - 7	0.83	0.11	T06G6.3
WBGene00009968	fig-1	1.90995	4.77382e-10	182 - 215	23 - 54	2.75333	0.43	F53B7.5
WBGene00001076	dpy-17	1.90988	7.54898e-07	3647 - 4226	445 - 1301	146.37	26.1767	F54D8.1	COLQ	ENSG00000206561
WBGene00001725	grl-16	1.90963	1.09197e-11	387 - 589	72 - 168	12.32	2.45	Y65B4BR.6
WBGene00003057	lon-3	1.90782	0.00055758	312 - 856	21 - 122	22.0533	1.91667	ZK836.1	COLQ	ENSG00000206561
WBGene00002067	ifp-1	1.9074	1.63543e-17	459 - 691	113 - 163	9.19333	1.90333	C43C3.1	LMNB2	ENSG00000176619
WBGene00000490	che-11	1.90694	1.37048e-05	80 - 87	4 - 27	0.736667	0.126667	C27A7.4	IFT140	ENSG00000187535
WBGene00003768	nlp-30	1.90611	6.92873e-09	93 - 120	19 - 25	6.43667	1.18667	B0213.5
WBGene00018965	F56D2.3	1.90593	3.15778e-08	248 - 318	30 - 106	7.7	1.47333	F56D2.3
WBGene00021703	cpt-3	1.90476	2.932e-16	341 - 419	73 - 91	6.73	1.32333	Y48G9A.10
WBGene00022612	ZC449.2	1.90252	3.86116e-07	72 - 101	12 - 21	2.34	0.386667	ZC449.2
WBGene00010893	cutl-9	1.9012	3.33545e-08	93 - 114	15 - 24	2.07667	0.343333	M28.1
WBGene00018706	F52F10.2	1.90107	7.85585e-05	43 - 86	3 - 19	1.42333	0.203333	F52F10.2	MFSD8	ENSG00000164073
WBGene00000733	col-160	1.89834	4.51644e-24	8340 - 12660	1958 - 2479	456.337	93.5267	F57B1.4	MARCO	ENSG00000019169
WBGene00015300	C01F1.5	1.89766	3.20138e-05	38 - 101	8 - 18	2.87333	0.403333	C01F1.5
WBGene00019212	zmp-2	1.89415	1.78125e-06	88 - 255	25 - 53	3.84333	0.636667	H19M22.3	MMP21,ELSPBP1,MMP23B	ENSG00000154485,ENSG00000169393,ENSG00000189409
WBGene00022713	ZK355.3	1.89414	0.000246496	25 - 41	3 - 6	2.55667	0.306667	ZK355.3
WBGene00020878	T28A11.16	1.89307	1.27932e-07	95 - 110	12 - 29	6.11333	1.02333	T28A11.16
WBGene00010705	cyp-14A1	1.89111	5.64435e-07	86 - 135	12 - 34	3.02	0.533333	K09A11.2	CYP2J2,CYP2U1,CYP2D6,CYP2R1,CYP2D7,CYP2W1,CYP2D6,CYP2C18,CYP2C9,CYP2C8,CYP2C19,CYP2B6	ENSG00000134716,ENSG00000155016,ENSG00000100197,ENSG00000186104,ENSG00000205702,ENSG00000073067,ENSG00000275211,ENSG00000108242,ENSG00000138109,ENSG00000138115,ENSG00000165841,ENSG00000197408
WBGene00016596	C42D4.3	1.89075	1.1985e-09	488 - 622	63 - 204	26.2267	5.19667	C42D4.3
WBGene00010714	mam-3	1.88956	1.94811e-06	100 - 171	10 - 42	2.37	0.4	K09B11.10
WBGene00006820	unc-89	1.88914	8.00132e-21	2143 - 2609	334 - 684	7.65	1.6	C09D1.1	OBSCN,OBSL1,TTN,HSPG2,HMCN1,HMCN2,MXRA5,IGSF10,SPEG	ENSG00000154358,ENSG00000124006,ENSG00000155657,ENSG00000142798,ENSG00000143341,ENSG00000148357,ENSG00000101825,ENSG00000152580,ENSG00000072195
WBGene00000903	daf-7	1.8879	2.28112e-05	158 - 216	12 - 72	4.38333	0.723333	B0412.2	GDF11,MSTN,INHBA,INHBB	ENSG00000135414,ENSG00000138379,ENSG00000122641,ENSG00000163083
WBGene00016196	C28H8.5	1.88699	1.62137e-05	57 - 79	6 - 22	3.05	0.5	C28H8.5	THAP4,THAP3,THAP1,THAP8,THAP2,THAP5	ENSG00000176946,ENSG00000041988,ENSG00000131931,ENSG00000161277,ENSG00000173451,ENSG00000177683,ENSG00000258064
WBGene00219208	B0365.9	1.88637	6.41666e-09	149 - 182	24 - 56	8.83333	1.76	B0365.9
WBGene00000750	col-177	1.8831	0.000192218	28 - 43	2 - 7	0.986667	0.126667	F59F3.2	COL17A1	ENSG00000065618
WBGene00015781	rml-3	1.88203	1.4871e-12	644 - 809	101 - 264	44.1867	9.16333	C14F11.6
WBGene00006534	tba-8	1.87957	2.46909e-07	106 - 277	32 - 44	4.95667	0.89	ZK899.4	TUBAL3,TUBA1B,TUBA4A,TUBA1A,TUBA1C,TUBA3D,TUBA3E,TUBA3C,TUBA8	ENSG00000178462,ENSG00000123416,ENSG00000127824,ENSG00000167552,ENSG00000167553,ENSG00000075886,ENSG00000152086,ENSG00000198033,ENSG00000183785,ENSG00000214391
WBGene00044260	Y87G2A.19	1.87926	7.76377e-05	138 - 211	8 - 67	12.2267	1.92333	Y87G2A.19	LITAF	ENSG00000189067
WBGene00007544	fipr-6	1.87692	0.000574238	25 - 62	1 - 13	9.33333	0.71	C12D8.17
WBGene00022517	ZC123.1	1.87543	1.36559e-08	127 - 203	26 - 53	2.85	0.56	ZC123.1
WBGene00018295	oac-29	1.87462	0.000562008	36 - 72	1 - 18	1.15667	0.113333	F41E6.14
WBGene00007537	fipr-8	1.87354	0.00070717	17 - 23	1 - 2	5.25333	0.15	C12D8.6
WBGene00001625	glt-7	1.87336	0.000222253	27 - 43	2 - 8	0.85	0.11	W03G1.1	SLC1A2	ENSG00000110436
WBGene00018515	F46G11.2	1.87239	3.73668e-06	61 - 128	13 - 20	2.79667	0.466667	F46G11.2
WBGene00013969	tep-1	1.87067	7.40651e-46	3659 - 3980	742 - 1052	32.3933	7.01667	ZK337.1	CD109	ENSG00000156535
WBGene00000681	col-107	1.87059	9.32501e-11	624 - 1330	154 - 326	45.3933	9.29	C34H4.4	SFTPD	ENSG00000133661
WBGene00000599	col-10	1.86982	0.000128983	1219 - 3971	275 - 684	397.02	56.7067	B0222.8	SFTPD	ENSG00000133661
WBGene00013891	ZC434.3	1.86804	1.6033e-05	98 - 185	13 - 56	6.77667	1.13333	ZC434.3
WBGene00021731	Y49G5A.1	1.86619	2.23566e-06	210 - 393	25 - 112	20.8433	3.88333	Y49G5A.1
WBGene00000484	che-2	1.86607	0.000222004	35 - 45	1 - 10	0.64	0.09	F38G1.1	IFT80,TRIM59	ENSG00000068885,ENSG00000248710,ENSG00000213186
WBGene00006535	tba-9	1.8613	3.02342e-07	98 - 109	12 - 33	2.58333	0.513333	F40F4.5	TUBA1B,TUBA8,TUBA4A,TUBA1A,TUBA1C,TUBAL3,TUBA3D,TUBA3E,TUBA3C	ENSG00000123416,ENSG00000183785,ENSG00000127824,ENSG00000167552,ENSG00000167553,ENSG00000178462,ENSG00000075886,ENSG00000152086,ENSG00000198033,ENSG00000214391
WBGene00015356	tag-278	1.8606	1.50245e-29	1011 - 1071	180 - 294	11.2833	2.45	C02F12.7	FAM184A,FAM184B	ENSG00000111879,ENSG00000047662
WBGene00018345	F42C5.3	1.85821	5.10642e-06	72 - 95	9 - 20	3.72	0.656667	F42C5.3
WBGene00044016	C35A5.10	1.85792	0.000571005	28 - 41	0 - 9	1.47667	0.18	C35A5.10
WBGene00011254	R12G8.1	1.85442	0.000749669	21 - 35	0 - 6	1.98333	0.193333	R12G8.1
WBGene00019532	K08D10.9	1.85385	0.000121826	31 - 53	4 - 11	0.966667	0.106667	K08D10.9
WBGene00002090	ins-7	1.85239	4.33691e-09	324 - 447	49 - 144	51.0467	10.2467	ZK1251.2
WBGene00021326	Y34B4A.10	1.85207	7.15031e-08	163 - 325	36 - 83	5.86333	1.16333	Y34B4A.10
WBGene00044174	fipr-5	1.85192	0.000579649	38 - 47	1 - 14	6.14667	0.77	C12D8.18
WBGene00006449	alg-4	1.84981	0.000650401	15 - 93	2 - 12	0.61	0.06	ZK757.3
WBGene00008290	bgnt-1.8	1.84981	0.00107022	6 - 35	0 - 3	0.813333	0.0333333	C54C8.2	B4GAT1	ENSG00000174684
WBGene00020105	R148.7	1.84935	8.02129e-05	58 - 70	5 - 23	3.52667	0.55	R148.7
WBGene00000718	col-145	1.84768	0.000105243	83 - 238	9 - 63	8.56667	1.37	B0222.7	SFTPD	ENSG00000133661
WBGene00007925	C34C12.6	1.84672	4.20112e-13	255 - 336	50 - 91	9.32	1.95333	C34C12.6
WBGene00004281	rab-28	1.84534	9.43852e-05	30 - 48	6 - 8	1.91667	0.343333	Y11D7A.4	RAB28	ENSG00000157869
WBGene00015857	C16D9.1	1.84017	3.23542e-05	136 - 185	11 - 69	5.09	0.9	C16D9.1
WBGene00000704	col-130	1.83978	2.67974e-08	231 - 565	65 - 124	17.6533	3.54333	F08G5.4	SFTPD	ENSG00000133661
WBGene00017983	F32D1.3	1.83902	2.96496e-08	108 - 130	19 - 38	1.97333	0.376667	F32D1.3	TMTC2	ENSG00000179104
WBGene00016005	ift-74	1.83841	2.5106e-05	51 - 68	6 - 15	0.97	0.163333	C18H9.8	IFT74	ENSG00000096872
WBGene00001552	gcy-32	1.83834	0.000205174	34 - 39	3 - 10	0.71	0.1	C06B3.8	GUCY1B3	ENSG00000061918,ENSG00000123201
WBGene00003515	myo-3	1.83762	1.12663e-19	2146 - 2993	433 - 815	17.4	3.77333	K12F2.1	MYH7B,MYH7,MYH1,MYH3,MYH2,MYH8,MYH6,MYH13,MYH15,MYH4,MYO5C,MYO5B,MYO5A,MYH9,MYH14,MYH10,MYH11	ENSG00000078814,ENSG00000092054,ENSG00000109061,ENSG00000109063,ENSG00000125414,ENSG00000133020,ENSG00000197616,ENSG00000006788,ENSG00000144821,ENSG00000264424,ENSG00000128833,ENSG00000167306,ENSG00000197535,ENSG00000100345,ENSG00000105357,ENSG00000133026,ENSG00000133392
WBGene00002116	ins-33	1.83747	4.95681e-05	67 - 107	7 - 30	7.40333	1.28333	W09C5.4
WBGene00012322	W07A12.4	1.83716	1.06127e-07	101 - 107	16 - 33	2.85667	0.526667	W07A12.4	BTBD17,LGALS3BP	ENSG00000204347,ENSG00000108679
WBGene00189995	C06E7.88	1.83471	0.000318489	20 - 64	4 - 7	2.55667	0.33	C06E7.88
WBGene00014046	clec-60	1.83222	4.15865e-07	90 - 220	26 - 37	4.62667	0.843333	ZK666.6
WBGene00003764	nlp-26	1.82976	9.64823e-13	184 - 212	41 - 53	34.15	7.29	Y43F8C.2
WBGene00011454	lron-14	1.82915	1.62865e-05	59 - 61	7 - 18	1.50667	0.286667	T05A1.3	CHADL,VASN	ENSG00000100399,ENSG00000168140
WBGene00016598	C42D4.13	1.82778	0.000668788	47 - 56	0 - 17	3.19667	0.396667	C42D4.13
WBGene00010446	K01A6.4	1.82601	0.000450327	24 - 32	3 - 4	1.18	0.14	K01A6.4
WBGene00001699	grd-10	1.82486	7.90492e-10	176 - 245	36 - 72	18.2833	3.88333	F09D12.1
WBGene00007817	idpp-14	1.82	6.03535e-05	58 - 104	6 - 25	1.77667	0.27	C30F2.3
WBGene00000699	col-125	1.81987	2.47119e-05	937 - 2245	201 - 486	80.8833	14.4533	C29F4.1	MARCO	ENSG00000019169
WBGene00006952	wrt-6	1.81962	6.25001e-09	156 - 199	29 - 63	3.51667	0.7	ZK377.1	DHH,IHH,SHH	ENSG00000139549,ENSG00000163501,ENSG00000164690
WBGene00007806	clec-230	1.81666	0.000601001	66 - 75	1 - 26	5.21333	0.66	C29F3.5
WBGene00004127	abu-12	1.81358	1.51465e-05	72 - 141	13 - 40	1.56667	0.29	F52D1.3
WBGene00044070	set-18	1.81284	3.59163e-12	455 - 551	75 - 187	12.1933	2.65	T22A3.4	SMYD3,SMYD1,SMYD2	ENSG00000185420,ENSG00000115593,ENSG00000143499
WBGene00003525	nas-6	1.81134	0.000613862	19 - 35	2 - 5	1.22667	0.123333	4R79.1	MEP1A,MEP1B,ASTL	ENSG00000112818,ENSG00000141434,ENSG00000188886
WBGene00044662	F26G1.9	1.81064	0.00100185	16 - 32	1 - 3	1.70667	0.143333	F26G1.9
WBGene00015865	C16E9.1	1.81058	2.13772e-07	86 - 132	22 - 26	2.7	0.496667	C16E9.1	MATN1,MATN2	ENSG00000162510,ENSG00000132561
WBGene00001068	dpy-6	1.81036	7.54283e-08	228 - 445	44 - 127	3.54	0.743333	F16F9.2	MUC4,MUC16,MUC12,VWF,MUC5B,OTOGL,MUC17,MUC6,OTOG,SSPO	ENSG00000145113,ENSG00000181143,ENSG00000205277,ENSG00000110799,ENSG00000117983,ENSG00000165899,ENSG00000169876,ENSG00000184956,ENSG00000188162,ENSG00000197558,ENSG00000198788,ENSG00000205592
WBGene00008760	F13E9.11	1.80861	5.87092e-27	558 - 576	121 - 156	14.82	3.33	F13E9.11
WBGene00016817	C50E3.6	1.80811	2.89089e-06	84 - 93	10 - 30	2.91667	0.543333	C50E3.6
WBGene00006052	ssq-3	1.80686	0.00139271	4 - 83	0 - 4	1.56	0.04	ZC477.1	ELN	ENSG00000049540
WBGene00021398	Y38C1AA.7	1.80367	0.00124678	10 - 137	2 - 15	4.97333	0.376667	Y38C1AA.7
WBGene00017036	D1069.1	1.80161	0.00144667	15 - 21	0 - 2	0.446667	0	D1069.1
WBGene00013290	Y57G11A.2	1.80063	0.00114408	14 - 129	1 - 16	1.42	0.15	Y57G11A.2	VMO1	ENSG00000182853
WBGene00011698	cyp-34A1	1.80031	2.45863e-05	87 - 143	9 - 43	2.84667	0.54	T10H4.10		ENSG00000198251,ENSG00000213908
WBGene00015359	C02G6.1	1.79703	1.0613e-05	54 - 72	9 - 19	0.79	0.15	C02G6.1	IDE,NRDC	ENSG00000119912,ENSG00000078618
WBGene00044212	Y68A4A.13	1.79691	1.25549e-12	233 - 271	46 - 68	32.77	6.88333	Y68A4A.13
WBGene00021625	Y47D7A.13	1.79371	6.25001e-09	503 - 1056	122 - 285	31.8967	6.92333	Y47D7A.13
WBGene00001707	grh-1	1.79257	4.77697e-11	210 - 332	52 - 82	8.29333	2.00667	Y48G8AR.1	GRHL2,GRHL1,GRHL3	ENSG00000083307,ENSG00000134317,ENSG00000158055
WBGene00000663	col-88	1.79186	0.000162253	32 - 65	5 - 9	2.04667	0.3	W05G11.3	SFTPD	ENSG00000133661
WBGene00010349	dyf-18	1.79172	0.00114209	14 - 31	2 - 3	0.9	0.0933333	H01G02.2	CDK20	ENSG00000156345
WBGene00021579	clec-73	1.79106	0.000413856	32 - 88	4 - 18	1.20667	0.17	Y46C8AL.1
WBGene00008102	C44H9.7	1.79083	3.3199e-06	63 - 82	13 - 17	2.22333	0.476667	C44H9.7
WBGene00007141	pitr-4	1.79034	0.000509157	23 - 39	3 - 8	0.78	0.08	B0331.2	SLC20A1,SLC20A2	ENSG00000144136,ENSG00000168575
WBGene00043981	aaim-1	1.7882	0.000900947	25 - 40	1 - 9	0.84	0.0966667	T14E8.4
WBGene00013771	Y113G7C.1	1.78398	0.00105617	14 - 73	3 - 7	0.316667	0.03	Y113G7C.1
WBGene00015546	cpg-19	1.78363	0.000277334	34 - 54	3 - 14	2.30333	0.366667	C06G1.2
WBGene00003171	mec-7	1.78243	5.47536e-26	967 - 1243	243 - 332	29.1767	6.72	ZK154.3	TUBB2B,TUBB6,TUBB4B,TUBB2A,TUBB3,TUBB,TUBB4A,TUBB,TUBB,TUBB,TUBB,TUBB,TUBB,TUBB,TUBB1	ENSG00000137285,ENSG00000198211,ENSG00000176014,ENSG00000188229,ENSG00000137267,ENSG00000258947,ENSG00000196230,ENSG00000104833,ENSG00000183311,ENSG00000224156,ENSG00000227739,ENSG00000229684,ENSG00000232421,ENSG00000232575,ENSG00000235067,ENSG00000101162,ENSG00000127589,ENSG00000159247,ENSG00000173213,ENSG00000173876
WBGene00020497	T14A8.2	1.78119	7.05569e-09	193 - 346	41 - 82	17.8533	3.71	T14A8.2
WBGene00020394	T10B5.8	1.77917	9.71327e-09	254 - 268	34 - 103	7.37333	1.56667	T10B5.8
WBGene00018031	F35B3.4	1.77849	9.03717e-07	165 - 258	22 - 78	10.1433	2.11333	F35B3.4
WBGene00015019	B0205.4	1.77704	0.000229609	32 - 52	5 - 13	1.34333	0.193333	B0205.4	FUT1,FUT2	ENSG00000174951,ENSG00000176920
WBGene00015103	B0280.7	1.77683	3.76778e-05	49 - 92	10 - 22	2.42667	0.443333	B0280.7
WBGene00020873	T28A11.6	1.77609	0.00154031	20 - 35	0 - 6	1.66667	0.08	T28A11.6
WBGene00220261	ZC434.10	1.7743	0.000930315	23 - 47	1 - 10	1.77667	0.18	ZC434.10
WBGene00007149	B0334.13	1.77379	0.000411513	29 - 42	4 - 8	3.02667	0.443333	B0334.13
WBGene00001067	dpy-5	1.77336	0.00177079	2786 - 6888	98 - 883	240.517	16.3667	F27C1.8	SFTPD	ENSG00000133661
WBGene00022033	Y65B4BL.1	1.77262	5.7982e-11	578 - 760	107 - 265	25.5933	6.19333	Y65B4BL.1
WBGene00012123	T28D6.3	1.77225	6.42195e-07	248 - 338	31 - 127	28.9833	6.19	T28D6.3
WBGene00015954	C18B2.3	1.77141	6.6347e-15	498 - 710	117 - 202	18.5567	4.16333	C18B2.3
WBGene00000691	col-117	1.77082	3.64084e-05	75 - 179	13 - 37	236.377	46.2867	T28C6.4	MARCO	ENSG00000019169
WBGene00012254	W04E12.9	1.77056	0.001775	14 - 18	0 - 2	0.916667	0.07	W04E12.9
WBGene00015934	ceh-48	1.76888	3.21769e-08	106 - 127	23 - 28	2.56333	0.533333	C17H12.9	ONECUT2,ONECUT1,ONECUT3	ENSG00000119547,ENSG00000169856,ENSG00000205922
WBGene00002827	let-653	1.76853	8.2849e-11	775 - 904	124 - 349	13.8267	3.02	C29E6.1	MUC3A	ENSG00000169894
WBGene00019963	rips-1	1.768	4.56996e-07	180 - 281	29 - 88	3.76333	0.786667	R08E5.3
WBGene00000678	col-104	1.7666	0.00181754	329 - 709	11 - 102	25.0067	1.94333	F58F6.1	C1QTNF2,C1QTNF7,ADIPOQ,OTOL1,C1QTNF9B,C1QTNF9	ENSG00000145861,ENSG00000163145,ENSG00000181092,ENSG00000182447,ENSG00000205863,ENSG00000240654
WBGene00006807	unc-75	1.76471	4.11234e-05	45 - 60	9 - 14	1.10667	0.21	C17D12.2	CELF4,CELF5,CELF6,CELF3,CELF2,CELF1	ENSG00000101489,ENSG00000161082,ENSG00000140488,ENSG00000159409,ENSG00000048740,ENSG00000149187,ENSG00000273025
WBGene00000476	cfi-1	1.76451	1.68767e-08	159 - 179	24 - 61	4.62	0.963333	T23D8.8	ARID3A,ARID3B,ARID3C	ENSG00000116017,ENSG00000179361,ENSG00000205143
WBGene00000753	col-180	1.76405	0.00106496	423 - 1378	64 - 251	41.4533	5.38	C44C10.1	MARCO	ENSG00000019169
WBGene00006642	tsp-16	1.76184	0.000721619	29 - 36	1 - 8	1.34	0.19	F01E11.4
WBGene00015620	C08G9.2	1.76158	1.17652e-05	63 - 95	10 - 19	0.443333	0.0766667	C08G9.2
WBGene00014184	ZK1025.4	1.75668	0.0019561	10 - 20	0 - 2	0.663333	0.05	ZK1025.4
WBGene00011880	T21B6.3	1.7565	7.34136e-11	208 - 328	61 - 67	3.80667	0.84	T21B6.3	CFP	ENSG00000126759
WBGene00022287	Y75B7AR.1	1.7563	0.00194656	62 - 274	4 - 31	14.7233	1	Y75B7AR.1
WBGene00002393	lpr-1	1.7555	1.04706e-06	77 - 110	18 - 22	5.5	1.06667	Y65B4BR.2
WBGene00019111	F59E11.5	1.75528	1.56156e-08	158 - 179	28 - 62	8.57667	1.85667	F59E11.5
WBGene00017835	F26F12.4	1.75369	6.98007e-05	45 - 51	7 - 12	2.56	0.433333	F26F12.4
WBGene00011726	lpr-2	1.75327	1.4578e-10	150 - 184	31 - 45	1.89333	0.42	T12A7.5
WBGene00011161	chil-18	1.75326	0.000441496	30 - 41	4 - 7	1.02333	0.146667	R09D1.5
WBGene00008963	F19H8.2	1.75256	1.74633e-14	328 - 467	83 - 114	16.4233	3.69333	F19H8.2
WBGene00002282	let-4	1.74845	2.94249e-07	619 - 741	84 - 316	11.17	2.46	C44H4.2	CHAD,LRRC70,TRIL,GP1BA	ENSG00000136457,ENSG00000186105,ENSG00000255690,ENSG00000185245
WBGene00007823	C30H6.5	1.74816	0.000606518	31 - 40	3 - 11	0.776667	0.123333	C30H6.5
WBGene00000649	col-73	1.7459	0.00211084	705 - 2714	36 - 307	92.1933	6.10667	F11G11.12	MARCO	ENSG00000019169
WBGene00010335	F59F3.6	1.7446	0.000587138	31 - 43	2 - 11	2.43	0.39	F59F3.6
WBGene00006789	unc-54	1.74397	9.03049e-35	19686 - 21153	4215 - 5982	131.103	30.9133	F11C3.3	MYH7B,MYH7,MYH1,MYH3,MYH2,MYH8,MYH6,MYH13,MYH15,MYH4,MYO5C,MYO5B,MYO5A,MYH9,MYH14,MYH10,MYH11	ENSG00000078814,ENSG00000092054,ENSG00000109061,ENSG00000109063,ENSG00000125414,ENSG00000133020,ENSG00000197616,ENSG00000006788,ENSG00000144821,ENSG00000264424,ENSG00000128833,ENSG00000167306,ENSG00000197535,ENSG00000100345,ENSG00000105357,ENSG00000133026,ENSG00000133392
WBGene00007604	xbx-9	1.74383	8.62566e-07	107 - 133	16 - 42	3.34667	0.703333	C15C8.1
WBGene00022283	lgc-27	1.74379	5.10362e-12	258 - 305	51 - 97	8.18	1.83333	Y74E4A.1
WBGene00010216	F57G8.7	1.74376	2.51054e-05	78 - 131	11 - 41	12.2033	2.44667	F57G8.7
WBGene00002123	inx-1	1.74319	2.71171e-08	185 - 291	39 - 86	3.68	0.78	C16E9.4
WBGene00018472	nep-16	1.7427	0.000413856	30 - 42	3 - 8	0.643333	0.116667	F45E4.7
WBGene00009986	F53F4.2	1.74243	0.00213244	14 - 17	0 - 2	1.76333	0.126667	F53F4.2
WBGene00016180	C28C12.4	1.74061	0.0019376	331 - 382	10 - 91	19.08	1.88	C28C12.4
WBGene00006208	str-163	1.73982	0.00157062	13 - 33	2 - 4	0.83	0.09	Y9C9A.3
WBGene00007131	pals-26	1.7373	2.95086e-08	112 - 159	25 - 45	3.19	0.703333	B0284.1
WBGene00001612	glr-1	1.73681	0.000187513	38 - 62	5 - 13	0.646667	0.1	C06E1.4	GRIA3,GRIA2,GRIA4,GRIA1,GRIK3,GRIK2,GRIK1	ENSG00000125675,ENSG00000120251,ENSG00000152578,ENSG00000155511,ENSG00000163873,ENSG00000164418,ENSG00000171189
WBGene00044701	AH9.6	1.73466	0.000145127	37 - 48	7 - 10	1.37	0.286667	AH9.6
WBGene00021084	idpp-12	1.73324	0.00194014	18 - 50	0 - 8	3.07333	0.363333	W08E12.3
WBGene00009896	scl-3	1.73315	0.000105398	138 - 199	13 - 81	10.5067	2.03333	F49E11.11	GLIPR1,CRISP3,R3HDML,CRISP2,CRISPLD2,CRISPLD1,CRISP1,PI15,PI16,GLIPR1L1,CLEC18B,CLEC18A,CLEC18C,GLIPR1L2	ENSG00000139278,ENSG00000096006,ENSG00000101074,ENSG00000124490,ENSG00000103196,ENSG00000121005,ENSG00000124812,ENSG00000137558,ENSG00000164530,ENSG00000173401,ENSG00000140839,ENSG00000157322,ENSG00000157335,ENSG00000180481
WBGene00013103	Y51H4A.7	1.72873	3.90539e-28	688 - 751	170 - 208	14.2333	3.42	Y51H4A.7	UROC1	ENSG00000159650
WBGene00017438	F13H8.5	1.72491	6.01694e-07	145 - 261	32 - 79	4.99333	1.01333	F13H8.5
WBGene00000932	dao-6	1.72224	0.000134498	43 - 56	6 - 13	6.27	1.08333	T05G5.12
WBGene00003165	mec-1	1.71908	2.26118e-12	261 - 327	58 - 103	3.14	0.566667	T07H8.4	TFPI,AMBP,WFIKKN1,WFIKKN2,TFPI2	ENSG00000003436,ENSG00000106927,ENSG00000127578,ENSG00000173714,ENSG00000105825
WBGene00021963	lipl-6	1.71858	0.00102034	27 - 57	2 - 15	1.00667	0.16	Y57E12B.3	LIPA,LIPM,LIPF,LIPK,LIPN,LIPJ	ENSG00000107798,ENSG00000173239,ENSG00000182333,ENSG00000204021,ENSG00000204020,ENSG00000204022
WBGene00050906	F20E11.17	1.71767	6.18495e-06	68 - 92	14 - 22	13.64	1.94	F20E11.17
WBGene00013585	cyp-42A1	1.71621	3.79071e-09	212 - 285	37 - 90	6.19667	1.41667	Y80D3A.5	CYP4V2,CYP3A43,CYP3A5,CYP3A4,CYP3A7,CYP4B1,CYP4A22,CYP4F11,CYP4F22,CYP4F2,CYP4Z1,CYP4F12,CYP4X1,CYP4F8,CYP4F3,CYP4A11	ENSG00000145476,ENSG00000021461,ENSG00000106258,ENSG00000160868,ENSG00000160870,ENSG00000142973,ENSG00000162365,ENSG00000171903,ENSG00000171954,ENSG00000186115,ENSG00000186160,ENSG00000186204,ENSG00000186377,ENSG00000186526,ENSG00000186529,ENSG00000187048
WBGene00003550	nas-32	1.7162	5.92556e-05	63 - 76	8 - 26	1.33333	0.233333	T02B11.7	MEP1A,MEP1B	ENSG00000112818,ENSG00000141434
WBGene00019761	M03F8.1	1.71591	9.33325e-05	54 - 59	5 - 16	2.05	0.4	M03F8.1
WBGene00004156	pqn-74	1.71463	0.000196269	34 - 59	8 - 10	1.47333	0.276667	W02A2.3
WBGene00020436	amdh-1	1.71379	3.94098e-14	280 - 343	70 - 101	9.39	2.13667	T12A2.1	AMDHD1	ENSG00000139344
WBGene00000047	acr-8	1.71346	1.54692e-05	67 - 68	10 - 21	1.3	0.23	ZC504.2	CHRNA3,CHRNA4,CHRNE,CHRNB4,CHRNA2,CHRND,CHRNA1,CHRNB3,CHRNA6,CHRNB2,CHRNA5,CHRNB1,CHRNG	ENSG00000080644,ENSG00000101204,ENSG00000108556,ENSG00000117971,ENSG00000120903,ENSG00000135902,ENSG00000138435,ENSG00000147432,ENSG00000147434,ENSG00000160716,ENSG00000169684,ENSG00000170175,ENSG00000196811
WBGene00000665	col-90	1.71251	0.00260121	2017 - 5673	94 - 792	148.673	11.4333	C29E4.1	SFTPD	ENSG00000133661
WBGene00013849	ZC84.6	1.70858	7.03673e-05	45 - 60	9 - 14	0.446667	0.0866667	ZC84.6	TFPI	ENSG00000003436
WBGene00013404	fbxb-101	1.7083	4.56605e-05	157 - 187	16 - 80	7.75	1.56667	Y63D3A.3
WBGene00008967	F20B10.3	1.70785	0.000162003	50 - 76	6 - 18	3.33	0.48	F20B10.3
WBGene00016744	bbs-9	1.70763	0.000315411	37 - 39	5 - 8	0.61	0.11	C48B6.8	BBS9	ENSG00000122507
WBGene00021643	ccep-290	1.70645	5.75553e-06	71 - 86	13 - 20	0.573333	0.116667	Y47G6A.17
WBGene00000639	col-63	1.70632	0.0013219	15 - 170	9 - 14	2.65667	0.316667	ZK265.2	SFTPD	ENSG00000133661
WBGene00012853	Y44A6D.2	1.70543	8.22106e-09	249 - 361	52 - 123	23.2867	5.41	Y44A6D.2
WBGene00021081	pals-33	1.7036	8.29332e-09	147 - 156	31 - 44	4.83	1.12	W08A12.4
WBGene00006811	unc-79	1.70295	4.33547e-09	187 - 249	39 - 69	1.96	0.443333	E03A3.6	UNC79,UNC79	ENSG00000133958,ENSG00000276416
WBGene00019868	R04B3.3	1.70264	1.03336e-05	64 - 106	15 - 24	1.82	0.366667	R04B3.3
WBGene00003771	nlp-33	1.70152	7.09839e-25	884 - 1040	205 - 335	144.07	34.8	T19C4.7
WBGene00010368	H06A10.1	1.70035	0.000175878	41 - 61	5 - 17	1.59667	0.29	H06A10.1
WBGene00006068	sto-6	1.69901	0.000901034	33 - 41	3 - 13	1.40667	0.186667	Y71H9A.2	NPHS2,STOML3,STOM	ENSG00000116218,ENSG00000133115,ENSG00000148175
WBGene00019640	dos-2	1.69879	0.00266843	15 - 25	0 - 3	0.81	0.07	K10G6.2
WBGene00021873	clec-82	1.69866	0.000112454	49 - 57	8 - 14	1.43	0.26	Y54G2A.8
WBGene00015402	C03G6.17	1.69808	5.84812e-05	67 - 84	8 - 30	3.08	0.586667	C03G6.17
WBGene00021948	kvs-5	1.69701	8.64296e-13	438 - 475	83 - 178	8.75	2.04667	Y55F3C.3	KCNS2,KCNF1,KCNS1,KCNS3,KCNV1,KCNG1,KCNB1,KCNV2,KCNB2	ENSG00000156486,ENSG00000162975,ENSG00000124134,ENSG00000170745,ENSG00000164794,ENSG00000026559,ENSG00000158445,ENSG00000168263,ENSG00000182674
WBGene00020887	hic-1	1.69595	3.10376e-05	61 - 71	9 - 23	4.58333	0.886667	T28B4.4
WBGene00003178	mec-17	1.69503	4.63267e-17	581 - 779	146 - 226	29.62	7.21	F57H12.7	ATAT1,ATAT1,ATAT1,ATAT1,ATAT1,ATAT1,ATAT1	ENSG00000137343,ENSG00000206488,ENSG00000223752,ENSG00000229061,ENSG00000231257,ENSG00000234549,ENSG00000235658
WBGene00021121	W09G12.7	1.69492	5.85003e-13	529 - 653	110 - 164	17.7133	4.01667	W09G12.7	FAM133A,CYLC1,FAM133B	ENSG00000179083,ENSG00000183035,ENSG00000234545
WBGene00008779	F14B4.1	1.69424	1.63885e-18	500 - 598	116 - 194	9.28333	2.22	F14B4.1	LRP1,LRP1B,SORL1,EGF	ENSG00000123384,ENSG00000168702,ENSG00000137642,ENSG00000138798
WBGene00007420	C07E3.10	1.69392	0.000892562	22 - 38	4 - 7	2.93667	0.523333	C07E3.10
WBGene00020678	kin-36	1.69382	8.08711e-09	173 - 263	39 - 73	4.43	1.00667	T22B11.4
WBGene00000741	col-168	1.69294	0.00216883	116 - 419	16 - 79	37.0867	4.32	T10E10.1	MARCO	ENSG00000019169
WBGene00008205	sams-1	1.69272	3.39723e-13	4017 - 5264	790 - 1926	103.13	25.5233	C49F5.1	MAT2A,MAT1A	ENSG00000168906,ENSG00000151224
WBGene00018787	cutl-20	1.69093	8.24252e-12	225 - 290	58 - 66	8.31	1.28	F54A5.2
WBGene00021335	spp-23	1.69035	2.61046e-11	308 - 466	71 - 123	50.04	11.9867	Y34D9A.11
WBGene00044107	F58G6.9	1.68978	2.7076e-09	289 - 435	56 - 131	24.72	6.01333	F58G6.9
WBGene00009791	F46F3.3	1.68889	0.00060398	42 - 51	2 - 15	4.12333	0.636667	F46F3.3
WBGene00017429	F13D11.4	1.68873	2.27627e-13	273 - 341	67 - 100	10.6	2.43667	F13D11.4
WBGene00011999	T24F1.7	1.68681	0.000369155	33 - 49	5 - 10	5.14667	0.936667	T24F1.7
WBGene00010594	swt-5	1.68597	0.00136071	21 - 39	2 - 7	1.37	0.193333	K06A4.4
WBGene00022383	Y95B8A.2	1.68553	5.01248e-05	63 - 116	11 - 34	4.49667	0.86	Y95B8A.2
WBGene00020221	T05A7.3	1.68409	0.000193854	46 - 66	6 - 20	5.38667	1.09333	T05A7.3
WBGene00012729	Y39G8B.10	1.68352	0.00313957	11 - 24	0 - 3	1.66667	0.0933333	Y39G8B.10
WBGene00018639	tbc-16	1.68283	1.19689e-05	63 - 89	14 - 18	1.15333	0.23	F49E10.1	TBC1D16	ENSG00000167291
WBGene00013130	Y52B11B.1	1.6808	0.00192756	28 - 36	1 - 11	5.41	0.7	Y52B11B.1
WBGene00009304	eva-1	1.68035	3.46441e-12	233 - 301	59 - 74	6.45333	1.58	F32A7.3	EVA1C	ENSG00000166979
WBGene00000631	col-54	1.68029	0.00292919	210 - 467	10 - 88	15.4967	1.62333	F33D11.3	SFTPD	ENSG00000133661
WBGene00015169	B0403.5	1.67945	1.30572e-11	197 - 203	45 - 54	4.13667	0.99	B0403.5
WBGene00018042	mks-3	1.67924	0.000526361	33 - 36	5 - 8	0.496667	0.0766667	F35D2.4	TMEM67	ENSG00000164953
WBGene00000244	bbs-8	1.67802	0.000226637	37 - 56	7 - 11	1.07333	0.193333	T25F10.5	TTC8	ENSG00000165533
WBGene00001594	glc-4	1.67796	1.16567e-05	87 - 102	14 - 37	2.13667	0.476667	C27H5.8	GLRA2,GLRB,GLRA3,GLRA1,GLRA4	ENSG00000101958,ENSG00000109738,ENSG00000145451,ENSG00000145888,ENSG00000188828
WBGene00013970	klu-1	1.67539	2.16982e-06	95 - 127	17 - 41	2.53	0.583333	ZK337.2	ZSCAN22,GLI4,BCL6B,WT1,ZNF213,ZNF500,ZNF174,ZSCAN5A,ZSCAN29,ZNF18,ZNF394,ZNF496,ZNF202,ZSCAN21,ZNF232,ZNF24,ZNF449,ZNF396,ZNF397,ZSCAN30,ZSCAN23,ZSCAN25,ZSCAN26,ZSCAN5B,ZNF165,ZSCAN5C	ENSG00000182318,ENSG00000250571,ENSG00000161940,ENSG00000184937,ENSG00000085644,ENSG00000103199,ENSG00000103343,ENSG00000131848,ENSG00000140265,ENSG00000154957,ENSG00000160908,ENSG00000162714,ENSG00000166261,ENSG00000166529,ENSG00000167840,ENSG00000172466,ENSG00000173275,ENSG00000186496,ENSG00000186812,ENSG00000186814,ENSG00000187987,ENSG00000197037,ENSG00000197062,ENSG00000197213,ENSG00000197279…
WBGene00000729	col-156	1.67384	0.00285605	134 - 317	10 - 66	10.2167	1.17333	F57B7.3	SFTPD	ENSG00000133661
WBGene00021850	Y54F10AM.6	1.67354	9.71719e-07	109 - 151	19 - 44	6.76	1.42667	Y54F10AM.6
WBGene00002055	ifc-1	1.67306	4.94472e-08	236 - 546	89 - 126	10.1233	2.27667	F37B4.2	LMNB2,KRT71,KRT1,KRT76,KRT3	ENSG00000176619,ENSG00000139648,ENSG00000167768,ENSG00000185069,ENSG00000186442
WBGene00019901	R05G6.9	1.66917	9.17574e-05	56 - 60	7 - 20	1.85667	0.373333	R05G6.9	ITGBL1,DLK2,DLK1	ENSG00000198542,ENSG00000171462,ENSG00000185559
WBGene00010345	F59F5.7	1.66746	5.17937e-07	95 - 137	24 - 37	1.65667	0.366667	F59F5.7	BRDT,BRD4,BRD3,BRD2,BRD2,BRD2,BRD2,BRD2,BRD2,BRD2	ENSG00000137948,ENSG00000141867,ENSG00000169925,ENSG00000204256,ENSG00000215077,ENSG00000234507,ENSG00000234704,ENSG00000235307,ENSG00000230678,ENSG00000236227
WBGene00020465	T12E12.6	1.6669	0.00152074	23 - 57	3 - 11	0.633333	0.103333	T12E12.6	TRHDE,ANPEP,LVRN	ENSG00000072657,ENSG00000166825,ENSG00000172901
WBGene00020196	T03G11.3	1.66565	0.000900901	27 - 43	4 - 9	0.953333	0.126667	T03G11.3	ZC2HC1A,ZC2HC1B	ENSG00000104427,ENSG00000118491
WBGene00006777	unc-41	1.66555	9.79467e-10	205 - 290	46 - 74	2.06667	0.473333	C27H6.1	STON2,STON1,STON1-GTF2A1L	ENSG00000140022,ENSG00000243244,ENSG00000068781
WBGene00011428	nlp-80	1.66449	1.1082e-08	164 - 202	35 - 66	15.3467	3.55333	T04C12.3
WBGene00013124	Y52B11A.4	1.66368	5.89764e-07	95 - 134	23 - 34	2.68667	0.61	Y52B11A.4	REM1,REM2,GEM,RRAD	ENSG00000088320,ENSG00000139890,ENSG00000164949,ENSG00000166592
WBGene00012763	atln-2	1.66328	1.32752e-05	68 - 84	13 - 25	2.4	0.53	Y41E3.3	ATL2,RNF112,ATL3,ATL1	ENSG00000119787,ENSG00000128482,ENSG00000184743,ENSG00000198513
WBGene00003754	nlp-16	1.66249	5.05292e-06	371 - 449	45 - 197	15.48	3.71333	T13A10.5
WBGene00022391	prhg-1	1.66125	1.06127e-07	106 - 122	22 - 34	2.34	0.556667	Y95B8A.12	PLEKHG7	ENSG00000187510
WBGene00009371	F33H2.8	1.66064	5.79282e-06	90 - 124	18 - 40	4.48667	0.893333	F33H2.8
WBGene00000037	ace-3	1.65964	1.09103e-07	112 - 122	23 - 32	2.2	0.493333	Y48B6A.8	ACHE,BCHE	ENSG00000087085,ENSG00000114200
WBGene00008301	dct-3	1.65868	3.1901e-08	174 - 223	36 - 62	5.47667	1.24667	C54D10.7
WBGene00020840	spch-3	1.6584	0.00359883	3 - 76	0 - 5	4.48667	0.24	T27A3.4	RSRC1	ENSG00000174891
WBGene00007240	C01G10.15	1.65758	0.0017329	64 - 90	2 - 34	13.14	1.96	C01G10.15
WBGene00000928	dao-2	1.65741	5.30763e-11	2616 - 3777	546 - 1347	289.073	71.3933	M03A1.7
WBGene00020983	W03D2.9	1.65714	0.00364425	12 - 19	1 - 1	1.18	0.0833333	W03D2.9
WBGene00011572	mam-5	1.65271	0.00258451	23 - 36	0 - 7	0.786667	0.08	T07C12.8
WBGene00004115	pqn-26	1.6512	0.000286541	36 - 97	10 - 17	1.28333	0.226667	DY3.5	IVL	ENSG00000163207
WBGene00010461	K01D12.1	1.65114	0.00328865	9 - 31	1 - 4	0.95	0.0866667	K01D12.1
WBGene00015473	C05D9.4	1.65029	0.00361245	15 - 22	0 - 3	0.723333	0.11	C05D9.4
WBGene00018074	F35H12.1	1.65002	0.000598808	40 - 42	3 - 12	1.31667	0.206667	F35H12.1	SCHIP1,IQCJ	ENSG00000151967,ENSG00000214216
WBGene00016541	C39H7.1	1.64618	0.00366892	8 - 90	1 - 11	1.70667	0.183333	C39H7.1
WBGene00020414	T10E9.4	1.64612	0.00161246	24 - 166	8 - 26	1.57667	0.23	T10E9.4
WBGene00007530	C11H1.5	1.64592	0.00014947	53 - 135	14 - 34	2.11667	0.42	C11H1.5
WBGene00043743	nsph-4.1	1.64565	0.00349711	3 - 36	0 - 1	2.87667	0.123333	Y59E9AL.2
WBGene00022680	ZK180.6	1.64528	1.73631e-05	157 - 372	39 - 117	5.20333	1.12333	ZK180.6
WBGene00012289	W05H12.1	1.64479	5.12969e-12	267 - 350	64 - 98	7.01667	1.76	W05H12.1
WBGene00006749	unc-9	1.6442	5.11135e-07	248 - 267	31 - 110	4.78333	1.13333	R12H7.1
WBGene00000616	col-39	1.64377	0.00329631	1043 - 2464	76 - 525	72.6267	8.99667	C09G5.4	SFTPD	ENSG00000133661
WBGene00015024	B0205.10	1.64262	0.00367552	7 - 56	1 - 5	0.816667	0.0633333	B0205.10
WBGene00006955	wrt-9	1.64229	0.000459498	46 - 75	4 - 22	1.49667	0.26	B0344.2	DHH,IHH,SHH	ENSG00000139549,ENSG00000163501,ENSG00000164690
WBGene00011072	tag-209	1.64208	1.14665e-06	378 - 469	59 - 197	56.94	13.8167	R06F6.11
WBGene00006778	unc-42	1.64028	0.000149161	45 - 66	9 - 18	3.62667	0.7	F58E6.10	ARX,PRRX1,PRRX2,MIXL1,SEBOX,PROP1	ENSG00000004848,ENSG00000116132,ENSG00000167157,ENSG00000185155,ENSG00000274529,ENSG00000175325
WBGene00012261	lpr-3	1.63915	1.54312e-08	1104 - 1801	246 - 665	29.58	7.32	W04G3.8
WBGene00011262	pho-8	1.63831	1.90483e-07	171 - 202	31 - 77	6.27333	1.47333	R13H4.3	ACPP,ACP6	ENSG00000014257,ENSG00000162836
WBGene00001113	dur-1	1.63786	2.53257e-12	466 - 769	135 - 191	18.2133	5.41667	F25H8.5	SBSN	ENSG00000189001
WBGene00006588	tnt-3	1.63771	1.03403e-18	540 - 646	124 - 185	10.86	2.43	C14F5.3	TNNT2,TNNT3,TNNT1	ENSG00000118194,ENSG00000130595,ENSG00000105048
WBGene00015879	C17B7.5	1.63659	4.3558e-05	61 - 96	10 - 23	0.993333	0.196667	C17B7.5
WBGene00015841	skpo-2	1.6362	3.34385e-05	89 - 149	17 - 50	1.88	0.413333	C16C8.2	PXDNL	ENSG00000147485
WBGene00009949	F53A2.1	1.63614	0.000473946	41 - 62	6 - 20	1.62333	0.343333	F53A2.1
WBGene00016022	C23H3.9	1.63554	6.16202e-05	69 - 118	14 - 38	1.97667	0.426667	C23H3.9	MBLAC1	ENSG00000214309
WBGene00021909	Y55B1BL.1	1.63489	1.77034e-09	685 - 784	129 - 334	25.92	6.44	Y55B1BL.1
WBGene00002048	ida-1	1.63369	6.86547e-24	852 - 1020	237 - 276	14.4233	3.64333	B0244.2	PTPRN,PTPRN2	ENSG00000054356,ENSG00000155093
WBGene00022627	ZC513.2	1.63354	0.00410623	15 - 23	0 - 4	0.743333	0.0566667	ZC513.2
WBGene00013518	Y73F8A.5	1.63309	2.82856e-05	66 - 71	11 - 19	0.78	0.166667	Y73F8A.5	KIAA1324L,KIAA1324	ENSG00000164659,ENSG00000116299
WBGene00008203	clec-198	1.63172	0.00224964	19 - 33	2 - 6	0.573333	0.0566667	C49C3.13
WBGene00003517	nac-1	1.63004	4.22308e-08	402 - 432	62 - 188	8.74333	2.14667	F31F6.6	SLC13A2,SLC13A5,SLC13A3,SLC13A1,SLC13A4	ENSG00000007216,ENSG00000141485,ENSG00000158296,ENSG00000081800,ENSG00000164707
WBGene00022767	ZK563.2	1.62957	0.00173823	23 - 33	2 - 7	0.51	0.0933333	ZK563.2	SLC34A1,SLC34A2,SLC34A3	ENSG00000131183,ENSG00000157765,ENSG00000198569
WBGene00000594	col-3	1.6294	0.00013882	65 - 137	12 - 39	226.427	52.37	T28C6.6	MARCO	ENSG00000019169
WBGene00008263	C53A5.2	1.62847	0.000914231	26 - 45	5 - 9	4.51333	0.796667	C53A5.2	TRMT5	ENSG00000126814
WBGene00003567	ncx-2	1.62727	1.38137e-13	530 - 701	129 - 239	7.48667	1.87333	C10G8.5	SLC8A3,SLC8A2,SLC8A1,ADGRV1	ENSG00000100678,ENSG00000118160,ENSG00000183023,ENSG00000164199
WBGene00020250	T05C1.3	1.62677	0.000882382	27 - 72	7 - 17	2.84667	0.5	T05C1.3
WBGene00018682	aagr-4	1.62671	1.3987e-10	1044 - 1224	210 - 508	16.05	4.02	F52D1.1	GANAB,GANC	ENSG00000089597,ENSG00000214013
WBGene00000615	col-38	1.62658	4.60791e-05	97 - 360	36 - 56	9.53	2.01	F54C9.4	SFTPD	ENSG00000133661
WBGene00019931	R07C12.1	1.6262	0.000689249	39 - 45	5 - 13	1.63333	0.266667	R07C12.1
WBGene00009710	F44G3.10	1.62388	7.10636e-09	196 - 291	41 - 82	17.6333	4.43	F44G3.10
WBGene00003762	nlp-24	1.62292	6.10746e-11	957 - 1265	193 - 459	107.327	27.1133	F35B12.7
WBGene00019029	F58B6.1	1.62047	6.84899e-09	276 - 388	55 - 128	13.01	3.13	F58B6.1
WBGene00001721	grl-12	1.61887	0.00368032	17 - 27	1 - 5	1.30667	0.166667	F28A12.2
WBGene00007987	C36H8.1	1.61791	0.00463104	7 - 44	0 - 3	0.646667	0.04	C36H8.1
WBGene00006742	unc-2	1.6168	1.16688e-10	447 - 609	94 - 209	6.35	1.93667	T02C5.5	CACNA1B,CACNA1E,CACNA1A,CACNA1S,CACNA1F,CACNA1C,CACNA1D	ENSG00000148408,ENSG00000198216,ENSG00000141837,ENSG00000081248,ENSG00000102001,ENSG00000151067,ENSG00000157388
WBGene00019310	K02E7.5	1.61633	0.00137237	29 - 45	2 - 12	4.43667	0.733333	K02E7.5
WBGene00013959	ZK265.7	1.61625	1.81765e-06	119 - 154	19 - 49	4.39333	1.00667	ZK265.7
WBGene00000082	adt-1	1.6136	1.26743e-05	133 - 171	17 - 66	1.20667	0.28	C02B4.1	ADAMTS2,ADAMTS14,ADAMTS3,ADAMTS13,ADAMTS6,ADAMTS17,ADAMTS18,ADAMTS16	ENSG00000087116,ENSG00000138316,ENSG00000156140,ENSG00000160323,ENSG00000049192,ENSG00000140470,ENSG00000140873,ENSG00000145536
WBGene00016734	C46H11.10	1.61346	9.12726e-05	46 - 65	12 - 15	1.93333	0.456667	C46H11.10
WBGene00002039	hum-6	1.61262	3.17087e-13	609 - 795	132 - 264	3.92333	0.99	T10H10.1	MYO7A,MYO7B,MYO15A,MYO10	ENSG00000137474,ENSG00000169994,ENSG00000091536,ENSG00000145555
WBGene00006366	sym-1	1.61169	0.000320123	2588 - 4059	469 - 1359	56.39	11.9233	C44H4.3	LRRC15,GP5,CPN2,NYX	ENSG00000172061,ENSG00000178732,ENSG00000178772,ENSG00000188937
WBGene00015298	rml-4	1.61169	5.66774e-13	953 - 1127	196 - 429	22.22	5.74	C01F1.3	TGDS	ENSG00000088451
WBGene00009579	arrd-6	1.60955	0.000957309	40 - 64	3 - 15	1.12	0.21	F40F8.8	ARRDC3,ARRDC4,ARRDC1,ARRDC2,TXNIP	ENSG00000113369,ENSG00000140450,ENSG00000197070,ENSG00000105643,ENSG00000265972
WBGene00004830	slo-1	1.60825	2.18052e-09	201 - 278	49 - 86	2.66667	0.66	Y51A2D.19	KCNMA1,KCNU1	ENSG00000156113,ENSG00000215262
WBGene00010059	F54E4.3	1.60765	1.72411e-10	254 - 323	60 - 112	7.91667	2.01	F54E4.3
WBGene00000033	abu-10	1.60679	0.00403879	15 - 39	1 - 7	0.8	0.0933333	F35A5.3	KRTAP10-7	ENSG00000272804
WBGene00044630	bus-17	1.60518	2.7563e-05	75 - 113	15 - 37	3.18	0.723333	ZK678.8	B3GALT1	ENSG00000172318
WBGene00044169	C06C3.10	1.60463	0.00264471	20 - 32	3 - 5	2.14667	0.343333	C06C3.10
WBGene00022845	ZK1055.4	1.60452	0.00118765	28 - 37	5 - 9	1.12333	0.21	ZK1055.4
WBGene00007938	C34F6.1	1.60412	0.00018256	50 - 91	10 - 27	0.83	0.16	C34F6.1	WFIKKN1,WFIKKN2	ENSG00000127578,ENSG00000173714
WBGene00000960	dgk-3	1.60232	0.00457792	12 - 23	1 - 3	0.283333	0.03	F54G8.2	DGKB,DGKG,DGKA	ENSG00000136267,ENSG00000058866,ENSG00000065357
WBGene00020281	T06A4.1	1.60173	0.00082874	38 - 59	4 - 17	0.963333	0.166667	T06A4.1	CPA2,CPA4,CPB1,CPA6,CPA1,CPA5,CPA3,CPB2,CPO	ENSG00000158516,ENSG00000128510,ENSG00000153002,ENSG00000165078,ENSG00000091704,ENSG00000158525,ENSG00000163751,ENSG00000080618,ENSG00000144410
WBGene00009292	F31D4.5	1.60133	4.36057e-08	132 - 194	34 - 48	3.80667	0.973333	F31D4.5	PLEKHD1	ENSG00000175985
WBGene00003591	nex-4	1.59884	0.000207629	45 - 61	8 - 15	1.5	0.346667	C37H5.1	ANXA13	ENSG00000104537
WBGene00019751	M03D4.4	1.59841	4.52996e-06	125 - 144	17 - 53	3.87667	0.98	M03D4.4	VEZF1	ENSG00000136451
WBGene00003482	mua-3	1.59576	1.05778e-13	2055 - 2549	396 - 859	9.04	2.35333	K08E5.3	MATN4,MATN3,MATN2,MATN1,CRB1,CRB2,NOTCH3,NOTCH2,NOTCH1,NOTCH4,COCH,COL20A1,COL12A1,COL7A1,COL6A3,VWA2,COL6A5,COL14A1,VIT,COL6A6,EYS,FBN2,FBN3,FBN1,NOTCH4,NOTCH4,NOTCH4,NOTCH4,NOTCH4,NOTCH4	ENSG00000124159,ENSG00000132031,ENSG00000132561,ENSG00000162510,ENSG00000134376,ENSG00000148204,ENSG00000074181,ENSG00000134250,ENSG00000148400,ENSG00000204301,ENSG00000100473,ENSG00000101203,ENSG00000111799,ENSG00000114270,ENSG00000163359,ENSG00000165816,ENSG00000172752,ENSG00000187955,ENSG00000205221,ENSG00000206384,ENSG00000188107,ENSG00000138829,ENSG00000142449,ENSG00000166147,ENSG00000223355…
WBGene00011382	dop-5	1.59571	5.40564e-05	67 - 100	14 - 28	1.20667	0.256667	T02E9.3	HRH1	ENSG00000196639
WBGene00019314	K02E7.10	1.5936	8.48203e-05	53 - 81	12 - 18	2.92	0.646667	K02E7.10	CTSO	ENSG00000256043
WBGene00009730	myo-6	1.591	4.71297e-08	165 - 215	40 - 77	3.53	1.15667	F45G2.2	MYH13,MYH7B,MYH7,MYH1,MYH3,MYH2,MYH8,MYH15,MYH6,MYO5C,MYO5B,MYO5A,MYH4,MYH9,MYH14,MYH10,MYH11	ENSG00000006788,ENSG00000078814,ENSG00000092054,ENSG00000109061,ENSG00000109063,ENSG00000125414,ENSG00000133020,ENSG00000144821,ENSG00000197616,ENSG00000128833,ENSG00000167306,ENSG00000197535,ENSG00000264424,ENSG00000100345,ENSG00000105357,ENSG00000133026,ENSG00000133392
WBGene00011075	R07A4.4	1.59007	0.00177553	19 - 54	6 - 8	0.76	0.12	R07A4.4
WBGene00000608	col-19	1.58921	5.79683e-32	17375 - 24615	5326 - 6175	838.263	220.43	ZK1193.1	SFTPD	ENSG00000133661
WBGene00000166	apt-9	1.58856	0.000146122	56 - 64	9 - 18	1.04333	0.246667	W04G3.4	GGA1,GGA3,GGA2	ENSG00000100083,ENSG00000125447,ENSG00000103365
WBGene00007600	C15C6.1	1.58712	1.80027e-09	177 - 240	51 - 69	10.9267	2.77333	C15C6.1
WBGene00020648	T21D12.7	1.58662	0.00186307	34 - 36	2 - 12	0.68	0.113333	T21D12.7	TFPI	ENSG00000003436
WBGene00003862	old-1	1.58614	0.0052157	14 - 18	1 - 2	0.433333	0.04	C08H9.5	STYK1,PDGFRA,FLT4,FLT1,KDR,PDGFRB,FLT3,KIT,CSF1R	ENSG00000060140,ENSG00000134853,ENSG00000037280,ENSG00000102755,ENSG00000128052,ENSG00000113721,ENSG00000122025,ENSG00000157404,ENSG00000182578
WBGene00016422	noah-1	1.58597	0.00148192	5198 - 7209	659 - 2572	68.6167	13.18	C34G6.6
WBGene00020479	T13C2.3	1.58479	3.17406e-09	214 - 271	43 - 96	6.49333	1.67667	T13C2.3
WBGene00009496	F36H1.11	1.58476	0.000859511	38 - 42	4 - 11	5.28	1.01667	F36H1.11
WBGene00000727	col-154	1.5827	0.00526549	174 - 683	20 - 120	42.9067	4.91667	F55C10.2	MARCO	ENSG00000019169
WBGene00000491	che-12	1.58212	2.35157e-06	95 - 104	19 - 30	1.62667	0.44	B0024.8	TOGARAM1,TOGARAM2	ENSG00000198718,ENSG00000189350
WBGene00016069	C24H10.3	1.58153	0.000617117	47 - 61	4 - 18	4.55333	0.88	C24H10.3
WBGene00017309	F09F9.4	1.58047	2.67238e-05	68 - 84	14 - 24	1.10667	0.24	F09F9.4
WBGene00001000	dim-1	1.5799	1.93992e-17	3841 - 5322	1044 - 1777	117.99	29.69	C18A11.7
WBGene00007605	asp-10	1.57985	4.47548e-49	7926 - 8765	2214 - 2658	250.197	67.3767	C15C8.3	PGC,BACE2,BACE1,CTSE,PGA4,PGA3,PGA5	ENSG00000096088,ENSG00000182240,ENSG00000186318,ENSG00000196188,ENSG00000229183,ENSG00000229859,ENSG00000256713
WBGene00006759	unc-22	1.57889	0.000186725	2294 - 3064	265 - 910	5.01333	1.1	ZK617.1	TTN,OBSL1,HMCN1,HMCN2,OBSCN,DSCAM,DSCAML1,SPEG	ENSG00000155657,ENSG00000124006,ENSG00000143341,ENSG00000148357,ENSG00000154358,ENSG00000171587,ENSG00000177103,ENSG00000072195
WBGene00219436	C49H3.16	1.57878	2.79271e-05	66 - 74	15 - 19	4.69667	1.15333	C49H3.16
WBGene00021690	Y48G8AL.12	1.57712	0.00370319	22 - 60	1 - 14	8.44667	1.40667	Y48G8AL.12
WBGene00000685	col-111	1.57688	2.69161e-07	274 - 465	66 - 158	16.59	4.32333	F29B9.9	C1QTNF2,C1QTNF7,ADIPOQ,OTOL1,C1QTNF9B,C1QTNF9	ENSG00000145861,ENSG00000163145,ENSG00000181092,ENSG00000182447,ENSG00000205863,ENSG00000240654
WBGene00011683	phat-6	1.57593	0.000108236	184 - 225	18 - 99	11.7767	2.77333	T10B10.6
WBGene00003597	nhl-1	1.57571	1.2916e-09	310 - 388	63 - 140	4.28667	1.10667	F54G8.4	TRIM71,TRIM56,TRIM2,TRIM3	ENSG00000206557,ENSG00000169871,ENSG00000109654,ENSG00000110171
WBGene00011668	clec-47	1.57524	0.000756777	48 - 103	6 - 27	5.33667	1.02667	T09F5.9
WBGene00000666	col-91	1.57516	0.000225503	84 - 206	21 - 72	7.1	1.58667	F09G8.6	SFTPD	ENSG00000133661
WBGene00020484	T13C5.3	1.57497	0.00495087	15 - 23	2 - 3	1.00667	0.113333	T13C5.3
WBGene00007266	C03A3.1	1.57479	2.03716e-07	118 - 155	31 - 39	3.99667	0.956667	C03A3.1
WBGene00008033	spin-2	1.57454	2.49774e-05	82 - 110	17 - 39	2.44667	0.573333	C39E9.10	SPNS1,SPNS3,SPNS2	ENSG00000169682,ENSG00000182557,ENSG00000183018
WBGene00002011	hsp-12.2	1.5745	9.22137e-09	282 - 443	70 - 139	32.6867	8.48333	C14B9.1	CRYAB,HSPB6,CRYAA,HSPB1,HSPB2,HSPB8,HSPB3,HSPB2-C11orf52	ENSG00000109846,ENSG00000004776,ENSG00000160202,ENSG00000106211,ENSG00000170276,ENSG00000152137,ENSG00000169271,ENSG00000254445,ENSG00000276076
WBGene00019311	K02E7.6	1.57438	6.54562e-16	578 - 638	130 - 244	13.88	3.83333	K02E7.6
WBGene00020611	txt-11	1.57407	6.73209e-05	55 - 72	12 - 20	1.93	0.463333	T20D4.5
WBGene00044533	F41F3.8	1.57353	0.000349267	46 - 90	9 - 19	4.95667	0.996667	F41F3.8
WBGene00018514	twnk-1	1.57343	0.00244828	27 - 56	3 - 18	0.783333	0.133333	F46G11.1	TWNK,POLN	ENSG00000107815,ENSG00000130997
WBGene00003173	mec-9	1.57165	7.10059e-07	114 - 132	25 - 48	1.94333	0.573333	C50H2.3	TFPI,WFIKKN1,WFIKKN2,SPINT3,TFPI2	ENSG00000003436,ENSG00000127578,ENSG00000173714,ENSG00000101446,ENSG00000105825
WBGene00022103	cdh-12	1.57103	1.4911e-08	245 - 363	61 - 126	1.39	0.363333	Y71D11A.1	PCDH15	ENSG00000150275
WBGene00000251	bli-1	1.57045	0.00542427	12 - 41	1 - 4	0.3	0.03	C09G5.6	SFTPD	ENSG00000133661
WBGene00006655	tub-1	1.57036	0.000110202	59 - 63	10 - 22	1.26333	0.28	F10B5.4	TUB,TULP3,TULP1,TULP2	ENSG00000166402,ENSG00000078246,ENSG00000112041,ENSG00000104804
WBGene00009522	F38A1.9	1.5703	0.000460427	37 - 48	9 - 11	2.08333	0.346667	F38A1.9
WBGene00013263	txdc-12.1	1.56763	1.01265e-12	1905 - 2218	407 - 893	132.87	35.52	Y57A10A.23	TXNDC12,AGR2,AGR3	ENSG00000117862,ENSG00000106541,ENSG00000173467
WBGene00044708	pals-11	1.56724	0.00453529	16 - 26	2 - 4	0.92	0.13	C17H1.13
WBGene00017421	cutl-29	1.56642	3.92013e-05	72 - 113	16 - 30	2.51667	0.563333	F13B9.6
WBGene00009108	F25D1.3	1.56603	0.00629303	8 - 29	0 - 3	0.98	0.0766667	F25D1.3
WBGene00004233	ptr-19	1.56457	0.00187827	33 - 65	4 - 20	0.613333	0.123333	Y39A1B.2	PTCHD1,PTCHD3,PTCHD4	ENSG00000165186,ENSG00000182077,ENSG00000244694
WBGene00086560	ZK355.8	1.56391	0.00175991	28 - 48	4 - 11	6.79333	1.16667	ZK355.8
WBGene00009779	F46C5.2	1.56356	0.000360667	45 - 74	10 - 20	3.46	0.763333	F46C5.2
WBGene00009982	F53F1.4	1.56301	1.02931e-13	656 - 824	144 - 258	63.0667	16.3867	F53F1.4
WBGene00022816	fbn-1	1.56237	0.000598808	1504 - 2027	192 - 756	8.10667	1.75333	ZK783.1	FBN2,FBN3,FBN1,LTBP4,CRB1,CRB2,NOTCH3,NOTCH2,NOTCH1,NOTCH4,EYS,LTBP1,LTBP2,LTBP3,NOTCH4,NOTCH4,NOTCH4,NOTCH4,NOTCH4,NOTCH4	ENSG00000138829,ENSG00000142449,ENSG00000166147,ENSG00000090006,ENSG00000134376,ENSG00000148204,ENSG00000074181,ENSG00000134250,ENSG00000148400,ENSG00000204301,ENSG00000188107,ENSG00000049323,ENSG00000119681,ENSG00000168056,ENSG00000223355,ENSG00000234876,ENSG00000238196,ENSG00000206312,ENSG00000232339,ENSG00000235396
WBGene00020444	T12B3.1	1.56117	0.00554273	15 - 21	1 - 4	0.54	0.07	T12B3.1	PTPDC1	ENSG00000158079
WBGene00003966	pdl-1	1.561	7.63818e-05	84 - 102	13 - 41	7.50333	1.67333	C27H5.1	PDE6D,UNC119,UNC119B	ENSG00000156973,ENSG00000109103,ENSG00000175970
WBGene00016132	C26B9.2	1.55981	0.00650228	14 - 17	0 - 3	0.626667	0.0466667	C26B9.2
WBGene00008807	F14F3.4	1.55976	0.0062675	15 - 38	0 - 8	4.34667	0.353333	F14F3.4
WBGene00016281	pals-32	1.55864	1.82861e-05	80 - 117	19 - 30	3.2	0.82	C31B8.4
WBGene00019772	M04G7.1	1.55859	0.000213032	160 - 198	21 - 95	9.10667	2.18	M04G7.1
WBGene00001171	egl-2	1.55637	6.54577e-05	109 - 156	16 - 63	1.59667	0.363333	F16B3.1	KCNH5,KCNH1	ENSG00000140015,ENSG00000143473,ENSG00000284299
WBGene00001079	dpy-20	1.55556	0.000465735	56 - 89	7 - 31	2.03	0.443333	T22B3.1
WBGene00008655	lips-3	1.55546	5.22965e-06	153 - 250	35 - 87	6.57333	1.63667	F10F2.3
WBGene00019540	epic-2	1.55506	1.087e-10	1227 - 2611	421 - 523	43.57	11.2767	K08D12.6
WBGene00018692	F52E1.2	1.55479	0.000175542	95 - 110	13 - 49	6.07333	1.36333	F52E1.2	CLEC4A,ASGR1,CLEC4E,CLEC4D,CLEC4C,CLEC6A	ENSG00000111729,ENSG00000141505,ENSG00000166523,ENSG00000166527,ENSG00000198178,ENSG00000205846
WBGene00009884	F49C12.15	1.5543	0.000512896	55 - 244	21 - 51	2.05333	0.44	F49C12.15
WBGene00011895	T21C9.9	1.55398	6.88278e-05	60 - 101	17 - 25	2.15333	0.496667	T21C9.9
WBGene00012857	pbo-5	1.5533	1.92967e-06	116 - 146	23 - 47	3.12667	0.806667	Y44A6E.1	HTR3B,HTR3A,HTR3C,HTR3E,HTR3D,ZACN	ENSG00000149305,ENSG00000166736,ENSG00000178084,ENSG00000186038,ENSG00000186090,ENSG00000186919
WBGene00009523	clec-165	1.55279	0.000354687	55 - 64	6 - 21	2.87333	0.643333	F38A1.10
WBGene00001188	egl-20	1.55279	2.12726e-13	350 - 373	82 - 116	6.93333	1.88	W08D2.1	WNT16,WNT11,WNT9A,WNT9B	ENSG00000002745,ENSG00000085741,ENSG00000143816,ENSG00000158955
WBGene00006306	sue-1	1.55198	9.72295e-07	105 - 135	27 - 36	2.47667	0.603333	F07A5.5
WBGene00003523	nas-4	1.55196	4.81177e-05	73 - 146	22 - 42	3.01333	0.643333	C05D11.6	ASTL,MEP1A,MEP1B	ENSG00000188886,ENSG00000112818,ENSG00000141434
WBGene00009096	fipr-1	1.55021	0.00478749	234 - 315	11 - 96	35.3767	5.59333	F23H12.8
WBGene00004921	snt-1	1.54996	6.993e-07	313 - 360	58 - 162	7.30667	1.90333	F31E8.2	SYT1,SYT2,SYT5,SYT8	ENSG00000067715,ENSG00000143858,ENSG00000129990,ENSG00000149043
WBGene00003909	pag-3	1.54984	0.00150457	30 - 41	5 - 9	1.20333	0.216667	F45B8.4	GFI1,GFI1B	ENSG00000162676,ENSG00000165702
WBGene00019908	R05H11.2	1.54942	0.000147593	54 - 70	11 - 17	4.37333	0.86	R05H11.2
WBGene00010738	K10D3.4	1.54925	1.79611e-11	772 - 1389	262 - 369	12.4467	3.09333	K10D3.4	TFPI	ENSG00000003436
WBGene00011235	suro-1	1.54903	8.2593e-06	223 - 468	59 - 163	5.34667	1.3	R11A5.7	CPA2,CPA1,CPA4,CPB1,CPA5,CPA6,CPA3,CPB2,CPO	ENSG00000158516,ENSG00000091704,ENSG00000128510,ENSG00000153002,ENSG00000158525,ENSG00000165078,ENSG00000163751,ENSG00000080618,ENSG00000144410
WBGene00011708	T11B7.5	1.54881	3.09285e-05	289 - 394	37 - 165	21.5767	5.34667	T11B7.5
WBGene00000188	arl-3	1.54825	7.64489e-05	58 - 73	13 - 21	4.53333	1.10667	F19H8.3	ARL3	ENSG00000138175
WBGene00020836	lgc-34	1.54797	2.0459e-09	303 - 414	77 - 152	11.2067	2.93333	T27A1.4
WBGene00006970	zag-1	1.54762	3.64703e-08	143 - 158	32 - 54	2.77333	0.69	F28F9.1	ZEB1,ZEB2,ZNF787,ZNF853,ZNF219	ENSG00000148516,ENSG00000169554,ENSG00000142409,ENSG00000236609,ENSG00000165804
WBGene00009806	F47B8.5	1.54752	0.00588379	16 - 30	0 - 6	0.98	0.123333	F47B8.5
WBGene00007479	C09F9.2	1.54714	0.00253213	643 - 1132	77 - 377	8.65	1.65667	C09F9.2
WBGene00011763	T14B1.1	1.54587	1.32686e-09	457 - 687	123 - 251	9.48333	2.58333	T14B1.1
WBGene00022093	Y69A2AR.22	1.54569	4.75794e-05	334 - 412	46 - 199	23.1167	5.54667	Y69A2AR.22
WBGene00044573	C15B12.9	1.54487	0.00565921	13 - 24	2 - 3	0.906667	0.103333	C15B12.9
WBGene00016204	gsto-1	1.54486	3.17315e-10	288 - 303	62 - 124	10.1533	2.80667	C29E4.7	GSTO1,GSTO2	ENSG00000148834,ENSG00000065621
WBGene00044163	F49C5.11	1.54411	0.00357088	28 - 64	3 - 21	3.09333	0.443333	F49C5.11
WBGene00020677	T22B11.3	1.54348	0.00459953	20 - 21	3 - 4	0.64	0.0966667	T22B11.3	TIE1,TEK	ENSG00000066056,ENSG00000120156
WBGene00017379	F11C7.7	1.54286	0.00625903	13 - 34	1 - 6	2.42333	0.256667	F11C7.7
WBGene00022144	pghm-1	1.54238	3.0258e-10	746 - 994	169 - 373	32.1233	8.60667	Y71G12B.4
WBGene00013851	ZC101.1	1.5412	0.00315319	21 - 35	3 - 7	0.386667	0.0666667	ZC101.1
WBGene00015286	best-3	1.5394	7.35378e-08	216 - 316	50 - 111	5.18	1.37	C01B12.3	BEST3,BEST2,BEST4,BEST1	ENSG00000127325,ENSG00000039987,ENSG00000142959,ENSG00000167995
WBGene00004231	ptr-17	1.53862	0.000508421	53 - 63	7 - 25	0.823333	0.173333	Y18D10A.7	PTCHD1,PTCHD3,PTCHD4,PTCHD3	ENSG00000165186,ENSG00000182077,ENSG00000244694,ENSG00000276595
WBGene00023490	F36A2.14	1.53731	0.000174501	62 - 96	11 - 29	2.60667	0.633333	F36A2.14
WBGene00018640	F49E10.2	1.53713	0.00624177	12 - 49	1 - 9	0.416667	0.0633333	F49E10.2
WBGene00021969	Y57G7A.6	1.53709	0.00645286	11 - 55	1 - 8	0.416667	0.05	Y57G7A.6
WBGene00018429	F44E7.7	1.53681	0.00647466	14 - 20	1 - 4	0.476667	0.0633333	F44E7.7
WBGene00011004	R04B5.6	1.53617	0.00328237	27 - 34	2 - 10	0.88	0.16	R04B5.6	SORD	ENSG00000140263
WBGene00022160	Y71G12B.25	1.53536	3.56929e-08	340 - 675	111 - 192	14.9833	3.96667	Y71G12B.25
WBGene00007375	C06C3.4	1.53499	0.000288567	70 - 78	7 - 28	3.67667	0.866667	C06C3.4
WBGene00000401	cdh-9	1.53252	1.68951e-07	124 - 143	32 - 46	2.58	0.646667	F59C12.1	PCDH15,PCDHB5,PCDHGA8,PCDHGB2,PCDHGB7,PCDHGA3,PCDHGB3,CDHR1,PCDH1,PCDH7,PCDH9,PCDH20,PCDHB4,PCDHA6,PCDHGA2,PCDHB2,PCDHB3,PCDHB6,PCDHB7,PCDHB15,PCDH12,PCDH17,PCDHB8,PCDHB10,PCDHB14,PCDHB12,PCDH8,PCDH10,PCDH19,PCDHB1,PCDHB9,PCDHB13,PCDH18,PCDHB11,PCDHGA1,PCDHA9,PCDHA8,PCDHA7,PCDHA5,PCDHA4,PCDHA2,PCDHA1,PCDHA13,PCDHGC3,PCDHGC5,PCDHGC4,PCDHAC2,PCDHAC1,PCDHA11,PCDHA10,PCDHA12,PCDHGA12,PCDHGB6,PCDHGA5,…	ENSG00000150275,ENSG00000113209,ENSG00000253767,ENSG00000253910,ENSG00000254122,ENSG00000254245,ENSG00000262209,ENSG00000148600,ENSG00000156453,ENSG00000169851,ENSG00000184226,ENSG00000280165,ENSG00000081818,ENSG00000081842,ENSG00000081853,ENSG00000112852,ENSG00000113205,ENSG00000113211,ENSG00000113212,ENSG00000113248,ENSG00000113555,ENSG00000118946,ENSG00000120322,ENSG00000120324,ENSG00000120327…
WBGene00006589	tnt-4	1.53168	0.00767468	262 - 526	6 - 96	13.0167	1.25667	T08B1.2	TNNT2,TNNT3,TNNT1	ENSG00000118194,ENSG00000130595,ENSG00000105048
WBGene00014178	ZK1010.4	1.53058	0.000615022	41 - 61	8 - 14	2.49333	0.59	ZK1010.4
WBGene00008656	lron-5	1.53023	0.00350491	54 - 62	1 - 26	1.14333	0.2	F10F2.4
WBGene00010200	F57C7.4	1.52926	0.00115303	42 - 44	5 - 16	0.353333	0.0666667	F57C7.4
WBGene00008652	F10D11.6	1.52923	3.30617e-11	663 - 1040	195 - 349	12.4733	3.29	F10D11.6	PLTP,BPI,LBP,BPIFC	ENSG00000100979,ENSG00000101425,ENSG00000129988,ENSG00000184459
WBGene00206373	C27A2.12	1.52831	0.00200407	33 - 69	6 - 20	1.42333	0.26	C27A2.12	ACPP,ACP2,ACPT	ENSG00000014257,ENSG00000134575,ENSG00000142513
WBGene00009395	clec-64	1.5282	0.00293326	26 - 40	4 - 12	1.16	0.186667	F35C5.7
WBGene00021743	Y50D4B.4	1.52774	6.908e-11	830 - 1022	165 - 401	31.13	8.43667	Y50D4B.4
WBGene00012753	Y41C4A.6	1.52761	0.0022037	65 - 78	5 - 35	6.76667	1.40667	Y41C4A.6
WBGene00009800	rrc-1	1.52664	1.54209e-09	219 - 271	52 - 92	3.75667	1.02333	F47A4.3	ARHGAP33,ARHGAP32,ARHGAP31,ARHGAP30	ENSG00000004777,ENSG00000134909,ENSG00000031081,ENSG00000186517
WBGene00006055	ssr-2	1.52544	0.000613887	38 - 49	9 - 11	1.63	0.343333	C14A11.7	RASD1,RASD2	ENSG00000108551,ENSG00000100302
WBGene00020126	flp-26	1.52469	8.31136e-06	148 - 175	25 - 73	17.7133	4.54	R173.4
WBGene00004910	snf-11	1.52278	3.20495e-07	197 - 282	45 - 103	4.61333	1.18333	T03F7.1	SLC6A1,SLC6A8,SLC6A13,SLC6A12,SLC6A6,SLC6A11	ENSG00000157103,ENSG00000130821,ENSG00000010379,ENSG00000111181,ENSG00000131389,ENSG00000132164,ENSG00000198555
WBGene00013693	Y105E8B.9	1.52273	5.99867e-06	273 - 386	53 - 163	6.46	1.61667	Y105E8B.9	GUSB	ENSG00000169919
WBGene00020973	W03B1.3	1.52067	0.00734928	19 - 25	0 - 7	0.8	0.11	W03B1.3
WBGene00000692	col-118	1.52013	2.34681e-26	882 - 983	258 - 306	40.88	11.2767	T11B7.3	SFTPD	ENSG00000133661
WBGene00004130	ketn-1	1.51958	0.000235866	1990 - 2918	288 - 929	6.88333	1.61667	F54E2.3	TTN,OBSL1,HMCN1,HMCN2,OBSCN,MXRA5,IGSF10,PALLD,MYPN,SPEG	ENSG00000155657,ENSG00000124006,ENSG00000143341,ENSG00000148357,ENSG00000154358,ENSG00000101825,ENSG00000152580,ENSG00000129116,ENSG00000138347,ENSG00000072195
WBGene00011768	oac-46	1.51846	1.8847e-08	670 - 754	127 - 345	11.9567	3.22333	T14D7.2
WBGene00000016	abf-5	1.51826	0.00100482	172 - 190	14 - 101	17.64	3.94667	T22H6.5
WBGene00009375	arcp-1	1.51626	6.64336e-05	123 - 170	16 - 63	2.09667	0.483333	F34D10.6
WBGene00012814	Y43F8B.3	1.51591	0.00112295	46 - 90	8 - 28	0.646667	0.15	Y43F8B.3	WFIKKN1,WFIKKN2	ENSG00000127578,ENSG00000173714
WBGene00017577	F18F11.4	1.51487	0.00036101	43 - 72	12 - 20	1.30333	0.306667	F18F11.4
WBGene00012791	Y43D4A.5	1.51445	0.00110967	45 - 102	9 - 33	0.95	0.176667	Y43D4A.5	CHTF8	ENSG00000168802
WBGene00004267	rab-3	1.51383	8.78727e-11	301 - 334	71 - 131	10.68	2.93667	C18A3.6	RAB3C,RAB3A,RAB3B,RAB3D	ENSG00000152932,ENSG00000105649,ENSG00000169213,ENSG00000105514
WBGene00004854	slt-1	1.51346	4.65994e-10	250 - 343	73 - 111	2.54333	0.673333	F40E10.4	SLIT2,SLIT3,SLIT1	ENSG00000145147,ENSG00000184347,ENSG00000187122
WBGene00010468	K01D12.9	1.50987	0.00801761	149 - 319	1 - 37	20.1633	1.18333	K01D12.9
WBGene00002243	lad-2	1.50967	3.67849e-08	166 - 228	47 - 72	2.16	0.563333	Y54G2A.25	NRCAM,NFASC,L1CAM,CHL1	ENSG00000091129,ENSG00000163531,ENSG00000198910,ENSG00000134121
WBGene00001541	gcy-15	1.50936	0.00572268	19 - 27	2 - 5	0.263333	0.03	ZC239.7
WBGene00009343	F32H2.6	1.50878	1.52486e-06	179 - 310	41 - 103	15.4267	4.20667	F32H2.6	FASN	ENSG00000169710
WBGene00013474	nsph-3.1	1.50865	0.00632045	17 - 168	4 - 27	2.63333	0.43	Y69E1A.2
WBGene00003929	pat-2	1.50788	1.33011e-15	1528 - 1670	334 - 673	15.6533	4.40667	F54F2.1	ITGA8,ITGAV,ITGA5,ITGA2B	ENSG00000077943,ENSG00000138448,ENSG00000161638,ENSG00000005961
WBGene00015720	C13A2.3	1.50758	0.00839774	13 - 17	1 - 2	0.42	0.04	C13A2.3
WBGene00020052	R13A5.10	1.50694	3.92456e-05	105 - 140	21 - 53	9.57333	2.35667	R13A5.10
WBGene00020617	T20D4.11	1.50675	2.44645e-07	116 - 142	33 - 42	8.61	2.29667	T20D4.11
WBGene00020567	adt-3	1.506	0.000110816	65 - 82	11 - 28	0.93	0.233333	T19D2.1	ADAMTS3,ADAMTS2,ADAMTS14,ADAMTS13,ADAMTS19,ADAMTS15	ENSG00000156140,ENSG00000087116,ENSG00000138316,ENSG00000160323,ENSG00000145808,ENSG00000166106
WBGene00044445	C02F5.14	1.50483	0.000623881	91 - 99	8 - 47	8.91667	2.10667	C02F5.14
WBGene00013715	Y106G6G.6	1.50396	0.00306638	23 - 45	4 - 11	1.14	0.226667	Y106G6G.6	ARFGEF3	ENSG00000112379
WBGene00006870	vab-3	1.50379	1.35858e-06	248 - 280	46 - 128	8.11333	2.08333	F14F3.1	PAX6	ENSG00000007372
WBGene00019840	R02F11.2	1.50206	0.00304502	23 - 45	5 - 9	1.49667	0.3	R02F11.2
WBGene00017201	grsp-4	1.50191	9.32501e-11	458 - 632	113 - 212	35.3133	9.79667	F07C4.7
WBGene00001690	grd-1	1.50108	0.000267951	52 - 118	18 - 32	0.986667	0.226667	R08B4.1
WBGene00009573	F40E10.5	1.49988	0.00088848	37 - 118	15 - 26	3.16333	0.68	F40E10.5
WBGene00000068	acy-1	1.49955	3.43549e-11	334 - 404	89 - 154	3.64667	1.00333	F17C8.1	ADCY9	ENSG00000162104
WBGene00011879	pho-7	1.49911	4.49234e-06	128 - 155	25 - 63	4.41333	1.14667	T21B6.2	ACPP,ACP6	ENSG00000014257,ENSG00000162836
WBGene00001430	fkb-5	1.4979	6.86784e-12	900 - 1120	227 - 446	45.9933	12.7833	C50F2.6	FKBP9,FKBP10,FKBP11	ENSG00000122642,ENSG00000141756,ENSG00000134285
WBGene00003772	nlr-1	1.49742	3.32363e-12	299 - 343	82 - 123	4.33333	1.2	F20B10.1	CNTNAP5,CNTNAP3,CNTNAP1,CNTNAP4,CNTNAP3B,CNTNAP2,CNTNAP2	ENSG00000155052,ENSG00000106714,ENSG00000108797,ENSG00000152910,ENSG00000154529,ENSG00000174469,ENSG00000278728,ENSG00000283378
[truncated: 1,386 more rows]
